# Supplementary material for: Functional roles of eriocalyxin B in zebrafish revealed by transcriptome analysis
Source: Royal Society of Chemistry journal article supplement (doi:10.1039/c7mo00125h), 2018-04-20
Supplement: c7mo00125h1.zip [file c7mo00125h1.zip]

## Sheet: S1
gene	locus	sample_1	sample_2	status	value_1	value_2	log2(fold_change)	test_stat	p_value	q_value	significant
aars	NC_007129.6:18647206-18678385	control	10	OK	43.1595	80.2201	0.894286	2.72988	0.00435	0.191934	no
abca12	NC_007120.6:40883823-41044700	control	10	OK	3.66074	7.16118	0.96806	3.10511	0.0017	0.104146	no
abca1a	NC_007112.6:51925810-51993669	control	10	OK	5.37384	10.514	0.968287	3.15434	0.0014	0.0910234	no
abca1b	NC_007125.6:6117271-6212466	control	10	OK	11.2755	18.2966	0.698377	2.24611	0.0225	0.510041	no
abcb6a	NC_007112.6:5437339-5463080	control	10	OK	2.58562	10.0746	1.96213	5.74542	5e-05	0.00654421	yes
abcc1	NC_007114.6:36571648-36602104	control	10	OK	3.54985	5.87554	0.726964	2.31976	0.0223	0.507479	no
abcc2	NC_007124.6:551335-581297	control	10	OK	4.82654	16.4127	1.76575	5.65734	5e-05	0.00654421	yes
abcc4	NC_007117.6:7165534-7234620	control	10	OK	7.15619	11.5566	0.691451	2.2653	0.02325	0.517001	no
abhd4	NC_007113.6:52052351-52064349	control	10	OK	6.36139	27.0733	2.08946	6.15769	5e-05	0.00654421	yes
acana	NC_007118.6:48489044-48532405	control	10	OK	3.26467	1.30486	-1.32305	-2.86157	0.0046	0.19957	no
acanb	NC_007136.6:19111691-19249056	control	10	OK	3.85471	1.76662	-1.12563	-2.38972	0.01865	0.464083	no
acer2	NC_007118.6:71269638-71290632	control	10	OK	2.60571	5.83242	1.16242	3.04917	0.0012	0.0822993	no
ache	NC_007118.6:25805961-25816705	control	10	OK	28.5318	17.1009	-0.738501	-2.26792	0.01785	0.452211	no
ackr4b	NC_007135.6:11209962-11305799	control	10	OK	2.44504	1.08878	-1.16715	-2.16948	0.031	0.595532	no
acmsd	NC_007120.6:23433424-23443001	control	10	OK	3.03306	1.2785	-1.24632	-2.55181	0.01695	0.440241	no
acta1a	NC_007112.6:53286215-53293789	control	10	OK	267.196	130.481	-1.03406	-3.0847	0.00225	0.124942	no
acta1b	NC_007124.6:24148607-24153992	control	10	OK	2186.4	566.587	-1.94819	-4.05605	0.0006	0.0496031	yes
acta2	NC_007123.6:16978608-16993856	control	10	OK	7.89312	2.74457	-1.52401	-3.80034	0.0005	0.0436552	yes
actn2,p4ha1b	NC_007128.6:20099830-20147407	control	10	OK	23.8117	9.75906	-1.28686	-3.82633	5e-05	0.00654421	yes
actn3a	NC_007132.6:27346257-27368278	control	10	OK	297.279	119.398	-1.31604	-3.48985	0.00145	0.0933211	no
actn3b	NC_007118.6:6814962-6898486	control	10	OK	120.538	49.2667	-1.2908	-3.70272	0.00035	0.0331638	yes
acy3.1	NC_007112.6:51864673-51870699	control	10	OK	0.822107	2.02431	1.30003	2.24087	0.02825	0.569252	no
adamts5	NC_007112.6:693482-719747	control	10	OK	1.71444	0.981715	-0.804361	-2.09132	0.0335	0.618229	no
adap2	NC_007114.6:26136510-26152118	control	10	OK	0.978477	0.467083	-1.06686	-2.00935	0.043	0.695218	no
adcy2a	NC_007127.6:9383620-9492774	control	10	OK	1.32003	0.633454	-1.05926	-2.2394	0.02595	0.545675	no
adm2a	NC_007115.6:9877540-9890951	control	10	OK	2.10886	3.79935	0.849292	2.14533	0.0311	0.596798	no
adprm	NC_007123.6:90490-93613	control	10	OK	0.788402	2.51561	1.67391	3.19814	0.0012	0.0822993	no
adra1d	NC_007112.6:41256779-41281427	control	10	OK	1.5054	0.847052	-0.829624	-1.96629	0.0438	0.701336	no
adss	NC_007124.6:11354399-11404464	control	10	OK	27.4449	13.5932	-1.01365	-3.0085	0.00205	0.117277	no
adssl1	NC_007128.6:663432-695526	control	10	OK	44.0448	27.5268	-0.678135	-2.15484	0.03215	0.60664	no
aff2	NC_007125.6:20045309-20432067	control	10	OK	1.42357	2.49494	0.809488	2.15789	0.0286	0.573663	no
agbl4	NC_007119.6:15271184-15955773	control	10	OK	1.8173	7.5373	2.05225	1.45213	0.0488	0.726864	no
aglb	NC_007135.6:29796381-29834774	control	10	OK	5.0618	1.83665	-1.46257	-4.2741	5e-05	0.00654421	yes
agrp2	NC_007113.6:7550869-7560247	control	10	OK	9.2644	3.91602	-1.24231	-2.58026	0.01085	0.338117	no
agt	NC_007124.6:23858002-23865424	control	10	OK	10.7117	6.28508	-0.769185	-2.22491	0.02455	0.531889	no
agtr1a	NC_007113.6:25272082-25277452	control	10	OK	0.887248	0.255429	-1.79642	-2.42469	0.03325	0.615943	no
agtr2	NC_007116.6:22738639-22745694	control	10	OK	5.28232	2.70261	-0.966816	-2.41144	0.02105	0.493136	no
ahnak	NC_007125.6:26461182-26498229	control	10	OK	19.1013	32.025	0.745529	2.01325	0.04265	0.693724	no
ahr1b	NC_007133.6:12952173-13018308	control	10	OK	4.70078	2.9303	-0.68185	-2.08199	0.03185	0.604563	no
ahsg	NC_007133.6:37920958-37927975	control	10	OK	1.40524	0.33222	-2.0806	-3.02945	0.01525	0.41486	no
aifm2	NC_007124.6:6908863-6926848	control	10	OK	22.1501	49.863	1.17066	3.82019	5e-05	0.00654421	yes
aifm4	NC_007126.6:25503468-25513155	control	10	OK	8.00787	46.1921	2.52816	7.82442	5e-05	0.00654421	yes
aifm5	NC_007132.6:39254747-39291248	control	10	OK	1.29849	0.394368	-1.71922	-3.70003	0.0007	0.0554481	no
aim1b	NC_007115.6:847587-888427	control	10	OK	2.26496	3.70331	0.709328	2.24526	0.01865	0.464083	no
akap11	NC_007120.6:17964205-17998920	control	10	OK	3.35144	5.3466	0.673838	2.14908	0.0266	0.553361	no
alas1	NC_007122.6:241308-251810	control	10	OK	40.5927	72.6798	0.840333	2.69013	0.00605	0.240841	no
alas2	NC_007119.6:21321854-21336943	control	10	OK	39.7879	75.0766	0.916033	2.91715	0.0039	0.178373	no
aldh1a2	NC_007118.6:30055068-30096477	control	10	OK	25.6601	16.7329	-0.616845	-1.98292	0.0409	0.679948	no
aldoab	NC_007123.6:4015414-4033068	control	10	OK	604.477	319.838	-0.918344	-2.48175	0.0134	0.387571	no
and4	NC_007125.6:135967-136391	control	10	OK	101.884	60.0713	-0.762181	-2.00807	0.0488	0.726864	no
angpt2b	NC_007130.6:36212203-36265298	control	10	OK	1.99758	0.806489	-1.30853	-2.3632	0.02105	0.493136	no
angpt4	NC_007117.6:51932218-52031911	control	10	OK	1.37496	0.386386	-1.83128	-3.40867	0.0016	0.0998545	no
angptl2a	NC_007116.6:4372666-4403888	control	10	OK	3.33067	1.17645	-1.50137	-3.24167	0.00315	0.156879	no
ankrd1b	NC_007123.6:16391933-16403689	control	10	OK	37.96	12.0859	-1.65116	-4.8252	5e-05	0.00654421	yes
ankrd24	NC_007133.6:21334174-21368190	control	10	OK	2.05392	0.901446	-1.18807	-2.72428	0.0083	0.295471	no
ano2	NC_007115.6:4258537-4347918	control	10	OK	1.55492	0.752072	-1.0479	-1.99358	0.03535	0.633806	no
antxr2b	NC_007121.6:9361615-9386392	control	10	OK	1.68914	0.656937	-1.36246	-2.29638	0.0234	0.518525	no
anxa2a	NC_007136.6:33527903-33541952	control	10	OK	49.1772	32.0839	-0.616138	-1.93156	0.04235	0.692059	yes
anxa2b	NC_007118.6:29247245-29262798	control	10	OK	5.0618	1.83665	-1.46257	-4.2741	5e-05	0.00654421	no
anxa3a	NC_007116.6:38487210-38495699	control	10	OK	22.1132	13.2313	-0.740949	-2.36509	0.0187	0.464502	no
anxa6	NC_007125.6:50310119-50372993	control	10	OK	22.2089	7.06179	-1.65303	-5.06916	5e-05	0.00654421	yes
apaf1	NC_007115.6:17854729-17885261	control	10	OK	5.79219	9.63386	0.734005	2.35367	0.0169	0.439268	no
apoa4a	NC_007130.6:10927027-10931909	control	10	OK	25.6834	15.7706	-0.703596	-2.14308	0.0305	0.590625	no
apoba	NC_007128.6:30687112-30711003	control	10	OK	21.9613	43.067	0.971619	2.7357	0.00745	0.274998	no
apobb.1	NC_007131.6:31366844-31382016	control	10	OK	152.581	506.794	1.73182	2.94839	0.00525	0.217527	no
apoea	NC_007130.6:10936232-10940769	control	10	OK	648.275	388.683	-0.738011	-2.04346	0.04475	0.703212	no
aqp4	NC_007131.6:18263730-18290764	control	10	OK	4.81632	2.23831	-1.10552	-2.64458	0.00615	0.243026	no
aqp8a.1	NC_007123.6:20244234-20251184	control	10	OK	9.44243	2.4274	-1.95975	-4.33454	5e-05	0.00654421	yes
aqp8b	NC_007114.6:18422538-18426117	control	10	OK	14.608	7.04884	-1.0513	-2.80308	0.00715	0.268165	no
aqp9b	NC_007118.6:30100714-30119038	control	10	OK	1.89037	0.830534	-1.18656	-2.06073	0.0407	0.678879	no
arg2	NC_007124.6:32894096-32903811	control	10	OK	3.39256	12.9784	1.93566	5.49032	5e-05	0.00654421	yes
arhgap20	NC_007120.6:29717589-29735166	control	10	OK	3.02407	1.68638	-0.842561	-2.38815	0.014	0.397374	no
arhgap4b	NC_007134.6:18688856-18761179	control	10	OK	8.90058	5.57838	-0.674054	-2.16029	0.0275	0.562557	no
arl3l1	NC_007132.6:33139025-33153279	control	10	OK	10.8092	4.15356	-1.37984	-3.60012	0.00035	0.0331638	yes
arl3l2	NC_007125.6:891443-898803	control	10	OK	2.20655	0.604889	-1.86705	-2.83189	0.00815	0.29251	no
arr3a	NC_007121.6:26785753-26849684	control	10	OK	26.57	10.4288	-1.34922	-2.90873	0.00415	0.186041	no
arr3b	NC_007125.6:32497789-32509214	control	10	OK	4.77994	1.44566	-1.72526	-3.80585	0.0005	0.0436552	yes
arrdc2	NC_007122.6:13466844-13476123	control	10	OK	6.38163	9.85866	0.627467	1.94668	0.04455	0.701805	no
arrdc3b	NC_007121.6:43914682-43924650	control	10	OK	13.7103	26.0378	0.925345	3.02698	0.00315	0.156879	no
asb10	NC_007135.6:34199758-34221441	control	10	OK	3.21975	1.19877	-1.42539	-2.85476	0.0071	0.267148	no
asb14b	NC_007134.6:19562988-19577681	control	10	OK	3.75301	1.8991	-0.982731	-2.45039	0.01385	0.395844	no
asb15a	NC_007136.6:27380660-27399467	control	10	OK	10.4146	5.98022	-0.80033	-2.36708	0.0172	0.443771	no
asb2a.1	NC_007131.6:27398053-27431222	control	10	OK	5.72444	3.5506	-0.68907	-1.961	0.04685	0.713634	no
asns	NC_007130.6:26070137-26093769	control	10	OK	10.2808	17.059	0.730588	2.39579	0.01665	0.43617	no
aspg	NC_007128.6:45754665-45791356	control	10	OK	4.89529	9.79447	1.00057	3.00383	0.0028	0.145341	no
atf3	NC_007131.6:37891798-37897858	control	10	OK	6.62377	21.4299	1.6939	5.33969	5e-05	0.00654421	yes
atf5a	NC_007116.6:29812497-29818701	control	10	OK	9.9194	24.4705	1.30272	4.09272	5e-05	0.00654421	yes
atf5b	NC_007126.6:17924354-17987614	control	10	OK	9.23866	20.2833	1.13454	2.29125	0.0249	0.535495	no
atg9a	NC_007117.6:11014562-11031166	control	10	OK	4.61688	7.18458	0.637987	1.94947	0.04865	0.726513	no
atp10b	NC_007125.6:21996540-22065709	control	10	OK	0.861415	1.57594	0.871429	2.1401	0.02815	0.568382	no
atp1a2a	NC_007113.6:44350079-44402539	control	10	OK	25.6216	15.2384	-0.749651	-2.45234	0.01505	0.412626	no
atp2a1l	NC_007123.6:13206092-13223444	control	10	OK	123.227	52.0751	-1.24266	-3.68635	0.00025	0.0256683	yes
atp2b1b	NC_007136.6:19511753-19568004	control	10	OK	6.60253	4.12277	-0.679404	-2.09988	0.03015	0.586606	no
atp7a	NC_007125.6:22100070-22144910	control	10	OK	4.50899	7.06854	0.648607	2.02967	0.03675	0.645248	no
b2m	NC_007115.6:12794546-12796644	control	10	OK	2.13724	5.67042	1.40771	2.41363	0.01745	0.447092	no
ba1l	NC_007114.6:54843854-54844670	control	10	OK	0	0.666308	inf	#NAME?	0.00275	0.14349	no
bach1	NC_007121.6:25407864-25422647	control	10	OK	6.32859	17.5985	1.4755	4.41576	5e-05	0.00654421	yes
bada	NC_007132.6:27151700-27154457	control	10	OK	5.7863	10.9347	0.918198	2.78285	0.0051	0.213715	no
bbc3	NC_007126.6:23809948-23826371	control	10	OK	0.899502	2.47115	1.45798	3.46408	0.0014	0.0910234	no
bcat1	NC_007115.6:17264444-17308444	control	10	OK	7.15171	13.5118	0.917855	2.63661	0.00765	0.280165	no
bcl3	NC_007127.6:25786322-25824661	control	10	OK	0.191229	0.665105	1.79828	2.82115	0.01265	0.372965	no
bfsp1	NC_007124.6:851412-869842	control	10	OK	13.8926	2.578	-2.42999	-7.45926	5e-05	0.00654421	yes
bfsp2	NC_007113.6:32777911-32786077	control	10	OK	35.9536	8.18095	-2.1358	-6.49983	5e-05	0.00654421	yes
bglap	NC_007114.6:1648398-1651382	control	10	OK	0.996588	0	#NAME?	#NAME?	0.0102	0.326244	no
bik	NC_007115.6:18854009-18857635	control	10	OK	2.58324	5.48197	1.08551	2.18365	0.0285	0.572477	no
birc6	NC_007128.6:22567519-22721793	control	10	OK	4.80836	8.15452	0.762057	2.29335	0.01785	0.452211	no
birc7	NC_007134.6:14461366-14477514	control	10	OK	10.9245	4.52649	-1.2711	-3.12468	0.00125	0.085062	no
blvrb,zgc:113340	NC_007129.6:46153521-46170209	control	10	OK	34.0994	73.4808	1.10762	3.5372	0.00035	0.0331638	yes
bmb	NC_007136.6:35742745-35760296	control	10	OK	1.77088	4.07214	1.20132	2.88668	0.00645	0.250498	no
bzw1b	NC_007120.6:426552-443847	control	10	OK	58.0697	90.4509	0.63935	2.02608	0.0394	0.666886	no
c12h7orf62	NC_007123.6:48553128-48565104	control	10	OK	12.553	7.72089	-0.701189	-1.97848	0.0428	0.694068	no
c13h10orf71	NC_007124.6:30794564-30807823	control	10	OK	2.86994	1.75492	-0.709616	-2.26119	0.02515	0.538227	no
c1ql1	NC_007114.6:31263889-31302487	control	10	OK	3.33464	2.03453	-0.712831	-1.97545	0.044	0.701336	no
c1qtnf6a	NC_007114.6:25086206-25097690	control	10	OK	3.05965	1.58231	-0.95133	-2.32817	0.0146	0.407143	no
c1qtnf9	NC_007135.6:21761604-21768380	control	10	OK	0.745721	0.210326	-1.82601	-2.19837	0.04615	0.711328	no
c3a.1	NC_007112.6:55460925-55507679	control	10	OK	49.8448	111.751	1.16478	3.31988	0.00145	0.0933211	no
c3a.2	NC_007112.6:55560355-55651276	control	10	OK	1.08323	2.13146	0.976498	2.51423	0.0107	0.334634	no
c3a.6	NC_007112.6:55360637-55411312	control	10	OK	1.97333	5.98774	1.60138	4.76158	5e-05	0.00654421	yes
ca15a	NC_007123.6:4283518-4294458	control	10	OK	7.31362	2.15331	-1.76403	-4.09693	0.0001	0.0119493	yes
ca2	NC_007135.6:32732133-32750239	control	10	OK	49.1772	32.0839	-0.616138	-1.93156	0.04235	0.692059	no
ca4a	NC_007116.6:1971710-2014156	control	10	OK	5.96778	2.76873	-1.10797	-3.25031	0.00105	0.0749482	no
cacna1sa,kctd20	NC_007133.6:866710-951959	control	10	OK	7.40886	3.96337	-0.902524	-2.093	0.0273	0.560759	no
cacna1sb	NC_007119.6:25748432-25791731	control	10	OK	7.63726	4.85878	-0.65246	-2.07854	0.03395	0.622814	no
cacna2d4b	NC_007136.6:18925750-18992490	control	10	OK	0.929142	0.262568	-1.82321	-3.00687	0.00605	0.240841	no
cacng6b	NC_007127.6:12938835-12984565	control	10	OK	6.70997	3.34739	-1.00327	-2.04348	0.03055	0.590777	no
cahz	NC_007113.6:29493849-29501572	control	10	OK	87.4932	145.607	0.734832	2.31166	0.021	0.492459	no
cap2	NC_007130.6:46567459-46620413	control	10	OK	18.3319	9.96616	-0.879247	-2.68629	0.00595	0.238487	no
capn3a	NC_007128.6:45191670-45363385	control	10	OK	45.4298	6.54148	-2.79595	-3.60358	5e-05	0.00654421	yes
capn3b	NC_007131.6:26037187-26102339	control	10	OK	20.663	11.0173	-0.907285	-2.84926	0.0036	0.171136	no
carm1l	NC_007121.6:5059890-5090295	control	10	OK	0.949202	0.307528	-1.626	-2.24537	0.0358	0.637544	no
casp3b	NC_007125.6:4018224-4044292	control	10	OK	8.26208	21.986	1.41201	3.50817	0.0005	0.0436552	yes
casp9	NC_007134.6:25047232-25058731	control	10	OK	4.18473	9.75191	1.22055	3.35829	0.0012	0.0822993	no
caspb	NC_007112.6:57315227-57329039	control	10	OK	113.954	70.1557	-0.699825	-2.21151	0.0281	0.568191	no
casq1a	NC_007113.6:38057528-38072154	control	10	OK	68.4805	40.3356	-0.76364	-2.40715	0.0166	0.435675	no
cbr1l	NC_007132.6:21596579-21604558	control	10	OK	26.4689	99.0902	1.90445	6.11376	5e-05	0.00654421	yes
cbsb	NC_007120.6:9205231-9250904	control	10	OK	17.2268	36.912	1.09943	3.5887	0.0003	0.0297548	yes
cbx7a	NC_007114.6:24855596-24864069	control	10	OK	1.11014	7.05184	2.66726	6.07447	5e-05	0.00654421	yes
cc2d1b	NC_007113.6:19587435-19623745	control	10	OK	2.97282	5.37901	0.85551	2.51856	0.0112	0.344124	no
ccbe1	NC_007132.6:10485045-10584465	control	10	OK	1.90971	0.662557	-1.52723	-2.99693	0.00305	0.154537	no
ccl20a.3	NC_007113.6:45338050-45340014	control	10	OK	0	0.86331	inf	#NAME?	0.00055	0.0465129	yes
ccl34a.4	NC_007113.6:40326925-40327704	control	10	OK	2.5374	11.9955	2.24107	4.05023	0.00085	0.0639308	no
ccl34b.1	NC_007135.6:27318196-27320869	control	10	OK	10.1301	3.05401	-1.72987	-3.12889	0.00415	0.186041	no
ccpg1	NW_008805359.1:407-1156	control	10	OK	4.6375	12.7741	1.46181	2.13654	0.03745	0.650872	no
cd248a	NC_007118.6:18111922-18115006	control	10	OK	17.6405	8.68972	-1.02151	-3.2959	0.00135	0.0893488	no
cd248b,rce1b	NC_007132.6:26455425-26483949	control	10	OK	13.6986	6.89288	-0.990853	-3.12118	0.0017	0.104146	no
cdc42ep3	NC_007124.6:41997875-42017598	control	10	OK	14.3658	8.12694	-0.821854	-2.47446	0.01385	0.395844	no
cdh1	NC_007113.6:28906402-28951609	control	10	OK	4.02656	2.34272	-0.781363	-2.11191	0.0326	0.609872	no
cdh17	NC_007127.6:26900739-26929356	control	10	OK	7.29367	3.1779	-1.19857	-3.55877	0.0004	0.0363284	yes
cdhr1a	NC_007124.6:29350205-29375208	control	10	OK	0.914529	0.453426	-1.01216	-1.93918	0.0464	0.711578	no
cdkn1a	NC_007133.6:564661-570094	control	10	OK	4.2618	11.0601	1.37583	3.99904	5e-05	0.00654421	yes
ceacam1	NC_007127.6:11833300-11869691	control	10	OK	22.5032	9.84688	-1.19239	-3.8474	0.00015	0.0170511	yes
cebpg	NC_007118.6:37818445-37823929	control	10	OK	34.9709	8.86048	-1.9807	-6.33359	5e-05	0.00654421	yes
celsr1b	NC_007136.6:19655954-19770267	control	10	OK	3.12899	4.77797	0.610701	1.98775	0.03895	0.663761	no
cenpj	NC_007120.6:29761064-29769162	control	10	OK	1.81523	3.17444	0.806348	2.1476	0.02655	0.552813	no
cfi	NW_003336537.1:14446-42415	control	10	OK	39.1694	68.5303	0.807014	2.58639	0.01	0.325992	no
cfl2	NC_007128.6:9851026-9869190	control	10	OK	49.6062	26.3159	-0.914587	-2.96743	0.00385	0.177361	no
ch25h	NC_007123.6:16920882-16922000	control	10	OK	0.16149	1.41399	3.13025	3.36003	0.0448	0.703212	no
chac1	NC_007131.6:28367844-28370374	control	10	OK	124.058	214.249	0.788269	2.38561	0.0205	0.487592	no
chrna4b	NC_007122.6:12924600-12940741	control	10	OK	1.02497	0.379188	-1.43459	-2.37639	0.02775	0.564374	no
chrne	NC_007116.6:37839945-37851331	control	10	OK	18.2116	10.5392	-0.789088	-2.45591	0.01425	0.40154	no
ciapin1	NC_007136.6:14302244-14310326	control	10	OK	25.5595	49.9722	0.967268	3.10782	0.00165	0.102065	no
cilp	NC_007118.6:31154863-31170499	control	10	OK	10.7981	3.78449	-1.51261	-3.21873	0.0016	0.0998545	no
cilp2	NC_007133.6:18443915-18462825	control	10	OK	0.790123	0.37495	-1.07538	-2.29928	0.0255	0.541743	no
cipca	NC_007128.6:44642481-44649645	control	10	OK	2.60935	5.13505	0.976689	2.54333	0.0086	0.300948	no
ckmt2a	NC_007121.6:3061650-3079501	control	10	OK	26.3602	10.9457	-1.26799	-3.91596	5e-05	0.00654421	yes
ckmt2b	NC_007116.6:50947617-50962170	control	10	OK	106.966	53.6079	-0.99663	-3.21569	0.00085	0.0639308	no
clcn1	NC_007127.6:17568834-17633880	control	10	OK	2.73735	1.24348	-1.1384	-2.9371	0.00375	0.17436	no
clcn1a	NC_007130.6:9692271-9744116	control	10	OK	1.64577	0.759121	-1.11636	-2.47655	0.01335	0.387084	no
cldn11a	NC_007113.6:26341791-26345492	control	10	OK	19.0468	12.1069	-0.653718	-1.98589	0.04655	0.712008	no
cldn15a	NC_007118.6:20559125-20565196	control	10	OK	7.38232	3.98867	-0.888165	-2.18278	0.03245	0.608977	no
cldnb	NC_007132.6:25729106-25730235	control	10	OK	66.8909	102.658	0.617971	2.02417	0.04555	0.708002	no
cldnk	NC_007114.6:49088238-49092921	control	10	OK	3.39027	1.69705	-0.998373	-2.11593	0.03255	0.609425	no
clic5b	NC_007131.6:44028193-44074318	control	10	OK	9.52978	3.22796	-1.56182	-3.68375	0.00015	0.0170511	yes
clica	NC_007132.6:13566926-13575461	control	10	OK	19.3273	29.9665	0.632712	2.02371	0.0431	0.69539	no
clk4a	NC_007125.6:6627196-6637786	control	10	OK	52.2858	25.8705	-1.01511	-3.13459	0.00185	0.109875	no
cnga3a	NC_007117.6:38796396-38821512	control	10	OK	1.21096	0.613548	-0.980904	-2.1358	0.0289	0.577036	no
cnpy2	NC_007122.6:2471089-2479705	control	10	OK	11.5764	6.33534	-0.869686	-2.1315	0.02935	0.579086	no
cntn3a.2	NC_007134.6:11071013-11289788	control	10	OK	0.431995	0.92743	1.10222	2.18486	0.03015	0.586606	no
col10a1a	NC_007128.6:15534149-15538918	control	10	OK	65.3822	32.621	-1.0031	-3.20985	0.002	0.115075	no
col11a2	NC_007130.6:7254945-7306456	control	10	OK	45.5853	25.4815	-0.83912	-2.37622	0.01455	0.40672	no
col18a1	NC_007117.6:18618379-18682367	control	10	OK	2.55946	1.40068	-0.869714	-2.31033	0.022	0.503433	no
col27a1a	NC_007127.6:51876706-52012649	control	10	OK	9.13555	5.34852	-0.772351	-2.35639	0.01645	0.433037	no
col27a1a	NW_008805444.1:5527-7126	control	10	OK	9.72453	5.28103	-0.880808	-2.45575	0.0139	0.396464	no
col2a1a	NC_007119.6:21163256-21187389	control	10	OK	346.518	183.803	-0.914773	-1.93165	0.04775	0.719652	no
col5a2b	NC_007117.6:11203452-11260611	control	10	OK	1.49022	0.831621	-0.841526	-2.02499	0.0412	0.682364	no
col7a1	NC_007117.6:40187361-40314626	control	10	OK	5.76544	10.742	0.897758	2.88227	0.0035	0.167863	no
col7a1l,si:dkey-117n7.5	NC_007115.6:15870583-15976155	control	10	OK	5.50468	8.69633	0.659748	2.05902	0.02965	0.582216	no
col8a1a	NC_007120.6:30279900-30292806	control	10	OK	16.8936	7.88582	-1.09915	-3.44635	0.0008	0.0609558	no
col8a2	NC_007130.6:35906574-36009331	control	10	OK	11.1382	6.397	-0.800051	-2.54439	0.0089	0.306997	no
col9a1a	NC_007122.6:11291868-11317662	control	10	OK	91.38	46.3382	-0.979678	-3.12412	0.00235	0.128961	no
comtd1	NC_007124.6:17541534-17554359	control	10	OK	27.0133	16.0045	-0.755186	-2.28038	0.02205	0.504248	no
cox6b1	NC_007135.6:39718203-39722731	control	10	OK	109.018	62.6465	-0.799261	-2.59615	0.0105	0.330743	no
cox7a1	NC_007126.6:20467097-20470064	control	10	OK	9.09471	3.75584	-1.27589	-2.64666	0.00965	0.321772	no
cpb2	NC_007112.6:28955746-28959805	control	10	OK	11.1903	4.93392	-1.18144	-3.14463	0.0023	0.127013	no
cplx3b	NC_007129.6:5803480-5822435	control	10	OK	5.71086	3.09147	-0.885413	-2.23266	0.0188	0.465006	no
cplx4a	NC_007132.6:10647409-10657920	control	10	OK	3.73988	0.849005	-2.13915	-4.93601	5e-05	0.00654421	yes
cpox	NC_007119.6:18570522-18582826	control	10	OK	10.2512	5.14676	-0.994059	-2.89887	0.00455	0.197891	no
cps1	NC_007120.6:39217327-39327674	control	10	OK	0.880934	0.086434	-3.34936	-5.1425	0.00235	0.128961	no
cpz	NC_007112.6:40098793-40116111	control	10	OK	9.4407	5.14764	-0.874983	-2.66673	0.00795	0.287246	no
crabp1b	NC_007118.6:48047160-48069974	control	10	OK	17.7379	9.1809	-0.950128	-2.60226	0.0105	0.330743	no
crebrf	NC_007132.6:41156585-41191184	control	10	OK	1.42074	4.01649	1.49929	4.19051	5e-05	0.00654421	yes
crfb17	NC_007112.6:53182600-53203565	control	10	OK	2.95081	5.29001	0.842159	2.13011	0.0385	0.659786	no
crfb4	NC_007120.6:15996672-16125681	control	10	OK	1.51071	3.25402	1.107	2.43774	0.01365	0.39237	no
crispld1a	NC_007135.6:14709380-14741599	control	10	OK	1.60902	0.372824	-2.10962	-3.68629	0.00135	0.0893488	no
crmp1	NC_007112.6:13656628-13680626	control	10	OK	14.6165	9.19133	-0.669251	-1.98512	0.04255	0.693063	no
crtac1a	NC_007112.6:54256897-54269961	control	10	OK	1.62734	3.54971	1.12519	2.50403	0.0111	0.342705	no
cry1a	NC_007115.6:12014192-12027688	control	10	OK	11.6154	27.4791	1.2423	4.04211	5e-05	0.00654421	yes
cry1b	NC_007129.6:15138005-15161184	control	10	OK	3.98049	6.79299	0.771103	2.2916	0.0207	0.489079	no
cry3	NC_007136.6:13749475-13774893	control	10	OK	9.60142	17.8831	0.897279	2.77401	0.0046	0.19957	no
cry5	NC_007121.6:39338474-39362391	control	10	OK	1.10173	6.75136	2.61541	3.88591	0.00065	0.0528629	no
cryaa	NC_007112.6:28293074-28297086	control	10	OK	8.31556	1.14321	-2.86272	-5.97648	5e-05	0.00654421	yes
cryba1a	NC_007126.6:28153817-28161473	control	10	OK	1.34145	0.377532	-1.82913	-2.21956	0.04065	0.678879	no
cryba1b	NC_007132.6:39140708-39149628	control	10	OK	403.946	60.3381	-2.74302	-8.38518	5e-05	0.00654421	yes
cryba1l1	NC_007125.6:47316808-47333043	control	10	OK	433.718	115.448	-1.90951	-3.26938	0.0019	0.11087	no
cryba1l2	NC_007112.6:43720616-43733397	control	10	OK	3.81575	0.709271	-2.42756	-4.64453	0.00015	0.0170511	yes
cryba2a	NC_007117.6:13650772-13654197	control	10	OK	223.11	50.0996	-2.15489	-6.84393	5e-05	0.00654421	yes
cryba2b	NC_007120.6:11583155-11589233	control	10	OK	308.257	116.072	-1.40912	-4.46348	5e-05	0.00654421	yes
cryba4	NC_007121.6:44195372-44204669	control	10	OK	572.686	100.54	-2.50998	-7.68267	5e-05	0.00654421	yes
crybb1	NC_007121.6:44174426-44180594	control	10	OK	639.932	95.1262	-2.75	-8.20929	5e-05	0.00654421	yes
crybb1l1	NC_007125.6:47316808-47333043	control	10	OK	302.117	45.9915	-2.71567	-5.62286	5e-05	0.00654421	yes
crybb1l2	NC_007112.6:43738357-43745614	control	10	OK	389.014	106.831	-1.86449	-5.61506	5e-05	0.00654421	yes
crybb1l3	NC_007126.6:28163275-28171527	control	10	OK	1.7277	0.309468	-2.48099	-3.36082	0.01255	0.372053	no
crybb2	NC_007119.6:42622945-42629488	control	10	OK	0.780529	0.0633232	-3.62365	-2.29721	0.02055	0.487787	no
cry-dash	NC_007135.6:20049601-20063928	control	10	OK	4.6172	10.3898	1.17007	3.34969	0.0015	0.095747	no
crygm2d1	NC_007120.6:22527784-22528603	control	10	OK	386.941	164.062	-1.23787	-3.94397	0.00015	0.0170511	yes
crygm2d10	NC_007120.6:22499108-22499938	control	10	OK	541.907	117.321	-2.20758	-6.947	5e-05	0.00654421	yes
crygm2d12	NC_007120.6:22393909-22394698	control	10	OK	206.59	32.5185	-2.66744	-8.28809	5e-05	0.00654421	yes
crygm2d2	NC_007120.6:22506766-22507550	control	10	OK	413.972	252.002	-0.716098	-2.30053	0.0216	0.499174	no
crygm2d20	NC_007120.6:22401480-22402367	control	10	OK	312.321	68.1573	-2.19609	-7.03102	5e-05	0.00654421	yes
crygm2d21	NC_007120.6:22487376-22488543	control	10	OK	191.688	45.571	-2.07257	-6.61749	5e-05	0.00654421	yes
crygm2d3	NC_007120.6:22469851-22470581	control	10	OK	374.487	75.3632	-2.31298	-7.38152	5e-05	0.00654421	yes
crygm2d4	NC_007120.6:22433769-22434582	control	10	OK	192.756	51.793	-1.89595	-6.06046	5e-05	0.00654421	yes
crygm2d5,crygm2d9	NC_007120.6:22421123-22429183	control	10	OK	375.181	91.9096	-2.0293	-6.14077	5e-05	0.00654421	yes
crygm2d7	NC_007120.6:22460416-22461192	control	10	OK	402.54	156.982	-1.35854	-4.36664	5e-05	0.00654421	yes
crygm2d8	NC_007120.6:22280286-22377137	control	10	OK	457.713	83.8562	-2.44846	-2.62539	0.00975	0.323873	no
crygm2f,crygm5	NC_007120.6:22533723-22541402	control	10	OK	8.54693	2.30703	-1.88937	-3.78421	0.00035	0.0331638	yes
crygmx	NC_007123.6:30723264-30726741	control	10	OK	56.1858	6.72743	-3.06208	-8.13948	5e-05	0.00654421	yes
crygmxl2	NC_007123.6:30727774-30731153	control	10	OK	285.42	74.2306	-1.943	-6.17049	5e-05	0.00654421	yes
crygn2	NC_007135.6:41441059-41448990	control	10	OK	279.978	45.3711	-2.62547	-8.2725	5e-05	0.00654421	yes
csf3	NC_007123.6:10593232-10600842	control	10	OK	0.748854	2.29087	1.61314	3.0038	0.00165	0.102065	no
csgalnact1	NC_007121.6:8338229-8431027	control	10	OK	5.17763	3.01576	-0.779771	-2.36111	0.0175	0.447717	no
csrnp3	NC_007120.6:49961743-50065599	control	10	OK	3.65322	6.20443	0.76413	2.19204	0.0259	0.545278	no
cst14b.1	NC_007116.6:4081460-4092016	control	10	OK	84.1032	142.729	0.763047	2.34335	0.01625	0.430198	no
ctgfb	NC_007130.6:13939298-13946531	control	10	OK	2.78863	1.52484	-0.870897	-2.08699	0.03355	0.618229	no
ctsba	NC_007128.6:32670391-32704227	control	10	OK	76.2998	144.352	0.919841	2.69018	0.0061	0.241459	no
ctsc	NC_007126.6:43682907-43704472	control	10	OK	8.48044	13.8817	0.71097	2.26132	0.0196	0.47638	no
ctsd	NC_007129.6:16144538-16157015	control	10	OK	140.85	342.189	1.28064	3.66117	0.00055	0.0465129	yes
ctsla	NC_007116.6:44204646-44210762	control	10	OK	36.0272	20.6401	-0.803637	-2.56411	0.00885	0.306026	no
ctssb.1	NC_007127.6:29574503-29578811	control	10	OK	4.22613	10.6954	1.33958	3.40532	0.00175	0.106095	no
cux2a	NW_003334319.1:155023-176143	control	10	OK	1.90728	0.74571	-1.35483	-2.68192	0.0136	0.391898	no
cx23	NC_007131.6:37391274-37395395	control	10	OK	4.62665	1.63495	-1.50072	-3.38693	0.00125	0.085062	no
cx28.6	NC_007128.6:14699557-14706466	control	10	OK	0.738113	1.86555	1.33769	2.14158	0.02365	0.521589	no
cx28.9	NC_007131.6:40847643-40853838	control	10	OK	1.4274	0.444863	-1.68196	-2.51573	0.0123	0.366503	no
cx44.1	NC_007112.6:46754816-46758524	control	10	OK	1.2716	0.181446	-2.80903	-4.15309	0.0049	0.208073	no
cx50.5	NC_007120.6:30619429-30622718	control	10	OK	0.599738	0.156607	-1.93719	-2.57225	0.0147	0.40782	no
cxcl18b	NC_007112.6:48578148-48581339	control	10	OK	3.08588	13.6977	2.15017	4.17902	0.00085	0.0639308	no
cxcl8a	NC_007112.6:13566645-13567613	control	10	OK	3.39006	10.0493	1.56771	3.1201	0.00395	0.179955	no
cxcr4a	NC_007117.6:12687258-12688869	control	10	OK	3.47863	9.26085	1.41263	3.65815	0.0004	0.0363284	yes
cyb561a3b	NC_007132.6:16006987-16026315	control	10	OK	1.2898	4.93004	1.93445	4.27613	0.0002	0.0215787	yes
cybrd1	NC_007120.6:3516178-3525019	control	10	OK	3.41443	7.04284	1.04451	2.11198	0.02915	0.578071	no
cyp11c1	NC_007127.6:54639246-54653913	control	10	OK	2.35122	0.80973	-1.53789	-2.70838	0.0083	0.295471	no
cyp1b1	NC_007124.6:41885314-41892978	control	10	OK	2.31582	1.18511	-0.966506	-2.29239	0.02355	0.520202	no
cyp1c1	NW_003336436.1:103569-106641	control	10	OK	3.54266	1.16342	-1.60646	-3.91919	0.00055	0.0465129	yes
cyp1c2	NC_007128.6:794441-796630	control	10	OK	2.48147	0.516417	-2.26459	-4.24605	0.0008	0.0609558	no
cyp24a1	NC_007117.6:55869079-55881493	control	10	OK	1.2334	3.89959	1.66069	3.74972	0.00045	0.0399878	yes
cyp2x9	NC_007136.6:17300335-17307177	control	10	OK	0.758476	0.201007	-1.91585	-2.43056	0.0454	0.707555	no
cyp4v8	NC_007112.6:17207392-17219708	control	10	OK	3.10101	1.53803	-1.01165	-2.40624	0.0194	0.474152	no
cyp51	NC_007130.6:598804-617395	control	10	OK	7.9837	12.8418	0.685719	2.15349	0.029	0.577879	no
cyp8b1	NC_007113.6:3588790-3612518	control	10	OK	2.15215	0.495119	-2.11993	-3.59688	0.0017	0.104146	no
cyr61l1	NC_007116.6:32314174-32319996	control	10	OK	1.73604	3.19554	0.880257	1.98223	0.0495	0.72864	no
dab2	NC_007116.6:31723621-31738735	control	10	OK	9.77789	5.7503	-0.765886	-2.31171	0.0174	0.4463	no
dao.1	NC_007116.6:19684076-19691577	control	10	OK	23.9843	3.17777	-2.916	-7.92444	5e-05	0.00654421	yes
dcakd	NC_007135.6:36908557-36915261	control	10	OK	3.78962	1.8153	-1.06185	-2.32452	0.0197	0.477485	no
ddb2,kbtbd4	NC_007129.6:20479090-20502143	control	10	OK	5.78394	9.6329	0.735918	2.00964	0.0389	0.663394	no
ddc	NC_007127.6:8384812-8429020	control	10	OK	1.16664	0.490599	-1.24974	-2.6147	0.01445	0.405544	no
ddr2	NC_007113.6:7088679-7125303	control	10	OK	3.95903	1.86878	-1.08305	-2.8132	0.00495	0.209942	no
ddx21	NC_007124.6:189373-199748	control	10	OK	44.6761	68.7826	0.62254	1.99277	0.04855	0.726076	no
ddx4	NC_007121.6:6925410-6946888	control	10	OK	0.303863	0.678676	1.1593	1.83536	0.0472	0.716783	no
desi1b	NC_007123.6:18772113-18776618	control	10	OK	6.98635	18.2393	1.38444	3.913	0.00015	0.0170511	yes
dhrs12	NC_007120.6:23997740-24001767	control	10	OK	9.32172	14.792	0.666145	2.02195	0.0441	0.701336	no
dhrs13l1	NC_007125.6:4044399-4054787	control	10	OK	7.77761	52.1437	2.74509	8.34108	5e-05	0.00654421	yes
dhrs7cb	NC_007123.6:449610-458268	control	10	OK	52.3441	32.5084	-0.687212	-2.24855	0.0224	0.508598	no
diablob	NC_007132.6:21486445-21491341	control	10	OK	17.4306	27.1237	0.63793	1.98185	0.0475	0.718804	no
dnajc16	NC_007134.6:37380000-37413603	control	10	OK	1.35355	2.48836	0.878442	1.96798	0.03945	0.667409	no
dnajc3a	NC_007120.6:29673299-29687139	control	10	OK	12.2604	7.80614	-0.651326	-1.98049	0.0476	0.718804	no
dnase1l3l	NC_007119.6:25332843-25338120	control	10	OK	5.51639	1.77117	-1.63902	-3.32956	0.0038	0.1761	no
dnm3a	NC_007131.6:14922891-15029368	control	10	OK	2.73584	1.10285	-1.31075	-2.59046	0.0101	0.326244	no
dok7	NC_007112.6:40440548-40489315	control	10	OK	3.90138	2.1048	-0.890301	-2.20594	0.0324	0.608732	no
dpys	NC_007127.6:44333823-44360764	control	10	OK	1.39549	0.419796	-1.73301	-3.20251	0.00465	0.200992	no
drd3	NC_007135.6:20822681-20861900	control	10	OK	2.08685	1.0525	-0.987508	-2.07997	0.03675	0.645248	no
drd4-rs	NC_007115.6:19961173-20038595	control	10	OK	2.02669	0.984163	-1.04216	-2.12423	0.0342	0.624455	no
dsg2.1	NC_007131.6:7337736-7361520	control	10	OK	11.5244	19.9685	0.793028	2.57672	0.00965	0.321772	no
dspa	NC_007113.6:1767569-1819938	control	10	OK	10.0013	18.693	0.902312	2.86725	0.0038	0.1761	no
dtnba	NC_007131.6:47412294-47470477	control	10	OK	30.5085	20.0533	-0.605369	-1.93163	0.04755	0.718804	no
dtnbp1b	NC_007130.6:26577290-26651007	control	10	OK	6.80759	3.76106	-0.856006	-1.98004	0.0417	0.687535	no
dub	NC_007132.6:22881375-22915032	control	10	OK	6.79109	3.91465	-0.794761	-1.98794	0.04405	0.701336	no
dusp2	NC_007119.6:40589743-40593724	control	10	OK	2.47115	4.79998	0.957843	2.43364	0.01875	0.465006	no
dusp3b	NC_007114.6:34553638-34558706	control	10	OK	0.697158	0.136365	-2.35401	-1.42914	0.04595	0.710277	no
dusp5	NC_007133.6:29962130-29973677	control	10	OK	5.06295	11.6409	1.20116	3.33535	0.0013	0.0873607	no
eef2k	NC_007123.6:10344113-10372609	control	10	OK	32.7528	21.3645	-0.616407	-1.96372	0.0454	0.707555	no
egln1b	NC_007122.6:31295049-31340446	control	10	OK	18.1971	9.32685	-0.964248	-3.00341	0.0023	0.127013	no
egln2	NC_007126.6:8359663-8413064	control	10	OK	3.79822	1.31833	-1.52661	-4.46187	5e-05	0.00654421	yes
elna	NC_007126.6:353747-413650	control	10	OK	0.876355	0.417156	-1.07093	-2.32297	0.0042	0.187442	no
elovl4b	NC_007134.6:40517863-40545677	control	10	OK	15.0266	7.27344	-1.04681	-3.28177	0.0013	0.0873607	no
emilin3	NC_007134.6:4147610-4176042	control	10	OK	5.1748	3.17826	-0.703267	-2.10553	0.0319	0.604856	no
enpp2	NC_007127.6:9718792-9771342	control	10	OK	2.95521	1.62137	-0.866049	-2.08566	0.03255	0.609425	no
entpd5a	NC_007128.6:44916645-44926777	control	10	OK	2.42708	0.693852	-1.80652	-4.00503	0.00025	0.0256683	yes
epb41b	NC_007127.6:26573847-26614837	control	10	OK	4.70822	8.5475	0.86032	2.73239	0.0051	0.213715	no
epd	NC_007116.6:37237091-37239157	control	10	OK	20.1072	4.27497	-2.23372	-5.48098	0.0001	0.0119493	yes
epdl2	NC_007132.6:28476363-28487999	control	10	OK	32.0168	52.0607	0.701368	2.29837	0.0236	0.520978	no
epha2a	NC_007117.6:45872712-45903818	control	10	OK	5.73267	10.2787	0.842374	2.67724	0.007	0.264666	no
ephb1	NC_007113.6:46428081-46876783	control	10	OK	1.37158	2.28236	0.734689	1.94223	0.0451	0.706338	no
eppk1	NC_007130.6:22778959-22802804	control	10	OK	0.655176	1.21443	0.890332	2.65545	0.00885	0.306026	no
eprs	NC_007128.6:39750035-39792409	control	10	OK	24.0834	41.4852	0.784555	2.43305	0.01525	0.41486	no
erbb4a	NC_007112.6:6403067-6403374	control	10	OK	1.81128	0.359034	-2.33482	-1.41749	0.04595	0.710277	no
erc1b	NC_007115.6:8204573-8517750	control	10	OK	1.49091	2.45578	0.719988	1.89043	0.04885	0.726864	no
esm1	NC_007132.6:9894579-9898869	control	10	OK	2.20957	6.11988	1.46974	3.36684	0.0012	0.0822993	no
ethe1	NC_007127.6:54443598-54462194	control	10	OK	11.0263	36.8098	1.73914	5.30252	5e-05	0.00654421	yes
etnppl	NC_007118.6:59773931-59787077	control	10	OK	10.7296	3.58985	-1.5796	-4.29172	5e-05	0.00654421	yes
ets2	NC_007121.6:187808-196598	control	10	OK	10.8811	19.4073	0.83477	2.66485	0.0082	0.293703	no
evpla	NC_007117.6:17959278-17983457	control	10	OK	13.583	22.2196	0.710033	2.2647	0.0229	0.514116	no
exoc3l1	NC_007136.6:14329431-14337641	control	10	OK	4.50229	2.7425	-0.715167	-1.96836	0.04635	0.711578	no
eya4	NC_007134.6:31513128-31586066	control	10	OK	14.7755	9.46347	-0.64277	-2.01008	0.04025	0.674749	no
fads2	NC_007136.6:4007829-4023060	control	10	OK	2.49326	5.34322	1.09968	2.66941	0.01005	0.326244	no
fah	NC_007118.6:10424672-10447782	control	10	OK	11.9394	26.653	1.15856	3.70321	0.00015	0.0170511	yes
fam210b	NC_007117.6:59355009-59361827	control	10	OK	7.98264	15.4179	0.949664	2.77319	0.00545	0.223565	no
fam222a	NC_007116.6:19153435-19250879	control	10	OK	7.99042	5.07349	-0.655293	-2.00094	0.0381	0.656789	no
fam46bb	NC_007130.6:14669647-14684052	control	10	OK	5.50018	2.96236	-0.892732	-2.52643	0.01265	0.372965	no
fancm	NW_008805474.1:2082-3000	control	10	OK	2.66007	0.618934	-2.10361	-2.47096	0.0435	0.699265	no
fank1	NC_007123.6:44753228-44771284	control	10	OK	0.319786	1.05636	1.72393	2.53748	0.0247	0.533817	no
fap	NC_007120.6:51693830-51730149	control	10	OK	12.7506	8.20261	-0.636405	-2.05032	0.0416	0.686856	no
fasn	NC_007123.6:33294635-33349509	control	10	OK	2.12088	3.44251	0.6988	2.22334	0.02295	0.514414	no
fat1a	NC_007112.6:16681827-16830081	control	10	OK	5.50296	9.039	0.715955	2.29619	0.01765	0.450075	no
fat2	NC_007125.6:25806139-25879903	control	10	OK	1.53289	2.71379	0.824053	2.62346	0.00815	0.29251	no
fbln7	NC_007124.6:47461224-47510332	control	10	OK	2.4836	1.14746	-1.11398	-2.57879	0.00845	0.298383	no
fbp2	NC_007116.6:44213836-44229549	control	10	OK	21.4893	10.3621	-1.0523	-3.11796	0.00185	0.109875	no
fbxo40.2	NC_007132.6:22694682-22700696	control	10	OK	3.68089	2.10484	-0.806345	-2.08944	0.03275	0.611045	no
fech	NC_007132.6:1619927-1653643	control	10	OK	1.10058	3.7933	1.78518	3.55852	0.001	0.0721887	no
fgd5	NC_007117.6:40478243-40502799	control	10	OK	0.643228	0.307102	-1.06661	-2.07535	0.04625	0.711578	no
fgf6b	NC_007115.6:5172160-5174757	control	10	OK	3.75826	0.755396	-2.31476	-3.10932	0.01795	0.453432	no
fgfbp2b	NC_007112.6:21995210-22000443	control	10	OK	98.0714	45.9678	-1.09321	-3.5329	0.0004	0.0363284	yes
fgfrl1b	NC_007125.6:41233087-41311602	control	10	OK	7.14565	4.5267	-0.658606	-2.01577	0.0451	0.706338	no
fkbp7	NC_007120.6:42926479-42928828	control	10	OK	37.5864	23.0772	-0.703742	-2.19137	0.0294	0.579582	no
flnca	NC_007136.6:34515031-34536110	control	10	OK	1.83718	3.38274	0.880701	2.70562	0.0067	0.25693	no
fn1b	NC_007112.6:4806325-4845281	control	10	OK	14.2706	49.4035	1.79157	5.31563	5e-05	0.00654421	yes
fndc7	NC_007113.6:45691659-45717445	control	10	OK	2.17659	1.12117	-0.957057	-2.16262	0.02915	0.578071	no
fnip1	NC_007132.6:45468160-45510949	control	10	OK	4.35662	6.65455	0.611133	1.93177	0.0472	0.716783	no
fos	NC_007131.6:46648590-46650704	control	10	OK	12.0563	32.0929	1.41246	4.49159	5e-05	0.00654421	yes
fosl1a	NC_007125.6:30399157-30407475	control	10	OK	1.53328	18.0096	3.55407	9.12445	5e-05	0.00654421	yes
foxq1a	NC_007113.6:848412-849804	control	10	OK	12.663	19.7048	0.637928	1.96987	0.04945	0.728363	no
foxq1b	NC_007131.6:26784849-26786305	control	10	OK	3.13768	6.09986	0.959077	2.32217	0.0244	0.530444	no
fpgs	NC_007132.6:6009200-6028982	control	10	OK	6.92243	11.2369	0.698888	2.18257	0.03145	0.601043	no
fras1	NC_007116.6:38237006-38486624	control	10	OK	3.48514	5.30928	0.607297	1.95328	0.0464	0.711578	no
frem2a	NC_007121.6:26020616-26153740	control	10	OK	1.82768	3.74018	1.0331	3.23219	0.0011	0.0774124	no
frem2b	NC_007126.6:32578409-32738153	control	10	OK	4.12013	6.69608	0.700626	2.28365	0.0213	0.496006	no
frzb	NC_007120.6:45031016-45037738	control	10	OK	2.92634	1.32864	-1.13914	-2.67066	0.0097	0.322978	no
fscn2b	NC_007123.6:34337559-34370667	control	10	OK	3.89815	2.04556	-0.930298	-2.0375	0.0377	0.653271	no
fth1a	NC_007118.6:12675256-12683988	control	10	OK	615.802	1122.23	0.865836	2.18915	0.02575	0.543755	no
g6pd	NC_007134.6:14088813-14118717	control	10	OK	10.7833	24.1376	1.16249	3.60892	0.00015	0.0170511	yes
gabpa	NC_007120.6:35205356-35216334	control	10	OK	22.0728	34.609	0.648881	2.09227	0.0304	0.589831	no
gadd45aa	NC_007113.6:10497067-10500973	control	10	OK	5.53316	10.0605	0.862523	2.28114	0.02445	0.530543	no
gadd45ba	NC_007122.6:6446306-6447909	control	10	OK	15.3402	30.8036	1.00578	3.17178	0.00175	0.106095	no
gadd45bb	NC_007113.6:36957483-36959531	control	10	OK	5.26334	9.17602	0.801891	2.07208	0.0439	0.701336	no
gata6	NC_007113.6:4366036-4377377	control	10	OK	8.01384	12.6738	0.661282	2.01921	0.03935	0.666362	no
gc	NC_007116.6:45077667-45124683	control	10	OK	1.75675	0.243888	-2.84862	-3.91729	0.00645	0.250498	no
gc3	NC_007116.6:37522650-37614210	control	10	OK	0.618483	1.54767	1.3233	2.0776	0.03895	0.663761	no
gcga	NC_007133.6:11585388-11596336	control	10	OK	4.39981	7.81588	0.828968	2.02477	0.04255	0.693063	no
gch1	NC_007128.6:15115984-15141330	control	10	OK	3.81519	7.34355	0.944723	2.32374	0.013	0.381197	no
gck	NC_007119.6:40437678-40450994	control	10	OK	0.935389	0.320665	-1.5445	-2.371	0.03015	0.586606	no
gclc	NC_007124.6:2261360-2296362	control	10	OK	9.82013	23.3178	1.24762	4.064	5e-05	0.00654421	yes
gclm	NC_007119.6:15231632-15239547	control	10	OK	14.7983	25.779	0.80076	2.55614	0.0088	0.305504	no
gdf5	NC_007117.6:52639094-52645767	control	10	OK	2.3782	0.999219	-1.251	-2.70641	0.0089	0.306997	no
gfap	NC_007114.6:31660726-31673097	control	10	OK	85.238	45.7251	-0.898512	-2.83945	0.00365	0.171648	no
ggctb	NC_007127.6:53902185-54096789	control	10	OK	26.9176	12.3233	-1.12717	-2.31302	0.02015	0.484534	no
gja3	NC_007120.6:21594770-21600540	control	10	OK	0.868016	0.253218	-1.77734	-2.77479	0.00735	0.273179	no
gldn	NC_007129.6:39668563-39682418	control	10	OK	1.18022	0.539939	-1.12819	-2.05406	0.03495	0.630911	no
glmnb	NC_007117.6:28979443-28990331	control	10	OK	2.9766	1.45157	-1.03605	-2.25231	0.02495	0.535748	no
glra4a	NC_007125.6:38661800-38734378	control	10	OK	13.5228	7.69289	-0.813795	-2.56149	0.00925	0.313359	no
glrx	NC_007132.6:11686199-11728152	control	10	OK	54.4938	103.69	0.928114	2.84148	0.0039	0.178373	no
glt8d2	NC_007115.6:9842999-9851364	control	10	OK	1.22873	0.434248	-1.50057	-2.21244	0.0282	0.568571	no
gmpr	NC_007130.6:32885163-32900418	control	10	OK	26.0134	15.113	-0.783462	-2.51882	0.0103	0.326499	no
gnat2	NC_007119.6:25170861-25216514	control	10	OK	9.12209	1.54695	-2.55994	-3.54724	0.00065	0.0528629	no
gnb3b	NC_007130.6:5189739-5209177	control	10	OK	7.76033	0.82552	-3.23274	-6.63538	5e-05	0.00654421	yes
gng13b	NC_007114.6:35459703-35472707	control	10	OK	56.2544	36.6559	-0.617919	-2.01784	0.0451	0.706338	no
gngt2b	NC_007123.6:3420164-3423374	control	10	OK	48.2015	6.77994	-2.82973	-6.92681	5e-05	0.00654421	yes
gnmt	NC_007128.6:48885681-48899794	control	10	OK	35.5336	55.9556	0.655096	2.13865	0.0286	0.573663	no
gnsb	NC_007121.6:45184723-45201436	control	10	OK	6.28796	11.6235	0.886383	2.66924	0.00525	0.217527	no
gpc2	NC_007125.6:159532-169324	control	10	OK	9.38726	5.86288	-0.679094	-2.11864	0.02925	0.578416	no
gpd1a	NC_007119.6:6989512-7008945	control	10	OK	12.1894	7.59181	-0.68311	-1.96997	0.0486	0.726076	no
gpib	NC_007129.6:512819-534703	control	10	OK	34.0055	19.5984	-0.795031	-2.59518	0.0114	0.349196	no
gpr17	NC_007117.6:28124821-28139533	control	10	OK	3.00459	1.79249	-0.745203	-2.09129	0.0317	0.603679	no
gpr182	NC_007134.6:36530914-36533179	control	10	OK	4.75503	2.34953	-1.01708	-2.33433	0.02475	0.534238	no
gpr34a	NW_003334505.1:3656-4293	control	10	OK	0.871132	0	#NAME?	#NAME?	0.0007	0.0554481	no
gpr64	NC_007135.6:25139738-25156588	control	10	OK	0.936991	1.86286	0.991414	2.32964	0.02025	0.485106	no
gpr84	NC_007117.6:39116795-39121606	control	10	OK	0.247442	1.50266	2.60236	3.62948	0.00485	0.206702	no
gpt2	NC_007118.6:41607082-41621627	control	10	OK	11.7779	18.857	0.679026	1.93439	0.0434	0.698942	no
gpx1a	NC_007122.6:35780280-35894996	control	10	OK	39.6212	91.4813	1.2072	2.13838	0.0328	0.611489	no
gpx4a	NC_007133.6:17564629-17572002	control	10	OK	277.252	486.863	0.812319	2.39945	0.01435	0.403222	no
gra	NC_007127.6:16314416-16318243	control	10	OK	0.670976	1.58697	1.24194	2.26488	0.0325	0.608977	no
gria3a	NC_007116.6:22848551-22925725	control	10	OK	9.36636	4.20902	-1.154	-3.46752	0.00035	0.0331638	yes
grifin	NC_007114.6:41644002-41649320	control	10	OK	5.54969	1.60456	-1.79023	-3.02686	0.00875	0.304675	no
grin3a	NC_007121.6:4255639-4292904	control	10	OK	0.836643	0.41753	-1.00273	-2.01883	0.04955	0.729069	no
grinaa	NC_007130.6:46667334-46713482	control	10	OK	8.97163	15.4792	0.786888	2.35177	0.0146	0.407143	no
grk7a	NC_007113.6:16867905-16875571	control	10	OK	2.21124	0.532447	-2.05414	-4.26253	0.00025	0.0256683	yes
grna	NC_007114.6:29783584-29810515	control	10	OK	0.465721	1.08845	1.22473	2.22882	0.01065	0.333965	no
gsr	NC_007125.6:38512654-38532816	control	10	OK	11.1347	70.7586	2.66784	8.35631	5e-05	0.00654421	yes
gss	NC_007134.6:14987009-15013385	control	10	OK	3.62493	8.13389	1.16599	3.20683	0.0019	0.11087	no
gsto2	NC_007124.6:25266501-25272311	control	10	OK	39.0744	96.7595	1.30818	4.25398	5e-05	0.00654421	yes
gstp1	NC_007125.6:3399998-3406739	control	10	OK	478.895	2197.16	2.19786	5.32929	5e-05	0.00654421	yes
gstp2	NC_007125.6:3388235-3396243	control	10	OK	4.30422	29.8401	2.79343	6.58118	5e-05	0.00654421	yes
gstz1	NC_007128.6:44992615-45000041	control	10	OK	11.7571	19.2813	0.713672	1.95662	0.0445	0.701805	no
gtf3c2	NC_007131.6:38640454-38682832	control	10	OK	2.47369	4.3071	0.800052	2.34952	0.0164	0.432371	no
gtpbp1	NC_007114.6:33308838-33328050	control	10	OK	18.673	35.604	0.931089	3.03025	0.00175	0.106095	no
gtpbp2	NC_007124.6:729085-744087	control	10	OK	11.2941	20.7858	0.880037	1.88665	0.0271	0.558946	no
gucy1a3	NC_007112.6:25092793-25108222	control	10	OK	2.42867	1.17944	-1.04206	-2.30736	0.0212	0.494994	no
guk1b	NC_007119.6:18195235-18203815	control	10	OK	8.40454	2.91134	-1.52949	-3.60333	0.00065	0.0528629	no
gypc	NC_007120.6:23854884-23908852	control	10	OK	8.03293	3.99533	-1.00761	-2.91517	0.0033	0.161479	no
gys1	NC_007114.6:16572426-16611135	control	10	OK	25.1131	12.4675	-1.01027	-2.89325	0.00385	0.177361	no
h1fx	NC_007117.6:40772749-40774061	control	10	OK	43.9066	78.1668	0.832117	2.71931	0.00775	0.282498	no
haao	NC_007124.6:8622629-8651559	control	10	OK	9.53273	3.96377	-1.26602	-3.11475	0.002	0.115075	no
habp2	NC_007123.6:31598296-31604803	control	10	OK	5.11473	2.14843	-1.25138	-3.01515	0.0026	0.138133	no
hagh	NC_007114.6:18624768-18642811	control	10	OK	14.7602	31.5489	1.09588	3.46019	0.00095	0.0695108	no
hamp	NC_007127.6:50687695-50696684	control	10	OK	3.12455	6.77739	1.11708	2.15899	0.02925	0.578416	no
hao2	NC_007120.6:21335971-21353748	control	10	OK	14.1652	8.84461	-0.679479	-2.06756	0.0342	0.624455	no
hbbe1.1	NC_007114.6:54859509-54860272	control	10	OK	1605.45	2921.95	0.863954	2.11273	0.0312	0.597734	no
hbbe3	NC_007123.6:20217594-20218669	control	10	OK	35.7444	325.495	3.18685	9.65734	5e-05	0.00654421	yes
hbegfa	NC_007125.6:6742265-6745213	control	10	OK	10.2201	17.5899	0.783348	2.44472	0.01665	0.43617	no
hbp1	NC_007136.6:3325104-3345176	control	10	OK	11.4813	20.8554	0.861132	2.68876	0.00515	0.215295	no
he1a,he1b	NC_007133.6:14059258-14090539	control	10	OK	32.748	93.6031	1.51515	3.38482	0.00105	0.0749482	no
hebp2	NC_007131.6:30990442-30998122	control	10	OK	13.6313	39.924	1.55033	4.81287	5e-05	0.00654421	yes
heg	NC_007120.6:38875075-38897715	control	10	OK	2.92052	1.62104	-0.849311	-2.33174	0.02195	0.502782	no
hephl1	NC_007126.6:2457966-2509455	control	10	OK	2.41243	4.25339	0.818125	2.43279	0.0118	0.357229	no
hgd	NC_007135.6:23814377-23825872	control	10	OK	11.4418	18.0605	0.65852	2.04533	0.0403	0.675264	no
hgfa	NC_007115.6:19721672-19895193	control	10	OK	8.11262	4.957	-0.7107	-2.13741	0.0227	0.511897	no
hhatla	NC_007113.6:21679750-21693997	control	10	OK	94.6749	51.5573	-0.876807	-2.80239	0.0046	0.19957	no
hic1	NC_007126.6:25745778-25757375	control	10	OK	3.67719	2.19904	-0.741727	-2.00133	0.0403	0.675264	no
hif1an	NC_007124.6:29822182-29849765	control	10	OK	15.3366	9.73036	-0.656419	-2.08228	0.038	0.655711	no
higd1a	NC_007113.6:1825740-1830943	control	10	OK	18.7307	58.4141	1.64091	5.28051	5e-05	0.00654421	yes
hip1rb	NC_007116.6:65684301-65750253	control	10	OK	5.31439	8.27418	0.638713	1.94165	0.0454	0.707555	no
histh1l	NC_007116.6:26832825-26834198	control	10	OK	168.613	337.177	0.999789	2.95344	0.0045	0.196082	no
hivep1	NC_007130.6:3445235-3547631	control	10	OK	1.56263	3.01733	0.949295	2.88774	0.0025	0.13435	no
hk2	NC_007116.6:13370122-13503998	control	10	OK	3.31798	5.29695	0.674855	1.9714	0.0499	0.731759	no
hkdc1	NC_007124.6:22887047-22901389	control	10	OK	2.21131	4.10337	0.891911	2.44193	0.0171	0.442823	no
hm:zewp0073	NC_007130.6:47988577-47994969	control	10	OK	49.9127	27.5964	-0.854926	-2.78864	0.0066	0.254349	no
hmbsb	NC_007126.6:23576081-23587957	control	10	OK	6.21368	11.7609	0.920482	2.85577	0.004	0.181524	no
hmgcra	NC_007116.6:50326152-50346149	control	10	OK	2.52017	6.39752	1.34399	3.89233	5e-05	0.00654421	yes
hmox1a	NC_007114.6:25880610-25886721	control	10	OK	11.2581	21.3291	0.921862	2.83864	0.0059	0.237026	no
hoxa9a	NC_007130.6:20177149-20179188	control	10	OK	7.23057	4.31594	-0.744435	-2.01901	0.04415	0.701336	no
hoxb10a	NC_007114.6:23538275-23541589	control	10	OK	5.70036	3.05887	-0.898056	-2.38323	0.0212	0.494994	no
hoxb8a	NC_007114.6:23557304-23560102	control	10	OK	19.0259	12.0705	-0.656481	-2.07786	0.03235	0.608609	no
hoxb9a	NC_007114.6:23546774-23551888	control	10	OK	16.8633	10.4261	-0.693689	-1.94973	0.0448	0.703212	no
hoxc12a	NC_007134.6:35964769-35968247	control	10	OK	11.3446	6.5499	-0.792462	-2.1431	0.02345	0.519468	no
hoxd10a	NC_007120.6:1966908-1978532	control	10	OK	7.79732	4.28713	-0.862965	-1.98327	0.04665	0.712759	no
hrasls	NC_007122.6:45044043-45048322	control	10	OK	8.67719	1.68026	-2.36855	-4.33879	0.0001	0.0119493	yes
hsc70	NC_007126.6:37934330-37949391	control	10	OK	24.9648	16.028	-0.639301	-2.07741	0.03145	0.601043	no
hsd17b12a	NC_007136.6:29753047-29787552	control	10	OK	13.6884	28.1148	1.03837	3.3489	0.00095	0.0695108	no
hsd17b14	NC_007114.6:29838302-29846613	control	10	OK	5.28928	8.50271	0.684852	2.0075	0.04705	0.715436	no
hsp70	NC_007114.6:25992846-25996113	control	10	OK	13.8052	34.2454	1.3107	4.27147	5e-05	0.00654421	yes
hsp70.2	NC_007114.6:25988736-25991541	control	10	OK	12.3497	21.6679	0.811087	2.61896	0.0102	0.326244	no
hsp70l	NC_007119.6:4741890-4744644	control	10	OK	4.12475	17.2797	2.0667	6.11031	5e-05	0.00654421	yes
hsp90aa1.1,hsp90aa1.2	NC_007131.6:54177898-54206788	control	10	OK	83.3093	145.138	0.800874	2.35782	0.01495	0.411172	no
hsp90b1	NC_007115.6:9835592-9842920	control	10	OK	126.387	69.1601	-0.869837	-2.63182	0.00825	0.294589	no
hspa5	NC_007116.6:2440678-2448587	control	10	OK	176.525	110.717	-0.672992	-1.98074	0.04995	0.731879	no
hspb1	NC_007116.6:3238392-3244467	control	10	OK	33.9064	70.9677	1.06561	3.45464	0.00075	0.0584825	no
hspb11	NC_007132.6:20347318-20348242	control	10	OK	10.2108	33.9746	1.73437	4.9702	5e-05	0.00654421	yes
hspb9	NC_007114.6:33168823-33169482	control	10	OK	11.0266	46.291	2.06974	5.62948	5e-05	0.00654421	yes
htatip2	NC_007118.6:16844338-16851210	control	10	OK	12.2441	30.4352	1.31366	4.0105	5e-05	0.00654421	yes
hyou1	NC_007121.6:29883890-29905126	control	10	OK	20.3978	12.9225	-0.658535	-2.14475	0.03275	0.611045	no
iars	NC_007122.6:1308227-1365873	control	10	OK	15.2527	29.3161	0.942631	2.94154	0.00315	0.156879	no
ier2	NC_007114.6:33629940-33631106	control	10	OK	21.1639	47.2543	1.15884	3.70402	0.0001	0.0119493	yes
ier2	NC_007122.6:30791747-30792260	control	10	OK	16.4154	32.4149	0.981604	2.6	0.0117	0.355431	no
igf2bp3	NC_007130.6:20616564-20661377	control	10	OK	27.189	15.7031	-0.791978	-2.41898	0.01155	0.352711	no
igfbp1a	NC_007134.6:36478992-36484198	control	10	OK	2.81434	0.931143	-1.59572	-3.1203	0.0033	0.161479	yes
igfbp6b	NC_007131.6:6818826-6822654	control	10	OK	9.47099	44.5399	2.23351	6.97863	5e-05	0.00654421	no
igfn1.1,igfn1.3	NC_007117.6:46841894-46939483	control	10	OK	37.9073	10.7323	-1.82051	-5.65433	5e-05	0.00654421	yes
il1b	NC_007121.6:45108694-45117163	control	10	OK	0.231809	5.47007	4.56055	6.5514	0.0011	0.0774124	no
il21r.1	NC_007114.6:47391332-47409201	control	10	OK	0.434323	1.51883	1.80612	2.95992	0.00395	0.179955	no
il4r.1	NC_007114.6:43299841-43359124	control	10	OK	1.9418	5.28097	1.44341	2.42575	0.0146	0.407143	no
il4r.2	NC_007114.6:43299841-43359124	control	10	OK	2.25993	5.36156	1.24637	2.64513	0.0067	0.25693	no
il6st	NC_007121.6:5787326-5820422	control	10	OK	6.2216	11.9562	0.942404	2.75512	0.0052	0.21648	no
im:7137886	NC_007125.6:7391320-7437739	control	10	OK	14.7419	61.3925	2.05814	3.40485	0.00085	0.0639308	no
im:7151449	NC_007117.6:47471258-47507876	control	10	OK	3.06322	1.64235	-0.899282	-1.93855	0.04555	0.708002	no
im:7154332	NC_007122.6:6893133-6960294	control	10	OK	5.98066	2.29541	-1.38155	-2.61098	0.01315	0.383348	no
im:7165146	NC_007123.6:3043432-3059023	control	10	OK	15.2744	8.71936	-0.808817	-2.51818	0.0092	0.312118	no
impg2b	NC_007133.6:28370161-28408448	control	10	OK	1.82401	0.633562	-1.52556	-4.17033	0.0002	0.0215787	yes
insig1	NC_007118.6:40683254-40734665	control	10	OK	11.3322	29.9414	1.40172	3.78413	0.00015	0.0170511	yes
irak3	NC_007115.6:12783416-12792135	control	10	OK	0.516338	1.95325	1.91949	3.39579	0.0027	0.141514	no
irf3	NC_007123.6:4516935-4563225	control	10	OK	0.711023	2.40498	1.75806	3.05938	0.0051	0.213715	no
irf4a	NC_007113.6:984035-1009799	control	10	OK	0.593773	0.169678	-1.80711	-1.99239	0.0465	0.711865	no
irf7	NC_007136.6:25451155-25455843	control	10	OK	2.46367	6.25035	1.34313	3.20615	0.0027	0.141514	no
irf9	NC_007123.6:13244437-13268580	control	10	OK	3.45043	6.3441	0.878641	2.29246	0.0177	0.45053	no
irg1	NC_007120.6:22021311-22027176	control	10	OK	0.686935	1.77842	1.37236	2.43753	0.0196	0.47638	no
irg1l	NC_007125.6:11121037-11124541	control	10	OK	6.53174	25.0187	1.93747	5.93251	5e-05	0.00654421	yes
irgq2	NC_007126.6:38248956-38253006	control	10	OK	0.529259	0.0467929	-3.49961	-2.21069	0.0208	0.489079	no
iscub	NC_007116.6:31259884-31268694	control	10	OK	2.92831	5.94866	1.0225	2.22836	0.02535	0.540689	no
isg15	NC_007116.6:19608231-19609486	control	10	OK	0.209806	3.41864	4.02629	4.62931	0.01995	0.481046	no
isg20	NC_007136.6:18997292-19002529	control	10	OK	14.9592	27.3029	0.868023	2.7693	0.0065	0.251742	no
ism1	NC_007124.6:34638440-34667612	control	10	OK	12.5399	8.0398	-0.641294	-2.01657	0.04235	0.692059	no
itch	NC_007134.6:43639026-43703516	control	10	OK	3.17453	5.01138	0.658662	1.90169	0.0499	0.731759	no
itga10	NC_007127.6:14359425-14463707	control	10	OK	4.14622	1.21168	-1.77479	-3.67971	0.0011	0.0774124	no
itga6b	NC_007123.6:5549553-5628662	control	10	OK	7.40886	3.96337	-0.902524	-2.093	0.0273	0.560759	no
itgb4	NC_007119.6:13064989-13122687	control	10	OK	5.24635	9.4084	0.842634	2.62593	0.00725	0.270323	no
itgbl1	NC_007120.6:31941686-32022243	control	10	OK	16.0265	8.46101	-0.921562	-2.80957	0.00455	0.197891	no
itih6	NC_007134.6:26112846-26135404	control	10	OK	0.845775	0.0787343	-3.42521	-4.7476	0.0036	0.171136	no
iyd	NC_007134.6:39882019-39891465	control	10	OK	1.24229	0.201407	-2.62482	-2.80982	0.0294	0.579582	no
jph1b	NC_007113.6:30306916-30340818	control	10	OK	35.5818	21.399	-0.733597	-2.26558	0.02055	0.487787	no
jph2	NC_007134.6:35619469-35657382	control	10	OK	36.4211	22.434	-0.699086	-2.13391	0.0332	0.615342	no
junba	NC_007112.6:51098614-51100150	control	10	OK	8.29647	23.6056	1.50856	4.53359	5e-05	0.00654421	yes
junbb	NC_007114.6:7768568-7770219	control	10	OK	16.0767	57.3593	1.83505	5.88042	5e-05	0.00654421	yes
kal1b	NC_007133.6:38837187-38927127	control	10	OK	5.37609	3.30484	-0.701977	-2.11013	0.0309	0.594263	no
kazald3	NC_007119.6:42602989-42617667	control	10	OK	7.18257	4.03392	-0.83232	-2.1414	0.0343	0.625629	no
kbtbd7	NC_007120.6:17416002-17418661	control	10	OK	1.66422	0.458802	-1.8589	-3.49729	0.00345	0.166034	no
kcna6a	NC_007136.6:19849154-19853354	control	10	OK	1.38037	0.500207	-1.46446	-2.59067	0.01515	0.413909	no
kcnc3a	NC_007114.6:31821389-31928790	control	10	OK	8.24765	5.31752	-0.633229	-1.93082	0.04015	0.673718	no
kcnc4	NC_007119.6:24908504-24946628	control	10	OK	1.55582	0.759974	-1.03365	-2.11768	0.0309	0.594263	no
kcnj11	NC_007136.6:22755900-22758762	control	10	OK	9.75031	5.45529	-0.837794	-2.13638	0.03175	0.604105	no
kcnj1a.2,kcnj1a.3,kcnj1a.4,kcnj1a.5	NC_007129.6:48503647-48563723	control	10	OK	6.36672	17.2813	1.44059	3.90274	5e-05	0.00654421	yes
kcnj1a.6	NC_007129.6:48495174-48498262	control	10	OK	1.72754	5.09	1.55895	3.77354	0.00055	0.0465129	yes
kcnmb2	NC_007113.6:8020247-8031392	control	10	OK	2.90569	1.17709	-1.30366	-2.4072	0.0188	0.465006	no
kdelr3	NC_007114.6:225857-243253	control	10	OK	13.6777	7.92031	-0.7882	-2.28111	0.02535	0.540689	no
kdr	NC_007131.6:22321314-22380156	control	10	OK	1.28757	0.635333	-1.01907	-1.87582	0.04365	0.70023	no
kdrl	NC_007125.6:32643454-32704676	control	10	OK	3.33464	2.03453	-0.712831	-1.97545	0.044	0.701336	no
keap1a	NC_007113.6:41985606-42071214	control	10	OK	5.09923	15.2374	1.57927	4.17935	5e-05	0.00654421	yes
kiaa1731	NC_007126.6:146765-161346	control	10	OK	4.63563	7.29043	0.653239	1.94828	0.04585	0.709986	no
kif16bb	NC_007124.6:34501181-34557354	control	10	OK	0.767658	0.361798	-1.08528	-2.16675	0.03945	0.667409	no
kif1b,pgd	NC_007134.6:29454899-29579154	control	10	OK	45.4069	89.7898	0.983641	2.4235	0.01225	0.365948	no
kif5ab,zgc:153102	NC_007117.6:58742940-58834139	control	10	OK	7.04781	1.99919	-1.81776	-4.64462	5e-05	0.00654421	yes
klf2a	NC_007133.6:15871950-15874649	control	10	OK	12.2339	7.80564	-0.648297	-2.00638	0.04645	0.711722	no
klhl40a	NC_007113.6:21668535-21677148	control	10	OK	10.6308	6.05664	-0.811663	-2.42171	0.0146	0.407143	no
klhl40b	NC_007135.6:20430803-20437518	control	10	OK	6.83328	3.78168	-0.85355	-2.38048	0.01935	0.473261	no
kmt2bb	NC_007126.6:37555422-37642087	control	10	OK	4.91671	7.61782	0.631684	2.04792	0.035	0.631163	no
kmt2ca	NC_007135.6:7307536-7520259	control	10	OK	2.1524	3.64295	0.759164	2.45585	0.0106	0.332994	no
kng1	NC_007133.6:36898334-36915701	control	10	OK	18.1796	29.0047	0.673969	2.1035	0.0341	0.624421	no
krt1-19d	NC_007130.6:5408161-5416335	control	10	OK	24.8171	12.9013	-0.943816	-2.95316	0.0029	0.148441	no
krt17	NC_007130.6:5450938-5452979	control	10	OK	339.311	166.938	-1.02329	-3.02611	0.00365	0.171648	no
krt94	NC_007122.6:11484958-11487857	control	10	OK	21.1554	11.4027	-0.891656	-2.7735	0.00665	0.255853	no
lactbl1b	NC_007122.6:27880112-27909857	control	10	OK	1.05455	0.456313	-1.20853	-2.1943	0.02525	0.539707	no
lamb2	NC_007134.6:20253042-20333194	control	10	OK	8.80143	17.7293	1.01032	2.56648	0.01435	0.403222	no
lamb4	NC_007136.6:31219665-31292043	control	10	OK	6.50125	10.9433	0.751262	2.38912	0.0154	0.417481	no
lamp1	NC_007112.6:175023-179503	control	10	OK	9.94038	15.7198	0.661206	1.97978	0.04935	0.728363	no
lctla	NC_007118.6:33955777-33965030	control	10	OK	5.93141	1.75819	-1.75428	-4.42009	5e-05	0.00654421	yes
lctlb	NC_007129.6:19467572-19495650	control	10	OK	3.46108	0.664591	-2.38069	-2.98933	0.00765	0.280165	no
ldb3a	NC_007124.6:22350059-22423723	control	10	OK	86.6953	44.7394	-0.954409	-2.55563	0.0082	0.293703	no
ldb3b	NC_007123.6:25933705-25973150	control	10	OK	156.001	84.5473	-0.883726	-2.73401	0.0061	0.241459	no
ldha	NC_007136.6:25028067-25047211	control	10	OK	136.573	67.3455	-1.02002	-2.69026	0.00605	0.240841	no
lect1	NC_007120.6:54185532-54204648	control	10	OK	71.2763	119.625	0.747022	2.2585	0.0276	0.56263	no
lect2l	NC_007127.6:12365624-12375290	control	10	OK	8.53555	17.0658	0.999554	2.88725	0.0043	0.19081	no
lenep	NC_007127.6:22863837-22866177	control	10	OK	0.683506	0.0739854	-3.20764	-2.00963	0.0226	0.51148	no
leng8	NC_007127.6:12365624-12375290	control	10	OK	18.4113	11.3877	-0.693118	-2.25131	0.02145	0.49702	no
leng9	NC_007127.6:13919784-13927935	control	10	OK	1.51229	2.96754	0.972538	2.10057	0.0328	0.611489	no
lepa	NC_007129.6:10719497-10721647	control	10	OK	0	0.932939	inf	#NAME?	5e-05	0.00654421	yes
lepb	NC_007115.6:19042900-19044856	control	10	OK	0	1.62013	inf	#NAME?	5e-05	0.00654421	yes
lepr	NC_007117.6:31197290-31275713	control	10	OK	4.08994	6.7595	0.724835	2.28492	0.0188	0.465006	no
leprel1	NC_007133.6:24362704-24454716	control	10	OK	2.62014	4.14484	0.661674	1.95631	0.0499	0.731759	no
lgals3bpb	NC_007114.6:57671408-57673765	control	10	OK	4.54019	1.58102	-1.5219	-3.54213	0.00105	0.0749482	no
lgi3	NC_007119.6:51385933-51418299	control	10	OK	1.50561	0.559639	-1.42778	-2.61135	0.01115	0.343039	no
lgsn	NC_007122.6:11279829-11283257	control	10	OK	12.8119	3.01688	-2.08636	-5.88665	5e-05	0.00654421	yes
lhpp	NC_007123.6:46934398-46943807	control	10	OK	4.73065	8.3353	0.817195	2.10214	0.0407	0.678879	no
lim2.1	NC_007121.6:30009712-30046261	control	10	OK	18.6667	5.28296	-1.82105	-4.39191	0.00025	0.0256683	yes
lim2.3	NC_007126.6:19717092-19723846	control	10	OK	15.9626	3.4674	-2.20277	-4.91417	0.0001	0.0119493	yes
lim2.4	NC_007130.6:10622846-10635430	control	10	OK	43.7305	11.2434	-1.95956	-5.71412	5e-05	0.00654421	yes
lipg	NC_007119.6:32367703-32376773	control	10	OK	9.16305	14.7271	0.68457	2.16979	0.02955	0.58123	no
LOC100000241	NC_007126.6:106077-117206	control	10	OK	4.75603	2.47692	-0.94121	-2.50494	0.0116	0.353929	no
LOC100000332	NC_007118.6:19987953-19989411	control	10	OK	3.20941	10.6459	1.72992	4.16744	0.00025	0.0256683	yes
LOC100000365	NC_007134.6:677709-692146	control	10	OK	2.37372	0.992715	-1.2577	-2.70557	0.0043	0.19081	no
LOC100000576	NC_007118.6:41121414-41140098	control	10	OK	2.79	1.57579	-0.82419	-1.86918	0.04945	0.728363	no
LOC100000685	NC_007132.6:45635499-45646161	control	10	OK	1.32938	0.477699	-1.47658	-2.81769	0.00845	0.298383	no
LOC100000783	NC_007118.6:6226173-6226637	control	10	OK	0	1.68803	inf	#NAME?	0.0001	0.0119493	yes
LOC100000832	NC_007118.6:19560857-19575280	control	10	OK	2.37633	4.63037	0.962395	2.68597	0.00655	0.252979	no
LOC100001960,tln2a	NC_007118.6:29579433-29674895	control	10	OK	6.52846	4.17906	-0.643563	-2.04205	0.03445	0.627058	no
LOC100002045	NC_007112.6:44282521-44296193	control	10	OK	0.961846	0.41653	-1.20739	-2.21187	0.02725	0.560225	no
LOC100002059	NC_007126.6:17665557-17682773	control	10	OK	2.56364	1.40841	-0.86413	-2.22378	0.02325	0.517001	no
LOC100002104	NC_007126.6:595662-608436	control	10	OK	1.2444	0.316598	-1.97472	-2.95757	0.0093	0.314292	no
LOC100002181,wu:fe11b02,zgc:110434	NC_007118.6:6324684-6331711	control	10	OK	0.455409	2.08349	2.19377	2.36644	0.02075	0.489079	no
LOC100002182	NC_007119.6:19480783-19488270	control	10	OK	5.15656	8.35234	0.69577	1.99515	0.0425	0.693063	no
LOC100002858	NC_007116.6:68903264-68907103	control	10	OK	3.15361	1.56899	-1.00717	-2.11773	0.0329	0.612375	no
LOC100003669	NC_007122.6:27831468-27832539	control	10	OK	8.80143	17.7293	1.01032	2.56648	0.01435	0.403222	no
LOC100003714	NC_007114.6:60441391-60491445	control	10	OK	93.2696	50.846	-0.875272	-2.70863	0.0047	0.202031	no
LOC100004063	NC_007119.6:53919294-53966798	control	10	OK	1.78086	2.85504	0.680933	2.12629	0.02965	0.582216	no
LOC100004171,LOC100004336,LOC100006146,LOC101884412,LOC103908687,LOC563490	NC_007118.6:5783458-5791843	control	10	OK	0.567195	3.71033	2.70963	2.54626	0.014	0.397374	no
LOC100004744	NC_007136.6:10733488-10744030	control	10	OK	1.74842	0.839718	-1.05807	-2.28272	0.028	0.567152	no
LOC100004911	NC_007123.6:32071191-32074094	control	10	OK	2.91504	1.08647	-1.42387	-2.22479	0.0388	0.662657	no
LOC100005101	NC_007116.6:11565434-11593412	control	10	OK	1.46112	0.541871	-1.43105	-2.27614	0.0193	0.472698	no
LOC100005596	NC_007125.6:8332198-8391266	control	10	OK	3.53754	5.60171	0.663123	2.11002	0.0306	0.591254	no
LOC100005938	NC_007118.6:22697598-22710586	control	10	OK	0.57714	1.22565	1.08656	1.99713	0.04715	0.71649	no
LOC100006250	NC_007136.6:33550095-33564983	control	10	OK	4.94232	1.65024	-1.58251	-2.9592	0.0083	0.295471	no
LOC100006428	NC_007114.6:32003173-32004601	control	10	OK	1.20031	19.3056	4.00754	7.13323	5e-05	0.00654421	yes
LOC100006656	NC_007133.6:6749648-6824742	control	10	OK	0.60261	1.20233	0.996537	2.07084	0.03335	0.616816	no
LOC100007087	NC_007118.6:24778387-24786988	control	10	OK	0.194844	1.58256	3.02187	3.96557	0.002	0.115075	no
LOC100007686	NC_007114.6:4123826-4135486	control	10	OK	2.51365	5.19446	1.04719	2.08309	0.0457	0.708289	no
LOC100148510	NC_007116.6:21946198-21957591	control	10	OK	1.71835	0.978309	-0.812662	-2.10907	0.02995	0.584827	no
LOC100148591,LOC100329423,LOC100329560,LOC569982	NC_007118.6:73594838-73602690	control	10	OK	1.96041	10.7559	2.4559	5.28519	5e-05	0.00654421	yes
LOC100148752	NC_007112.6:56010925-56028058	control	10	OK	2.36856	0.711363	-1.73535	-3.07865	0.0045	0.196082	no
LOC100149227	NC_007112.6:56037143-56054303	control	10	OK	1.05307	2.59855	1.3031	2.44038	0.02055	0.487787	no
LOC100149526	NC_007136.6:35481468-35491329	control	10	OK	0.274852	0.611196	1.15298	2.11213	0.04195	0.689546	no
LOC100150043	NC_007123.6:34984595-34994514	control	10	OK	3.44087	1.77506	-0.954907	-2.26487	0.01945	0.474216	no
LOC100150803	NC_007122.6:556643-560699	control	10	OK	1.40615	0.617273	-1.18777	-2.2882	0.0251	0.537321	no
LOC100150811	NC_007124.6:18975492-19028487	control	10	OK	0.532296	1.76434	1.72883	2.54911	0.0269	0.556132	no
LOC100151486	NC_007133.6:12908557-12915957	control	10	OK	0.809239	0.207037	-1.96668	-2.19576	0.0444	0.701336	no
LOC100329262,LOC103909539	NC_007133.6:6919705-6938836	control	10	OK	1.74676	7.5009	2.10238	4.22499	5e-05	0.00654421	yes
LOC100329294	NC_007119.6:465397-490758	control	10	OK	0.942743	0	#NAME?	#NAME?	0.02325	0.517001	no
LOC100329520	NC_007117.6:59559335-59568802	control	10	OK	1.45061	0.700431	-1.05034	-2.06707	0.0305	0.590625	no
LOC100329862	NC_007125.6:11916561-12001538	control	10	OK	7.08128	4.41725	-0.680863	-1.93305	0.0451	0.706338	no
LOC100329887,crygm2d13	NC_007120.6:22280286-22377137	control	10	OK	861.618	184.481	-2.22358	-3.19302	0.0051	0.213715	no
LOC100330305	NC_007125.6:51607531-51637763	control	10	OK	2.30297	1.24212	-0.890694	-2.07266	0.0356	0.634951	no
LOC100330405	NC_007127.6:46551392-46558329	control	10	OK	5.47833	12.6542	1.2078	3.50839	0.0006	0.0496031	yes
LOC100330690	NC_007124.6:19029296-19034252	control	10	OK	0.639483	2.47792	1.95415	3.34549	0.00315	0.156879	no
LOC100330754	NC_007134.6:5529836-5562281	control	10	OK	5.10891	2.65643	-0.943526	-2.40731	0.01505	0.412626	no
LOC100330861	NC_007129.6:50947770-50953013	control	10	OK	1.32888	0.438302	-1.60021	-2.75882	0.01315	0.383348	no
LOC100330916	NC_007112.6:58699797-58805059	control	10	OK	0.261264	0.573034	1.13311	3.31666	0.0008	0.0609558	no
LOC100331378,zgc:174938	NC_007127.6:46601637-46621441	control	10	OK	28.6821	55.0699	0.941114	3.02748	0.0024	0.130884	no
LOC100331439	NC_007122.6:43126166-43165145	control	10	OK	4.70302	10.0915	1.10149	3.25375	0.001	0.0721887	no
LOC100331557	NC_007124.6:9691417-9706993	control	10	OK	83.3731	26.0564	-1.67795	-5.35414	5e-05	0.00654421	yes
LOC100331588	NC_007132.6:7737052-7764493	control	10	OK	6.30606	11.7325	0.895696	2.16229	0.0349	0.630333	no
LOC100331776	NC_007133.6:20696293-20722188	control	10	OK	44.3205	25.4337	-0.801232	-2.27493	0.02275	0.511897	no
LOC100331800	NC_007128.6:39924421-39939531	control	10	OK	1.53083	0.611837	-1.32309	-2.75921	0.00715	0.268165	no
LOC100331956,LOC100333837	NC_007124.6:1665191-1738232	control	10	OK	2.74922	0.903832	-1.6049	-3.62967	0.00025	0.0256683	yes
LOC100331980	NC_007135.6:38668821-38710009	control	10	OK	1.09154	0.466353	-1.22687	-2.27173	0.02445	0.530543	no
LOC100331996	NC_007113.6:14340943-14343695	control	10	OK	1.36847	0.572797	-1.25647	-2.33617	0.02875	0.576012	no
LOC100332066	NC_007114.6:59560803-59571562	control	10	OK	15.9491	9.50201	-0.74717	-1.98148	0.03725	0.648684	no
LOC100332229	NW_003334027.1:14150-15151	control	10	OK	0.705888	0	#NAME?	#NAME?	0.00245	0.132068	no
LOC100332327,LOC101886855	NC_007118.6:2310798-2355232	control	10	OK	1.98768	6.43676	1.69525	4.47724	5e-05	0.00654421	yes
LOC100332354	NC_007114.6:9314421-9400802	control	10	OK	0.988291	2.30693	1.22297	2.14909	0.0407	0.678879	no
LOC100332446	NC_007123.6:44968081-44979129	control	10	OK	3.63549	1.61093	-1.17426	-2.29445	0.02475	0.534238	no
LOC100332943	NC_007134.6:45928379-45954330	control	10	OK	3.64375	2.11645	-0.783779	-2.19779	0.03175	0.604105	no
LOC100333117	NC_007118.6:1313998-1320014	control	10	OK	4.98307	9.26127	0.894174	2.15862	0.0351	0.632315	no
LOC100333177,keap1b	NC_007117.6:107244-120564	control	10	OK	10.1585	23.1143	1.1861	3.60147	0.0002	0.0215787	yes
LOC100333266	NC_007114.6:6172911-6186042	control	10	OK	1.40759	0.481662	-1.54714	-2.60393	0.01155	0.352711	no
LOC100333269	NC_007115.6:9027882-9049615	control	10	OK	7.65401	12.0482	0.654526	2.13279	0.0359	0.637865	no
LOC100333801	NW_003334319.1:177175-211816	control	10	OK	3.94125	7.00254	0.829225	2.37836	0.0145	0.406296	no
LOC100333879,LOC101885715,LOC101885858	NC_007118.6:69489047-69576534	control	10	OK	4.85062	8.89565	0.874932	1.97688	0.0332	0.615342	no
LOC100333916	NC_007113.6:58765800-58785277	control	10	OK	28.6247	18.6393	-0.618911	-1.97434	0.0409	0.679948	no
LOC100334082	NC_007112.6:55990199-55995108	control	10	OK	12.345	1.28273	-3.26664	-8.10947	5e-05	0.00654421	yes
LOC100334085	NC_007130.6:1381880-1397067	control	10	OK	3.7556	1.98508	-0.919847	-2.27274	0.02335	0.517908	no
LOC100334559	NC_007118.6:73635047-73636596	control	10	OK	0.296362	0.972088	1.71373	2.34989	0.03685	0.645248	no
LOC100334869,LOC100334934,LOC562770,zgc:163061	NC_007118.6:73622106-73631352	control	10	OK	1.50801	3.56088	1.23959	1.91296	0.03925	0.665473	no
LOC100335008	NW_003337130.1:39193-63648	control	10	OK	1.84853	0.702366	-1.39608	-2.57911	0.01565	0.421161	no
LOC100534741	NC_007125.6:40507152-40536969	control	10	OK	2.27599	0.86378	-1.39776	-3.16959	0.0034	0.164874	no
LOC100534809	NC_007128.6:26524753-26534794	control	10	OK	1.22397	0.371237	-1.72115	-2.07432	0.032	0.606096	no
LOC100535237	NW_003337006.1:3219-5673	control	10	OK	1.60384	0.455461	-1.81613	-2.36946	0.03685	0.645248	no
LOC100535278	NC_007124.6:45572701-45638265	control	10	OK	1.06792	0.249784	-2.09605	-4.14448	0.00075	0.0584825	no
LOC100535301,LOC103909295	NC_007112.6:51737505-51748508	control	10	OK	1.41409	4.02231	1.50815	3.83307	5e-05	0.00654421	yes
LOC100535324,tmem237a	NC_007120.6:13711096-13757734	control	10	OK	3.44014	1.31627	-1.38601	-2.73403	0.0037	0.172493	no
LOC100535442	NC_007116.6:56693875-56702503	control	10	OK	0.393765	1.76844	2.16707	2.61064	0.02195	0.502782	no
LOC100535571	NC_007130.6:25398170-25404387	control	10	OK	1.17854	0.437881	-1.42839	-2.13624	0.0351	0.632315	no
LOC100535586	NC_007133.6:38028950-38044150	control	10	OK	12.8753	4.06253	-1.66416	-3.78935	0.0004	0.0363284	yes
LOC100535622	NW_003336678.1:28625-32061	control	10	OK	6.53335	26.4293	2.01625	5.37684	5e-05	0.00654421	yes
LOC100535657	NC_007125.6:12729957-12742771	control	10	OK	18.2062	58.0774	1.67355	3.35182	0.0008	0.0609558	no
LOC100535683	NC_007122.6:2323230-2337431	control	10	OK	0.386614	1.07292	1.47258	2.35251	0.0286	0.573663	no
LOC100535713	NC_007117.6:65810-83639	control	10	OK	3.8301	2.03742	-0.910638	-1.88123	0.0476	0.718804	no
LOC100535731	NC_007124.6:51565529-51573017	control	10	OK	2.81298	0.548559	-2.35838	-3.22286	0.01005	0.326244	no
LOC100535760	NC_007121.6:1954921-1962828	control	10	OK	13.6457	3.9896	-1.77413	-5.34929	5e-05	0.00654421	yes
LOC100536033	NC_007131.6:12559249-12561754	control	10	OK	2.47271	9.17255	1.89123	4.46888	0.0001	0.0119493	yes
LOC100536170	NW_008805426.1:9023-18181	control	10	OK	0.668054	0	#NAME?	#NAME?	0.00415	0.186041	no
LOC100536295	NC_007127.6:16713264-16741796	control	10	OK	3.66884	0.59826	-2.61648	-6.81471	5e-05	0.00654421	yes
LOC100536415	NC_007113.6:56814406-56845348	control	10	OK	17.0275	29.6498	0.800156	2.28902	0.02355	0.520202	no
LOC100536600	NC_007127.6:50355421-50363604	control	10	OK	1.32732	4.03458	1.6039	3.85046	0.0003	0.0297548	yes
LOC100536666	NC_007126.6:12479736-12484691	control	10	OK	5.03818	9.50534	0.915836	2.24468	0.0283	0.569767	no
LOC100536698	NW_003336894.1:18962-40386	control	10	OK	1.58698	4.53147	1.51369	3.03455	0.00585	0.235287	no
LOC100536813,wu:fb18f06	NC_007126.6:46141942-46199252	control	10	OK	223.516	400.115	0.840036	2.63258	0.00725	0.270323	no
LOC100536887	NW_003336908.1:1195-7931	control	10	OK	4.22505	35.4672	3.06944	8.35211	5e-05	0.00654421	yes
LOC100536992	NC_007118.6:64306289-64312334	control	10	OK	0.229521	0.561581	1.29087	2.36428	0.0258	0.544483	no
LOC100537037	NC_007127.6:22211868-22218318	control	10	OK	0	0.846639	inf	#NAME?	5e-05	0.00654421	yes
LOC100537109	NC_007125.6:33519773-33531963	control	10	OK	2.26759	0.826272	-1.45647	-2.6174	0.0118	0.357229	no
LOC100537138	NC_007117.6:156252-162063	control	10	OK	3.30893	5.65472	0.773093	2.14782	0.03475	0.629573	no
LOC100537178	NC_007126.6:3964196-4329868	control	10	OK	1.93508	7.65198	1.98344	2.16616	0.0465	0.711865	no
LOC100537264	NW_003337115.1:4553-10445	control	10	OK	3.33348	7.86517	1.23845	2.69437	0.0103	0.326499	no
LOC100537272	NC_007132.6:48834-65146	control	10	OK	0.235345	0.516272	1.13335	2.05405	0.0488	0.726864	no
LOC100537292	NC_007123.6:24909010-24924525	control	10	OK	0.410206	0.844751	1.04218	2.37046	0.0196	0.47638	no
LOC100537295	NC_007113.6:329763-331721	control	10	OK	179.897	61.1329	-1.55715	-5.03572	5e-05	0.00654421	yes
LOC100537679	NC_007123.6:49165604-49168605	control	10	OK	8.28804	4.56981	-0.858896	-1.96701	0.04465	0.702906	no
LOC100537702	NC_007128.6:50910953-50916097	control	10	OK	4.82679	1.57562	-1.61514	-2.36308	0.0327	0.610438	no
LOC100537733	NC_007114.6:58806371-58817730	control	10	OK	0.799959	2.13753	1.41794	2.64158	0.01425	0.40154	no
LOC100537765	NW_008805526.1:25640-36636	control	10	OK	0.85261	4.77495	2.48553	5.22825	5e-05	0.00654421	yes
LOC100537875,herc2	NC_007117.6:37774875-37871460	control	10	OK	4.33711	6.89686	0.669207	2.01483	0.0399	0.671615	no
LOC100538016	NC_007127.6:24903372-24917189	control	10	OK	2.39946	7.29235	1.60368	3.79141	0.0003	0.0297548	yes
LOC100538072	NC_007113.6:53253661-53311372	control	10	OK	1.30078	3.22779	1.31117	2.79298	0.007	0.264666	no
LOC100538256	NC_007117.6:1310437-1315249	control	10	OK	0.405174	1.21238	1.58123	2.3627	0.02695	0.557001	no
LOC100538267	NC_007118.6:6427436-6468785	control	10	OK	2.11243	0.927595	-1.18734	-2.71477	0.00895	0.307359	no
LOC100538287	NC_007118.6:10346712-10366268	control	10	OK	13.9771	33.9607	1.28081	3.43152	0.0008	0.0609558	no
LOC101882048	NC_007115.6:64679741-64680286	control	10	OK	0	1.05844	inf	#NAME?	0.01025	0.326244	no
LOC101882071	NC_007134.6:45186971-45205269	control	10	OK	0.378914	0.862011	1.18584	2.22486	0.0254	0.541097	no
LOC101882095	NC_007115.6:66537553-66567996	control	10	OK	0	0.895693	inf	#NAME?	0.00075	0.0584825	no
LOC101882290	NC_007118.6:1841304-1842267	control	10	OK	3.53699	20.9726	2.56791	6.25106	5e-05	0.00654421	yes
LOC101882328,myh7bb	NC_007134.6:18795382-18831025	control	10	OK	6.73766	3.97757	-0.760361	-2.34053	0.0174	0.4463	no
LOC101882555	NC_007135.6:37023112-37033375	control	10	OK	1.71202	0.681902	-1.32806	-2.61525	0.0093	0.314292	no
LOC101882598	NC_007114.6:59775286-59777685	control	10	OK	0.751349	2.34349	1.6411	2.19778	0.0315	0.601507	no
LOC101882892	NC_007132.6:29676832-29761489	control	10	OK	0.0779733	0.57108	2.87264	0.837845	0.0021	0.119067	no
LOC101883235	NC_007117.6:59969894-59971007	control	10	OK	0.18326	1.24858	2.76832	2.93516	0.04995	0.731879	no
LOC101883293	NC_007126.6:44202621-44232652	control	10	OK	0.988715	2.5203	1.34997	2.5114	0.014	0.397374	no
LOC101883456	NC_007114.6:59820109-59831723	control	10	OK	0.752155	2.30972	1.61862	3.5028	0.00135	0.0893488	no
LOC101883568	NC_007132.6:22333177-22338372	control	10	OK	1.78841	0.783109	-1.19139	-1.9622	0.04435	0.701336	no
LOC101883586	NW_003336449.1:81-13868	control	10	OK	0.696852	0	#NAME?	#NAME?	0.02325	0.517001	no
LOC101883588	NW_003336858.1:5549-5983	control	10	OK	0.831774	0	#NAME?	#NAME?	0.02325	0.517001	no
LOC101883708,phf20l1	NC_007127.6:31640995-31670259	control	10	OK	18.9094	37.3257	0.981064	2.793	0.0041	0.185222	no
LOC101883737	NC_007120.6:6015088-6018065	control	10	OK	0.399527	3.70028	3.21127	2.24553	0.0313	0.598831	no
LOC101883856	NC_007129.6:5986159-6003023	control	10	OK	1.00823	2.3717	1.23409	2.79266	0.0063	0.247279	no
LOC101883985	NC_007129.6:30165514-30165906	control	10	OK	0	2.66207	inf	#NAME?	0.01025	0.326244	no
LOC101884025	NW_003337033.1:5986-42745	control	10	OK	2.13669	4.43826	1.05462	2.40564	0.0167	0.437153	no
LOC101884166	NC_007129.6:29961536-29968820	control	10	OK	0.316304	0.694073	1.13377	2.38884	0.0203	0.485142	no
LOC101884197	NC_007135.6:25156699-25189256	control	10	OK	0.38937	0.936269	1.26578	2.29189	0.02395	0.525886	no
LOC101884260	NC_007130.6:17417637-17424691	control	10	OK	0	0.67006	inf	#NAME?	0.0463	0.711578	no
LOC101884267	NC_007126.6:42188671-42193037	control	10	OK	6.47195	0	#NAME?	#NAME?	0.00045	0.0399878	yes
LOC101884282	NW_003337125.1:39185-40736	control	10	OK	0.356051	2.35572	2.72601	2.84474	0.015	0.412062	no
LOC101884333	NC_007115.6:49739778-49748671	control	10	OK	0.757631	4.26781	2.49393	1.7077	0.01845	0.461731	no
LOC101884355	NC_007115.6:403243-563075	control	10	OK	0	0.681821	inf	#NAME?	0.00365	0.171648	no
LOC101884375	NC_007115.6:60902611-60904555	control	10	OK	1.36785	0	#NAME?	#NAME?	0.04305	0.695224	no
LOC101884463	NC_007115.6:47018875-47020470	control	10	OK	0.25178	1.59102	2.65972	3.43143	0.01325	0.384981	no
LOC101884625	NC_007118.6:17530607-17551354	control	10	OK	4.13571	2.57652	-0.682714	-2.0148	0.0384	0.659202	no
LOC101884652	NC_007124.6:41740198-41741861	control	10	OK	0	0.776198	inf	#NAME?	0.01025	0.326244	no
LOC101884756	NC_007132.6:11108726-11133375	control	10	OK	0.998533	0.536612	-0.895931	-2.0906	0.03555	0.634868	no
LOC101884857,zgc:112965	NC_007114.6:10762426-10784949	control	10	OK	1.61105	0.670352	-1.26501	-2.83976	0.0048	0.20482	no
LOC101884884	NC_007115.6:45868814-45882851	control	10	OK	0.415262	0.983492	1.24389	2.05916	0.04395	0.701336	no
LOC101884954	NC_007129.6:7610465-7613482	control	10	OK	3.85501	50.5016	3.71152	9.89817	5e-05	0.00654421	yes
LOC101885045	NC_007125.6:6814214-6822486	control	10	OK	6.2342	2.59361	-1.26524	-4.04231	5e-05	0.00654421	yes
LOC101885134	NC_007114.6:58791574-58794911	control	10	OK	0	1.71538	inf	#NAME?	0.00275	0.14349	no
LOC101885172,vwa5b1	NC_007134.6:37015695-37119060	control	10	OK	1.00319	0.405678	-1.30619	-2.06345	0.0387	0.661756	no
LOC101885256	NC_007113.6:58996785-59019581	control	10	OK	10.0496	21.838	1.11971	2.86012	0.0058	0.234218	no
LOC101885450	NC_007113.6:1055729-1061469	control	10	OK	1.78695	0.65758	-1.44226	-2.28147	0.0363	0.641392	no
LOC101885490	NC_007133.6:28957194-28974442	control	10	OK	0	2.09531	inf	#NAME?	0.0443	0.701336	no
LOC101885496	NC_007115.6:31983535-31986918	control	10	OK	0	0.643852	inf	#NAME?	0.03885	0.662864	no
LOC101885510	NC_007136.6:8441589-8442545	control	10	OK	5.76365	19.8918	1.78712	2.90453	0.0094	0.316602	no
LOC101885512	NC_007115.6:4592909-4603253	control	10	OK	3.42232	13.2211	1.9498	4.93697	5e-05	0.00654421	yes
LOC101885514	NC_007123.6:315445-328914	control	10	OK	0.992156	0.246458	-2.00923	-3.08825	0.0089	0.306997	no
LOC101885646	NC_007129.6:17792186-17796622	control	10	OK	0.935402	0.472768	-0.984455	-1.97394	0.04395	0.701336	no
LOC101885809	NC_007115.6:64069651-64071153	control	10	OK	0.83639	0	#NAME?	#NAME?	0.0211	0.493977	no
LOC101885994	NC_007123.6:15960173-15966633	control	10	OK	1.61104	0.655182	-1.29803	-3.26922	0.00205	0.117277	no
LOC101886033	NC_007131.6:54675788-54680758	control	10	OK	4.12047	2.04901	-1.00788	-2.34542	0.0222	0.506026	no
LOC101886109	NC_007130.6:9748070-9764091	control	10	OK	2.48431	4.6823	0.914371	2.27624	0.01985	0.479461	no
LOC101886142,LOC103911298	NC_007118.6:786397-816012	control	10	OK	0.821767	3.64548	2.14931	2.20261	0.0047	0.202031	no
LOC101886252	NC_007119.6:53509261-53530583	control	10	OK	0.2747	0.814011	1.56719	1.81091	0.0494	0.728363	no
LOC101886327	NC_007135.6:29574771-29607178	control	10	OK	5.04395	2.8268	-0.835381	-2.02422	0.0389	0.663394	no
LOC101886331	NC_007118.6:490672-498888	control	10	OK	1.7844	3.03283	0.765227	2.08526	0.0272	0.55969	no
LOC101886389	NC_007126.6:45650351-45659290	control	10	OK	2.21741	0.751954	-1.56016	-3.67192	0.0012	0.0822993	no
LOC101886492	NC_007119.6:39004419-39011824	control	10	OK	0.996922	0	#NAME?	#NAME?	0.02325	0.517001	no
LOC101886550	NC_007122.6:17771833-17774077	control	10	OK	0.978695	0	#NAME?	#NAME?	0.0155	0.418733	no
LOC101886597	NW_001884413.3:135290-148088	control	10	OK	0.527563	0	#NAME?	#NAME?	0.04305	0.695224	no
LOC101886641	NC_007118.6:26262820-26271230	control	10	OK	0.29839	1.16038	1.95933	2.64467	0.0318	0.604105	no
LOC101886642	NC_007121.6:17108113-17118391	control	10	OK	0.778282	0.345102	-1.17327	-2.39551	0.0185	0.462322	no
LOC101886648	NC_007116.6:7751974-7768117	control	10	OK	0.108198	0.528369	2.28788	2.99146	0.0061	0.241459	no
LOC101886684	NC_007135.6:29877179-29900540	control	10	OK	6.59768	2.14929	-1.6181	-3.85384	0.0004	0.0363284	yes
LOC101886739	NC_007129.6:8886507-8903024	control	10	OK	0.735088	0.24644	-1.57668	-2.77257	0.01345	0.388535	no
LOC101886765	NC_007135.6:17134909-17188591	control	10	OK	0.114191	0.809451	2.8255	1.56187	0.01055	0.331721	no
LOC101886780	NC_007136.6:30746455-30818998	control	10	OK	31.363	15.8284	-0.986551	-2.21207	0.02625	0.549179	no
LOC101886824	NC_007113.6:32621648-32624314	control	10	OK	0.729552	0	#NAME?	#NAME?	0.0176	0.449291	no
LOC101886883	NC_007135.6:5361-9703	control	10	OK	1.05401	0.444253	-1.24644	-1.77145	0.0325	0.608977	no
LOC101886884	NC_007136.6:36888871-36897985	control	10	OK	10.139	4.9461	-1.03555	-2.82689	0.0062	0.244312	no
LOC101886887	NC_007115.6:74657457-74667102	control	10	OK	0.228878	1.64463	2.84512	4.42408	0.00225	0.124942	no
LOC101886901	NC_007116.6:7779780-7827684	control	10	OK	0.255868	1.34189	2.39079	3.64326	0.00605	0.240841	no
LOC101886946	NW_001884386.4:47272-50016	control	10	OK	0.915151	3.72903	2.02672	3.44633	0.00325	0.159702	no
LOC101886948	NC_007123.6:20948157-20976617	control	10	OK	0.281272	0.679238	1.27195	0.900078	0.0354	0.633806	no
LOC101887042	NC_007125.6:13411325-13421305	control	10	OK	2.28938	11.9572	2.38485	7.09134	5e-05	0.00654421	yes
LOC101887055	NC_007133.6:5966397-5977053	control	10	OK	0.866703	14.1471	4.02882	1.3831	0.0452	0.707113	no
LOC101887132	NC_007126.6:46073989-46086455	control	10	OK	6.99174	23.8364	1.76944	3.42902	0.0013	0.0873607	no
LOC103908655	NC_007128.6:50209811-50213039	control	10	OK	1.13768	2.40934	1.08254	2.06563	0.0457	0.708289	no
LOC103908673	NW_003335149.2:30377-32746	control	10	OK	0	0.909369	inf	#NAME?	0.0203	0.485142	no
LOC103908745	NC_007125.6:20006366-20006891	control	10	OK	0	0.89804	inf	#NAME?	0.01025	0.326244	no
LOC103908759	NC_007125.6:31727964-31807656	control	10	OK	0.838469	0.463043	-0.85661	-1.95539	0.04055	0.677831	no
LOC103908766	NC_007125.6:41743484-41748055	control	10	OK	0	2.42332	inf	#NAME?	0.01025	0.326244	no
LOC103908791,si:ch73-128c2.6	NC_007126.6:1729588-1746803	control	10	OK	1.77243	0.673089	-1.39686	-1.8867	0.02805	0.567836	no
LOC103908986	NC_007127.6:51328492-51349841	control	10	OK	69.7843	45.2918	-0.623654	-2.05017	0.03715	0.647909	no
LOC103909005	NC_007128.6:4312177-4320617	control	10	OK	0.547415	0	#NAME?	#NAME?	0.00245	0.132068	no
LOC103909063	NC_007128.6:39839813-39842360	control	10	OK	0.845956	0.29592	-1.51537	-2.12547	0.04965	0.729774	no
LOC103909080,LOC565594	NC_007112.6:40871759-40892282	control	10	OK	0.56178	1.49803	1.41499	2.05609	0.02975	0.583688	no
LOC103909169	NC_007129.6:35189319-35192057	control	10	OK	5.46176	0.926556	-2.55942	-1.56455	0.0379	0.655277	no
LOC103909185	NC_007130.6:890330-910726	control	10	OK	10.9984	7.06277	-0.638986	-2.09763	0.0366	0.643445	no
LOC103909189	NC_007130.6:2635092-2636331	control	10	OK	4.64404	0	#NAME?	#NAME?	0.02025	0.485106	no
LOC103909233	NC_007130.6:24138544-24139667	control	10	OK	0	1.07724	inf	#NAME?	0.01025	0.326244	no
LOC103909279	NC_007130.6:48166379-48166974	control	10	OK	0	5.11378	inf	#NAME?	0.01025	0.326244	no
LOC103909285	NC_007112.6:51721517-51732259	control	10	OK	0.0545384	2.6282	5.59066	2.98117	0.007	0.264666	no
LOC103909417	NC_007132.6:6046440-6053084	control	10	OK	0	1.08172	inf	#NAME?	0.0008	0.0609558	no
LOC103909543	NC_007112.6:58107097-58111503	control	10	OK	0.152738	0.631679	2.04813	2.25467	0.0462	0.711578	no
LOC103909664	NC_007134.6:12705805-12706645	control	10	OK	2.56297	0.512209	-2.32301	-1.41032	0.04595	0.710277	no
LOC103909671	NC_007134.6:16352418-16355772	control	10	OK	30.9186	111.651	1.85245	5.92055	5e-05	0.00654421	yes
LOC103909748,LOC569952	NC_007135.6:18545105-18587979	control	10	OK	1.71476	0.866221	-0.985196	-2.10025	0.03015	0.586606	no
LOC103909761	NC_007135.6:27296290-27300991	control	10	OK	0.350521	5.02102	3.84041	3.19906	0.01585	0.42426	no
LOC103909923	NW_008805347.1:88762-101227	control	10	OK	10.7884	6.1393	-0.813337	-2.28376	0.02435	0.530345	no
LOC103909947	NW_008805414.1:350-1465	control	10	OK	13.1034	24.9049	0.926483	2.12113	0.0368	0.645248	no
LOC103909970	NW_008805454.1:14989-40199	control	10	OK	2.87658	1.15293	-1.31905	-3.14199	0.0017	0.104146	no
LOC103909985	NW_008805483.1:2386-39371	control	10	OK	0.185444	0.792105	2.09471	3.14878	0.00985	0.325496	no
LOC103909994	NW_008805523.1:1241-7558	control	10	OK	3.07799	6.88691	1.16187	2.16731	0.03445	0.627058	no
LOC103909999	NW_008805536.1:25-342	control	10	OK	40.9816	90.6278	1.14498	2.69743	0.0103	0.326499	no
LOC103910003	NW_008805541.1:10508-11721	control	10	OK	0.59326	0	#NAME?	#NAME?	0.0102	0.326244	no
LOC103910020	NC_007113.6:15960992-15961635	control	10	OK	0	21.3318	inf	#NAME?	0.01025	0.326244	no
LOC103910026	NW_008805569.1:438-37993	control	10	OK	208.947	124.928	-0.742043	-2.33359	0.01815	0.456016	no
LOC103910218	NC_007113.6:41889786-41909026	control	10	OK	0	0.858075	inf	#NAME?	0.01025	0.326244	no
LOC103910263	NC_007114.6:31038376-31040032	control	10	OK	0	0.833152	inf	#NAME?	0.01025	0.326244	no
LOC103910472	NC_007115.6:29713482-29729222	control	10	OK	5.89897	16.8079	1.5106	1.81372	0.02895	0.577705	no
LOC103910535	NC_007115.6:36134434-36137324	control	10	OK	0	1.98336	inf	#NAME?	0.01025	0.326244	no
LOC103910551,LOC103910552	NC_007115.6:37437592-37441212	control	10	OK	0.569788	0	#NAME?	#NAME?	0.01215	0.364516	no
LOC103910632	NC_007115.6:42039309-42039873	control	10	OK	0	1.00532	inf	#NAME?	0.01025	0.326244	no
LOC103910657	NC_007115.6:43739809-43751092	control	10	OK	0	0.582478	inf	#NAME?	0.029	0.577879	no
LOC103910670	NC_007115.6:44768403-44770593	control	10	OK	0	0.703899	inf	#NAME?	0.00985	0.325496	no
LOC103910738	NC_007123.6:49024380-49026451	control	10	OK	0	5.89495	inf	#NAME?	0.01025	0.326244	no
LOC103910832	NC_007115.6:59105908-59124460	control	10	OK	2.31979	9.71081	2.0656	2.47722	0.0339	0.622386	no
LOC103910920	NC_007115.6:65697242-65697838	control	10	OK	1.18278	0.23273	-2.34545	-1.42394	0.04595	0.710277	no
LOC103910926	NC_007115.6:64934587-64935344	control	10	OK	0.767616	0.125034	-2.61807	-1.6004	0.03355	0.618229	no
LOC103910967	NC_007115.6:69032429-69033789	control	10	OK	0	2.42332	inf	#NAME?	0.01025	0.326244	no
LOC103911096	NC_007116.6:39293663-39299714	control	10	OK	1.67988	0.782712	-1.10181	-2.75954	0.00765	0.280165	no
LOC103911179,xirp2a	NC_007117.6:9935707-9998158	control	10	OK	8.63296	4.35345	-0.987696	-2.3298	0.01555	0.419437	no
LOC103911241	NC_007117.6:25207487-25227874	control	10	OK	0.0981422	0.667496	2.76581	2.9325	0.04995	0.731879	no
LOC103911294	NC_007118.6:835612-836736	control	10	OK	0	1.09662	inf	#NAME?	0.01025	0.326244	no
LOC103911343	NC_007118.6:6296357-6297124	control	10	OK	0	0.58208	inf	#NAME?	0.001	0.0721887	no
LOC103911422	NC_007118.6:51550477-51551168	control	10	OK	0	1.00086	inf	#NAME?	0.00985	0.325496	no
LOC103911446,LOC570526	NC_007118.6:69626723-69659599	control	10	OK	10.7777	5.314	-1.02018	-3.01785	0.0011	0.0774124	no
LOC103911509	NC_007119.6:26948296-26951987	control	10	OK	0	0.61928	inf	#NAME?	0.01025	0.326244	no
LOC103911530	NW_003336980.1:8092-9958	control	10	OK	1.51655	0.385526	-1.97589	-2.80491	0.01205	0.362447	no
LOC103911834	NC_007122.6:19952713-19962176	control	10	OK	29.881	102.594	1.77965	4.79825	5e-05	0.00654421	yes
LOC103911838	NC_007122.6:22124698-22125527	control	10	OK	19.4076	0	#NAME?	#NAME?	0.0028	0.145341	no
LOC103911854	NC_007122.6:34378240-34381406	control	10	OK	0.61215	0.119612	-2.35552	-1.43005	0.04595	0.710277	no
LOC103911878	NC_007122.6:41371903-41382339	control	10	OK	0	8.09584	inf	#NAME?	0.01025	0.326244	no
LOC402880	NC_007135.6:28152441-28166708	control	10	OK	8.12595	3.18436	-1.35153	-2.83153	0.00925	0.313359	no
LOC405768	NC_007117.6:6767391-6807632	control	10	OK	7.56967	4.25286	-0.831796	-2.24766	0.02435	0.530345	no
LOC553343	NC_007128.6:15440813-15490453	control	10	OK	6.41313	3.22655	-0.991034	-3.05691	0.00225	0.124942	no
LOC553492	NC_007116.6:43223878-43258995	control	10	OK	0.297372	0.778068	1.38763	3.01549	0.0045	0.196082	no
LOC555478	NC_007118.6:15093053-15164803	control	10	OK	4.95602	2.9915	-0.728312	-2.02289	0.0409	0.679948	no
LOC555713	NC_007114.6:32801977-32820329	control	10	OK	7.66349	12.1339	0.662965	2.14993	0.0276	0.56263	no
LOC555911	NC_007127.6:28969135-29056235	control	10	OK	1.94509	0.869165	-1.16214	-2.72339	0.0095	0.318286	no
LOC556200	NC_007122.6:38240294-38246779	control	10	OK	3.97192	6.56992	0.72604	2.10761	0.03125	0.598528	no
LOC556578	NC_007118.6:66613283-66644800	control	10	OK	2.64505	1.39277	-0.925334	-2.14543	0.0285	0.572477	no
LOC556987	NC_007126.6:31396156-31397412	control	10	OK	0.987213	0	#NAME?	#NAME?	5e-05	0.00654421	yes
LOC557301	NC_007118.6:52691504-52692436	control	10	OK	1.35198	4.05048	1.58302	2.54614	0.02135	0.49651	no
LOC557447	NC_007116.6:55355261-55357907	control	10	OK	0.598957	0.200526	-1.57866	-2.30083	0.0417	0.687535	no
LOC557518	NC_007122.6:36722190-36764941	control	10	OK	10.613	5.38973	-0.977552	-2.92162	0.004	0.181524	no
LOC557811	NC_007112.6:9645171-9667831	control	10	OK	0.59909	0.248898	-1.26722	-2.04629	0.0493	0.728363	no
LOC558816	NC_007114.6:31997762-31999329	control	10	OK	4.95608	59.5406	3.5866	9.0559	5e-05	0.00654421	yes
LOC560010	NC_007118.6:39139150-39170099	control	10	OK	2.60132	1.01291	-1.36073	-2.07646	0.0429	0.694563	no
LOC560440	NC_007118.6:49423134-49441112	control	10	OK	0.358501	1.04395	1.542	2.8127	0.009	0.308019	no
LOC560773	NC_007125.6:33727753-33752431	control	10	OK	5.26008	13.6521	1.37597	4.47446	5e-05	0.00654421	yes
LOC561277	NC_007127.6:16132418-16212997	control	10	OK	5.97589	9.22946	0.627091	2.03933	0.04275	0.694068	no
LOC562466	NC_007135.6:31491693-31520632	control	10	OK	1.49912	0.437104	-1.77807	-2.40312	0.0042	0.187442	no
LOC563265	NC_007125.6:29428990-29433797	control	10	OK	24.0239	68.4924	1.51147	4.76213	5e-05	0.00654421	yes
LOC563874	NC_007126.6:19862209-19869659	control	10	OK	12.1394	4.86776	-1.31837	-3.62574	0.0005	0.0436552	yes
LOC563949	NC_007131.6:36477690-36482560	control	10	OK	2.11084	0.660591	-1.67599	-2.96972	0.0087	0.303538	no
LOC564019	NC_007133.6:21644025-21730576	control	10	OK	4.82845	3.06771	-0.654399	-1.93235	0.04455	0.701805	no
LOC564158	NC_007122.6:25039123-25054338	control	10	OK	3.87497	1.08849	-1.83185	-4.35093	5e-05	0.00654421	yes
LOC564761	NC_007122.6:3611242-3627398	control	10	OK	0.7564	0.0874131	-3.11323	-3.82565	0.01215	0.364516	no
LOC565078	NC_007122.6:3556480-3565316	control	10	OK	3.80663	1.82816	-1.05812	-2.12545	0.03525	0.633063	no
LOC565454	NC_007125.6:11124606-11132045	control	10	OK	0.884999	5.9267	2.74348	6.65836	5e-05	0.00654421	yes
LOC565641	NC_007121.6:20491254-20497272	control	10	OK	3.40731	1.41454	-1.2683	-2.48272	0.017	0.441212	no
LOC565781	NC_007126.6:36258375-36262300	control	10	OK	11.3016	20.6	0.866116	2.15001	0.036	0.638831	no
LOC566281	NC_007114.6:52351910-52365427	control	10	OK	2.16649	0.6898	-1.65111	-3.13498	0.0054	0.221774	no
LOC566993	NC_007116.6:37460188-37464067	control	10	OK	0.338253	1.25468	1.89114	2.18035	0.01645	0.433037	no
LOC566996	NC_007118.6:24095707-24103892	control	10	OK	0.101421	3.22993	4.99307	6.24671	0.00265	0.13973	no
LOC567192	NC_007118.6:38424465-38427390	control	10	OK	3.35865	1.4757	-1.18649	-2.26305	0.0305	0.590625	no
LOC567375	NC_007122.6:1383060-1385717	control	10	OK	2.17761	0.913565	-1.25317	-2.21764	0.0304	0.589831	no
LOC567622	NC_007127.6:51137587-51208716	control	10	OK	2.79475	4.47873	0.680369	1.93431	0.0494	0.728363	no
LOC567640	NC_007113.6:1073932-1115056	control	10	OK	2.37136	4.86553	1.03688	3.07846	0.00225	0.124942	no
LOC567822	NC_007113.6:38249339-38288904	control	10	OK	0.0751983	1.10691	3.8797	2.30497	0.0169	0.439268	no
LOC567909	NC_007119.6:13662163-13710046	control	10	OK	0.470934	1.20935	1.36064	2.09361	0.04765	0.719094	no
LOC567912	NC_007128.6:8166194-8332250	control	10	OK	2.47018	3.87775	0.650605	2.05044	0.03655	0.643212	no
LOC568460	NC_007124.6:9709399-9737698	control	10	OK	85.4302	25.0017	-1.77272	-5.68821	5e-05	0.00654421	yes
LOC568833	NC_007117.6:30469843-30481740	control	10	OK	0.949696	1.90909	1.00735	1.98399	0.04525	0.707421	no
LOC569381	NC_007128.6:52495270-52501348	control	10	OK	0.977745	4.00073	2.03273	4.29267	0.0003	0.0297548	yes
LOC569505	NC_007126.6:41944052-41959321	control	10	OK	1.01087	2.3176	1.19703	2.99086	0.0032	0.158021	no
LOC569583	NC_007127.6:45121253-45131284	control	10	OK	18.3573	30.7854	0.745893	2.21948	0.02545	0.541503	no
LOC569792	NC_007124.6:28773488-28783987	control	10	OK	10.7323	6.60301	-0.700767	-2.2357	0.029	0.577879	no
LOC570404	NC_007127.6:12716747-12726267	control	10	OK	0.133261	0.790392	2.56831	3.82382	0.00615	0.243026	no
LOC570492	NC_007130.6:44191612-44223747	control	10	OK	13.1354	6.93252	-0.92201	-2.96901	0.0029	0.148441	no
LOC571499	NC_007123.6:44368488-44459487	control	10	OK	0.119894	0.726248	2.5987	2.12794	0.0147	0.40782	no
LOC571944	NC_007118.6:73466241-73475849	control	10	OK	3.73083	1.99702	-0.90165	-2.1942	0.0275	0.562557	no
LOC572052	NC_007114.6:4077971-4112020	control	10	OK	0.761374	0.3448	-1.14284	-2.17366	0.03775	0.653814	no
LOC573378	NC_007118.6:61506629-61515964	control	10	OK	2.16605	0.79719	-1.44207	-2.70774	0.0144	0.404465	no
LOC792628	NC_007121.6:33617003-33628984	control	10	OK	0.256638	1.14653	2.15947	3.25614	0.009	0.308019	no
LOC792773	NC_007125.6:17295892-17353260	control	10	OK	1.79506	0.480771	-1.90061	-4.63441	0.00025	0.0256683	yes
LOC792958	NC_007127.6:55351743-55368175	control	10	OK	4.97046	10.255	1.04487	2.80316	0.00385	0.177361	no
LOC793342	NC_007114.6:3700863-3729157	control	10	OK	2.67789	5.39837	1.01143	2.74039	0.00475	0.203555	no
LOC793708	NC_007119.6:44809225-44876459	control	10	OK	0.886426	0.328588	-1.43172	-3.17101	0.00265	0.13973	no
LOC793710	NC_007118.6:38413998-38418578	control	10	OK	2.11625	0.880621	-1.26492	-2.63349	0.0103	0.326499	no
LOC794549	NC_007118.6:73634355-73634977	control	10	OK	0	1.31788	inf	#NAME?	5e-05	0.00654421	yes
LOC794675	NC_007128.6:20596307-20601116	control	10	OK	3.21618	0.733078	-2.13331	-2.51205	0.0122	0.365546	no
LOC795531	NW_003334026.1:3193-21049	control	10	OK	8.08882	4.47756	-0.853217	-2.35936	0.0217	0.500494	no
LOC795570	NC_007132.6:7105124-7118151	control	10	OK	1.2663	0.483723	-1.38836	-1.98144	0.04705	0.715436	no
LOC796453	NC_007114.6:56882507-56890050	control	10	OK	12.7034	21.3841	0.751328	2.35771	0.02065	0.48834	no
LOC797436	NC_007135.6:26807628-26814507	control	10	OK	0.444879	1.05643	1.24771	2.46014	0.0141	0.399242	no
LOC797571	NC_007136.6:13086974-13105721	control	10	OK	4.44109	8.52797	0.94129	2.45123	0.0161	0.428007	no
LOC797750	NC_007114.6:56970574-57113857	control	10	OK	2.32565	3.65857	0.653647	2.04841	0.0385	0.659786	no
LOC798606	NC_007135.6:28567018-28576780	control	10	OK	1.67281	0.143693	-3.54121	-2.35352	0.0053	0.218951	no
LOC798614	NC_007118.6:20215675-20250805	control	10	OK	2.55683	1.32735	-0.945802	-2.24505	0.02265	0.51162	no
LOC799098	NC_007128.6:33549977-33599861	control	10	OK	2.13335	0.952821	-1.16284	-2.50514	0.01795	0.453432	no
LOC799182	NC_007131.6:18425978-18431799	control	10	OK	0.53622	0.186809	-1.52126	-2.41562	0.02795	0.566631	no
LOC799656	NC_007127.6:55112858-55119030	control	10	OK	1.53902	3.58331	1.21928	2.21869	0.0356	0.634951	no
lonp1	NC_007133.6:3143890-3165564	control	10	OK	8.36852	15.7011	0.907824	2.93008	0.004	0.181524	no
lonrf1l	NC_007119.6:13731808-13750606	control	10	OK	8.60227	31.0265	1.85071	5.99566	5e-05	0.00654421	yes
loxl1	NC_007129.6:50127739-50156127	control	10	OK	6.21146	1.74541	-1.83137	-3.55684	0.00145	0.0933211	no
loxl2	NC_007124.6:15103406-15273592	control	10	OK	5.37609	3.30484	-0.701977	-2.11013	0.0309	0.594263	no
loxl4	NC_007124.6:40056606-40112856	control	10	OK	1.59772	0.78259	-1.02969	-2.28691	0.02625	0.549179	no
lppr5b	NC_007135.6:30087383-30194065	control	10	OK	2.10266	1.00569	-1.06403	-2.00806	0.0368	0.645248	no
lrata	NC_007112.6:25005977-25007207	control	10	OK	13.4635	7.71607	-0.80312	-2.23162	0.0279	0.566273	no
lrit1b	NC_007123.6:48952070-48955235	control	10	OK	3.10828	1.34133	-1.21245	-2.85495	0.0071	0.267148	no
lrrc58a	NC_007112.6:46794871-46801729	control	10	OK	0.332428	3.04812	3.1968	4.56912	0.0044	0.193288	no
lrrtm4l2	NC_007119.6:6354096-6427717	control	10	OK	0.929491	0.40453	-1.20019	-2.26289	0.0196	0.47638	no
lye	NC_007130.6:17461611-17463685	control	10	OK	94.1623	154.315	0.712661	2.33637	0.02115	0.494651	no
lyve1b	NC_007129.6:16755240-16759610	control	10	OK	4.22566	1.55886	-1.43869	-2.89373	0.0089	0.306997	no
mab21l3	NC_007120.6:36066683-36084526	control	10	OK	1.06086	0.417294	-1.3461	-1.75662	0.0468	0.713634	no
maf	NC_007129.6:29424465-29427318	control	10	OK	8.53983	4.6264	-0.884317	-2.66553	0.0088	0.305504	no
mafa	NC_007117.6:32714672-32718627	control	10	OK	10.2594	5.1422	-0.996482	-3.17342	0.00225	0.124942	no
mafk	NC_007114.6:42251661-42275777	control	10	OK	3.23433	4.97918	0.622442	1.76633	0.0489	0.727116	no
mag	NC_007126.6:34030795-34075800	control	10	OK	4.23069	1.50553	-1.49063	-3.71946	0.0001	0.0119493	yes
mamdc2a	NC_007116.6:51862094-51922492	control	10	OK	1.52644	0.72079	-1.08252	-2.03144	0.0292	0.578416	no
map3k14	NC_007135.6:36478935-36504318	control	10	OK	3.92565	2.12696	-0.884141	-2.32943	0.01495	0.411172	no
map7d2a	NC_007116.6:23453771-23496416	control	10	OK	7.35674	4.5728	-0.685989	-2.09964	0.03	0.58515	no
mapk1	NC_007116.6:12601376-12666914	control	10	OK	1.70668	0.505192	-1.75629	-3.36755	0.00315	0.156879	no
marco	NC_007120.6:796044-813950	control	10	OK	1.72285	0.786893	-1.13056	-2.10967	0.0323	0.608322	no
mat2ab	NC_007116.6:68424615-68439815	control	10	OK	5.61719	13.1923	1.23177	3.83254	0.0002	0.0215787	yes
matn1	NC_007130.6:43719072-43742685	control	10	OK	5.73267	10.2787	0.842374	2.67724	0.007	0.264666	yes
matn4	NC_007117.6:52759111-52847817	control	10	OK	131.096	74.2784	-0.819607	-2.33376	0.0168	0.438296	no
mavs	NC_007124.6:15051159-15082589	control	10	OK	2.95916	1.66016	-0.833861	-2.23625	0.02545	0.541503	no
mb	NC_007112.6:54460252-54467434	control	10	OK	75.8144	44.0345	-0.783838	-2.54336	0.01055	0.331721	no
mbpa	NC_007130.6:22229723-22248302	control	10	OK	3.94497	1.16777	-1.75625	-3.76783	0.0004	0.0363284	yes
mdh1b	NC_007128.6:24312606-24425944	control	10	OK	52.6672	30.7065	-0.77836	-2.46367	0.0112	0.344124	no
mdm2	NC_007115.6:23404712-23415152	control	10	OK	17.0731	32.0067	0.906654	2.83321	0.00365	0.171648	no
mef2a	NC_007118.6:15411000-15472839	control	10	OK	1.86195	0.978875	-0.927616	-1.96121	0.04565	0.708289	no
meox1	NC_007123.6:27370856-27377378	control	10	OK	7.25101	4.20115	-0.787399	-2.24978	0.0251	0.537321	no
meox2	NC_007126.6:34566965-34610479	control	10	OK	1.12779	0.526683	-1.0985	-2.43096	0.016	0.427295	no
meox2b	NC_007130.6:31570333-31630786	control	10	OK	2.29701	1.17448	-0.967739	-1.93137	0.0491	0.727646	no
mettl11b	NC_007131.6:34552686-34565517	control	10	OK	8.19911	3.16322	-1.37407	-3.19742	0.0014	0.0910234	no
mfsd4b	NC_007134.6:18176759-18188547	control	10	OK	0.864839	0.140015	-2.62685	-3.16575	0.0208	0.489079	no
MGC174152	NC_007123.6:16752756-16755251	control	10	OK	1.5667	3.76389	1.26449	2.57175	0.0152	0.414144	no
MGC174857	NC_007123.6:16797536-16801288	control	10	OK	0.456685	2.398	2.39256	3.64596	0.00595	0.238487	no
mgea5	NC_007124.6:11856257-11873578	control	10	OK	25.9016	61.6598	1.25129	3.75718	0.0001	0.0119493	yes
mgst1.2	NC_007115.6:12720115-12726664	control	10	OK	8.08544	28.2494	1.80482	5.67845	5e-05	0.00654421	yes
mhc1zba	NC_007112.6:46461957-46470764	control	10	OK	9.97397	15.5661	0.642165	2.02027	0.04035	0.67594	no
mia	NC_007116.6:56983241-56984875	control	10	OK	27.6736	13.3928	-1.04706	-2.61195	0.0113	0.346588	no
mibp	NC_007133.6:4733937-4738182	control	10	OK	22.6441	43.9068	0.955309	3.12404	0.002	0.115075	yes
micall2a	NC_007114.6:42395994-42429478	control	10	OK	1.51319	3.16118	1.06287	2.68344	0.00555	0.226209	no
mipa	NC_007134.6:27141683-27146233	control	10	OK	12.5085	1.83822	-2.76653	-7.46956	5e-05	0.00654421	yes
mir21-1	NC_007121.6:28311626-28312801	control	10	OK	1.67597	4.5448	1.43922	2.43719	0.0085	0.299545	no
mir363	NC_007125.6:31126356-31126483	control	10	OK	0	25.3956	inf	#NAME?	0.01025	0.326244	no
mknk1	NC_007122.6:13118896-13132092	control	10	OK	7.99694	13.8968	0.797235	2.50986	0.01025	0.326244	no
mknk2b	NC_007119.6:20406765-20420076	control	10	OK	23.6094	50.2249	1.08904	3.22119	0.00075	0.0584825	no
mmp11b	NC_007132.6:15538486-15578975	control	10	OK	9.38726	5.86288	-0.679094	-2.11864	0.02925	0.578416	yes
mmp13a	NC_007121.6:38649899-38676124	control	10	OK	1.32003	0.633454	-1.05926	-2.2394	0.02595	0.545675	yes
mnx2a	NC_007120.6:7745590-7751291	control	10	OK	3.60403	1.70751	-1.07772	-2.17507	0.0298	0.583688	no
mpeg1.2	NC_007119.6:19325654-19329417	control	10	OK	1.09819	2.63541	1.2629	2.86503	0.00665	0.255853	no
mpp1	NC_007132.6:36278311-36338832	control	10	OK	14.4987	22.4557	0.631154	1.99691	0.04335	0.698297	no
mpz	NC_007113.6:44406501-44429948	control	10	OK	1.8208	0.602911	-1.59456	-3.12556	0.00315	0.156879	no
mrc1a	NC_007118.6:58589405-58649989	control	10	OK	4.5497	2.28824	-0.991535	-2.96438	0.0023	0.127013	no
msmo1	NC_007112.6:20223613-20235800	control	10	OK	5.13433	11.0845	1.1103	3.09711	0.00255	0.136304	no
mthfd1a	NC_007131.6:27747724-27783742	control	10	OK	16.0615	8.95729	-0.84247	-2.72967	0.0063	0.247279	no
murca	NC_007113.6:42342173-42349182	control	10	OK	78.4284	41.9993	-0.901011	-2.93467	0.0039	0.178373	no
murcb	NC_007135.6:33811655-33817205	control	10	OK	53.1666	24.5369	-1.11557	-3.61692	0.0005	0.0436552	yes
mybpc1	NC_007115.6:17737774-17834421	control	10	OK	2.54508	1.45168	-0.809994	-1.84323	0.0427	0.694053	no
mybpc2b	NC_007135.6:38414423-38460934	control	10	OK	33.9529	13.9707	-1.28113	-4.1485	5e-05	0.00654421	yes
mybpha	NC_007134.6:6143535-6192041	control	10	OK	7.47043	2.96898	-1.33122	-3.60436	0.0006	0.0496031	yes
mybphb	NC_007117.6:55022673-55190198	control	10	OK	555.91	218.557	-1.34684	-3.52614	0.00075	0.0584825	no
myh11a	NC_007117.6:8264315-8345334	control	10	OK	1.27046	0.509745	-1.3175	-3.14385	0.00295	0.15045	no
myh6	NC_007131.6:53772080-53778701	control	10	OK	1.34021	0.706047	-0.924623	-2.2832	0.0232	0.517001	no
myh9a	NC_007117.6:7578636-7619460	control	10	OK	37.6133	63.6971	0.759985	2.2001	0.0259	0.545278	no
myha	NC_007116.6:31646562-31657200	control	10	OK	2.5918	0.929104	-1.48004	-3.96982	0.0004	0.0363284	yes
myhb	NC_007117.6:40748130-40758624	control	10	OK	8.30206	3.2507	-1.35272	-4.29984	5e-05	0.00654421	yes
myhc4,myhz2	NC_007116.6:31606135-31633711	control	10	OK	404.092	136.436	-1.56646	-3.40256	0.0011	0.0774124	no
myhz1.1,myhz1.2,ns:zf-e68	NC_007116.6:31662343-31708978	control	10	OK	1346.6	362.786	-1.89213	-2.79063	0.0098	0.32461	no
myl1	NC_007120.6:39184436-39195505	control	10	OK	1733.31	817.573	-1.08411	-2.51631	0.0142	0.400938	no
myl2b	NC_007119.6:4277224-4302769	control	10	OK	1.33749	0.574154	-1.22002	-2.09522	0.0442	0.701336	no
myl4	NC_007114.6:22092122-22111894	control	10	OK	41.0258	21.1555	-0.955499	-2.99992	0.00245	0.132068	no
myl9a	NC_007134.6:42920813-42930752	control	10	OK	18.9306	9.7387	-0.958919	-2.57035	0.01095	0.340325	no
mylipb	NC_007127.6:25621086-25633706	control	10	OK	4.00631	7.44025	0.893076	2.44512	0.01705	0.442019	no
mylka	NC_007120.6:4055592-4177096	control	10	OK	2.07811	1.10634	-0.909477	-2.44286	0.01545	0.418028	no
mylkb	NC_007117.6:13224234-13265148	control	10	OK	1.20476	0.411877	-1.54846	-3.09531	0.0061	0.241459	no
myo5aa	NC_007129.6:38918885-39061434	control	10	OK	4.62327	7.17233	0.63353	1.99092	0.0466	0.712617	no
myom1a	NC_007113.6:30932628-30976510	control	10	OK	53.0285	22.8519	-1.21445	-3.63698	0.00015	0.0170511	yes
myom1b	NC_007118.6:71497642-71566515	control	10	OK	29.9655	14.6212	-1.03524	-3.21374	0.00085	0.0639308	no
myom2	NC_007124.6:6832371-6859680	control	10	OK	81.6767	24.8111	-1.71894	-5.52547	5e-05	0.00654421	yes
myoz1a	NC_007124.6:22134619-22147965	control	10	OK	36.7943	18.8872	-0.962073	-3.13525	0.00185	0.109875	no
myoz1b	NC_007123.6:26293885-26317801	control	10	OK	182.282	97.4316	-0.903709	-2.86193	0.00365	0.171648	no
myoz2a	NC_007118.6:69588476-69616463	control	10	OK	18.9498	9.92112	-0.933608	-2.79118	0.00425	0.189312	no
nabp1a	NC_007120.6:24403892-24407878	control	10	OK	12.7926	8.11114	-0.657332	-2.00674	0.0409	0.679948	no
nadka	NC_007119.6:53173134-53196930	control	10	OK	3.63362	0.339906	-3.4182	-2.5824	0.04985	0.731759	no
nbeal2	NC_007127.6:16449095-16614455	control	10	OK	0.61409	1.08862	0.825982	2.18527	0.0254	0.541097	no
ndnf	NC_007134.6:2042645-2084638	control	10	OK	20.3978	12.9225	-0.658535	-2.14475	0.03275	0.611045	no
ndp	NC_007120.6:33924579-33940386	control	10	OK	2.62233	1.36482	-0.942138	-1.9947	0.04925	0.728363	no
ndrg1a	NC_007130.6:35372846-35392717	control	10	OK	39.5963	24.3487	-0.701522	-2.27296	0.0174	0.4463	no
ndufa4	NC_007123.6:9842970-9846483	control	10	OK	117.825	73.1087	-0.688534	-2.25014	0.0249	0.535495	no
neb	NC_007120.6:22994265-23082353	control	10	OK	13.6513	6.47092	-1.07699	-3.26855	0.00055	0.0465129	yes
neflb	NC_007119.6:6831203-6833833	control	10	OK	10.8658	6.37035	-0.770348	-2.33557	0.021	0.492459	no
nek6	NC_007132.6:8263318-8304816	control	10	OK	5.2521	8.42634	0.682012	2.0134	0.0418	0.688211	no
nenf	NC_007128.6:45412553-45419711	control	10	OK	11.2168	17.8357	0.669111	2.00556	0.0438	0.701336	no
neto2b	NC_007129.6:7538917-7553485	control	10	OK	0.518624	0.141468	-1.87421	-2.05417	0.04255	0.693063	no
nexn	NC_007119.6:18481860-18502206	control	10	OK	22.4883	11.8953	-0.918778	-2.97779	0.0029	0.148441	no
nfatc1	NC_007130.6:22632426-22720142	control	10	OK	3.10841	1.85395	-0.745575	-1.96975	0.0426	0.693233	no
nfe2l2b	NC_007117.6:10649327-10667495	control	10	OK	2.08006	4.97541	1.25819	3.05695	0.00235	0.128961	no
nfil3-6	NC_007114.6:13947693-13953685	control	10	OK	1.75131	3.66711	1.06621	3.00207	0.00345	0.166034	no
nfybb	NC_007136.6:28380757-28403421	control	10	OK	16.5599	25.9994	0.65078	1.98335	0.0469	0.71393	no
nmrk2	NC_007113.6:55859082-55866489	control	10	OK	32.4235	15.5239	-1.06255	-3.14658	0.0013	0.0873607	no
nmt1b	NC_007123.6:15624641-15633989	control	10	OK	6.19187	13.4472	1.11886	3.12324	0.00215	0.121411	no
nog3	NC_007123.6:32273983-32275586	control	10	OK	10.7507	6.31731	-0.767056	-1.87921	0.04935	0.728363	no
notum2	NC_007117.6:10707833-10728616	control	10	OK	6.30311	3.27602	-0.944118	-2.63465	0.00695	0.264059	no
noxo1a	NC_007114.6:61921203-61932275	control	10	OK	1.93649	4.58519	1.24354	3.12845	0.0016	0.0998545	no
npas4a	NC_007125.6:30296640-30302505	control	10	OK	2.11804	3.88207	0.874098	2.55767	0.01105	0.341764	no
npc1	NC_007113.6:3992873-4036082	control	10	OK	19.7294	32.0223	0.698735	2.23979	0.0244	0.530444	no
nrap	NC_007123.6:30471650-30503790	control	10	OK	6.20764	3.00013	-1.04902	-3.33767	0.0008	0.0609558	no
nrxn1b	NC_007124.6:598968-681239	control	10	OK	0.952342	0.547875	-0.797633	-1.9241	0.045	0.705403	no
nt5c2l1	NC_007121.6:17502923-17527334	control	10	OK	18.8948	30.2664	0.679732	2.21426	0.02265	0.51162	no
ntf7	NC_007134.6:4993704-5039938	control	10	OK	1.06368	2.50524	1.23588	2.15551	0.0216	0.499174	no
nub1	NC_007135.6:41409638-41440084	control	10	OK	0.346533	1.00941	1.54244	2.55206	0.01745	0.447092	no
obsl1b	NC_007120.6:41943077-42000121	control	10	OK	3.42962	2.17382	-0.657815	-2.02243	0.033	0.613096	no
oma1	NC_007131.6:9066840-9107824	control	10	OK	2.42656	1.22931	-0.981064	-2.15752	0.0293	0.579078	no
opn1lw2	NC_007122.6:25243484-25245575	control	10	OK	46.5324	6.79924	-2.77479	-8.31025	5e-05	0.00654421	yes
opn1mw1	NC_007117.6:41184345-41186287	control	10	OK	11.5688	1.14217	-3.34039	-7.28947	5e-05	0.00654421	yes
opn1mw2	NC_007117.6:41188801-41191928	control	10	OK	1.72963	0.302532	-2.51531	-3.74254	0.00645	0.250498	no
opn1sw1	NC_007115.6:13578815-13581469	control	10	OK	27.6402	5.00583	-2.46509	-7.18491	5e-05	0.00654421	yes
opn1sw2	NC_007122.6:25232154-25242421	control	10	OK	15.2293	1.98754	-2.93779	-6.97509	5e-05	0.00654421	yes
opn5	NC_007131.6:36098620-36135951	control	10	OK	2.56698	1.11891	-1.19798	-2.28236	0.01775	0.450983	no
optn	NC_007115.6:8007821-8018689	control	10	OK	10.3597	16.0846	0.634691	2.02121	0.03725	0.648684	no
osgn1	NC_007117.6:50695104-50705470	control	10	OK	15.5194	27.6702	0.834262	2.6646	0.007	0.264666	no
otc	NC_007120.6:30457292-30463666	control	10	OK	2.67181	0.278396	-3.26261	-4.41704	0.0079	0.286474	no
otos	NC_007135.6:26157736-26159618	control	10	OK	7.18679	2.75175	-1.385	-3.07346	0.00285	0.146955	no
otud1	NC_007135.6:9157263-9159625	control	10	OK	3.14896	5.66264	0.846598	2.30225	0.02555	0.542148	no
otx1a	NC_007112.6:50275672-50286161	control	10	OK	4.13218	6.97601	0.7555	1.96894	0.04625	0.711578	no
p4ha2	NC_007132.6:43102683-43136945	control	10	OK	13.4902	8.25629	-0.708344	-2.14987	0.0249	0.535495	no
pald1b	NC_007124.6:30038985-30069218	control	10	OK	2.30344	0.833556	-1.46644	-3.29435	0.00065	0.0528629	no
parvb	NC_007136.6:4907286-4937097	control	10	OK	30.7434	19.7514	-0.638323	-2.01425	0.0393	0.666159	no
pax1b	NC_007131.6:48863964-48870401	control	10	OK	1.88995	0.885416	-1.09392	-2.03978	0.04885	0.726864	no
pbld1,pbld2	NC_007124.6:22713421-22731823	control	10	OK	29.3625	16.8744	-0.799134	-2.37774	0.01465	0.407563	no
pcdh10a	NC_007112.6:12076615-12110752	control	10	OK	0.77026	2.18643	1.50516	2.82307	0.003	0.152556	no
pcdh15b	NC_007123.6:6509287-6872271	control	10	OK	11.0646	40.8566	1.88462	5.86059	5e-05	0.00654421	no
pcdh20	NC_007122.6:42622690-42626858	control	10	OK	5.03818	9.50534	0.915836	2.24468	0.0283	0.569767	no
pcdh2ab7	NC_008805468.1:13775-16174	control	10	OK	10.7833	24.1376	1.16249	3.60892	0.00015	0.0170511	no
pcdh9	NC_007117.6:4712794-5241097	control	10	OK	27.0922	44.0063	0.699831	2.09181	0.0324	0.608732	yes
pdia4	NC_007135.6:17190345-17197039	control	10	OK	43.4566	26.8378	-0.695307	-2.27837	0.02315	0.517001	no
pdip5	NC_007131.6:31314622-31349971	control	10	OK	67.3692	37.926	-0.828901	-2.46285	0.01135	0.347969	no
pdk1	NC_007120.6:3125023-3144036	control	10	OK	11.4875	7.49859	-0.615368	-1.99818	0.04205	0.689894	no
pdpk1a	NC_007114.6:47331063-47356110	control	10	OK	1.69484	2.87093	0.760368	1.93237	0.0465	0.711865	no
pdzk1	NC_007120.6:5884091-5914092	control	10	OK	2.59588	0.890039	-1.54428	-3.0304	0.0044	0.193288	no
per2	NC_007113.6:48455435-48521207	control	10	OK	3.2772	14.7884	2.17393	6.79175	5e-05	0.00654421	yes
per3	NC_007122.6:39694906-39756931	control	10	OK	6.22417	15.6788	1.33287	3.08764	0.003	0.152556	no
pfklb	NC_007122.6:44869647-44895862	control	10	OK	14.2639	8.87091	-0.685214	-2.09776	0.02905	0.578053	no
pfkma	NC_007134.6:27627244-27645126	control	10	OK	26.3785	14.072	-0.906534	-2.9657	0.0037	0.172493	no
pfkmb	NC_007117.6:39742176-39774702	control	10	OK	22.971	9.73499	-1.23856	-3.96485	5e-05	0.00654421	yes
pgam2	NC_007132.6:18965040-18969995	control	10	OK	125.574	65.3175	-0.942995	-3.07209	0.00225	0.124942	no
pgr	NC_007129.6:41829600-41849528	control	10	OK	0.218809	0.555487	1.34408	2.10426	0.0464	0.711578	no
phex	NC_007135.6:25259411-25297391	control	10	OK	12.089	6.68674	-0.854316	-2.7021	0.0061	0.241459	no
phgdh	NC_007120.6:48489032-48516779	control	10	OK	48.352	107.296	1.14995	3.65494	0.0005	0.0436552	yes
phlda2	NC_007136.6:23427248-23428532	control	10	OK	24.6338	39.6893	0.688113	2.17904	0.0281	0.568191	no
pign	NC_007135.6:23542235-23570983	control	10	OK	2.2724	1.19378	-0.928684	-2.13806	0.0308	0.593481	no
pim1	NC_007119.6:8889311-8895484	control	10	OK	8.39931	16.0512	0.934335	2.96907	0.0038	0.1761	no
pip5kl1	NC_007116.6:31090925-31112333	control	10	OK	0.77026	2.18643	1.50516	2.82307	0.003	0.152556	no
pir,zgc:113276	NC_007122.6:29670438-29699816	control	10	OK	11.0646	40.8566	1.88462	5.86059	5e-05	0.00654421	yes
pitpnaa	NC_007126.6:28477746-28492135	control	10	OK	24.6784	37.3105	0.596335	1.93429	0.04535	0.707555	no
pkd2l1	NC_007124.6:25324764-25340933	control	10	OK	1.48101	0.42947	-1.78596	-3.33448	0.0043	0.19081	no
pkhd1l1	NC_007130.6:23264534-23335441	control	10	OK	0.831242	1.62781	0.969596	2.85755	0.0039	0.178373	no
pkmb	NC_007136.6:28716978-28752871	control	10	OK	180.97	90.5033	-0.999705	-3.00438	0.00325	0.159702	no
pla2g7	NC_007131.6:35559397-35578705	control	10	OK	9.31661	14.3634	0.62452	1.93275	0.04905	0.727646	no
plbd1	NC_007114.6:3955276-3983944	control	10	OK	5.04831	9.54403	0.918797	2.57475	0.00825	0.294589	no
plcd1a	NC_007135.6:20228024-20305541	control	10	OK	10.7648	21.0948	0.97057	2.92551	0.0024	0.130884	no
plek2	NC_007124.6:32993033-33004161	control	10	OK	0.796622	3.63812	2.19122	5.01842	5e-05	0.00654421	yes
plekhf1	NC_007118.6:45703180-45704590	control	10	OK	2.39359	5.74862	1.26404	2.80707	0.00795	0.287246	no
plekhn1	NC_007134.6:23305501-23326465	control	10	OK	2.47837	4.3745	0.819724	2.23187	0.02735	0.560963	no
plin2	NC_007126.6:17094611-17113982	control	10	OK	1.68562	5.24318	1.63716	3.83522	0.00035	0.0331638	yes
plod2	NC_007135.6:5205894-5283760	control	10	OK	8.3024	4.96788	-0.740898	-2.28726	0.01785	0.452211	no
pmp22b	NC_007123.6:37100590-37124929	control	10	OK	66.4063	38.7554	-0.776921	-2.44517	0.0153	0.415575	no
pmt	NC_007125.6:1422192-1432756	control	10	OK	3.56214	7.57327	1.08817	2.61401	0.0121	0.363483	no
pnp4b	NC_007127.6:36854039-36880633	control	10	OK	2.23003	0.895819	-1.31578	-2.27541	0.03095	0.595061	no
poc1bl	NC_007130.6:34581900-34634231	control	10	OK	5.77482	9.29496	0.686673	2.08961	0.02915	0.578071	no
ponzr3	NC_007118.6:22398117-22425830	control	10	OK	57.969	14.4175	-2.00746	-4.70907	5e-05	0.00654421	yes
ponzr4	NC_007118.6:22398117-22425830	control	10	OK	30.8192	4.87918	-2.65912	-4.7156	5e-05	0.00654421	yes
popdc3	NC_007127.6:7736512-7741358	control	10	OK	5.39123	2.77678	-0.957201	-2.10179	0.03085	0.59379	no
pou2f1a	NC_007126.6:45544-61490	control	10	OK	9.26181	16.4217	0.826233	2.23627	0.0233	0.517619	no
ppox	NC_007127.6:42337921-42402829	control	10	OK	2.38875	5.82746	1.28661	2.63777	0.0065	0.251742	no
ppp1r15a	NC_007118.6:71262953-71268297	control	10	OK	22.6441	43.9068	0.955309	3.12404	0.002	0.115075	no
ppp1r3g	NC_007135.6:2827471-2830331	control	10	OK	3.53634	2.08569	-0.761731	-1.9849	0.04925	0.728363	no
ppp6r2	NC_007129.6:6852989-6897212	control	10	OK	2.54503	5.22433	1.03756	3.21122	0.0011	0.0774124	no
prdm15	NC_007121.6:33325388-33357790	control	10	OK	3.09736	1.85212	-0.741864	-1.97492	0.0464	0.711578	no
prdm8	NC_007124.6:31162248-31165908	control	10	OK	4.79861	2.7508	-0.802764	-2.11504	0.03225	0.608035	no
prdx1	NC_007113.6:6194608-6203807	control	10	OK	46.0163	207.295	2.17147	6.85859	5e-05	0.00654421	yes
prelp	NC_007122.6:20916066-20925096	control	10	OK	3.20787	0.561006	-2.51553	-4.54401	0.0006	0.0496031	yes
prkcq	NC_007115.6:25402031-25454177	control	10	OK	1.94976	0.782077	-1.31791	-3.13205	0.0022	0.123537	no
prlh	NC_007120.6:24214157-24214535	control	10	OK	2.22318	0	#NAME?	#NAME?	0.00415	0.186041	no
prom1b	NC_007112.6:22022185-22066471	control	10	OK	8.3024	4.96788	-0.740898	-2.28726	0.01785	0.452211	no
prp	NW_003336732.1:30253-156054	control	10	OK	4.62017	2.27931	-1.01935	-3.07382	0.0021	0.119067	no
prph2a	NC_007123.6:34795943-34800811	control	10	OK	1.96575	0.372979	-2.39792	-4.27366	0.00065	0.0528629	no
prph2b	NC_007124.6:3119599-3125423	control	10	OK	1.83276	0.342257	-2.42087	-4.13073	0.0019	0.11087	no
prr15lb	NC_007123.6:28693746-28703910	control	10	OK	1.32038	0.35406	-1.89889	-2.0602	0.03635	0.641466	no
psap	NC_007124.6:4876325-4938259	control	10	OK	166.395	406.978	1.29034	3.25741	0.00115	0.0798874	no
psat1	NC_007116.6:68713692-68727226	control	10	OK	44.9263	98.6094	1.13417	3.64757	0.00025	0.0256683	yes
psme1	NC_007135.6:12801449-12810063	control	10	OK	2.64979	6.2538	1.23885	2.73317	0.00765	0.280165	no
ptgdsb,zgc:153154	NC_007135.6:16877093-16884916	control	10	OK	111.739	179.084	0.68051	2.1763	0.0261	0.547514	no
ptger1b	NC_007114.6:13677866-13688169	control	10	OK	0.900305	0.34146	-1.3987	-2.12517	0.0191	0.469771	no
ptgs2b	NC_007131.6:34218943-34224518	control	10	OK	6.27139	3.50695	-0.838568	-2.35185	0.0143	0.402787	no
ptprb	NC_007115.6:72814648-72914124	control	10	OK	3.96617	2.10795	-0.911906	-1.86008	0.04835	0.724505	no
pvalb3	NC_007123.6:17583343-17585643	control	10	OK	26.4689	16.0351	-0.723061	-2.01901	0.04095	0.680456	no
pvalb6	NC_007114.6:24222038-24304359	control	10	OK	15.7735	7.69128	-1.03621	-2.74558	0.00465	0.200992	no
pvalb8	NC_007114.6:60921630-60930162	control	10	OK	45.1784	23.2661	-0.957406	-2.9893	0.00245	0.132068	no
pxmp2	NC_007116.6:19610373-19619288	control	10	OK	2.64908	4.77056	0.848666	1.9721	0.0433	0.697813	no
qdpra	NC_007125.6:47886141-47910067	control	10	OK	24.3395	53.7701	1.14351	2.8086	0.0039	0.178373	no
rasd1	NC_007123.6:1370085-1371688	control	10	OK	13.7176	28.9866	1.07935	3.3739	0.00075	0.0584825	no
rassf10b	NC_007118.6:65715128-65717724	control	10	OK	6.67507	4.00724	-0.736176	-2.00965	0.04075	0.679552	no
rbm4.2	NC_007118.6:22524964-22530092	control	10	OK	42.5879	24.5308	-0.795851	-2.57824	0.00765	0.280165	no
rbp2a	NC_007126.6:5815658-5827065	control	10	OK	109.022	33.0909	-1.72011	-5.26097	5e-05	0.00654421	yes
rcn3	NC_007114.6:32400848-32410049	control	10	OK	54.026	23.505	-1.20069	-3.21567	0.0015	0.095747	no
rcor2	NC_007118.6:24708675-24724497	control	10	OK	22.0191	13.242	-0.733632	-2.36812	0.01515	0.413909	no
rcv1	NC_007127.6:14021571-14031295	control	10	OK	30.8739	14.2724	-1.11316	-3.58267	0.0004	0.0363284	yes
rcvrna	NC_007114.6:49405367-49408466	control	10	OK	18.7612	6.17579	-1.60305	-4.20409	5e-05	0.00654421	yes
rdh1	NC_007120.6:48977094-49003365	control	10	OK	8.72784	3.78377	-1.2058	-3.13049	0.00175	0.106095	no
rdh12l	NC_007135.6:32659263-32668193	control	10	OK	3.04291	7.87509	1.37185	3.31444	0.00085	0.0639308	no
reep6	NC_007122.6:7252114-7264530	control	10	OK	1.69623	0.63878	-1.40894	-2.11143	0.04295	0.694891	no
rela	NC_007118.6:629700-667788	control	10	OK	5.06249	8.38639	0.728203	2.24175	0.0229	0.514116	no
rfesd	NC_007132.6:11737207-11741824	control	10	OK	0.342171	2.19904	2.68408	3.31897	0.0193	0.472698	no
rgs5a	NC_007117.6:35403978-35417894	control	10	OK	6.36841	3.46545	-0.877891	-2.3707	0.0139	0.396464	no
rgs9a	NC_007114.6:36236947-36260149	control	10	OK	1.1921	0.244347	-2.2865	-3.01624	0.00645	0.250498	no
rhbdd1	NC_007126.6:36075096-36086933	control	10	OK	2.11874	4.10536	0.954298	2.14807	0.0327	0.610438	no
rho	NC_007119.6:53668766-53670315	control	10	OK	54.6417	33.6991	-0.697293	-2.27596	0.023	0.51504	no
rhoua	NC_007124.6:24203479-24248819	control	10	OK	5.02964	8.7407	0.797293	2.29087	0.0157	0.421696	no
rhpn2	NC_007118.6:38078355-38122159	control	10	OK	7.8942	12.2907	0.638697	1.96375	0.03935	0.666362	no
riok3	NC_007135.6:36351576-36365138	control	10	OK	26.756	52.1439	0.962636	3.14059	0.0026	0.138133	no
rnasel3	NC_007125.6:38313954-38316087	control	10	OK	48.7903	20.6648	-1.23942	-3.85808	5e-05	0.00654421	yes
rnf151	NC_007123.6:18336791-18344381	control	10	OK	1.19009	0.222427	-2.41967	-3.1293	0.0168	0.438296	no
rnf213a	NC_007114.6:56631731-56746415	control	10	OK	1.02346	1.82443	0.833995	2.60115	0.0095	0.318286	no
rnf31	NC_007113.6:28156564-28199165	control	10	OK	3.34438	5.51595	0.721869	2.116	0.03205	0.606551	no
rnf38	NC_007112.6:18170122-18244112	control	10	OK	18.0299	27.4792	0.607949	1.91315	0.0477	0.719383	no
rreb1b	NC_007113.6:21342171-21404153	control	10	OK	5.50017	3.52676	-0.641133	-2.0633	0.03685	0.645248	no
rs1a	NC_007122.6:29997217-30004914	control	10	OK	40.1912	23.0107	-0.804577	-2.59936	0.00995	0.325992	no
rsrp1	NC_007124.6:45331503-45338399	control	10	OK	82.3641	49.0591	-0.747495	-2.20751	0.02485	0.535407	no
rtn2a	NC_007126.6:9031743-9067087	control	10	OK	34.8607	17.228	-1.01685	-2.47301	0.0114	0.349196	no
rtn2b	NC_007132.6:21337653-21349484	control	10	OK	24.512	13.6463	-0.844977	-2.66275	0.00535	0.220237	no
rwdd3	NC_007113.6:19982813-19991192	control	10	OK	1.61246	3.48752	1.11294	2.32805	0.0249	0.535495	no
ryr3	NC_007131.6:29328632-29517828	control	10	OK	5.8617	3.39657	-0.787241	-2.24725	0.02295	0.514414	no
s100a10a	NC_007130.6:8687957-8689348	control	10	OK	17.9573	7.63769	-1.23337	-3.31243	0.0015	0.095747	no
s100t	NC_007127.6:22766427-22767996	control	10	OK	79.731	48.381	-0.720699	-2.33432	0.01965	0.477264	no
s100z	NC_007132.6:7258021-7305746	control	10	OK	3.13639	9.73446	1.63399	3.61224	0.00105	0.0749482	no
s1pr3	NC_007132.6:2973356-2980132	control	10	OK	1.6382	0.754544	-1.11843	-2.21985	0.0226	0.51148	no
s1pr3a	NC_007133.6:21449377-21453045	control	10	OK	1.70361	0.627999	-1.43976	-2.35447	0.02115	0.494651	no
safb	NC_007133.6:15669475-15678434	control	10	OK	51.0376	29.0872	-0.811177	-2.58942	0.0061	0.241459	no
sagb	NC_007126.6:45625522-45647702	control	10	OK	32.25	12.7042	-1.34399	-3.94182	0.00015	0.0170511	yes
samd11	NC_007134.6:23093679-23197351	control	10	OK	13.0257	7.75406	-0.748334	-2.38	0.0151	0.413349	no
sardh	NC_007121.6:10428320-10603584	control	10	OK	29.2383	49.4638	0.758513	2.41348	0.0133	0.385794	no
sat1a.1	NC_007116.6:3999184-4011697	control	10	OK	20.8762	12.1912	-0.776018	-1.98398	0.03635	0.641466	no
sat1a.2	NC_007116.6:4033410-4041340	control	10	OK	41.006	77.7537	0.923076	3.01922	0.003	0.152556	no
satb2	NC_007120.6:32745523-32805206	control	10	OK	3.55032	1.74711	-1.02298	-3.05955	0.0021	0.119067	no
sb:cb252	NC_007125.6:11151473-11154986	control	10	OK	65.1682	129.576	0.991561	3.23183	0.00135	0.0893488	no
sb:cb288	NC_007119.6:40463195-40483544	control	10	OK	7.7714	4.21857	-0.881421	-2.39005	0.01455	0.40672	no
sbno2a	NC_007113.6:57072217-57133495	control	10	OK	2.29781	4.55602	0.987515	2.69377	0.0081	0.291313	no
scara3	NC_007131.6:39380987-39397856	control	10	OK	2.30159	1.05387	-1.12694	-2.61832	0.00935	0.315373	no
scd	NC_007123.6:48407390-48422876	control	10	OK	0.583036	1.6293	1.48259	3.03361	0.00635	0.248406	no
scpp5	NC_007112.6:43208768-43214402	control	10	OK	3.05505	1.32211	-1.20836	-2.09647	0.0461	0.711328	no
scrn2	NC_007131.6:14739447-14784917	control	10	OK	8.31766	4.3829	-0.924293	-2.51151	0.0125	0.371357	no
sdsl	NC_007128.6:14597937-14605774	control	10	OK	0.914223	0.157592	-2.53635	-2.5095	0.0362	0.640433	no
sepw2b	NC_007114.6:19954004-19956471	control	10	OK	39.6397	105.206	1.4082	4.58154	5e-05	0.00654421	yes
serp1	NC_007129.6:3475315-3479349	control	10	OK	97.5512	60.8192	-0.681632	-2.23186	0.0259	0.545278	no
serpinb14	NC_007127.6:51377959-51390717	control	10	OK	27.0922	44.0063	0.699831	2.09181	0.0324	0.608732	no
serpine1	NC_007118.6:25994394-25998816	control	10	OK	5.3007	14.3088	1.43265	4.16547	5e-05	0.00654421	yes
serpinf1	NC_007132.6:40082912-40096616	control	10	OK	2.52006	4.5613	0.855988	2.5469	0.0095	0.318286	yes
serpinh1b	NC_007126.6:29426867-29454581	control	10	OK	149.374	65.2428	-1.19504	-3.58495	5e-05	0.00654421	yes
sesn2	NC_007130.6:43745583-43761860	control	10	OK	4.10402	11.1622	1.44352	4.08017	5e-05	0.00654421	yes
sfrp2	NC_007112.6:24798546-24805304	control	10	OK	39.6579	18.2102	-1.12286	-3.63966	0.00035	0.0331638	yes
sfrp5	NC_007124.6:39785660-39821445	control	10	OK	8.83027	5.05842	-0.803771	-2.31846	0.02335	0.517908	no
sgk1	NC_007134.6:31713707-31766795	control	10	OK	16.6204	25.2928	0.60577	1.94897	0.04765	0.719094	no
sh2b3	NC_007116.6:9050684-9162746	control	10	OK	1.46647	2.6887	0.874567	2.13801	0.03355	0.618229	no
sh3bgr	NC_007126.6:5935971-5982873	control	10	OK	82.7616	47.6777	-0.795647	-1.95881	0.04675	0.713042	no
sh3pxd2ab	NC_007128.6:20500621-20538988	control	10	OK	3.65738	2.19403	-0.737228	-2.16453	0.026	0.546562	no
shisa2	NC_007116.6:21563769-21566429	control	10	OK	3.80814	1.79956	-1.08144	-2.15909	0.03985	0.671257	no
si:busm1-234g15.3	NC_007128.6:28743622-28753997	control	10	OK	0.672897	0.166738	-2.0128	-2.36022	0.0118	0.357229	no
si:ch1073-174d20.2	NC_007136.6:36571692-36589609	control	10	OK	8.57669	15.6666	0.869196	2.78045	0.00445	0.19463	no
si:ch1073-385f13.3	NC_007136.6:455806-461134	control	10	OK	0.917038	1.80448	0.976529	2.07356	0.03825	0.657432	no
si:ch1073-459j12.1	NC_007119.6:44765648-44806787	control	10	OK	14.0821	7.13361	-0.981157	-3.1283	0.0026	0.138133	no
si:ch211-105j21.7	NC_007117.6:48978666-49050384	control	10	OK	3.1501	1.3868	-1.18363	-2.44011	0.01605	0.427489	no
si:ch211-106h4.12	NC_007113.6:31682612-31685893	control	10	OK	3.2689	1.24305	-1.39492	-2.25861	0.02335	0.517908	no
si:ch211-107o23.1	NC_007129.6:27095418-27104960	control	10	OK	2.54734	5.79323	1.18538	3.12375	0.0022	0.123537	no
si:ch211-113a14.26	NC_007136.6:35817367-35817823	control	10	OK	0	0.694071	inf	#NAME?	0.00985	0.325496	no
si:ch211-117m20.5	NC_007116.6:30014378-30015598	control	10	OK	346.062	611.736	0.821879	2.4829	0.01495	0.411172	no
si:ch211-119o8.7	NC_007113.6:39055621-39062430	control	10	OK	1.4435	0	#NAME?	#NAME?	0.00045	0.0399878	yes
si:ch211-120m16.6	NC_007114.6:61057146-61104236	control	10	OK	2.06889	1.12978	-0.872816	-2.37632	0.01725	0.44408	no
si:ch211-12d10.5	NC_007124.6:32866563-32891934	control	10	OK	4.02656	2.34272	-0.781363	-2.11191	0.0326	0.609872	no
si:ch211-133j6.3	NC_007134.6:10417950-10421158	control	10	OK	0.925125	0.231048	-2.00145	-2.90025	0.01535	0.416448	no
si:ch211-134a4.1	NC_007132.6:5365573-5375074	control	10	OK	3.00475	0.433121	-2.7944	-3.96456	0.005	0.211678	no
si:ch211-137i24.12	NC_007116.6:23760704-23767350	control	10	OK	0.773127	0.05373	-3.84691	-2.44849	0.02035	0.485509	no
si:ch211-142k18.1	NC_007131.6:19879786-19892371	control	10	OK	17.196	9.3306	-0.882032	-2.03874	0.0329	0.612376	no
si:ch211-156j16.1	NC_007119.6:26694174-26846933	control	10	OK	56.3366	32.915	-0.775328	-1.96653	0.0486	0.726076	no
si:ch211-157c3.4	NC_007114.6:27511538-27532313	control	10	OK	36.7607	64.7091	0.815805	2.63852	0.0071	0.267148	no
si:ch211-158d24.4	NC_007119.6:41639777-41643876	control	10	OK	2.54966	4.63326	0.861722	2.02604	0.0382	0.657432	no
si:ch211-160j14.2	NC_007132.6:32018823-32027748	control	10	OK	2.04144	5.15593	1.33665	2.56248	0.01815	0.456016	no
si:ch211-161h7.8	NC_007135.6:20815793-20821194	control	10	OK	2.27217	4.59567	1.0162	2.59863	0.0098	0.32461	no
si:ch211-173a9.7	NC_007128.6:52503659-52509667	control	10	OK	1.30223	4.30311	1.72439	3.6319	0.0021	0.119067	no
si:ch211-180a12.2	NC_007123.6:3962133-3991328	control	10	OK	0.842891	0.261136	-1.69054	-2.77801	0.01285	0.377907	no
si:ch211-199o1.2	NC_007119.6:24948450-24951954	control	10	OK	1.51274	3.23573	1.09693	2.5282	0.01255	0.372053	no
si:ch211-202h22.7	NC_007112.6:53972319-53982327	control	10	OK	0.139472	6.55773	5.55515	3.84955	0.0223	0.507479	no
si:ch211-202h22.8	NC_007112.6:53961141-53971115	control	10	OK	1.07165	2.45221	1.19425	2.35821	0.0263	0.549733	no
si:ch211-209j10.6	NC_007134.6:18978330-18986816	control	10	OK	1.57066	4.47397	1.51018	3.09233	0.0028	0.145341	no
si:ch211-213d14.2	NC_007126.6:17819182-17821011	control	10	OK	17.7195	5.53011	-1.67996	-4.19924	0.00015	0.0170511	yes
si:ch211-216l23.2	NC_007129.6:17765408-17786844	control	10	OK	19.4905	9.72434	-1.0031	-3.16862	0.0017	0.104146	no
si:ch211-217k17.9	NC_007112.6:51757609-51765929	control	10	OK	8.33253	14.4577	0.795009	2.58155	0.0095	0.318286	no
si:ch211-222g5.3	NC_007134.6:19638050-19657471	control	10	OK	7.39604	4.51785	-0.711118	-2.06224	0.03795	0.655332	no
si:ch211-224b1.4	NC_007113.6:44928211-45070996	control	10	OK	2.65155	1.19056	-1.1552	-2.00254	0.0376	0.652345	no
si:ch211-225b11.1	NC_007116.6:20282970-20310917	control	10	OK	2.40573	12.7694	2.40814	7.08499	5e-05	0.00654421	yes
si:ch211-232m10.6	NC_007130.6:10437428-10454859	control	10	OK	0.908215	0.180543	-2.33069	-2.25189	0.01545	0.418028	no
si:ch211-233a24.2	NC_007124.6:12651798-12853459	control	10	OK	4.69431	7.27173	0.631384	1.98783	0.04555	0.708002	no
si:ch211-234p6.5	NC_007135.6:38249491-38304106	control	10	OK	1.86056	0.749639	-1.31147	-2.79323	0.0061	0.241459	no
si:ch211-23l10.2	NC_007114.6:16296741-16310315	control	10	OK	2.37443	1.13341	-1.06692	-2.56039	0.0109	0.339223	no
si:ch211-250g4.3	NC_007130.6:37922500-37980379	control	10	OK	0.36044	0.969342	1.42725	4.39745	5e-05	0.00654421	yes
si:ch211-255g12.6	NC_007119.6:6911416-6914625	control	10	OK	115.861	7.95811	-3.86382	-9.68091	5e-05	0.00654421	yes
si:ch211-273d2.3	NC_007113.6:50327726-50367553	control	10	OK	5.02779	7.7187	0.618434	1.9592	0.04415	0.701336	no
si:ch211-276c2.2	NC_007126.6:41598209-41706897	control	10	OK	0.85713	0.408657	-1.06862	-1.91015	0.03965	0.669338	no
si:ch211-29n12.1	NC_007116.6:8741800-8773753	control	10	OK	0.501192	1.44013	1.52276	2.62121	0.01065	0.333965	no
si:ch211-71m22.1	NC_007113.6:8788942-8842461	control	10	OK	3.58152	1.76013	-1.02489	-2.22406	0.02655	0.552813	no
si:ch211-93g23.2	NC_007112.6:5907572-5948369	control	10	OK	0.281935	1.40025	2.31226	1.96967	0.0414	0.684199	no
si:ch73-103b2.3	NC_007127.6:26143923-26145240	control	10	OK	1.99145	0.50291	-1.98544	-2.61826	0.03135	0.599623	no
si:ch73-111m19.2	NC_007123.6:45515706-45527077	control	10	OK	7.26006	1.08818	-2.73806	-4.35133	0.00025	0.0256683	yes
si:ch73-141c7.1	NC_007114.6:17874239-17881055	control	10	OK	12.3936	6.83938	-0.857659	-2.33931	0.01975	0.478035	no
si:ch73-185c24.2	NC_007117.6:34043832-34052046	control	10	OK	1.86727	0.659785	-1.50086	-2.65458	0.0156	0.419976	no
si:ch73-240m14.4	NC_007128.6:50114787-50141173	control	10	OK	2.05586	3.88844	0.919452	1.99206	0.04185	0.688549	no
si:ch73-334d15.1	NC_007135.6:36832887-36840304	control	10	OK	6.83766	4.03018	-0.762659	-2.14606	0.02685	0.556083	no
si:ch73-34j14.3	NC_007128.6:26551085-26568458	control	10	OK	5.90268	3.43016	-0.783096	-2.1949	0.02565	0.543118	no
si:ch73-63e15.2	NC_007133.6:17667250-17756247	control	10	OK	1.97121	4.29406	1.12326	3.44415	0.00055	0.0465129	yes
si:ch73-64e16.2	NC_007126.6:1125889-1142731	control	10	OK	0.616754	0.321663	-0.939146	-2.0302	0.0464	0.711578	no
si:ch73-70c5.1	NC_007135.6:38770545-38807189	control	10	OK	2.8022	4.95988	0.823746	2.13171	0.0323	0.608322	no
si:dkey-104n9.1	NC_007119.6:12805149-12809775	control	10	OK	0.174714	2.43697	3.80202	4.18467	0.0443	0.701336	no
si:dkey-126g1.9	NC_007134.6:32007024-32014398	control	10	OK	14.2985	23.6559	0.726334	2.21855	0.02745	0.56252	no
si:dkey-150i13.2	NC_007134.6:13157303-13180739	control	10	OK	1.34445	2.93817	1.1279	2.13791	0.02925	0.578416	no
si:dkey-162h11.3	NC_007118.6:836778-844168	control	10	OK	0.1583	0.623664	1.97811	2.7637	0.01105	0.341764	no
si:dkey-165i4.3	NC_007116.6:40979095-41039212	control	10	OK	2.92516	5.57751	0.931106	2.94896	0.00365	0.171648	no
si:dkey-175a17.3	NC_007126.6:26667738-26678098	control	10	OK	0.263234	0.766988	1.54286	2.24523	0.03965	0.669337	no
si:dkey-175a17.4	NC_007126.6:26682416-26703995	control	10	OK	0.9548	0.256686	-1.89519	-3.08772	0.0025	0.13435	no
si:dkey-17e16.17	NC_007132.6:25651702-25658738	control	10	OK	22.1132	13.2313	-0.740949	-2.36509	0.0187	0.464502	no
si:dkey-1d7.3	NC_007132.6:18369491-18410639	control	10	OK	1.40793	0.607054	-1.21367	-2.77682	0.00745	0.274998	no
si:dkey-202l22.6	NC_007126.6:12073360-12079784	control	10	OK	34.9709	8.86048	-1.9807	-6.33359	5e-05	0.00654421	yes
si:dkey-204l11.1	NC_007116.6:34923256-34940821	control	10	OK	0.384901	2.14562	2.47883	4.71614	5e-05	0.00654421	yes
si:dkey-205h13.2	NC_007134.6:26599167-26609338	control	10	OK	26.3218	15.7425	-0.741592	-2.40223	0.0189	0.466491	no
si:dkey-206p8.1	NC_007128.6:46403759-46465475	control	10	OK	2.59539	1.5062	-0.785043	-1.98199	0.0422	0.691383	no
si:dkey-208k22.3	NC_007113.6:24709807-24713436	control	10	OK	0.876	0.201466	-2.1204	-3.09231	0.0137	0.393001	no
si:dkey-220f10.4	NC_007123.6:20496463-20504042	control	10	OK	3.29866	0.933347	-1.82139	-3.65769	0.0014	0.0910234	no
si:dkey-222b8.1	NC_007130.6:24340561-24394090	control	10	OK	4.55518	8.71098	0.935329	2.59394	0.00645	0.250498	no
si:dkey-22f5.10	NC_007132.6:30561945-30611402	control	10	OK	1.41546	0.279385	-2.34094	-4.07738	0.0001	0.0119493	yes
si:dkey-22f5.9	NC_007132.6:30614367-30621846	control	10	OK	0.714422	0.273265	-1.38647	-2.16256	0.04495	0.705093	no
si:dkey-22i16.3	NC_007112.6:43200801-43204099	control	10	OK	16.3819	5.44078	-1.59022	-4.31366	5e-05	0.00654421	yes
si:dkey-22i16.7	NC_007112.6:43244433-43247666	control	10	OK	0	0.627041	inf	#NAME?	0.00275	0.14349	no
si:dkey-250l23.4	NC_007119.6:31913462-31929241	control	10	OK	1.79658	0.546607	-1.71667	-2.93439	0.0073	0.271753	no
si:dkey-25e12.3	NC_007131.6:26644598-26652120	control	10	OK	1.63395	3.87003	1.24398	2.75668	0.00755	0.277957	no
si:dkey-261j4.3	NC_007116.6:60945974-60953404	control	10	OK	0.688228	1.51157	1.13509	2.0572	0.0488	0.726864	no
si:dkey-264b2.3	NC_007123.6:38345568-38352968	control	10	OK	1.57051	3.43996	1.13116	3.34596	0.00095	0.0695108	no
si:dkey-265g24.3	NC_007128.6:27951843-27959044	control	10	OK	0.374294	1.64161	2.13286	3.76038	0.00085	0.0639308	no
si:dkey-265k11.2,si:dkey-27f16.4	NC_007112.6:39559032-39611370	control	10	OK	0.447114	1.14607	1.35798	2.46654	0.01265	0.372965	no
si:dkey-269d20.3	NC_007127.6:11943673-11948557	control	10	OK	2.37198	6.16289	1.37751	3.07745	0.0035	0.167863	no
si:dkey-269i1.3	NC_007123.6:16637097-16642871	control	10	OK	0.918284	8.25971	3.16908	6.16177	5e-05	0.00654421	yes
si:dkey-27p18.3	NC_007116.6:21902796-21922853	control	10	OK	0.230743	0.679244	1.55765	2.01361	0.03375	0.620934	no
si:dkey-283b15.2	NC_007127.6:5748357-5772266	control	10	OK	6.27139	3.50695	-0.838568	-2.35185	0.0143	0.402787	no
si:dkey-31b16.14,sult1st5	NC_007134.6:24556994-24567275	control	10	OK	4.61285	10.9359	1.24534	3.07802	0.00185	0.109875	no
si:dkey-3h2.3	NC_007128.6:50217196-50231931	control	10	OK	1.30299	2.7047	1.05364	2.35748	0.01655	0.434689	no
si:dkey-42p14.3	NC_007136.6:26452087-26456608	control	10	OK	1.77099	0.813405	-1.12251	-2.04875	0.04085	0.679948	no
si:dkey-44g23.5	NC_007133.6:26959868-26971705	control	10	OK	15.2913	24.3456	0.670949	2.11041	0.03615	0.640433	no
si:dkey-4p15.3	NC_007126.6:19725760-19741779	control	10	OK	0.894041	13.5082	3.91736	9.19789	5e-05	0.00654421	yes
si:dkey-57a22.15	NC_007120.6:22193072-22193964	control	10	OK	24.3435	7.30023	-1.73752	-4.35215	0.0004	0.0363284	yes
si:dkey-5g14.1	NC_007121.6:26540404-26551094	control	10	OK	7.85243	3.78396	-1.05324	-2.77081	0.00465	0.200992	no
si:dkey-65j6.2	NC_007134.6:43284613-43359601	control	10	OK	4.60375	2.59666	-0.826154	-2.50922	0.01165	0.354836	no
si:dkey-76p7.5	NC_007121.6:17634187-17719232	control	10	OK	1.15183	0.520651	-1.14554	-2.38161	0.0161	0.428007	no
si:dkey-77d17.6	NC_007127.6:44939822-44979398	control	10	OK	0.882808	0.344729	-1.35664	-2.67363	0.01085	0.338117	no
si:dkey-7c18.24	NC_007131.6:46136860-46139685	control	10	OK	0.166257	1.26505	2.92771	2.55842	0.0145	0.406296	no
si:dkey-7j14.6	NC_007127.6:43124317-43137692	control	10	OK	21.2124	34.2326	0.690462	2.22529	0.02745	0.56252	no
si:dkey-85n7.6	NC_007131.6:27340471-27384735	control	10	OK	2.31046	1.28106	-0.850844	-2.26362	0.02585	0.545045	no
si:dkey-8e10.3	NC_007119.6:9993352-10009474	control	10	OK	2.07271	0.701405	-1.5632	-2.70358	0.0119	0.359015	no
si:dkey-8k3.2	NC_007127.6:16757225-16793809	control	10	OK	6.0877	10.7134	0.815452	2.65563	0.00875	0.304675	no
si:dkey-91f15.1	NC_007117.6:18993491-19005257	control	10	OK	1.14513	0.157412	-2.86289	-3.37145	0.00385	0.177361	no
si:dkey-92i17.2	NC_007125.6:10301431-10312024	control	10	OK	4.40486	7.26464	0.721796	1.93691	0.0463	0.711578	no
si:dkey-9l20.3	NC_007134.6:3595556-3698536	control	10	OK	0.456638	0.708281	0.633272	1.97075	0.0444	0.701336	no
si:dkeyp-118b3.3	NC_007126.6:20607837-20713576	control	10	OK	1.84489	2.97095	0.687389	2.03716	0.0348	0.629827	no
si:dkeyp-12a9.5	NC_007113.6:48328437-48344002	control	10	OK	11.235	4.50209	-1.31934	-3.25909	0.0011	0.0774124	no
si:dkeyp-23e4.3	NC_007132.6:35346682-35499897	control	10	OK	0.620125	0.26405	-1.23175	-2.28807	0.0301	0.586284	no
si:dkeyp-27c8.2	NC_007134.6:40862859-40873614	control	10	OK	5.20677	10.2146	0.972176	2.32392	0.0231	0.516783	no
si:dkeyp-69e1.8	NC_007114.6:25933178-25941717	control	10	OK	5.38007	9.34974	0.7973	2.20082	0.02355	0.520202	no
si:dkeyp-89c11.1	NC_007115.6:25662502-25677365	control	10	OK	2.52031	1.1555	-1.12508	-2.21619	0.02805	0.567836	no
si:rp71-17i16.4	NC_007134.6:20481784-20495046	control	10	OK	3.13798	0.984359	-1.67258	-3.16024	0.0031	0.156504	no
si:rp71-56i13.6	NC_007121.6:29968872-30001537	control	10	OK	0.674161	0.29447	-1.19498	-1.96057	0.04185	0.688549	no
si:rp71-61h23.4	NC_007119.6:19240443-19250464	control	10	OK	6.58912	10.8197	0.715502	2.09678	0.0395	0.667933	no
sid4	NC_007112.6:57971070-57980853	control	10	OK	14.4321	23.6812	0.714468	2.27985	0.02295	0.514414	no
slc11a2	NC_007122.6:262380-268216	control	10	OK	18.8819	30.6351	0.698178	2.26768	0.0252	0.538968	no
slc11a2	NW_003334912.1:3858-6425	control	10	OK	33.2163	67.0809	1.01401	2.5327	0.014	0.397374	no
slc12a3	NC_007129.6:17594412-17609689	control	10	OK	0.579113	0.191915	-1.59338	-2.54014	0.0211	0.493977	no
slc12a7a	NC_007113.6:24374605-24413406	control	10	OK	2.80094	4.80075	0.777347	2.29062	0.0192	0.471238	no
slc12a8	NC_007120.6:38832726-38872452	control	10	OK	0.212848	0.567807	1.41557	1.89798	0.04085	0.679948	no
slc13a2	NC_007132.6:39055310-39073444	control	10	OK	13.1271	19.9448	0.603459	1.9588	0.0473	0.717194	no
slc16a9b	NC_007123.6:7555067-7572990	control	10	OK	8.08651	15.3699	0.92652	2.94486	0.0042	0.187442	no
slc17a7	NC_007114.6:16462773-16507661	control	10	OK	4.3765	2.21084	-0.985182	-2.55612	0.00785	0.285252	no
slc1a4	NC_007124.6:24300761-24317250	control	10	OK	21.7848	53.2733	1.29009	3.9898	5e-05	0.00654421	yes
slc1a5	NC_007126.6:11760619-11786666	control	10	OK	21.6339	38.408	0.828112	2.4669	0.0104	0.32848	no
slc1a8a	NC_007122.6:15010728-15032790	control	10	OK	2.00693	0.450028	-2.15691	-3.77202	0.00135	0.0893488	no
slc22a16	NC_007131.6:31384405-31402290	control	10	OK	8.79783	5.39619	-0.705207	-1.93547	0.0492	0.728363	no
slc22a31	NC_007118.6:56125478-56167356	control	10	OK	7.45856	13.7021	0.877432	2.81994	0.0057	0.230979	no
slc23a2	NC_007119.6:42910658-42983769	control	10	OK	1.15489	2.43493	1.07613	3.09524	0.0009	0.0667592	no
slc24a2	NC_007112.6:11322880-11354905	control	10	OK	1.42981	0.360827	-1.98645	-2.79588	0.01045	0.329761	no
slc25a10	NC_007114.6:48996193-49010736	control	10	OK	2.55562	1.03574	-1.30301	-2.66803	0.00745	0.274998	no
slc25a1b	NC_007121.6:3264755-3294893	control	10	OK	13.9592	23.9249	0.777296	2.2668	0.0212	0.494994	no
slc25a22	NC_007117.6:49096952-49160441	control	10	OK	133.104	77.6396	-0.777691	-2.05735	0.0347	0.629155	no
slc25a37	NC_007119.6:50202079-50238349	control	10	OK	1.05377	2.06584	0.971177	2.90325	0.00315	0.156879	no
slc25a38a	NC_007114.6:4733897-4753472	control	10	OK	0.728089	6.40624	3.13729	5.97795	0.00015	0.0170511	yes
slc25a3a	NC_007115.6:16855996-16864701	control	10	OK	2.82787	0.790921	-1.83811	-3.26724	0.0029	0.148441	no
slc25a4	NC_007112.6:16983824-16986150	control	10	OK	353.446	207.924	-0.765435	-2.22618	0.02645	0.551715	no
slc25a43	NC_007125.6:32544416-32567435	control	10	OK	4.989	8.71817	0.805275	2.27011	0.02235	0.507957	no
slc25a47a	NC_007131.6:53838368-53852425	control	10	OK	0.797499	3.49534	2.13188	4.60065	5e-05	0.00654421	yes
slc26a6	NC_007119.6:26248435-26269427	control	10	OK	0.651638	0.282567	-1.20548	-2.13056	0.04205	0.689894	no
slc27a2a	NC_007129.6:62992-81635	control	10	OK	50.9287	80.4455	0.659532	1.95676	0.0467	0.7129	no
slc29a2	NC_007132.6:27370794-27376575	control	10	OK	5.68878	9.11406	0.679975	2.01049	0.045	0.705403	no
slc2a14	NC_007127.6:12586792-12605914	control	10	OK	0.859288	1.67034	0.958929	1.98037	0.0486	0.726076	no
slc2a1a	NC_007134.6:22273915-22285975	control	10	OK	4.89684	1.87045	-1.38847	-3.21486	0.0025	0.13435	no
slc2a5	NC_007134.6:22689485-22706390	control	10	OK	1.56132	0.250474	-2.64004	-2.82403	0.00655	0.252979	no
slc35f4	NC_007128.6:44388263-44471166	control	10	OK	2.08008	1.0079	-1.04529	-2.088	0.0338	0.621365	no
slc37a4	NC_007121.6:39192825-39211371	control	10	OK	19.4964	11.6182	-0.746826	-2.35861	0.01605	0.427489	no
slc38a2	NC_007115.6:1750986-1768584	control	10	OK	19.062	30.8764	0.695802	2.23453	0.0261	0.547514	no
slc39a5	NC_007134.6:32409237-32425647	control	10	OK	8.24444	14.5077	0.815325	2.56813	0.00865	0.302245	no
slc39a8	NC_007124.6:11557113-11581834	control	10	OK	1.36358	2.87968	1.07851	2.4567	0.01405	0.398309	no
slc43a2b	NC_007121.6:24403391-24422641	control	10	OK	54.1574	118.033	1.12396	3.18047	0.0015	0.095747	no
slc4a1a	NC_007114.6:19916111-19944746	control	10	OK	32.4566	76.2928	1.23304	3.83284	0.00015	0.0170511	yes
slc4a5	NC_007121.6:44965202-45054831	control	10	OK	1.09301	0.559303	-0.966611	-2.23911	0.02075	0.489079	no
slc5a11	NC_007114.6:18505932-18525924	control	10	OK	1.31815	0.404207	-1.70535	-2.95865	0.0077	0.281261	no
slc5a9	NC_007119.6:15216841-15231227	control	10	OK	2.30539	0.959537	-1.2646	-2.58586	0.01115	0.343039	no
slc6a15	NC_007129.6:16158203-16192911	control	10	OK	8.26685	15.0463	0.863997	2.49274	0.01185	0.358278	no
slc6a4a	NC_007126.6:28673151-28701635	control	10	OK	8.23263	3.88144	-1.08476	-3.05656	0.0014	0.0910234	no
slc6a8	NC_007119.6:9013130-9081128	control	10	OK	8.9344	5.84096	-0.613163	-1.94113	0.0482	0.723341	no
slc7a11	NC_007125.6:41519638-41552573	control	10	OK	0.202023	0.784971	1.95812	2.64303	0.0318	0.604105	no
slc7a3a	NC_007132.6:30465277-30508386	control	10	OK	9.61959	24.8767	1.37075	3.78493	0.0001	0.0119493	yes
slc7a6	NC_007118.6:28352120-28376812	control	10	OK	5.13561	8.12949	0.662629	1.90186	0.04555	0.708002	no
slc8a2a	NC_007116.6:36254602-36293202	control	10	OK	0.898162	0.269113	-1.73876	-2.76638	0.00095	0.0695108	no
slco2b1	NC_007132.6:40116961-40151123	control	10	OK	3.97618	1.74946	-1.18447	-3.01607	0.0042	0.187442	no
smc1a	NC_007134.6:28766740-28787441	control	10	OK	1.13177	0.319791	-1.82338	-3.40657	0.0037	0.172493	no
smco4	NC_007126.6:41280851-41288628	control	10	OK	19.6034	11.7251	-0.741498	-2.17355	0.0267	0.55396	no
smpd2a	NC_007134.6:5631676-5655532	control	10	OK	12.0404	7.21503	-0.7388	-2.22368	0.0239	0.525447	no
smyd1a	NC_007116.6:71323770-71341009	control	10	OK	169.871	98.6184	-0.784511	-2.43141	0.014	0.397374	no
smyd2b	NC_007131.6:582258-600165	control	10	OK	24.3084	12.1554	-0.99986	-3.02076	0.0021	0.119067	no
sned1	NC_007117.6:27461318-27519756	control	10	OK	2.44797	1.36296	-0.844847	-2.25647	0.02605	0.546956	no
snx10a	NC_007130.6:18655505-18664778	control	10	OK	0.777645	2.01615	1.37442	2.29913	0.02535	0.540689	no
snx11	NC_007123.6:20483316-20494221	control	10	OK	4.55532	7.19293	0.659026	2.08405	0.03825	0.657432	no
snx19a	NC_007116.6:29750620-29781640	control	10	OK	1.18868	0.516371	-1.20288	-2.38802	0.02165	0.499505	no
soat1	NC_007119.6:14848694-14875591	control	10	OK	0.969776	1.88378	0.957908	1.98375	0.038	0.655711	no
socs3b	NC_007123.6:34172282-34176402	control	10	OK	6.14822	9.67097	0.653493	1.95025	0.0494	0.728363	no
sost	NC_007123.6:27239967-27244296	control	10	OK	7.93579	4.22552	-0.909245	-2.60969	0.0115	0.351798	no
sparcl1	NC_007112.6:36693514-36720180	control	10	OK	8.02254	4.59087	-0.805292	-2.25948	0.02685	0.556083	no
spg20b	NC_007126.6:32940407-32960008	control	10	OK	4.58225	8.39379	0.873268	2.50106	0.0099	0.325992	no
spint1a	NC_007128.6:1922246-1931253	control	10	OK	35.5491	55.5509	0.643997	2.09193	0.0351	0.632315	no
spon2a	NC_007125.6:21563853-21604564	control	10	OK	2.43804	0.83638	-1.54349	-3.74544	0.00055	0.0465129	yes
spon2b	NC_007125.6:17071314-17076605	control	10	OK	7.40165	3.94098	-0.909294	-2.27841	0.0253	0.540116	no
sqrdl	NC_007136.6:32062263-32084409	control	10	OK	14.5417	36.4561	1.32597	4.19336	5e-05	0.00654421	yes
sqstm1	NC_007125.6:16460343-16469529	control	10	OK	24.6514	145.15	2.5578	7.88259	5e-05	0.00654421	yes
srcap	NC_007123.6:26970360-27000931	control	10	OK	7.38561	11.4622	0.634097	2.03114	0.0372	0.648297	no
srebf1	NC_007114.6:61821958-61850747	control	10	OK	7.75496	17.6517	1.18662	3.7131	0.00045	0.0399878	yes
srsf1b	NC_007132.6:39523832-39532686	control	10	OK	36.0272	20.6401	-0.803637	-2.56411	0.00885	0.306026	no
sspn	NC_007129.6:16121729-16134270	control	10	OK	12.9109	7.49573	-0.784451	-2.18041	0.03245	0.608977	no
sst2	NC_007113.6:5814470-5816962	control	10	OK	10.7009	38.0999	1.83206	4.66525	5e-05	0.00654421	yes
st6galnac2	NW_003334263.2:26443-61429	control	10	OK	1.9548	0.820684	-1.25212	-2.09955	0.03085	0.59379	no
stab2	NC_007115.6:10719828-10764756	control	10	OK	1.48894	0.556482	-1.41988	-3.62088	0.0007	0.0554481	no
stac3	NC_007120.6:308235-321020	control	10	OK	36.7622	23.4757	-0.647055	-1.96405	0.0473	0.717194	no
stard10	NC_007125.6:32930072-32937765	control	10	OK	12.9736	21.9138	0.75626	2.41031	0.0167	0.437153	no
stat3	NC_007114.6:16880860-16960204	control	10	OK	17.196	9.3306	-0.882032	-2.03874	0.0329	0.612376	no
stbd1	NC_007132.6:5483014-5496529	control	10	OK	6.83791	4.09703	-0.738977	-2.09499	0.0325	0.608977	no
stc1l	NC_007121.6:42849624-42856582	control	10	OK	3.0959	0.0436271	-6.14899	-4.04021	0.0203	0.485142	no
steap3	NC_007120.6:891034-900639	control	10	OK	1.79936	3.58193	0.993254	2.22499	0.02205	0.504248	no
steap4	NC_007127.6:27800236-27814572	control	10	OK	2.13287	1.15861	-0.880395	-2.17802	0.0343	0.625629	no
stk35	NC_007134.6:41839884-41867519	control	10	OK	3.64874	6.47037	0.826449	2.12492	0.02755	0.56263	no
stmn4l	NC_007128.6:12544449-12555259	control	10	OK	19.5024	12.0669	-0.692603	-2.07199	0.0352	0.632814	no
sts	NC_007112.6:31318851-31345192	control	10	OK	0.795752	0.284645	-1.48315	-2.35057	0.03365	0.619583	no
sult1st6	NC_007123.6:15159553-15166803	control	10	OK	2.75101	0.574479	-2.25964	-3.83396	0.0013	0.0873607	no
sult6b1	NC_007122.6:43083166-43095486	control	10	OK	33.036	75.4629	1.19173	3.88879	0.0001	0.0119493	yes
sv2ba	NC_007118.6:15017817-15057701	control	10	OK	4.06946	1.63569	-1.31494	-3.60287	0.0004	0.0363284	yes
sv2c	NC_007116.6:45376085-45471377	control	10	OK	2.32981	1.42899	-0.705221	-1.99352	0.0423	0.691727	no
syne1b	NC_007128.6:7687730-8016247	control	10	OK	1.0029	1.52371	0.603416	1.93089	0.0454	0.707555	no
synpo2b	NC_007112.6:25267788-25272454	control	10	OK	8.96987	2.93694	-1.61077	-4.70694	5e-05	0.00654421	yes
synpo2la	NC_007124.6:22119466-22133031	control	10	OK	13.6723	6.08624	-1.16763	-3.7443	5e-05	0.00654421	yes
taf4	NC_007122.6:20786784-20828096	control	10	OK	3.39528	2.04872	-0.728804	-2.02631	0.03985	0.671257	no
tagln	NC_007126.6:582940-590374	control	10	OK	7.85512	1.56421	-2.32819	-4.24871	0.00115	0.0798874	no
taldo1	NC_007129.6:50836101-50840362	control	10	OK	118.038	243.111	1.04236	3.32295	0.0012	0.0822993	no
tars	NC_007116.6:43746538-43771024	control	10	OK	37.0416	62.7057	0.75945	2.37441	0.01675	0.437644	no
tbata	NC_007123.6:47933071-47954875	control	10	OK	0.944851	2.1857	1.20994	1.86246	0.04255	0.693063	no
tbc1d17	NC_007114.6:30036104-30055492	control	10	OK	10.3443	16.9885	0.715714	2.24814	0.0225	0.510041	no
tbc1d2	NC_007125.6:5980991-6022830	control	10	OK	0.934775	1.80083	0.94597	2.2009	0.02775	0.564374	no
tcap	NC_007114.6:21110045-21112123	control	10	OK	4.43915	14.1563	1.67309	4.51689	5e-05	0.00654421	yes
tcnl	NC_007116.6:30017873-30020447	control	10	OK	4.95659	1.85421	-1.41855	-2.21647	0.0388	0.662657	no
tcte1	NC_007131.6:51530053-51542380	control	10	OK	0.262567	0.86281	1.71636	2.45128	0.01345	0.388535	no
tdh2	NC_007128.6:25395715-25406927	control	10	OK	10.1188	3.35503	-1.59265	-4.55767	5e-05	0.00654421	yes
tecrl2	NC_007113.6:15631531-15656127	control	10	OK	2.06394	0.741661	-1.47657	-2.50291	0.01965	0.477264	no
tefa	NC_007123.6:19022958-19031361	control	10	OK	36.6892	72.2619	0.977881	3.09522	0.00175	0.106095	no
tek	NC_007116.6:473661-497867	control	10	OK	1.10231	0.542232	-1.02354	-2.01403	0.03455	0.628225	no
tfe3a	NC_007119.6:7739968-7778978	control	10	OK	3.04303	9.79302	1.68625	4.02811	0.0001	0.0119493	yes
tfr1a	NC_007113.6:5006593-5034277	control	10	OK	7.32609	15.7276	1.10218	3.39934	0.0004	0.0363284	yes
tfr2	NC_007134.6:45227517-45249650	control	10	OK	1.49893	5.03263	1.74738	2.93442	0.00475	0.203555	no
tgfbr1a	NC_007113.6:24197883-24275901	control	10	OK	1.51046	2.75997	0.869667	2.09468	0.035	0.631163	no
tgm1l1	NC_007113.6:52074780-52126700	control	10	OK	11.3539	6.92246	-0.713836	-2.24798	0.02195	0.502782	no
tgm2a	NC_007134.6:43362769-43379521	control	10	OK	15.6792	5.78898	-1.43747	-4.34662	0.00015	0.0170511	yes
thbs2	NC_007124.6:35509635-35551530	control	10	OK	15.2527	29.3161	0.942631	2.94154	0.00315	0.156879	yes
thbs4b	NC_007132.6:4964957-4998122	control	10	OK	71.2763	119.625	0.747022	2.2585	0.0276	0.56263	no
thop1	NC_007121.6:15450447-15489501	control	10	OK	8.0014	4.18322	-0.93564	-2.68194	0.00645	0.250498	no
tie1	NC_007117.6:33996943-34024147	control	10	OK	3.44829	2.1457	-0.68443	-1.97654	0.0435	0.699265	no
tifa	NC_007118.6:22517560-22519302	control	10	OK	15.7589	31.4601	0.997359	3.17139	0.00245	0.132068	no
timp2b	NC_007114.6:57562440-57595994	control	10	OK	5.17368	8.01799	0.63205	1.92617	0.04935	0.728363	no
tinagl1	NC_007130.6:42183994-42246668	control	10	OK	4.53444	8.98657	0.986844	2.94492	0.0027	0.141514	no
tktb	NC_007134.6:20187034-20199904	control	10	OK	71.2763	119.625	0.747022	2.2585	0.0276	0.56263	no
tmem106ba	NC_007126.6:34108759-34120735	control	10	OK	16.7384	25.8391	0.626393	2.03222	0.0426	0.693233	no
tmem86b	NC_007114.6:16612612-16620518	control	10	OK	2.06856	0.888884	-1.21856	-2.40049	0.01735	0.445671	no
tmem8a	NC_007112.6:9232264-9280654	control	10	OK	8.09622	13.082	0.692263	1.99613	0.0353	0.633311	no
tmod4	NC_007127.6:29716114-29749570	control	10	OK	107.141	69.0538	-0.633722	-2.02575	0.04335	0.698297	no
tmprss13a	NC_007126.6:12394603-12428998	control	10	OK	2.42428	5.43873	1.16571	2.92803	0.0054	0.221774	no
tmprss4a	NC_007126.6:12504485-12527918	control	10	OK	6.80627	10.4714	0.621524	1.96337	0.0467	0.7129	no
tnfb	NC_007126.6:34841623-34844677	control	10	OK	0.243085	0.992945	2.03025	2.43483	0.04015	0.673718	no
tnfrsf1a	NC_007127.6:17154113-17164463	control	10	OK	8.67911	13.5641	0.644177	2.05328	0.041	0.68048	no
tnfsf12	NC_007118.6:20405048-20413368	control	10	OK	2.73664	1.21286	-1.174	-2.55435	0.01495	0.411172	no
tnmd	NC_007125.6:40274292-40355427	control	10	OK	5.07335	2.33232	-1.12117	-3.18763	0.0011	0.0774124	no
tnni1d	NC_007115.6:26368163-26372312	control	10	OK	6.94316	2.7106	-1.35698	-3.11495	0.00255	0.136304	no
tnni2a.1	NC_007136.6:30644592-30659073	control	10	OK	6.7067	3.00418	-1.15863	-2.41768	0.02265	0.51162	no
tnni2a.2	NC_007136.6:30661129-30671126	control	10	OK	5.60206	2.25605	-1.31216	-3.40389	0.00145	0.0933211	no
tnni2b.2	NC_007118.6:39114978-39121848	control	10	OK	201.593	128.692	-0.647529	-2.0739	0.03235	0.608609	no
tnnt3a	NC_007136.6:30827722-30840981	control	10	OK	768.001	403.365	-0.929022	-2.46038	0.01255	0.372053	no
tnr	NC_007113.6:35258233-35493311	control	10	OK	3.73083	1.99702	-0.90165	-2.1942	0.0275	0.562557	no
tnw	NC_007113.6:35526960-35584559	control	10	OK	137.754	82.6118	-0.737671	-2.07285	0.0327	0.610438	no
top1l	NC_007122.6:25058749-25074064	control	10	OK	61.6935	36.4582	-0.758874	-2.37478	0.0185	0.462322	no
toporsa	NC_007112.6:25410996-25416247	control	10	OK	1.857	3.1221	0.749545	2.03982	0.03765	0.652889	no
tp53	NC_007116.6:23582426-23594007	control	10	OK	9.4407	5.14764	-0.874983	-2.66673	0.00795	0.287246	no
tpm4b	NC_007113.6:55567557-55603032	control	10	OK	13.0941	6.75687	-0.954492	-2.62001	0.0081	0.291313	no
tpmt.1,tpmt.2	NC_007130.6:47698682-47718135	control	10	OK	7.21852	40.8603	2.50093	6.93055	5e-05	0.00654421	yes
trib3	NC_007122.6:23820672-23825339	control	10	OK	17.3462	36.6569	1.07946	3.52286	0.0003	0.0297548	yes
trim55a	NC_007113.6:42264891-42279242	control	10	OK	11.1163	6.91058	-0.685798	-2.00708	0.0457	0.708289	no
trpc6a	NC_007132.6:22764145-22776527	control	10	OK	0.623124	0.231594	-1.42792	-2.43814	0.0245	0.531299	no
trpm2	NC_007120.6:53297252-53390255	control	10	OK	0.886426	0.328588	-1.43172	-3.17101	0.00265	0.13973	no
trpv6	NC_007127.6:12390129-12428921	control	10	OK	4.67015	7.85941	0.750953	2.10165	0.031	0.595532	no
tspan36	NC_007119.6:29717387-29725716	control	10	OK	54.9026	110.817	1.01324	3.26334	0.0015	0.095747	no
tspo	NC_007117.6:40580682-40585711	control	10	OK	26.839	50.8896	0.92304	2.95191	0.0034	0.164874	no
ttc14	NC_007133.6:37653612-37676882	control	10	OK	10.0802	6.35922	-0.664598	-1.9779	0.04355	0.699427	no
ttna	NC_007120.6:43093057-43272165	control	10	OK	3.92316	1.96093	-1.00048	-2.45065	0.0099	0.325992	no
ttnb	NC_007120.6:42931205-43072068	control	10	OK	1.92697	1.04964	-0.876433	-2.77404	0.0052	0.21648	no
tubb1	NC_007117.6:49883066-49892748	control	10	OK	3.95113	8.25441	1.0629	2.78933	0.00415	0.186041	no
twf2	NC_007117.6:41466188-41504222	control	10	OK	11.7948	7.24013	-0.704062	-2.00135	0.0401	0.673201	no
txn	NC_007118.6:24086073-24093347	control	10	OK	65.2559	190.253	1.54374	5.01619	5e-05	0.00654421	yes
txnrd1	NC_007117.6:661721-688088	control	10	OK	32.8761	50.7287	0.62576	2.0391	0.03585	0.637865	no
ubash3ba	NC_007116.6:29250847-29300949	control	10	OK	2.52006	4.5613	0.855988	2.5469	0.0095	0.318286	no
ubr4	NC_007134.6:21352358-21451032	control	10	OK	5.55597	9.26664	0.738007	2.34057	0.01775	0.450983	no
uchl1	NC_007112.6:21957016-21961285	control	10	OK	18.3581	39.933	1.12116	3.53114	0.00065	0.0528629	no
uck1	NC_007132.6:4061273-4080086	control	10	OK	3.72618	6.79785	0.867382	1.89852	0.0467	0.7129	no
ucmaa	NC_007115.6:7833005-7841860	control	10	OK	1.89536	0.123479	-3.94014	-2.51515	0.0203	0.485142	no
ucp2	NC_007121.6:36718911-36729619	control	10	OK	188.897	99.2322	-0.928721	-2.40735	0.015	0.412062	yes
uevld	NC_007136.6:24083515-24105107	control	10	OK	4.42393	7.8863	0.834019	2.36879	0.0163	0.431359	no
ugp2a	NC_007112.6:50348987-50374752	control	10	OK	30.4011	14.9071	-1.02813	-3.12553	0.00135	0.0893488	no
urah	NC_007129.6:31038030-31045193	control	10	OK	54.9732	89.0789	0.696356	2.25516	0.02165	0.499505	no
usf2	NC_007127.6:50025091-50056204	control	10	OK	1.56856	0.614298	-1.35243	-2.06095	0.04135	0.683696	no
ush1c	NC_007136.6:22546376-22607032	control	10	OK	1.25791	3.39774	1.43355	2.63544	0.00465	0.200992	no
usp18	NC_007115.6:5833795-5839371	control	10	OK	0.0972736	0.579156	2.57383	1.85089	0.01975	0.478035	no
usp28	NC_007132.6:23014308-23094995	control	10	OK	8.42669	5.19225	-0.698607	-2.19992	0.0254	0.541097	no
vamp8	NC_007116.6:27671258-27679211	control	15	OK	37.5864	23.0772	-0.703742	-2.19137	0.0294	0.579582
vcla	NC_007124.6:25079888-25153937	control	10	OK	7.99387	4.78014	-0.741842	-2.32101	0.01815	0.456016	no
vdra	NC_007134.6:45976218-45981381	control	10	OK	2.6619	5.45917	1.03622	2.30272	0.0178	0.451598	no
vdrb	NC_007117.6:38951726-39009201	control	10	OK	4.08362	6.82868	0.741758	2.29464	0.01625	0.430198	no
vegfaa	NC_007127.6:4458264-4506474	control	10	OK	5.15558	11.0938	1.10554	2.17322	0.011	0.341273	no
vil1	NC_007120.6:45109815-45152481	control	10	OK	3.47629	1.50192	-1.21074	-3.1031	0.00345	0.166034	no
viml	NC_007113.6:50657100-50675533	control	10	OK	1.03012	0.367028	-1.48886	-2.21954	0.0419	0.688886	no
vox	NC_007124.6:50307019-50309245	control	10	OK	0.921148	3.71539	2.01201	3.31651	0.00585	0.235287	no
vps13d	NC_007134.6:21768880-21837404	control	10	OK	1.88493	3.20238	0.764632	2.46792	0.0127	0.374124	no
vps9d1	NC_007129.6:14665463-14699886	control	10	OK	4.4898	6.9802	0.636618	1.88973	0.0489	0.727116	no
vsg1	NC_007122.6:6046486-6051173	control	10	OK	19.2781	12.1693	-0.663722	-2.11654	0.0355	0.634868	no
vsig10	NC_007116.6:12062663-12086671	control	10	OK	5.11738	8.55519	0.741394	2.17711	0.029	0.577879	no
vtg7	NC_007133.6:24823602-24830421	control	10	OK	0.381065	0.912162	1.25925	2.47957	0.0212	0.494994	no
vwde	NC_007126.6:34131218-34136439	control	10	OK	47.3242	24.8222	-0.930949	-2.92779	0.00445	0.19463	no
wbscr17	NC_007126.6:16585811-16610905	control	10	OK	2.7656	1.52628	-0.857571	-2.11402	0.02915	0.578071	no
wdfy3	NC_007116.6:39448847-39598836	control	10	OK	3.36683	5.24362	0.63917	2.03688	0.0372	0.648297	no
wdr73	NC_007132.6:21783241-21787656	control	10	OK	4.8406	2.5522	-0.923446	-2.0982	0.034	0.623241	no
wdr76	NC_007118.6:29930460-29938640	control	10	OK	2.19171	5.6257	1.35997	3.32244	0.0019	0.11087	no
wfs1a	NC_007112.6:13625689-13653126	control	10	OK	5.07762	2.49414	-1.02561	-2.95308	0.00285	0.146955	no
wisp3	NC_007131.6:274359-296230	control	10	OK	5.73267	10.2787	0.842374	2.67724	0.007	0.264666	no
wnt4b	NC_007127.6:31846614-31857430	control	10	OK	6.11486	3.45602	-0.823207	-2.24723	0.02935	0.579086	no
wnt4b	NC_007127.6:31846614-31857430	control	10	OK	6.11486	3.45602	-0.823207	-2.24723	0.02935	0.579086	no
wu:fa03e10	NC_007112.6:55900562-55906050	control	10	OK	188.897	99.2322	-0.928721	-2.40735	0.015	0.412062	no
wu:fb15e04	NC_007132.6:25150475-25160498	control	10	OK	356.174	211.563	-0.751496	-2.02729	0.046	0.71058	no
wu:fb36g12	NC_007123.6:16620936-16624654	control	10	OK	0.37266	1.76665	2.24509	3.18783	0.01155	0.352711	no
wu:fc66h01	NC_007116.6:197827-248898	control	10	OK	6.36841	3.46545	-0.877891	-2.3707	0.0139	0.396464	no
wu:fd14a01,zgc:66156	NC_007133.6:235619-295686	control	10	OK	1.79088	0.863411	-1.05255	-2.67359	0.0075	0.276552	no
wu:fd44f11	NC_007118.6:20335580-20359087	control	10	OK	5.077	2.96448	-0.776197	-2.00273	0.0441	0.701336	no
wu:fi11a05	NC_007116.6:36904136-36910739	control	10	OK	2.85307	4.49914	0.657135	1.95692	0.0494	0.728363	no
wu:fi38e05	NC_007122.6:11217527-11277246	control	10	OK	97.3587	33.1231	-1.55547	-4.64117	5e-05	0.00654421	yes
wu:fi74c02	NC_007125.6:47233764-47240909	control	10	OK	14.6254	2.51275	-2.54114	-6.23976	5e-05	0.00654421	yes
wu:fj08f03	NC_007125.6:11144478-11150634	control	10	OK	5.15555	10.8347	1.07147	3.33669	0.00095	0.0695108	no
wu:fj19g03	NC_007112.6:53864616-53876221	control	10	OK	6.64158	2.76076	-1.26646	-3.22904	0.00225	0.124942	no
wu:fj58g06	NC_007121.6:20299014-20299795	control	10	OK	3.08445	8.61243	1.48141	3.12683	0.00435	0.191934	no
xrn1	NC_007113.6:16928191-16978688	control	10	OK	6.85578	10.2877	0.585531	1.90719	0.0491	0.727646	no
xylt2	NC_007114.6:59886672-59936686	control	10	OK	1.78025	4.08846	1.19948	3.16315	0.0013	0.0873607	no
zfand2a	NC_007114.6:42667824-42687238	control	10	OK	14.416	41.5146	1.52595	4.28692	0.0001	0.0119493	yes
zgc:100868	NC_007114.6:39331236-39346753	control	10	OK	18.8715	47.2321	1.32356	4.10956	5e-05	0.00654421	yes
zgc:101040	NC_007129.6:40489793-40493959	control	10	OK	5.2088	1.68939	-1.62444	-3.25914	0.00415	0.186041	no
zgc:101788	NC_007117.6:39100915-39107943	control	10	OK	1.04865	2.40235	1.19592	2.29382	0.02725	0.560225	no
zgc:109934	NC_007114.6:31986955-31988640	control	10	OK	16.2479	132.339	3.02592	9.24452	5e-05	0.00654421	yes
zgc:109965	NC_007132.6:12969716-12988308	control	10	OK	15.749	8.48351	-0.892525	-2.77562	0.00525	0.217527	no
zgc:110053	NC_007132.6:41850017-41860047	control	10	OK	12.4315	2.94864	-2.07587	-4.84314	5e-05	0.00654421	yes
zgc:110191	NC_007122.6:4129420-4165320	control	10	OK	6.84519	3.43701	-0.993937	-2.82125	0.00465	0.200992	no
zgc:110283	NC_007116.6:64309013-64315794	control	10	OK	21.6526	36.403	0.749516	2.197	0.02935	0.579086	no
zgc:110425	NC_007118.6:6333315-6334611	control	10	OK	0.408105	1.32276	1.69654	2.41368	0.03485	0.63008	no
zgc:110647	NC_007117.6:36843797-36859642	control	10	OK	8.29684	4.70392	-0.818697	-2.30182	0.02565	0.543118	no
zgc:112102	NC_007118.6:73891531-73892565	control	10	OK	0	1.51275	inf	#NAME?	0.01025	0.326244	no
zgc:112210	NC_007124.6:22709381-22713095	control	10	OK	5.19069	2.67101	-0.95854	-2.04211	0.0487	0.726864	no
zgc:112285	NC_007123.6:34945649-34953890	control	10	OK	6.15279	1.18949	-2.3709	-2.24295	0.0354	0.633806	no
zgc:112484	NC_007114.6:32093631-32158376	control	10	OK	4.19895	7.94229	0.919527	2.58949	0.00825	0.294589	no
zgc:113210	NC_007114.6:52392480-52406588	control	10	OK	6.97587	4.3033	-0.696931	-1.99956	0.0421	0.690391	no
zgc:113305	NC_007118.6:24557733-24567271	control	10	OK	3.05868	1.60165	-0.933347	-2.08309	0.04125	0.682364	no
zgc:113307	NC_007122.6:20889757-20900998	control	10	OK	6.29123	3.29525	-0.932955	-2.32759	0.02495	0.535748	no
zgc:113944	NC_007128.6:10592439-10610649	control	10	OK	7.29564	12.3491	0.7593	2.3859	0.01815	0.456016	no
zgc:114104	NC_007132.6:11428528-11436960	control	10	OK	3.33112	1.25958	-1.40307	-3.32554	0.00165	0.102065	no
zgc:114174	NC_007134.6:16904666-17022077	control	10	OK	1.28408	12.599	3.2945	7.84377	5e-05	0.00654421	yes
zgc:123218	NC_007128.6:33481054-33488542	control	10	OK	3.19457	6.51311	1.02772	2.17438	0.0338	0.621365	no
zgc:123284	NC_007114.6:44952363-44955045	control	10	OK	0	0.661963	inf	#NAME?	5e-05	0.00654421	yes
zgc:136220	NC_007118.6:33951282-33953859	control	10	OK	10.6896	0.706656	-3.91906	-5.76841	0.00105	0.0749482	no
zgc:136472	NC_007112.6:8550816-8565846	control	10	OK	1.12813	0.354635	-1.66953	-2.51592	0.02525	0.539707	no
zgc:136739	NC_007126.6:8193302-8215845	control	10	OK	2.56734	4.50479	0.811188	2.42952	0.01505	0.412626	no
zgc:136804	NC_007117.6:54051447-54071944	control	10	OK	0.972813	2.12947	1.13026	2.03775	0.0376	0.652345	no
zgc:136826	NW_003336241.2:382-8916	control	10	OK	68.6499	133.673	0.961377	3.07631	0.0021	0.119067	no
zgc:136859	NC_007125.6:9150660-9170276	control	10	OK	3.42693	6.93763	1.01753	2.77056	0.0062	0.244312	no
zgc:136872	NC_007128.6:3048812-3091582	control	10	OK	0.947424	0.411759	-1.20221	-2.04525	0.03855	0.66032	no
zgc:136906	NW_003337006.1:1609-2872	control	10	OK	5.91621	1.70541	-1.79455	-2.65302	0.02275	0.511897	no
zgc:136908	NC_007112.6:55109359-55132948	control	10	OK	7.17041	2.59477	-1.46645	-3.94629	5e-05	0.00654421	yes
zgc:136930	NC_007113.6:32796823-32809276	control	10	OK	332.54	197.745	-0.749886	-2.14143	0.03165	0.603384	no
zgc:153049	NC_007124.6:38688630-38986870	control	10	OK	4.62805	2.47785	-0.901314	-2.30575	0.0161	0.428007	no
zgc:153258	NC_007126.6:545339-555950	control	10	OK	3.09401	10.5296	1.7669	4.95414	5e-05	0.00654421	yes
zgc:153311	NC_007117.6:30496998-30500331	control	10	OK	1.15788	0.296355	-1.96609	-2.32337	0.04205	0.689894	no
zgc:153394	NC_007113.6:27747665-27754072	control	10	OK	2.07225	0.503802	-2.04027	-3.1458	0.00885	0.306026	no
zgc:153665	NC_007122.6:30383718-30388960	control	10	OK	42.1411	67.2768	0.674882	2.15614	0.02885	0.577025	no
zgc:153704	NC_007116.6:4041716-4052631	control	10	OK	14.2517	7.79378	-0.870737	-2.17591	0.032	0.606096	no
zgc:153788	NC_007122.6:413485-423601	control	10	OK	2.72909	5.36125	0.974151	2.27921	0.0112	0.344124	no
zgc:153911	NC_007124.6:35848529-35851129	control	10	OK	1.13314	2.33563	1.04349	2.07572	0.0462	0.711578	no
zgc:153921,zgc:172051,zgc:172253	NC_007114.6:1235686-1276667	control	10	OK	4.69943	2.69631	-0.801502	-2.04376	0.0295	0.580573	no
zgc:158263	NC_007134.6:26806688-26824512	control	10	OK	7.13698	11.6431	0.706095	2.20464	0.02815	0.568382	no
zgc:158340	NC_007122.6:44605014-44618837	control	10	OK	7.18147	3.31649	-1.11462	-3.07884	0.00315	0.156879	no
zgc:158387	NC_007124.6:45339356-45345099	control	10	OK	92.1565	206.732	1.16561	3.69764	0.00035	0.0331638	yes
zgc:158423	NC_007118.6:20283897-20290577	control	10	OK	13.6238	7.02335	-0.955895	-2.85012	0.00475	0.203555	no
zgc:158446	NC_007132.6:27412173-27424431	control	10	OK	0.99525	2.61995	1.39641	3.0666	0.00375	0.17436	no
zgc:158564	NC_007118.6:39392991-39407513	control	10	OK	18.027	27.5393	0.61133	1.81644	0.04855	0.726076	no
zgc:158846	NC_007117.6:39339194-39346726	control	10	OK	8.90788	2.01435	-2.14477	-5.4031	5e-05	0.00654421	yes
zgc:162184	NC_007128.6:45665609-45695978	control	10	OK	1.01688	2.11954	1.05961	2.39727	0.0177	0.45053	no
zgc:162898	NC_007129.6:19893864-19894909	control	10	OK	1.93901	0.566298	-1.77568	-2.5391	0.0282	0.568571	no
zgc:162925	NC_007135.6:38730637-38758141	control	10	OK	5.694	11.788	1.04981	3.0881	0.00115	0.0798874	no
zgc:162999	NC_007117.6:16992411-17062348	control	10	OK	51.7276	28.0522	-0.882822	-2.44874	0.0133	0.385794	no
zgc:163022	NC_007135.6:29768856-29789294	control	10	OK	3.12466	29.4131	3.23469	9.34463	5e-05	0.00654421	yes
zgc:163057	NC_007123.6:20214212-20215400	control	10	OK	6.48685	14.4683	1.15731	2.81097	0.00685	0.261536	no
zgc:163083	NC_007114.6:44875667-44879166	control	10	OK	1.0381	2.87903	1.47164	2.31952	0.0315	0.601507	no
zgc:165582	NC_007114.6:51837935-51856942	control	10	OK	0.265323	0.727644	1.45548	2.30605	0.03055	0.590777	no
zgc:171929	NW_003334844.1:191-1193	control	10	OK	1.07194	0	#NAME?	#NAME?	0.02325	0.517001	no
zgc:172323	NC_007127.6:32782557-32789623	control	10	OK	1.4515	0.670569	-1.11409	-2.02968	0.0414	0.684199	no
zgc:173593	NC_007114.6:31980262-31981750	control	10	OK	1.90577	41.0591	4.42926	8.96755	5e-05	0.00654421	yes
zgc:173594	NC_007114.6:32007823-32009369	control	10	OK	6.76195	107.025	3.98437	10.6879	5e-05	0.00654421	yes
zgc:174006	NC_007114.6:25981904-25984755	control	10	OK	3.95455	8.58372	1.11809	3.23833	0.0014	0.0910234	no
zgc:174153	NC_007123.6:16827516-16829977	control	10	OK	0.717671	1.76813	1.30083	2.10154	0.0478	0.719652	no
zgc:174260	NC_007116.6:28212322-28218456	control	10	OK	0.798064	0.193938	-2.04091	-2.38838	0.04455	0.701805	no
zgc:174710	NC_007134.6:29892912-29896018	control	10	OK	8.55171	17.3622	1.02166	3.06755	0.00265	0.13973	no
zgc:174855	NC_007123.6:16816936-16819445	control	10	OK	2.38113	8.28201	1.79833	4.19171	0.00025	0.0256683	yes
zgc:174888	NC_007127.6:13964951-13969045	control	10	OK	5.81105	9.37813	0.690501	1.96852	0.0491	0.727646	no
zgc:174904	NC_007130.6:5772680-5781430	control	10	OK	5.31387	2.84208	-0.902818	-2.29349	0.0253	0.540116	no
zgc:174917	NC_007125.6:11198895-11201331	control	10	OK	0.533714	2.87352	2.42868	4.04635	0.00165	0.102065	no
zgc:193505	NC_007124.6:22545334-22548040	control	10	OK	93.7171	221.144	1.2386	3.92706	0.0002	0.0215787	yes
zgc:193726	NC_007115.6:20053830-20054508	control	10	OK	1.28936	0	#NAME?	#NAME?	0.00415	0.186041	no
zgc:193865	NC_007114.6:32025147-32039759	control	10	OK	5.0858	2.38662	-1.0915	-2.19586	0.02915	0.578071	no
zgc:194125	NC_007114.6:31993632-31994748	control	10	OK	3.69238	66.4552	4.16976	9.55328	5e-05	0.00654421	yes
zgc:194392	NC_007128.6:30683739-30685428	control	10	OK	6.63097	12.5145	0.916311	2.10083	0.03	0.58515	no
zgc:198419,zgc:92066	NC_007114.6:31967944-31974960	control	10	OK	181.351	608.496	1.74646	5.21541	5e-05	0.00654421	yes
zgc:55891	NC_007125.6:16472059-16504786	control	10	OK	13.1585	22.4584	0.771258	2.5246	0.0118	0.357229	no
zgc:56148	NC_007127.6:16324643-16329883	control	10	OK	14.5752	9.5865	-0.604444	-1.93002	0.04595	0.710277	no
zgc:56306	NC_007112.6:28407399-28425523	control	10	OK	2.75404	4.55943	0.727306	2.16532	0.0302	0.586926	no
zgc:56699	NC_007134.6:32174712-32180928	control	10	OK	5.65331	12.094	1.09712	2.80528	0.00675	0.258564	no
zgc:63489	NC_007127.6:54930775-54936420	control	10	OK	3.92232	6.26609	0.67586	2.01212	0.0437	0.700711	no
zgc:63972	NC_007116.6:33340061-33359678	control	10	OK	2.88666	1.24973	-1.20779	-2.38112	0.02075	0.489079	no
zgc:64065	NC_007117.6:8919772-8925854	control	10	OK	0.590706	0.221984	-1.41198	-2.14667	0.0447	0.703212	no
zgc:65997	NC_007128.6:23529172-23532044	control	10	OK	3.48593	6.34514	0.864109	2.04807	0.04405	0.701336	no
zgc:66479	NC_007117.6:46734360-46740569	control	10	OK	26.4227	17.0377	-0.633052	-2.07132	0.0397	0.669859	no
zgc:73075	NC_007130.6:10420612-10433654	control	10	OK	3.65512	1.83946	-0.990634	-2.67008	0.0087	0.303538	no
zgc:73226	NC_007116.6:5859156-5886710	control	10	OK	0.571797	1.96656	1.7821	3.40151	0.00285	0.146955	no
zgc:73359	NW_003334236.1:359-19974	control	10	OK	13.4691	3.06506	-2.13567	-2.87646	0.0183	0.458797	no
zgc:77439	NC_007118.6:26028660-26036965	control	10	OK	22.2012	34.767	0.647081	2.0825	0.0327	0.610438	no
zgc:77748	NC_007114.6:13319591-13323089	control	10	OK	4.24573	2.36315	-0.845302	-1.96282	0.0499	0.731759	no
zgc:77938	NC_007125.6:35560598-35572115	control	10	OK	5.00018	2.74559	-0.864861	-2.0252	0.04025	0.674749	no
zgc:91909	NC_007119.6:50975894-51038982	control	10	OK	3.28627	8.7465	1.41226	2.26381	0.0275	0.562557	no
zgc:91909	NC_007119.6:50975894-51038982	control	10	OK	10.7579	20.696	0.943957	2.00562	0.0411	0.68117	no
zgc:92040	NC_007123.6:3889736-3904004	control	10	OK	13.3631	6.24035	-1.09855	-3.28236	0.00135	0.0893488	no
zgc:92113	NC_007134.6:396784-406648	control	10	OK	19.6728	9.75719	-1.01167	-3.13952	0.00185	0.109875	no
zgc:92518	NC_007112.6:471600-476760	control	10	OK	10.7896	6.70083	-0.687223	-1.98458	0.0482	0.723341	no
zgc:92594	NC_007118.6:73606237-73613574	control	10	OK	4.37134	2.25848	-0.952725	-2.16532	0.03475	0.629573	no
zmp:0000001085	NC_007118.6:51540909-51549997	control	10	OK	5.31817	9.61823	0.854842	2.59918	0.01225	0.365948	no
zmynd8	NC_007122.6:18398653-18442179	control	10	OK	3.41218	1.72101	-0.98744	-2.81252	0.004	0.181524	no
znf532	NC_007132.6:10689378-10729463	control	10	OK	5.09832	2.58993	-0.97711	-2.85993	0.00385	0.177361	no
znf648	NC_007117.6:23787671-23953969	control	10	OK	8.53983	4.6264	-0.884317	-2.66553	0.0088	0.305504	no
znf804b	NC_007127.6:27883422-28070592	control	10	OK	1.12779	0.526683	-1.0985	-2.43096	0.016	0.427295	no
zranb2	NC_007117.6:37323446-37329593	control	10	OK	30.4264	17.5767	-0.791655	-2.56203	0.0081	0.291313	no

## Sheet: S2
Category	Term	Count	%	PValue	Genes	List Total	Pop Hits	Pop Total	Fold Enrichment	Bonferroni	Benjamini	FDR
KEGG_PATHWAY	dre00260:Glycine, serine and threonine metabolism	8	1.09141	0.000419845	ALAS1, ALAS2, CBSB, PHGDH, DAO.1, GNMT, PSAT1, SARDH	191	30	3954	5.52042	0.0419288	0.0419288	0.466743
KEGG_PATHWAY	dre00480:Glutathione metabolism	8	1.09141	0.0015953	GSS, GCLC, GPX4A, PGD, GSTP2, GPX1A, GCLM, GSTP1	191	37	3954	4.47602	0.150282	0.0781983	1.76297
KEGG_PATHWAY	dre00860:Porphyrin and chlorophyll metabolism	7	0.95498	0.0021381	ALAS1, FECH, ALAS2, CPOX, BLVRB, PPOX, HMBSB	191	29	3954	4.99693	0.196132	0.0701885	2.35635
KEGG_PATHWAY	dre00030:Pentose phosphate pathway	7	0.95498	0.00305898	TALDO1, PFKMA, ALDOAB, PGD, PFKMB, GPIB, FBP2	191	31	3954	4.67455	0.26838	0.0751497	3.35555
KEGG_PATHWAY	dre04115:p53 signaling pathway	10	1.36426	0.00387665	CDKN1A, CASP9, CASP3B, SERPINE1, DDB2, TP53, MDM2, APAF1, SESN2, GADD45AA	191	66	3954	3.1366	0.327119	0.0761795	4.23498
KEGG_PATHWAY	dre00010:Glycolysis / Gluconeogenesis	8	1.09141	0.0256358	LDHA, PFKMA, ALDOAB, PFKMB, HK2, GPIB, PGAM2, FBP2	191	61	3954	2.71496	0.929275	0.356924	25.1232
KEGG_PATHWAY	dre02010:ABC transporters	5	0.682128	0.0381094	ABCA1A, ABCC4, ABCC1, ABCC2, ABCA12	191	27	3954	3.83362	0.980997	0.432302	35.1354
KEGG_PATHWAY	dre04512:ECM-receptor interaction	8	1.09141	0.0402182	LAMB4, LAMB2, TNW, THBS4B, ITGB4, COL11A2, THBS2, COL2A1A	191	67	3954	2.47183	0.984809	0.407485	36.7021
KEGG_PATHWAY	dre04710:Circadian rhythm	4	0.545703	0.052333	CRY1A, CRY3, PER2, PER3	191	18	3954	4.60035	0.995842	0.456209	45.055
KEGG_PATHWAY	dre00910:Nitrogen metabolism	4	0.545703	0.0768605	CAHZ, CA4A, ASNS, CA2	191	21	3954	3.94316	0.999713	0.55769	58.9746

## Sheet: S3
Category	Term	Count	%	PValue	Genes	List Total	Pop Hits	Pop Total	Fold Enrichment	Bonferroni	Benjamini	FDR
GOTERM_BP_FAT	GO:0009628~response to abiotic stimulus	22	3.00136	1.80491e-09	GRK7A, GCLC, ZGC:174006, CRYAA, OPN1SW1, OPN1SW2, CAHZ, TP53, HSP70, PCDH15B, GNAT2, CRY5, CRY1A, OPN1MW1, CRY3, OPN1MW2, PER2, HSPB1, HSP70L, TRPV6, CA2, PER3, OPN1LW2, RHO	366	92	7504	4.90283	1.57027e-06	1.57027e-06	2.80106e-06
GOTERM_BP_FAT	GO:0009416~response to light stimulus	15	2.04638	2.55389e-08	GRK7A, OPN1SW1, OPN1SW2, TP53, PCDH15B, GNAT2, CRY5, CRY1A, OPN1MW1, CRY3, OPN1MW2, PER2, PER3, OPN1LW2, RHO	366	47	7504	6.54343	2.22186e-05	1.11094e-05	3.96343e-05
GOTERM_BP_FAT	GO:0009314~response to radiation	15	2.04638	3.68423e-07	GRK7A, OPN1SW1, OPN1SW2, TP53, PCDH15B, GNAT2, CRY5, CRY1A, OPN1MW1, CRY3, OPN1MW2, PER2, PER3, OPN1LW2, RHO	366	57	7504	5.39546	0.000320476	0.000106837	0.000571759
GOTERM_BP_FAT	GO:0050953~sensory perception of light stimulus	14	1.90996	9.8535e-07	SI:BUSM1-234G15.3, CRYAA, ZGC:73359, OPN1SW1, PRPH2B, PRPH2A, OPN1SW2, PCDH15B, GNAT2, OPN1MW1, PDE6C, OPN1MW2, OPN1LW2, RHO	366	53	7504	5.41582	0.000856888	0.000214291	0.00152917
GOTERM_BP_FAT	GO:0007601~visual perception	14	1.90996	9.8535e-07	SI:BUSM1-234G15.3, CRYAA, ZGC:73359, OPN1SW1, PRPH2B, PRPH2A, OPN1SW2, PCDH15B, GNAT2, OPN1MW1, PDE6C, OPN1MW2, OPN1LW2, RHO	366	53	7504	5.41582	0.000856888	0.000214291	0.00152917
GOTERM_BP_FAT	GO:0009583~detection of light stimulus	9	1.22783	7.47607e-06	OPN1MW1, GRK7A, OPN1SW1, OPN1MW2, OPN1SW2, PCDH15B, OPN1LW2, RHO, GNAT2	366	23	7504	8.02281	0.0064831	0.00129999	0.0116016
GOTERM_BP_FAT	GO:0044275~cellular carbohydrate catabolic process	13	1.77353	1.17191e-05	MDH1B, LDHA, TALDO1, ALDOAB, HKDC1, PGD, HK2, PGAM2, GPD1A, PFKMA, GCK, PFKMB, GPIB	366	56	7504	4.75956	0.0101438	0.00169783	0.0181854
GOTERM_BP_FAT	GO:0046164~alcohol catabolic process	13	1.77353	1.17191e-05	MDH1B, LDHA, TALDO1, ALDOAB, HKDC1, PGD, HK2, PGAM2, GPD1A, PFKMA, GCK, PFKMB, GPIB	366	56	7504	4.75956	0.0101438	0.00169783	0.0181854
GOTERM_BP_FAT	GO:0019320~hexose catabolic process	12	1.63711	2.54831e-05	LDHA, MDH1B, TALDO1, PFKMA, GCK, ALDOAB, HKDC1, PGD, PFKMB, HK2, GPIB, PGAM2	366	51	7504	4.82417	0.0219266	0.00316222	0.0395403
GOTERM_BP_FAT	GO:0046365~monosaccharide catabolic process	12	1.63711	2.54831e-05	LDHA, MDH1B, TALDO1, PFKMA, GCK, ALDOAB, HKDC1, PGD, PFKMB, HK2, GPIB, PGAM2	366	51	7504	4.82417	0.0219266	0.00316222	0.0395403
GOTERM_BP_FAT	GO:0006007~glucose catabolic process	12	1.63711	2.54831e-05	LDHA, MDH1B, TALDO1, PFKMA, GCK, ALDOAB, HKDC1, PGD, PFKMB, HK2, GPIB, PGAM2	366	51	7504	4.82417	0.0219266	0.00316222	0.0395403
GOTERM_BP_FAT	GO:0050890~cognition	14	1.90996	4.83675e-05	SI:BUSM1-234G15.3, CRYAA, ZGC:73359, OPN1SW1, PRPH2B, PRPH2A, OPN1SW2, PCDH15B, GNAT2, OPN1MW1, PDE6C, OPN1MW2, OPN1LW2, RHO	366	74	7504	3.8789	0.0412076	0.00524628	0.0750358
GOTERM_BP_FAT	GO:0007600~sensory perception	14	1.90996	4.83675e-05	SI:BUSM1-234G15.3, CRYAA, ZGC:73359, OPN1SW1, PRPH2B, PRPH2A, OPN1SW2, PCDH15B, GNAT2, OPN1MW1, PDE6C, OPN1MW2, OPN1LW2, RHO	366	74	7504	3.8789	0.0412076	0.00524628	0.0750358
GOTERM_BP_FAT	GO:0006006~glucose metabolic process	13	1.77353	4.8454e-05	MDH1B, LDHA, TALDO1, ALDOAB, HKDC1, PGD, HK2, PGAM2, PFKMA, GCK, PFKMB, GYS1, GPIB	366	64	7504	4.16462	0.0412798	0.00467305	0.0751701
GOTERM_BP_FAT	GO:0050877~neurological system process	17	2.31924	6.65714e-05	SI:BUSM1-234G15.3, ACHE, CRYAA, ZGC:73359, PRPH2B, OPN1SW1, PRPH2A, OPN1SW2, PCDH15B, GNAT2, ALDH1A2, EYA4, OPN1MW1, PDE6C, OPN1MW2, OPN1LW2, RHO	366	109	7504	3.19767	0.0562737	0.00577516	0.103263
GOTERM_BP_FAT	GO:0042592~homeostatic process	21	2.86494	7.45204e-05	ZGC:198419, FECH, GCLC, ATP1A2A, ZGC:194125, CA15A, TMX3, PDIA4, ZGC:173594, TFR1A, ZGC:173593, ZGC:136472, ALDH1A2, ZGC:109934, ALAS2, RYR3, PDIP5, SLC25A37, CA2, GLRX, ZGC:92066, SEPW2B	366	158	7504	2.72505	0.0627781	0.00587677	0.115587
GOTERM_BP_FAT	GO:0015674~di-, tri-valent inorganic cation transport	13	1.77353	9.01023e-05	ZGC:198419, CACNA1SB, ATP2A1L, ZGC:194125, ZGC:173594, CACNA1SA, ZGC:173593, ATP2B1B, ZGC:109934, RYR3, SLC8A2A, SLC25A37, TRPV6, ZGC:92066	366	68	7504	3.91964	0.0753986	0.00651142	0.13974
GOTERM_BP_FAT	GO:0007602~phototransduction	7	0.95498	9.95715e-05	OPN1MW1, GRK7A, OPN1SW1, OPN1MW2, OPN1SW2, OPN1LW2, RHO	366	17	7504	8.4423	0.0829851	0.00664181	0.154415
GOTERM_BP_FAT	GO:0016052~carbohydrate catabolic process	13	1.77353	0.00012056	MDH1B, LDHA, TALDO1, ALDOAB, HKDC1, PGD, HK2, PGAM2, GPD1A, PFKMA, GCK, PFKMB, GPIB	366	70	7504	3.80765	0.0995797	0.0074644	0.186935
GOTERM_BP_FAT	GO:0018298~protein-chromophore linkage	8	1.09141	0.000136475	SI:BUSM1-234G15.3, OPN1MW1, OPN1SW1, OPN1MW2, CRY-DASH, OPN1SW2, OPN1LW2, RHO	366	25	7504	6.56087	0.111962	0.00788483	0.211588
GOTERM_BP_FAT	GO:0009582~detection of abiotic stimulus	9	1.22783	0.000137923	OPN1MW1, GRK7A, OPN1SW1, OPN1MW2, OPN1SW2, PCDH15B, OPN1LW2, RHO, GNAT2	366	33	7504	5.59165	0.113081	0.00747205	0.213831
GOTERM_BP_FAT	GO:0009581~detection of external stimulus	9	1.22783	0.000137923	OPN1MW1, GRK7A, OPN1SW1, OPN1MW2, OPN1SW2, PCDH15B, OPN1LW2, RHO, GNAT2	366	33	7504	5.59165	0.113081	0.00747205	0.213831
GOTERM_BP_FAT	GO:0051606~detection of stimulus	9	1.22783	0.000172819	OPN1MW1, GRK7A, OPN1SW1, OPN1MW2, OPN1SW2, PCDH15B, OPN1LW2, RHO, GNAT2	366	34	7504	5.42719	0.139607	0.00880603	0.267864
GOTERM_BP_FAT	GO:0006096~glycolysis	10	1.36426	0.000178655	LDHA, MDH1B, PFKMA, GCK, ALDOAB, HKDC1, PFKMB, HK2, GPIB, PGAM2	366	43	7504	4.76808	0.143964	0.00859856	0.276897
GOTERM_BP_FAT	GO:0019725~cellular homeostasis	16	2.18281	0.00034981	ZGC:198419, GCLC, ZGC:194125, ATP1A2A, TMX3, PDIA4, ZGC:173594, TFR1A, ZGC:173593, ZGC:136472, ALDH1A2, ZGC:109934, RYR3, PDIP5, GLRX, SEPW2B, ZGC:92066	366	113	7504	2.90304	0.262425	0.0158928	0.541499
GOTERM_BP_FAT	GO:0019318~hexose metabolic process	13	1.77353	0.00049464	MDH1B, LDHA, TALDO1, ALDOAB, HKDC1, PGD, HK2, PGAM2, PFKMA, GCK, PFKMB, GYS1, GPIB	366	81	7504	3.29056	0.349779	0.0212922	0.764889
GOTERM_BP_FAT	GO:0010035~response to inorganic substance	9	1.22783	0.000674877	ATP7A, SLC11A2, CRY1A, ZGC:174006, PER2, IL1B, HSPB1, HSP70, HSP70L, TRPV6, ZGC:63972	366	41	7504	4.5006	0.444197	0.0275811	1.04224
GOTERM_BP_FAT	GO:0055080~cation homeostasis	10	1.36426	0.000683142	ZGC:198419, ZGC:109934, ZGC:194125, ATP1A2A, CA15A, RYR3, CA2, ZGC:173594, TFR1A, ZGC:173593, ZGC:92066	366	51	7504	4.02014	0.448182	0.0266625	1.05494
GOTERM_BP_FAT	GO:0006826~iron ion transport	6	0.818554	0.000741268	ZGC:198419, ZGC:109934, ZGC:194125, SLC25A37, ZGC:173594, ZGC:173593, ZGC:92066	366	16	7504	7.68852	0.475412	0.0276599	1.14421
GOTERM_BP_FAT	GO:0005996~monosaccharide metabolic process	13	1.77353	0.000772368	MDH1B, LDHA, TALDO1, ALDOAB, HKDC1, PGD, HK2, PGAM2, PFKMA, GCK, PFKMB, GYS1, GPIB	366	85	7504	3.13571	0.489426	0.0276205	1.19195
GOTERM_BP_FAT	GO:0050801~ion homeostasis	11	1.50068	0.000831822	ZGC:198419, ALDH1A2, ZGC:109934, ZGC:194125, ATP1A2A, CA15A, RYR3, CA2, ZGC:173594, TFR1A, ZGC:173593, ZGC:92066	366	63	7504	3.57984	0.515184	0.0285442	1.28315
GOTERM_BP_FAT	GO:0033014~tetrapyrrole biosynthetic process	6	0.818554	0.00100864	ALAS1, FECH, ALAS2, CPOX, PPOX, HMBSB	366	17	7504	7.23626	0.58437	0.0332039	1.55392
GOTERM_BP_FAT	GO:0030005~cellular di-, tri-valent inorganic cation homeostasis	8	1.09141	0.0010459	ZGC:198419, ZGC:109934, ZGC:194125, ATP1A2A, RYR3, ZGC:173594, TFR1A, ZGC:173593, ZGC:92066	366	34	7504	4.82417	0.597641	0.0331568	1.61088
GOTERM_BP_FAT	GO:0055066~di-, tri-valent inorganic cation homeostasis	8	1.09141	0.00125371	ZGC:198419, ZGC:109934, ZGC:194125, ATP1A2A, RYR3, ZGC:173594, TFR1A, ZGC:173593, ZGC:92066	366	35	7504	4.68634	0.664258	0.0382291	1.92804
GOTERM_BP_FAT	GO:0048878~chemical homeostasis	11	1.50068	0.00152478	ZGC:198419, ALDH1A2, ZGC:109934, ZGC:194125, ATP1A2A, CA15A, RYR3, CA2, ZGC:173594, TFR1A, ZGC:173593, ZGC:92066	366	68	7504	3.31662	0.734879	0.0447462	2.34031
GOTERM_BP_FAT	GO:0006879~cellular iron ion homeostasis	6	0.818554	0.00174882	ZGC:198419, ZGC:109934, ZGC:194125, ZGC:173594, TFR1A, ZGC:173593, ZGC:92066	366	19	7504	6.47455	0.7819	0.0494933	2.67983
GOTERM_BP_FAT	GO:0055072~iron ion homeostasis	6	0.818554	0.00174882	ZGC:198419, ZGC:109934, ZGC:194125, ZGC:173594, TFR1A, ZGC:173593, ZGC:92066	366	19	7504	6.47455	0.7819	0.0494933	2.67983
GOTERM_BP_FAT	GO:0046394~carboxylic acid biosynthetic process	10	1.36426	0.00200267	BCAT1, SCD, ZGC:92040, CH25H, CBSB, PHGDH, FADS2, LGSN, ASNS, PSAT1	366	59	7504	3.47504	0.825192	0.0547069	3.06319
GOTERM_BP_FAT	GO:0016053~organic acid biosynthetic process	10	1.36426	0.00200267	BCAT1, SCD, ZGC:92040, CH25H, CBSB, PHGDH, FADS2, LGSN, ASNS, PSAT1	366	59	7504	3.47504	0.825192	0.0547069	3.06319
GOTERM_BP_FAT	GO:0020027~hemoglobin metabolic process	4	0.545703	0.00204508	SLC11A2, ALAS2, CPOX, TFR1A	366	6	7504	13.6685	0.831538	0.0541371	3.12711
GOTERM_BP_FAT	GO:0042541~hemoglobin biosynthetic process	4	0.545703	0.00204508	SLC11A2, ALAS2, CPOX, TFR1A	366	6	7504	13.6685	0.831538	0.0541371	3.12711
GOTERM_BP_FAT	GO:0008652~cellular amino acid biosynthetic process	7	0.95498	0.0023279	BCAT1, ZGC:92040, CBSB, PHGDH, LGSN, ASNS, PSAT1	366	29	7504	4.94894	0.868353	0.0595938	3.55228
GOTERM_BP_FAT	GO:0055114~oxidation reduction	40	5.45703	0.00239953	LDHA, CYP1B1, ZGC:163022, ZGC:123284, HSD17B14, HMGCRA, PGD, PPOX, GPD1A, GCLM, ALDH1A2, P4HA2, ZGC:163083, HIF1AN, CH25H, CPOX, DAO.1, GPX1A, NDUFA4, CYP1C2, SQRDL, MDH1B, CYP1C1, ZGC:77938, RDH12L, SCD, ZGC:92040, CBR1L, GPX4A, FADS2, HGD, ZGC:65997, RDH1, GMPR, PTGS2B, HAO2, PHGDH, PLOD1A, HSD17B12A, ZGC:77439	366	504	7504	1.6272	0.876325	0.0596221	3.65969
GOTERM_BP_FAT	GO:0030003~cellular cation homeostasis	8	1.09141	0.00242576	ZGC:198419, ZGC:109934, ZGC:194125, ATP1A2A, RYR3, ZGC:173594, TFR1A, ZGC:173593, ZGC:92066	366	39	7504	4.20569	0.879122	0.0585845	3.699
GOTERM_BP_FAT	GO:0006873~cellular ion homeostasis	9	1.22783	0.00258887	ZGC:198419, ALDH1A2, ZGC:109934, ZGC:194125, ATP1A2A, RYR3, ZGC:173594, TFR1A, ZGC:173593, ZGC:92066	366	50	7504	3.69049	0.895151	0.0607235	3.94307
GOTERM_BP_FAT	GO:0009584~detection of visible light	4	0.545703	0.0034503	GRK7A, PCDH15B, RHO, GNAT2	366	7	7504	11.7158	0.950558	0.0780543	5.22251
GOTERM_BP_FAT	GO:0033013~tetrapyrrole metabolic process	6	0.818554	0.00351157	ALAS1, FECH, ALAS2, CPOX, PPOX, HMBSB	366	22	7504	5.59165	0.953133	0.0773802	5.31291
GOTERM_BP_FAT	GO:0006979~response to oxidative stress	6	0.818554	0.00351157	CRY1A, GCLC, PTGS2B, GPX4A, PER2, GPX1A	366	22	7504	5.59165	0.953133	0.0773802	5.31291
GOTERM_BP_FAT	GO:0055082~cellular chemical homeostasis	9	1.22783	0.00376517	ZGC:198419, ALDH1A2, ZGC:109934, ZGC:194125, ATP1A2A, RYR3, ZGC:173594, TFR1A, ZGC:173593, ZGC:92066	366	53	7504	3.4816	0.962443	0.0807075	5.68619
GOTERM_BP_FAT	GO:0044271~nitrogen compound biosynthetic process	22	3.00136	0.00391426	BCAT1, ADSS, ADSSL1, FECH, ATP2A1L, ATP1A2A, ZGC:92040, CBSB, PPOX, HMBSB, ASNS, ATP2B1B, GC3, ATP7A, ALAS1, ALAS2, CPOX, PHGDH, GUCY1A3, LGSN, ZGC:55891, PSAT1	366	230	7504	1.96113	0.967028	0.0817653	5.90499
GOTERM_BP_FAT	GO:0001666~response to hypoxia	6	0.818554	0.00431106	NPC1, LDHA, ALAS2, BA1L, MB, IGFBP1A	366	23	7504	5.34854	0.976687	0.0875996	6.48502
GOTERM_BP_FAT	GO:0070482~response to oxygen levels	6	0.818554	0.00431106	NPC1, LDHA, ALAS2, BA1L, MB, IGFBP1A	366	23	7504	5.34854	0.976687	0.0875996	6.48502
GOTERM_BP_FAT	GO:0051186~cofactor metabolic process	13	1.77353	0.00443142	GSS, MDH1B, FECH, GCLC, TALDO1, ALAS2, CPOX, HMGCRA, PGD, PPOX, FPGS, SI:DKEYP-89C11.1, DCAKD	366	104	7504	2.56284	0.979014	0.0878928	6.66031
GOTERM_BP_FAT	GO:0030001~metal ion transport	22	3.00136	0.00460958	ZGC:198419, CACNA1SB, ATP2A1L, SLC12A3, ZGC:194125, CA15A, ZGC:173594, CACNA1SA, ZGC:173593, KCNJ11, ATP2B1B, ATP7A, ZGC:109934, RYR3, SLC8A2A, SLC25A37, SLC13A2, SLC5A9, TRPV6, CA2, ZGC:77748, SLC5A11, ZGC:92066	366	233	7504	1.93588	0.98204	0.089243	6.91919
GOTERM_BP_FAT	GO:0030239~myofibril assembly	6	0.818554	0.00747695	MEF2A, ACHE, CXCR4A, TTNB, MYH6, TTNA	366	26	7504	4.7314	0.99854	0.13791	10.9945
GOTERM_BP_FAT	GO:0000041~transition metal ion transport	7	0.95498	0.00821301	ZGC:198419, ATP7A, ZGC:109934, ZGC:194125, SLC25A37, ZGC:173594, ZGC:173593, ZGC:92066	366	37	7504	3.8789	0.999234	0.147379	12.0134
GOTERM_BP_FAT	GO:0010927~cellular component assembly involved in morphogenesis	6	0.818554	0.00881831	MEF2A, ACHE, CXCR4A, TTNB, MYH6, TTNA	366	27	7504	4.55616	0.99955	0.154241	12.843
GOTERM_BP_FAT	GO:0006091~generation of precursor metabolites and energy	15	2.04638	0.0101229	NDUFA4, LDHA, MDH1B, ZGC:163022, ALDOAB, HKDC1, HK2, FADS2, PGAM2, PFKMA, GCK, PFKMB, GYS1, GPIB, ZGC:55891	366	144	7504	2.1357	0.999857	0.171663	14.6064
GOTERM_BP_FAT	GO:0009069~serine family amino acid metabolic process	5	0.682128	0.0119325	GCLC, CBSB, PHGDH, PSAT1, SARDH	366	19	7504	5.39546	0.999971	0.195534	16.9972
GOTERM_BP_FAT	GO:0009309~amine biosynthetic process	7	0.95498	0.0120027	BCAT1, ZGC:92040, CBSB, PHGDH, LGSN, ASNS, PSAT1	366	40	7504	3.58798	0.999973	0.192973	17.0887
GOTERM_BP_FAT	GO:0009617~response to bacterium	7	0.95498	0.0135011	TNFRSF1A, CEBPB, MMP9, ZGC:158446, IL1B, CTSD, RNASEL3	366	41	7504	3.50047	0.999993	0.21063	19.0188
GOTERM_BP_FAT	GO:0007160~cell-matrix adhesion	5	0.682128	0.0170688	THBS4B, ITGB4, PARVB, EPD, ITGBL1	366	21	7504	4.8816	1	0.25449	23.4465
GOTERM_BP_FAT	GO:0031589~cell-substrate adhesion	5	0.682128	0.0170688	THBS4B, ITGB4, PARVB, EPD, ITGBL1	366	21	7504	4.8816	1	0.25449	23.4465
GOTERM_BP_FAT	GO:0031032~actomyosin structure organization	6	0.818554	0.0204427	MEF2A, ACHE, CXCR4A, TTNB, MYH6, TTNA	366	33	7504	3.72777	1	0.292181	27.4244
GOTERM_BP_FAT	GO:0050908~detection of light stimulus involved in visual perception	3	0.409277	0.0213955	PCDH15B, RHO, GNAT2	366	5	7504	12.3016	1	0.298841	28.5122
GOTERM_BP_FAT	GO:0050962~detection of light stimulus involved in sensory perception	3	0.409277	0.0213955	PCDH15B, RHO, GNAT2	366	5	7504	12.3016	1	0.298841	28.5122
GOTERM_BP_FAT	GO:0006971~hypotonic response	3	0.409277	0.0213955	CAHZ, CA2, TRPV6	366	5	7504	12.3016	1	0.298841	28.5122
GOTERM_BP_FAT	GO:0042539~hypotonic salinity response	3	0.409277	0.0213955	CAHZ, CA2, TRPV6	366	5	7504	12.3016	1	0.298841	28.5122
GOTERM_BP_FAT	GO:0006779~porphyrin biosynthetic process	4	0.545703	0.0226806	FECH, ALAS2, CPOX, PPOX	366	13	7504	6.30853	1	0.309002	29.9553
GOTERM_BP_FAT	GO:0009408~response to heat	4	0.545703	0.0226806	GCLC, CRYAA, ZGC:174006, HSPB1, HSP70, HSP70L	366	13	7504	6.30853	1	0.309002	29.9553
GOTERM_BP_FAT	GO:0009266~response to temperature stimulus	5	0.682128	0.0234016	CRY3, GCLC, CRYAA, ZGC:174006, HSPB1, HSP70, HSP70L	366	23	7504	4.45712	1	0.312416	30.753
GOTERM_BP_FAT	GO:0055085~transmembrane transport	28	3.81992	0.0289193	SLC37A4, AQP4, SLC7A6, SLC25A22, ZGC:55891, TRPV6, MIPB, SLC25A43, MIPA, CACNA1SB, SLC25A4, SLC12A3, UCP1, CACNA1SA, SLC17A7, SLC16A9B, SI:CH211-117M20.5, SLC2A1A, SLC25A10, RYR3, ZGC:92113, SLC8A2A, ABCC4, SLC13A2, SLC25A37, SLC5A9, ABCC2, SLC5A11	366	379	7504	1.51471	1	0.366127	36.5819
GOTERM_BP_FAT	GO:0051188~cofactor biosynthetic process	8	1.09141	0.0299627	GSS, FECH, GCLC, ALAS2, CPOX, PPOX, FPGS, DCAKD	366	62	7504	2.64551	1	0.371436	37.6312
GOTERM_BP_FAT	GO:0006812~cation transport	24	3.27422	0.0308408	ZGC:198419, ATP2A1L, ZGC:194125, ATP1A2A, KCNJ11, ATP2B1B, ZGC:109934, ZGC:55891, TRPV6, CACNA1SB, CA15A, SLC12A3, ZGC:173594, CACNA1SA, ZGC:173593, ATP7A, RYR3, SLC8A2A, SLC5A9, SLC13A2, SLC25A37, CA2, SLC5A11, ZGC:77748, ZGC:92066	366	313	7504	1.57209	1	0.374932	38.5016
GOTERM_BP_FAT	GO:0015669~gas transport	4	0.545703	0.0335842	ZGC:163057, HBBE3, BA1L, MB	366	15	7504	5.4674	1	0.395729	41.1484
GOTERM_BP_FAT	GO:0015671~oxygen transport	4	0.545703	0.0335842	ZGC:163057, HBBE3, BA1L, MB	366	15	7504	5.4674	1	0.395729	41.1484
GOTERM_BP_FAT	GO:0006732~coenzyme metabolic process	9	1.22783	0.0350187	GSS, MDH1B, TALDO1, GCLC, PGD, HMGCRA, SI:DKEYP-89C11.1, FPGS, DCAKD	366	78	7504	2.3657	1	0.403619	42.4896
GOTERM_BP_FAT	GO:0043068~positive regulation of programmed cell death	6	0.818554	0.0355252	CASP9, BBC3, RELA, TP53, BIK, ZGC:73226	366	38	7504	3.23727	1	0.403031	42.9563
GOTERM_BP_FAT	GO:0010942~positive regulation of cell death	6	0.818554	0.0355252	CASP9, BBC3, RELA, TP53, BIK, ZGC:73226	366	38	7504	3.23727	1	0.403031	42.9563
GOTERM_BP_FAT	GO:0043065~positive regulation of apoptosis	6	0.818554	0.0355252	CASP9, BBC3, RELA, TP53, BIK, ZGC:73226	366	38	7504	3.23727	1	0.403031	42.9563
GOTERM_BP_FAT	GO:0006816~calcium ion transport	7	0.95498	0.0361314	CACNA1SB, ATP2A1L, RYR3, SLC8A2A, TRPV6, CACNA1SA, ATP2B1B	366	51	7504	2.8141	1	0.40333	43.5102
GOTERM_BP_FAT	GO:0006811~ion transport	30	4.09277	0.0385164	ZGC:198419, ATP2A1L, ATP1A2A, ZGC:194125, KCNJ11, ATP2B1B, ZGC:109934, SLC25A22, ZGC:55891, TRPV6, CACNA1SB, SLC12A3, CA15A, GLRA4A, ZGC:173594, CACNA1SA, ZGC:173593, ATP7A, GRIA3A, RYR3, SLC8A2A, SLC5A9, ABCC4, SLC13A2, SLC25A37, CLICA, CA2, CHRNE, ZGC:77748, SLC5A11, ZGC:92066	366	424	7504	1.45067	1	0.418653	45.6408
GOTERM_BP_FAT	GO:0009310~amine catabolic process	5	0.682128	0.0398618	ACHE, ZGC:163022, ZGC:92040, HGD, SARDH	366	27	7504	3.7968	1	0.42476	46.8094
GOTERM_BP_FAT	GO:0006563~L-serine metabolic process	3	0.409277	0.0421189	CBSB, PHGDH, PSAT1	366	7	7504	8.78689	1	0.437836	48.7171
GOTERM_BP_FAT	GO:0009651~response to salt stress	3	0.409277	0.0421189	CAHZ, CA2, TRPV6	366	7	7504	8.78689	1	0.437836	48.7171
GOTERM_BP_FAT	GO:0006970~response to osmotic stress	3	0.409277	0.0421189	CAHZ, CA2, TRPV6	366	7	7504	8.78689	1	0.437836	48.7171
GOTERM_BP_FAT	GO:0009070~serine family amino acid biosynthetic process	3	0.409277	0.0421189	CBSB, PHGDH, PSAT1	366	7	7504	8.78689	1	0.437836	48.7171
GOTERM_BP_FAT	GO:0030097~hemopoiesis	9	1.22783	0.0424353	SLC11A2, IRAK3, FECH, ALAS2, BA1L, PIM1, SLC25A37, VEGFAA, TFR1A	366	81	7504	2.27808	1	0.435373	48.9794
GOTERM_BP_FAT	GO:0042981~regulation of apoptosis	10	1.36426	0.0482803	GCLC, CASP9, ZGC:174006, SLC2A1A, BBC3, RELA, TP53, BIK, HSP70, HSP70L, APAF1, ZGC:73226	366	98	7504	2.09212	1	0.474057	53.6042
GOTERM_BP_FAT	GO:0006323~DNA packaging	6	0.818554	0.0515086	ZGC:110434, ZGC:110425, H1FX, ZGC:163061, ZGC:114104, TTNA	366	42	7504	2.92896	1	0.491651	55.9873
GOTERM_BP_FAT	GO:0045454~cell redox homeostasis	7	0.95498	0.0533437	ZGC:136472, GCLC, TMX3, PDIP5, PDIA4, SEPW2B, GLRX	366	56	7504	2.56284	1	0.499025	57.2905
GOTERM_BP_FAT	GO:0051345~positive regulation of hydrolase activity	4	0.545703	0.0541239	BBC3, TP53, VEGFAA, BIK	366	18	7504	4.55616	1	0.499212	57.8335
GOTERM_BP_FAT	GO:0006778~porphyrin metabolic process	4	0.545703	0.0541239	FECH, ALAS2, CPOX, PPOX	366	18	7504	4.55616	1	0.499212	57.8335
GOTERM_BP_FAT	GO:0055002~striated muscle cell development	6	0.818554	0.0560649	MEF2A, ACHE, CXCR4A, TTNB, MYH6, TTNA	366	43	7504	2.86085	1	0.50688	59.1565
GOTERM_BP_FAT	GO:0043067~regulation of programmed cell death	10	1.36426	0.056549	GCLC, CASP9, ZGC:174006, SLC2A1A, BBC3, RELA, TP53, BIK, HSP70, HSP70L, APAF1, ZGC:73226	366	101	7504	2.02997	1	0.505091	59.4803
GOTERM_BP_FAT	GO:0010941~regulation of cell death	10	1.36426	0.056549	GCLC, CASP9, ZGC:174006, SLC2A1A, BBC3, RELA, TP53, BIK, HSP70, HSP70L, APAF1, ZGC:73226	366	101	7504	2.02997	1	0.505091	59.4803
GOTERM_BP_FAT	GO:0048534~hemopoietic or lymphoid organ development	9	1.22783	0.0569741	SLC11A2, IRAK3, FECH, ALAS2, BA1L, PIM1, SLC25A37, VEGFAA, TFR1A	366	86	7504	2.14563	1	0.502976	59.7628
GOTERM_BP_FAT	GO:0002520~immune system development	9	1.22783	0.0569741	SLC11A2, IRAK3, FECH, ALAS2, BA1L, PIM1, SLC25A37, VEGFAA, TFR1A	366	86	7504	2.14563	1	0.502976	59.7628
GOTERM_BP_FAT	GO:0010038~response to metal ion	5	0.682128	0.0614979	ATP7A, SLC11A2, ZGC:174006, HSP70, HSP70L, TRPV6, ZGC:63972	366	31	7504	3.30689	1	0.525837	62.6562
GOTERM_BP_FAT	GO:0035162~embryonic hemopoiesis	5	0.682128	0.0614979	SLC11A2, IRAK3, ALAS2, SLC25A37, TFR1A	366	31	7504	3.30689	1	0.525837	62.6562
GOTERM_BP_FAT	GO:0009719~response to endogenous stimulus	4	0.545703	0.0620349	ACHE, GCLC, GLRA4A, VTG7	366	19	7504	4.31636	1	0.524264	62.9864
GOTERM_BP_FAT	GO:0055001~muscle cell development	6	0.818554	0.0658517	MEF2A, ACHE, CXCR4A, TTNB, MYH6, TTNA	366	45	7504	2.7337	1	0.5415	65.2561
GOTERM_BP_FAT	GO:0010033~response to organic substance	6	0.818554	0.0822003	ACHE, GCLC, TP53, IL1B, GLRA4A, VTG7	366	48	7504	2.56284	1	0.620598	73.5832
GOTERM_BP_FAT	GO:0018130~heterocycle biosynthetic process	6	0.818554	0.0822003	ALAS1, FECH, ALAS2, CPOX, PPOX, HMBSB	366	48	7504	2.56284	1	0.620598	73.5832
GOTERM_BP_FAT	GO:0006750~glutathione biosynthetic process	2	0.272851	0.0949217	GSS, GCLC	366	2	7504	20.5027	1	0.671236	78.7281
GOTERM_BP_FAT	GO:0007603~phototransduction, visible light	2	0.272851	0.0949217	GRK7A, RHO	366	2	7504	20.5027	1	0.671236	78.7281
GOTERM_BP_FAT	GO:0043043~peptide biosynthetic process	2	0.272851	0.0949217	GSS, GCLC	366	2	7504	20.5027	1	0.671236	78.7281
GOTERM_BP_FAT	GO:0009649~entrainment of circadian clock	2	0.272851	0.0949217	CRY1A, PER2	366	2	7504	20.5027	1	0.671236	78.7281
GOTERM_BP_FAT	GO:0043085~positive regulation of catalytic activity	5	0.682128	0.0955866	BBC3, ZGC:158263, TP53, VEGFAA, BIK	366	36	7504	2.8476	1	0.669262	78.9694
GOTERM_BP_FAT	GO:0000096~sulfur amino acid metabolic process	3	0.409277	0.0970999	GCLC, CBSB, GNMT	366	11	7504	5.59165	1	0.670707	79.5089
GOTERM_BP_FAT	GO:0030218~erythrocyte differentiation	4	0.545703	0.0984982	FECH, ALAS2, SLC25A37, TFR1A	366	23	7504	3.56569	1	0.671672	79.9959
GOTERM_BP_FAT	GO:0034101~erythrocyte homeostasis	4	0.545703	0.0984982	FECH, ALAS2, SLC25A37, TFR1A	366	23	7504	3.56569	1	0.671672	79.9959
GOTERM_BP_FAT	GO:0048872~homeostasis of number of cells	4	0.545703	0.0984982	FECH, ALAS2, SLC25A37, TFR1A	366	23	7504	3.56569	1	0.671672	79.9959

## Sheet: S4
Category Term Count % PValue Genes List Total Pop Hits Pop Total Fold Enrichment Bonferroni Benjamini FDR
GOTERM_CC_FAT GO:0005576~extracellular region 42 5.729877216916781 6.707535281237165E-5 ACHE, SST2, THBS4B, MMP9, GDF5, TTNB, LGALS3BPB, NOG3, ISM1, B2M, TNFB, CTSL1B, LAMB4, LAMB2, LECT1, SERPINE1, IL1B, MGC174857, HSPA5, COL11A2, NTF7, COL18A1, BGLAP, KAL1B, WNT4B, SPARCL1, FN1B, ZGC:158446, CYR61L1, IGFBP6B, MGC174152, ELNA, KAZALD3, TIMP2B, HEG, VEGFAA, GCGA, SPON2B, SPON2A, GNB3B, COL2A1A, E…
GOTERM_CC_FAT GO:0031012~extracellular matrix 15 2.046384720327422 2.057230406183517E-4 COL18A1, BGLAP, WNT4B, SPARCL1, MMP9, LGALS3BPB, LAMB4, LAMB2, ELNA, TIMP2B, SPON2B, COL11A2, SPON2A, COL2A1A, MMP13A 216 95 4330 3.1652046783625734 0.02959197719021578 0.014907099401389345 0.24424475718336502
GOTERM_CC_FAT GO:0005578~proteinaceous extracellular matrix 13 1.7735334242837655 0.0016057091434949046 LAMB4, LAMB2, WNT4B, ELNA, SPARCL1, TIMP2B, MMP9, LGALS3BPB, SPON2B, SPON2A, COL11A2, COL2A1A, MMP13A 216 91 4330 2.863756613756614 0.2091302207017266 0.07522731495691437 1.891922424037118
GOTERM_CC_FAT GO:0044421~extracellular region part 18 2.455661664392906 0.004401509945666246 COL18A1, BGLAP, WNT4B, SPARCL1, MMP9, LGALS3BPB, TNFB, LAMB4, LAMB2, ELNA, TIMP2B, SERPINE1, IL1B, SPON2B, COL11A2, SPON2A, COL2A1A, MMP13A 216 171 4330 2.1101364522417154 0.4748329443991619 0.14871620040255573 5.108016342194532
GOTERM_CC_FAT GO:0001750~photoreceptor outer segment 3 0.4092769440654843 0.007122131330858111 OPN1MW1, OPN1SW2, RHO 216 3 4330 20.046296296296294 0.6477984766111895 0.18836971091651789 8.144651542134785
GOTERM_CC_FAT GO:0031513~nonmotile primary cilium 3 0.4092769440654843 0.007122131330858111 OPN1MW1, OPN1SW2, RHO 216 3 4330 20.046296296296294 0.6477984766111895 0.18836971091651789 8.144651542134785
GOTERM_CC_FAT GO:0000786~nucleosome 6 0.8185538881309686 0.019373303109980797 ZGC:110434, ZGC:110425, H1FX, ZGC:163061, ZGC:114104, TTNA 216 32 4330 3.7586805555555554 0.9425166570863999 0.3787634449654391 20.747167204473836
GOTERM_CC_FAT GO:0005922~connexon complex 6 0.8185538881309686 0.019373303109980797 CX50.5, SI:DKEY-91F15.1, CX23, CX28.9, CX44.1, CX28.6 216 32 4330 3.7586805555555554 0.9425166570863999 0.3787634449654391 20.747167204473836
GOTERM_CC_FAT GO:0005882~intermediate filament 7 0.9549795361527967 0.02249500658606548 ZGC:136930, KRT1-19D, GFAP, ZGC:158846, ZGC:172323, WU:FB15E04, SI:CH211-133J6.3 216 45 4330 3.1183127572016462 0.9639112574298154 0.377828304194733 23.694438727480794
GOTERM_CC_FAT GO:0045111~intermediate filament cytoskeleton 7 0.9549795361527967 0.02249500658606548 ZGC:136930, KRT1-19D, GFAP, ZGC:158846, ZGC:172323, WU:FB15E04, SI:CH211-133J6.3 216 45 4330 3.1183127572016462 0.9639112574298154 0.377828304194733 23.694438727480794
GOTERM_CC_FAT GO:0032993~protein-DNA complex 6 0.8185538881309686 0.024713776987465637 ZGC:110434, ZGC:110425, H1FX, ZGC:163061, ZGC:114104, TTNA 216 34 4330 3.537581699346405 0.9741008775775896 0.3666254174467799 25.727823911190693
GOTERM_CC_FAT GO:0005921~gap junction 6 0.8185538881309686 0.02770590066284979 CX50.5, SI:DKEY-91F15.1, CX23, CX28.9, CX44.1, CX28.6 216 35 4330 3.4365079365079363 0.9834629927695877 0.36605618584360344 28.391386418519716
GOTERM_CC_FAT GO:0005783~endoplasmic reticulum 20 2.728512960436562 0.031065001747269907 KDELR3, SGK1, FKBP7, SCD, HMGCRA, FADS2, CNPY2, PDIA4, ZGC:136472, HSP90B1, P4HA2, CH25H, INSIG1, PDIP5, RTN2B, HSPA5, RCN3, PLOD1A, HSD17B12A, RTN2A 216 243 4330 1.6499009297363205 0.9900225884772801 0.3691853242564639 31.277204303805817
GOTERM_CC_FAT GO:0005911~cell-cell junction 9 1.227830832196453 0.08066288871147093 CX50.5, SI:DKEY-91F15.1, CLDNB, CX23, CX28.9, ZGC:153311, CX44.1, CLDNK, CX28.6 216 91 4330 1.9826007326007327 0.9999953514275187 0.6725003249926156 63.198243443622395
GOTERM_CC_FAT GO:0030054~cell junction 13 1.7735334242837655 0.08207285137896561 GRIA3A, ACHE, CX50.5, SI:DKEY-91F15.1, GLRA4A, CLDNB, CX23, CX28.9, ZGC:153311, CX44.1, CLDNK, CHRNE, CX28.6 216 155 4330 1.6813022700119473 0.9999962846532467 0.6472232571988757 63.86352852823711
GOTERM_CC_FAT GO:0005833~hemoglobin complex 3 0.4092769440654843 0.08491580569214664 ZGC:163057, HBBE3, BA1L 216 10 4330 6.013888888888888 0.9999976378150388 0.6308711477423801 65.17158929846076

## Sheet: S5
Category	Term	Count	%	PValue	Genes	List Total	Pop Hits	Pop Total	Fold Enrichment	Bonferroni	Benjamini	FDR
GOTERM_MF_FAT	GO:0005212~structural constituent of eye lens	6	0.818554	5.18847e-05	CRYGN2, CRYAA, LIM2.5, LIM2.4, LIM2.1, LIM2.3	406	10	8417	12.4389	0.0239902	0.0239902	0.0739955
GOTERM_MF_FAT	GO:0009881~photoreceptor activity	8	1.09141	7.10347e-05	SI:BUSM1-234G15.3, OPN1MW1, GRK7A, OPN1SW1, OPN1MW2, OPN1SW2, OPN1LW2, RHO	406	23	8417	7.21097	0.0326988	0.0164853	0.101294
GOTERM_MF_FAT	GO:0019842~vitamin binding	15	2.04638	0.000316315	DDC, SCD, LEPR, CBSB, VDRA, ATP7A, SI:CH211-117M20.5, ALAS1, ALAS2, P4HA2, GNMT, PSAT1, PLOD1A, GPT2, RHO	406	101	8417	3.07894	0.137619	0.0481548	0.450323
GOTERM_MF_FAT	GO:0003913~DNA photolyase activity	5	0.682128	0.000548614	CRY1B, CRY5, CRY1A, CRY3, CRY-DASH	406	9	8417	11.5175	0.226494	0.0621877	0.779836
GOTERM_MF_FAT	GO:0004197~cysteine-type endopeptidase activity	12	1.63711	0.00105998	CTSL1B, MGC174152, CASP9, CASP3B, ZGC:174153, MGC174857, TTNB, ZGC:136872, CTSC, CTSSB.1, CTSBA, ZGC:162184, TTNA, CASPB	406	77	8417	3.23089	0.391242	0.094499	1.50163
GOTERM_MF_FAT	GO:0008199~ferric iron binding	5	0.682128	0.00192018	ZGC:198419, ZGC:109934, ZGC:194125, ZGC:173594, ZGC:173593, ZGC:92066	406	12	8417	8.63814	0.59323	0.139221	2.7048
GOTERM_MF_FAT	GO:0005509~calcium ion binding	37	5.04775	0.00268705	S100A10A, FKBP7, THBS4B, MMP9, ANXA1C, PCDH15B, ANXA3A, ANXA6, POC1BL, EEF2K, RCV1, PLCD1A, PVALB3, BGLAP, CACNA1SB, PVALB8, FREM2B, SPARCL1, PVALB6, S100T, ANXA2A, ZGC:110283, ACTN2, CACNA1SA, S100Z, PKD2L1, STAT3, ACTN3B, ACTN3A, CDH17, RYR3, HEG, ZGC:136872, ZGC:73075, RCN3, EPD, MMP13A	406	462	8417	1.66032	0.716128	0.164638	3.76588
GOTERM_MF_FAT	GO:0019200~carbohydrate kinase activity	5	0.682128	0.00472026	PFKMA, GCK, HKDC1, PFKMB, HK2	406	15	8417	6.91051	0.890772	0.241786	6.52731
GOTERM_MF_FAT	GO:0005506~iron ion binding	23	3.13779	0.00487373	CYP51, ZGC:198419, CYP1C2, CYP1C1, CYP1B1, FECH, ZGC:163057, ZGC:194125, SCD, FADS2, ZGC:173594, ZGC:173593, ZGC:109934, HIF1AN, P4HA2, HBBE3, PTGS2B, CH25H, BA1L, SLC25A37, NENF, PLOD1A, MB, ZGC:92066	406	252	8417	1.89216	0.898377	0.22435	6.73272
GOTERM_MF_FAT	GO:0005544~calcium-dependent phospholipid binding	5	0.682128	0.00762585	ANXA6, ANXA1C, ANXA2A, ZGC:110283, ANXA3A	406	17	8417	6.09751	0.972196	0.301107	10.3459
GOTERM_MF_FAT	GO:0004857~enzyme inhibitor activity	12	1.63711	0.0111269	KNG1, CDKN1A, ZGC:174260, KAL1B, TIMP2B, AGT, SERPINE1, ANXA2A, SPINT1A, SI:DKEY-117N7.5, ANXA3A, AHSG	406	104	8417	2.3921	0.994682	0.378769	14.7542
GOTERM_MF_FAT	GO:0004396~hexokinase activity	3	0.409277	0.0129897	GCK, HKDC1, HK2	406	4	8417	15.5486	0.997799	0.399454	17.0167
GOTERM_MF_FAT	GO:0004175~endopeptidase activity	24	3.27422	0.0139512	TMPRSS4A, HGFA, THOP1, CASP3B, MMP9, ZGC:158446, TTNB, CTSSB.1, ZGC:100868, HE1B, CASPB, TTNA, HE1A, CTSL1B, MGC174152, ZGC:112285, CASP9, ZGC:101788, ZGC:174153, MGC174857, CTSD, CTSC, ZGC:136872, CTSBA, PHEX, ZGC:162184, MMP13A	406	293	8417	1.69815	0.998605	0.396964	18.1626
GOTERM_MF_FAT	GO:0043176~amine binding	7	0.95498	0.016111	ATP7A, GCLC, DRD3, LEPR, SCD, DRD4-RS, GNMT	406	43	8417	3.3749	0.9995	0.41897	20.683
GOTERM_MF_FAT	GO:0008234~cysteine-type peptidase activity	12	1.63711	0.0164793	CTSL1B, MGC174152, CASP9, CASP3B, ZGC:174153, MGC174857, TTNB, ZGC:136872, CTSC, CTSSB.1, CTSBA, ZGC:162184, TTNA, CASPB	406	110	8417	2.26162	0.999581	0.40455	21.1056
GOTERM_MF_FAT	GO:0005198~structural molecule activity	25	3.41064	0.019343	COL18A1, ZGC:136930, ZGC:136826, GFAP, ZGC:153049, THBS4B, CRYAA, ZGC:172323, WU:FB15E04, CLDNB, SI:CH211-133J6.3, TTNA, KRT1-19D, CRYGN2, ELNA, LIM2.5, LIM2.4, ZGC:158846, LIM2.1, LIM2.3, ZGC:153311, SI:DKEY-117N7.5, CLDNK, COL11A2, COL2A1A	406	319	8417	1.62473	0.999893	0.435225	24.3203
GOTERM_MF_FAT	GO:0015294~solute:cation symporter activity	8	1.09141	0.0308198	FRAS1, SLC1A4, SLC2A1A, SLC6A8, SLC12A3, SI:CH211-225B11.1, SLC6A4A, ZGC:162925	406	63	8417	2.63257	1	0.577599	36.0205
GOTERM_MF_FAT	GO:0004089~carbonate dehydratase activity	4	0.545703	0.0326795	CA15A, CAHZ, CA4A, CA2	406	15	8417	5.52841	1	0.578469	37.7498
GOTERM_MF_FAT	GO:0019825~oxygen binding	4	0.545703	0.0326795	ZGC:163057, HBBE3, BA1L, MB	406	15	8417	5.52841	1	0.578469	37.7498
GOTERM_MF_FAT	GO:0005344~oxygen transporter activity	4	0.545703	0.0326795	ZGC:163057, HBBE3, BA1L, MB	406	15	8417	5.52841	1	0.578469	37.7498
GOTERM_MF_FAT	GO:0046906~tetrapyrrole binding	12	1.63711	0.0399294	CYP51, CYP1C2, SI:CH211-117M20.5, CYP1C1, CYP1B1, ZGC:163057, HBBE3, PTGS2B, BA1L, FADS2, NENF, MB	406	126	8417	1.97443	1	0.633479	44.0849
GOTERM_MF_FAT	GO:0016597~amino acid binding	5	0.682128	0.0433463	ATP7A, GCLC, LEPR, SCD, GNMT	406	28	8417	3.70206	1	0.645463	46.8579
GOTERM_MF_FAT	GO:0030414~peptidase inhibitor activity	9	1.22783	0.048336	KNG1, ZGC:174260, KAL1B, TIMP2B, AGT, SERPINE1, SPINT1A, SI:DKEY-117N7.5, AHSG	406	84	8417	2.22124	1	0.668493	50.6783
GOTERM_MF_FAT	GO:0016769~transferase activity, transferring nitrogenous groups	5	0.682128	0.0595858	BCAT1, ALAS1, ALAS2, PSAT1, GPT2	406	31	8417	3.34379	1	0.729338	58.3745
GOTERM_MF_FAT	GO:0004198~calcium-dependent cysteine-type endopeptidase activity	4	0.545703	0.0604491	TTNB, ZGC:136872, ZGC:162184, TTNA	406	19	8417	4.36453	1	0.718818	58.9163
GOTERM_MF_FAT	GO:0020037~heme binding	11	1.50068	0.0630244	CYP51, CYP1C2, CYP1C1, CYP1B1, ZGC:163057, HBBE3, PTGS2B, BA1L, FADS2, NENF, MB	406	120	8417	1.90039	1	0.719003	60.494
GOTERM_MF_FAT	GO:0015293~symporter activity	8	1.09141	0.0643767	FRAS1, SLC1A4, SLC2A1A, SLC6A8, SLC12A3, SI:CH211-225B11.1, SLC6A4A, ZGC:162925	406	74	8417	2.24125	1	0.712253	61.2997
GOTERM_MF_FAT	GO:0004866~endopeptidase inhibitor activity	8	1.09141	0.0682197	KNG1, ZGC:174260, TIMP2B, AGT, SERPINE1, SPINT1A, SI:DKEY-117N7.5, AHSG	406	75	8417	2.21136	1	0.719687	63.5067
GOTERM_MF_FAT	GO:0015082~di-, tri-valent inorganic cation transmembrane transporter activity	5	0.682128	0.0719685	ATP7A, SLC11A2, ATP2A1L, SLC25A37, ATP2B1B	406	33	8417	3.14114	1	0.725998	65.5464
GOTERM_MF_FAT	GO:0016836~hydro-lyase activity	5	0.682128	0.0786135	CA15A, CAHZ, CBSB, CA4A, CA2	406	34	8417	3.04875	1	0.74551	68.9035
GOTERM_MF_FAT	GO:0070279~vitamin B6 binding	6	0.818554	0.0793607	DDC, ALAS1, ALAS2, CBSB, PSAT1, GPT2	406	48	8417	2.59144	1	0.736683	69.2614
GOTERM_MF_FAT	GO:0030170~pyridoxal phosphate binding	6	0.818554	0.0793607	DDC, ALAS1, ALAS2, CBSB, PSAT1, GPT2	406	48	8417	2.59144	1	0.736683	69.2614
GOTERM_MF_FAT	GO:0016563~transcription activator activity	6	0.818554	0.0850745	HOXB9A, GATA6, RELA, TFE3A, TP53, HOXA9A	406	49	8417	2.53855	1	0.750186	71.8738
GOTERM_MF_FAT	GO:0003870~5-aminolevulinate synthase activity	2	0.272851	0.093924	ALAS1, ALAS2	406	2	8417	20.7315	1	0.774408	75.5155
GOTERM_MF_FAT	GO:0016749~N-succinyltransferase activity	2	0.272851	0.093924	ALAS1, ALAS2	406	2	8417	20.7315	1	0.774408	75.5155

## Sheet: S6
gene	locus	sample_1	sample_2	status	value_1	value_2	log2(fold_change)	test_stat	p_value	q_value
aadac	NC_007126.6:1084396-1112876	control	15	OK	5.57569	3.17981	-0.810212	-2.07611	0.03385	0.621794
aadat	NC_007118.6:7444606-7462613	control	15	OK	8.57973	4.94632	-0.794575	-2.04953	0.04165	0.687196
aars	NC_007129.6:18647206-18678385	control	15	OK	43.1595	79.3029	0.877696	2.68477	0.00575	0.232467
abca12	NC_007120.6:40883823-41044700	control	15	OK	3.66074	9.0379	1.30385	4.11957	5e-05	0.00654421
abca1a	NC_007112.6:51925810-51993669	control	15	OK	5.37384	10.0143	0.898033	2.93733	0.00305	0.154537
abca1b	NC_007125.6:6117271-6212466	control	15	OK	11.2755	21.0756	0.902376	2.88284	0.00365	0.171648
abca4b	NC_007113.6:15534741-15626117	control	15	OK	1.2077	0.440756	-1.45421	-3.43163	0.0014	0.0910234
abcb11a	NC_007120.6:49061400-49119463	control	15	OK	0.519994	0.181102	-1.52169	-2.57346	0.01675	0.437644
abcb5	NC_007127.6:19730778-19762598	control	15	OK	18.4186	36.474	0.985701	2.85957	0.00315	0.156879
abcb6a	NC_007112.6:5437339-5463080	control	15	OK	2.58562	14.4145	2.47894	7.3068	5e-05	0.00654421
abcc1	NC_007114.6:36571648-36602104	control	15	OK	3.54985	5.85453	0.721795	2.30319	0.02355	0.520202
abcc2	NC_007124.6:551335-581297	control	15	OK	4.82654	19.5727	2.01978	6.47645	5e-05	0.00654421
abcc4	NC_007117.6:7165534-7234620	control	15	OK	7.15619	14.1629	0.984853	3.21281	0.00115	0.0798874
abcc9	NC_007115.6:14645320-14715631	control	15	OK	4.4235	2.43283	-0.862555	-2.56475	0.00845	0.298383
abcg2a	NC_007134.6:46061350-46092066	control	15	OK	6.67125	3.6935	-0.852969	-2.23948	0.02255	0.510844
abhd4	NC_007113.6:52052351-52064349	control	15	OK	6.36139	33.3632	2.39084	7.03858	5e-05	0.00654421
ablim2	NC_007123.6:22558886-22701737	control	15	OK	6.13111	3.77398	-0.700061	-2.06218	0.02945	0.580078
abrab	NC_007130.6:47180421-47186367	control	15	OK	5.01267	2.02934	-1.30457	-3.21669	0.00265	0.13973
acaca	NC_007116.6:55638365-55746043	control	15	OK	3.41437	5.44968	0.674553	2.13212	0.02755	0.56263
acana	NC_007118.6:48489044-48532405	control	15	OK	3.26467	0.588756	-2.4712	-4.38389	0.00035	0.0331638
acanb	NC_007136.6:19111691-19249056	control	15	OK	3.85471	1.12667	-1.77456	-3.58928	0.00095	0.0695108
acbd5b	NC_007113.6:10120833-10143613	control	15	OK	0.92223	0.0874363	-3.39882	-1.5084	0.0054	0.221774
acer1	NC_007119.6:20200165-20214084	control	15	OK	2.87449	7.40765	1.36571	3.40259	0.0009	0.0667592
acer2	NC_007118.6:71269638-71290632	control	15	OK	2.60571	5.90971	1.18141	3.20188	0.0006	0.0496031
ache	NC_007118.6:25805961-25816705	control	15	OK	28.5318	13.7717	-1.05086	-3.32187	0.00055	0.0465129
aclyb	NC_007123.6:13935414-14039767	control	15	OK	1.12083	0.48037	-1.22235	-2.49877	0.01365	0.39237
acmsd	NC_007120.6:23433424-23443001	control	15	OK	3.03306	1.45801	-1.05678	-2.20677	0.0317	0.603679
aco1	NC_007118.6:71217427-71248624	control	15	OK	11.7641	19.762	0.748344	2.14137	0.02675	0.554668
acoxl	NC_007124.6:47130934-47266635	control	15	OK	2.42235	1.3572	-0.835776	-2.06781	0.02945	0.580078
acta1a	NC_007112.6:53286215-53293789	control	15	OK	267.196	115.449	-1.21064	-3.62232	0.0003	0.0297548
acta1b	NC_007124.6:24148607-24153992	control	15	OK	2186.4	421.941	-2.37344	-5.04651	5e-05	0.00654421
acta2	NC_007123.6:16978608-16993856	control	15	OK	7.89312	2.74105	-1.52587	-3.80723	0.0004	0.0363284
actn2,p4ha1b	NC_007128.6:20099830-20147407	control	15	OK	23.8117	9.46263	-1.33136	-4.01033	5e-05	0.00654421
actn3a	NC_007132.6:27346257-27368278	control	15	OK	297.279	79.0315	-1.91132	-5.15808	5e-05	0.00654421
actn3b	NC_007118.6:6814962-6898486	control	15	OK	120.538	32.5472	-1.88888	-5.48791	5e-05	0.00654421
acy3.1	NC_007112.6:51864673-51870699	control	15	OK	0.822107	2.57622	1.64786	2.93243	0.00805	0.289961
adam23	NC_007117.6:12902281-12953691	control	15	OK	12.7465	8.29299	-0.620141	-1.95447	0.0455	0.708002
adamts18	NC_007118.6:42124751-42212595	control	15	OK	4.5585	2.96306	-0.621474	-1.9509	0.046	0.71058
adamts5	NC_007112.6:693482-719747	control	15	OK	1.71444	0.911219	-0.911867	-2.28947	0.02055	0.487787
adamtsl2	NC_007116.6:65204578-65253289	control	15	OK	0.697061	0.207645	-1.74717	-2.91722	0.00495	0.209942
adcy2a	NC_007127.6:9383620-9492774	control	15	OK	1.32003	0.434035	-1.60468	-3.19213	0.00245	0.132068
adprm	NC_007123.6:90490-93613	control	15	OK	0.788402	2.62154	1.73341	3.3258	0.00075	0.0584825
adra2c	NC_007112.6:40289051-40291725	control	15	OK	1.40272	0.52235	-1.42514	-2.57987	0.01195	0.359748
adss	NC_007124.6:11354399-11404464	control	15	OK	27.4449	11.1285	-1.30229	-3.7835	0.0002	0.0215787
adssl1	NC_007128.6:663432-695526	control	15	OK	44.0448	22.5642	-0.964937	-3.06768	0.0024	0.130884
aebp1	NC_007121.6:2779960-2811007	control	15	OK	6.07905	3.48477	-0.802783	-2.38487	0.01535	0.416448
aff3	NC_007120.6:21679900-21715785	control	15	OK	4.22463	2.64395	-0.676128	-1.9732	0.04565	0.708289
aglb	NC_007135.6:29796381-29834774	control	15	OK	5.0618	0.805069	-2.65247	-6.87288	5e-05	0.00654421
agmo	NC_007126.6:34476752-34560546	control	15	OK	3.30029	1.733	-0.929327	-2.12653	0.03965	0.669338
agrp2	NC_007113.6:7550869-7560247	control	15	OK	9.2644	4.21782	-1.1352	-2.40796	0.01435	0.403222
agtr1a	NC_007113.6:25272082-25277452	control	15	OK	0.887248	0.268946	-1.72202	-2.41077	0.03435	0.625889
agtr2	NC_007116.6:22738639-22745694	control	15	OK	5.28232	2.17441	-1.28055	-3.09476	0.0035	0.167863
ahnak	NC_007125.6:26461182-26498229	control	15	OK	19.1013	38.597	1.01482	2.66501	0.00645	0.250498
ahr1b	NC_007133.6:12952173-13018308	control	15	OK	4.70078	2.57492	-0.868376	-2.61507	0.00885	0.306026
ahsa1	NC_007131.6:27068009-27075091	control	15	OK	7.29279	4.14153	-0.816306	-2.17472	0.02665	0.553578
ahsg	NC_007133.6:37920958-37927975	control	15	OK	1.40524	0.388544	-1.85467	-2.8019	0.0178	0.451598
aifm2	NC_007124.6:6908863-6926848	control	15	OK	22.1501	57.2278	1.3694	4.40405	5e-05	0.00654421
aifm3	NC_007116.6:12137049-12201148	control	15	OK	1.51315	0.719687	-1.07211	-2.07121	0.024	0.526159
aifm4	NC_007126.6:25503468-25513155	control	15	OK	8.00787	68.8717	3.10442	9.54407	5e-05	0.00654421
aifm5	NC_007132.6:39254747-39291248	control	15	OK	1.29849	0.37997	-1.77288	-3.88199	0.0004	0.0363284
aim1a	NC_007128.6:25463141-25545456	control	15	OK	7.59509	13.1918	0.7965	2.39131	0.0148	0.40833
aim1b	NC_007115.6:847587-888427	control	15	OK	2.26496	4.0413	0.835334	2.64423	0.00635	0.248406
ak2	NC_007130.6:35831562-35841788	control	15	OK	100.694	152.91	0.602699	1.92672	0.0428	0.694068
ak4	NC_007117.6:31365230-31379994	control	15	OK	8.1098	12.9102	0.67077	2.0863	0.0349	0.630333
alas1	NC_007122.6:241308-251810	control	15	OK	40.5927	88.3065	1.1213	3.56255	0.0001	0.0119493
alas2	NC_007119.6:21321854-21336943	control	15	OK	39.7879	75.1427	0.917304	2.93081	0.00365	0.171648
aldh1a2	NC_007118.6:30055068-30096477	control	15	OK	25.6601	14.9796	-0.776532	-2.48851	0.0103	0.326499
aldh3b1	NC_007114.6:33990692-33999452	control	15	OK	7.46644	12.4109	0.733114	2.18323	0.0262	0.548625
aldoab	NC_007123.6:4015414-4033068	control	15	OK	604.477	276.401	-1.12893	-3.07461	0.0028	0.145341
alox12	NC_007118.6:25758539-25776753	control	15	OK	17.7921	27.5837	0.632575	2.07766	0.0388	0.662657
amer3	NC_007113.6:16693669-16711675	control	15	OK	1.34513	0.524171	-1.35963	-2.92543	0.00635	0.248406
ampd1	NC_007119.6:11042865-11074359	control	15	OK	93.4396	33.9898	-1.45893	-2.2198	0.0047	0.202031
amph	NC_007113.6:31907663-31953806	control	15	OK	20.7188	12.811	-0.693554	-2.22148	0.02465	0.53323
and4	NC_007125.6:135967-136391	control	15	OK	101.884	59.9869	-0.764209	-2.01381	0.04815	0.7229
angpt4	NC_007117.6:51932218-52031911	control	15	OK	1.37496	0.671693	-1.03352	-2.08814	0.03295	0.61298
angptl1a	NC_007131.6:16037068-16256889	control	15	OK	5.57038	1.97671	-1.49467	-2.03505	0.04725	0.71692
angptl2a	NC_007116.6:4372666-4403888	control	15	OK	3.33067	1.3238	-1.33113	-2.90526	0.00535	0.220237
ankk1	NC_007126.6:22078222-22097575	control	15	OK	2.33798	4.57512	0.968548	2.28141	0.01685	0.438946
ankrd1b	NC_007123.6:16391933-16403689	control	15	OK	37.96	9.19398	-2.04572	-5.71895	5e-05	0.00654421
ankrd22	NC_007123.6:17032903-17036748	control	15	OK	4.52614	8.41278	0.894303	2.13227	0.0372	0.648297
ankrd24	NC_007133.6:21334174-21368190	control	15	OK	2.05392	0.997763	-1.04161	-2.44897	0.0135	0.389658
ankrd33ba	NC_007135.6:21894243-21917101	control	15	OK	2.42274	1.21101	-1.00043	-2.02961	0.04065	0.678879
antxr2b	NC_007121.6:9361615-9386392	control	15	OK	1.68914	0.650708	-1.3762	-2.35908	0.0204	0.486039
anxa1a	NC_007116.6:24978027-24983087	control	15	OK	161.21	284.837	0.821199	2.46914	0.0123	0.366503
anxa1c	NC_007116.6:64320766-64332809	control	15	OK	87.1972	329.33	1.91718	5.85113	5e-05	0.00654421
anxa2a	NC_007136.6:33527903-33541952	control	15	OK	49.1772	28.72	-0.775934	-2.4403	0.0103	0.326499
anxa2b	NC_007118.6:29247245-29262798	control	15	OK	5.56146	2.67456	-1.05616	-2.39217	0.01855	0.463075
anxa3a	NC_007116.6:38487210-38495699	control	15	OK	22.4401	13.8941	-0.691604	-2.17891	0.02725	0.560225
anxa6	NC_007125.6:50310119-50372993	control	15	OK	22.2089	6.36332	-1.80329	-5.45952	5e-05	0.00654421
apaf1	NC_007115.6:17854729-17885261	control	15	OK	5.79219	10.7152	0.887479	2.8354	0.00445	0.19463
apoba	NC_007128.6:30687112-30711003	control	15	OK	21.9613	46.7581	1.09025	3.0418	0.00325	0.159702
apobb.1	NC_007131.6:31366844-31382016	control	15	OK	152.581	591.898	1.95577	3.07551	0.00685	0.261536
apobec2a	NC_007133.6:603622-613955	control	15	OK	28.142	16.5977	-0.761739	-2.42052	0.01625	0.430198
apoeb	NC_007127.6:24045786-24048560	control	15	OK	887.118	1686.89	0.927169	1.97111	0.04525	0.707421
aqp4	NC_007131.6:18263730-18290764	control	15	OK	4.81632	2.31003	-1.06002	-2.32304	0.01545	0.418028
aqp8a.1	NC_007123.6:20244234-20251184	control	15	OK	9.44243	1.88335	-2.32586	-4.89967	5e-05	0.00654421
aqp8b	NC_007114.6:18422538-18426117	control	15	OK	14.608	4.91752	-1.57075	-3.96158	0.0006	0.0496031
aqp9b	NC_007118.6:30100714-30119038	control	15	OK	1.89037	0.544786	-1.79491	-3.19063	0.00215	0.121411
arg2	NC_007124.6:32894096-32903811	control	15	OK	3.39256	11.7635	1.79387	5.06267	5e-05	0.00654421
arhgap20	NC_007120.6:29717589-29735166	control	15	OK	3.02407	1.73206	-0.804006	-2.27586	0.0186	0.463828
arhgap23b	NC_007123.6:15434566-15518710	control	15	OK	0.671808	0.148241	-2.1801	-3.45303	0.00695	0.264059
arhgef25b	NC_007117.6:39257070-39278415	control	15	OK	5.42169	9.20145	0.763118	2.37461	0.0152	0.414144
arhgef37	NC_007125.6:24543435-24577613	control	15	OK	3.62769	5.80472	0.678175	1.97497	0.0424	0.692392
arl10	NC_007132.6:36896191-36915210	control	15	OK	2.28527	4.5267	0.986095	2.07225	0.03785	0.654574
arl3l1	NC_007132.6:33139025-33153279	control	15	OK	10.8092	3.64095	-1.56987	-3.98805	0.0001	0.0119493
arl3l2	NC_007125.6:891443-898803	control	15	OK	2.20655	0.451461	-2.28912	-3.21442	0.00575	0.232467
arl6ip5b	NC_007134.6:4315133-4320805	control	15	OK	20.7756	37.169	0.839211	2.67963	0.0092	0.312118
arr3a	NC_007121.6:26785753-26849684	control	15	OK	26.57	5.72612	-2.21417	-3.89688	0.0012	0.0822993
arr3b	NC_007125.6:32497789-32509214	control	15	OK	4.77994	0.946268	-2.33667	-4.83737	5e-05	0.00654421
arrdc3b	NC_007121.6:43914682-43924650	control	15	OK	13.7103	25.517	0.896196	2.93239	0.00455	0.197891
asah1b	NC_007112.6:15961316-15972028	control	15	OK	10.4124	19.2166	0.884052	2.75365	0.0074	0.274455
asb10	NC_007135.6:34199758-34221441	control	15	OK	3.21975	0.648729	-2.31126	-4.09959	0.00035	0.0331638
asb14b	NC_007134.6:19562988-19577681	control	15	OK	3.75301	1.55444	-1.27165	-3.04535	0.0037	0.172493
asb15a	NC_007136.6:27380660-27399467	control	15	OK	10.4146	3.92848	-1.40656	-4.01551	0.0001	0.0119493
asb2a.1	NC_007131.6:27398053-27431222	control	15	OK	5.72444	2.20714	-1.37496	-3.70261	0.0001	0.0119493
asic2	NC_007114.6:37682409-38486543	control	15	OK	1.95555	0.788381	-1.31061	-2.85329	0.0041	0.185222
asns	NC_007130.6:26070137-26093769	control	15	OK	10.2808	16.7598	0.70506	2.31247	0.02165	0.499505
aspg	NC_007128.6:45754665-45791356	control	15	OK	4.89529	8.38618	0.77662	2.31149	0.01765	0.450075
asph	NC_007118.6:57877072-57949025	control	15	OK	28.7035	17.6125	-0.704623	-2.12594	0.0257	0.543519
atf3	NC_007131.6:37891798-37897858	control	15	OK	6.62377	21.5921	1.70478	5.38007	5e-05	0.00654421
atf5a	NC_007116.6:29812497-29818701	control	15	OK	9.9194	22.6526	1.19135	3.70235	0.0003	0.0297548
atf5b	NC_007126.6:17924354-17987614	control	15	OK	9.23866	18.7347	1.01995	2.01414	0.0447	0.703212
atic	NC_007112.6:4788047-4805860	control	15	OK	61.2896	100.312	0.710776	2.25301	0.02635	0.550614
atox1	NC_007125.6:25672444-25770609	control	15	OK	76.5957	133.156	0.797781	2.14548	0.03055	0.590777
atp10b	NC_007125.6:21996540-22065709	control	15	OK	0.861415	1.66921	0.954389	2.35699	0.0169	0.439268
atp1a2a	NC_007113.6:44350079-44402539	control	15	OK	25.6216	11.9288	-1.10291	-3.60471	0.00025	0.0256683
atp1a3a	NC_007130.6:6409213-6466510	control	15	OK	46.956	27.0264	-0.796939	-2.46732	0.014	0.397374
atp1b2b	NC_007116.6:37875377-37906847	control	15	OK	9.35927	5.10162	-0.875442	-2.60129	0.00845	0.298383
atp2a1l	NC_007123.6:13206092-13223444	control	15	OK	123.227	37.7217	-1.70786	-5.10904	5e-05	0.00654421
atp2b1b	NC_007136.6:19511753-19568004	control	15	OK	6.60253	2.45113	-1.42957	-4.22342	5e-05	0.00654421
atp2b2	NC_007122.6:1120751-1306113	control	15	OK	5.94204	3.85868	-0.622852	-1.90104	0.04655	0.712008
atp7a	NC_007125.6:22100070-22144910	control	15	OK	4.50899	7.25354	0.685881	2.12529	0.0298	0.583688
atp8a1	NC_007125.6:46116963-46200273	control	15	OK	0.939109	0.231905	-2.01776	-2.68038	0.02185	0.501147
atp8b1	NC_007132.6:3467328-3548986	control	15	OK	9.31065	15.2878	0.715427	2.34624	0.0216	0.499174
atp8b5b	NC_007121.6:17069189-17105560	control	15	OK	1.77704	0.985309	-0.850825	-2.09118	0.0359	0.637865
b2m	NC_007115.6:12794546-12796644	control	15	OK	2.13724	6.85615	1.68165	2.90543	0.0065	0.251742
bach1	NC_007121.6:25407864-25422647	control	15	OK	6.32859	22.8306	1.85102	5.55406	5e-05	0.00654421
bada	NC_007132.6:27151700-27154457	control	15	OK	5.7863	11.9529	1.04664	3.21146	0.0019	0.11087
bahd1	NC_007128.6:31259953-31327419	control	15	OK	2.46878	3.92182	0.667726	1.94014	0.0479	0.720537
bai2	NC_007130.6:39145978-39351584	control	15	OK	2.66982	1.57054	-0.765478	-2.05711	0.03605	0.639394
bbc3	NC_007126.6:23809948-23826371	control	15	OK	0.899502	2.56645	1.51258	3.60476	0.00095	0.0695108
bc2	NC_007123.6:26935953-26939671	control	15	OK	42.5319	64.5968	0.602916	1.9784	0.0469	0.71393
bcl11ba	NC_007128.6:18097192-18160911	control	15	OK	13.5082	7.95658	-0.763616	-2.45095	0.0107	0.334634
bcl2l13	NC_007129.6:20592728-20619292	control	15	OK	13.626	8.76322	-0.636827	-1.98629	0.04155	0.686354
bcl3	NC_007127.6:25786322-25824661	control	15	OK	0.191229	0.619523	1.69585	2.64539	0.0171	0.442823
bcl6ab	NC_007113.6:10289511-10300387	control	15	OK	7.0318	12.4266	0.82146	2.54491	0.01015	0.326244
bean1	NC_007118.6:44145253-44241705	control	15	OK	1.76053	0.627267	-1.48886	-2.54744	0.01635	0.432029
best1	NC_007136.6:2941943-2964255	control	15	OK	0.798142	0.308433	-1.37169	-1.94535	0.03615	0.640433
bfsp1	NC_007124.6:851412-869842	control	15	OK	13.8926	1.69935	-3.03126	-8.98488	5e-05	0.00654421
bfsp2	NC_007113.6:32777911-32786077	control	15	OK	35.9536	10.3989	-1.78971	-5.5675	5e-05	0.00654421
bgna	NC_007119.6:14066790-14088941	control	15	OK	1.31952	0.303734	-2.11914	-3.14356	0.0115	0.351798
bgnb	NC_007134.6:20086260-20125043	control	15	OK	2.8854	1.48548	-0.957844	-2.40982	0.0148	0.40833
bhlhe23	NC_007134.6:17729446-17731005	control	15	OK	21.3319	12.4167	-0.780727	-2.45758	0.01395	0.397082
bida	NC_007129.6:20577726-20583890	control	15	OK	9.17253	16.9379	0.884861	2.333	0.0164	0.432371
bik	NC_007115.6:18854009-18857635	control	15	OK	2.58324	5.54912	1.10308	2.22261	0.0272	0.55969
bin2a	NC_007134.6:33812683-33831156	control	15	OK	6.9144	2.97671	-1.21589	-2.13108	0.03265	0.610438
birc7	NC_007134.6:14461366-14477514	control	15	OK	10.9245	4.0321	-1.43796	-3.62277	0.0001	0.0119493
blvrb,zgc:113340	NC_007129.6:46153521-46170209	control	15	OK	34.0994	91.2396	1.41991	4.53584	5e-05	0.00654421
bmb	NC_007136.6:35742745-35760296	control	15	OK	1.77088	4.74237	1.42115	3.46363	0.0023	0.127013
bnc2	NC_007112.6:26330201-26516627	control	15	OK	7.23321	4.3596	-0.730438	-2.26889	0.0179	0.45315
bnip3la	NC_007119.6:5222081-5241096	control	15	OK	26.3872	41.9514	0.668882	1.94272	0.0447	0.703212
bnip4	NC_007128.6:20211980-20216448	control	15	OK	9.61121	17.6781	0.879177	2.58655	0.01045	0.329761
bnipl	NC_007127.6:38327172-38352130	control	15	OK	9.90726	19.4124	0.970421	2.47977	0.00945	0.31737
bri3	NC_007114.6:61158991-61166348	control	15	OK	20.4662	36.3231	0.827642	2.70842	0.00815	0.29251
btbd17	NC_007123.6:36398338-36409535	control	15	OK	3.11096	1.2407	-1.32621	-2.92786	0.00655	0.252979
btr02	NC_007114.6:49092997-49104578	control	15	OK	3.80111	7.08913	0.899186	2.37954	0.02275	0.511897
bzw1b	NC_007120.6:426552-443847	control	15	OK	58.0697	108.577	0.902866	2.86337	0.0037	0.172493
bzw2	NC_007130.6:31422376-31455317	control	15	OK	22.4401	13.8941	-0.691604	-2.17891	0.02725	0.560225
c13h10orf71	NC_007124.6:30794564-30807823	control	15	OK	2.86994	1.22644	-1.22655	-3.79796	0.0003	0.0297548
c19h1orf216	NC_007130.6:47793687-47798491	control	15	OK	5.42955	2.22179	-1.28911	-2.73411	0.0072	0.269607
c1galt1c1	NC_007125.6:33175415-33180743	control	15	OK	15.3118	26.3393	0.782573	2.23405	0.0208	0.489079
c1ql1	NC_007114.6:31263889-31302487	control	15	OK	3.33464	1.96622	-0.762107	-2.09174	0.0317	0.603679
c1qtnf3	NC_007132.6:19375750-19406977	control	15	OK	3.59417	1.92377	-0.901722	-1.9609	0.04675	0.713042
c1qtnf6a	NC_007114.6:25086206-25097690	control	15	OK	3.05965	1.43539	-1.09192	-2.8246	0.0032	0.158021
c1qtnf9	NC_007135.6:21761604-21768380	control	15	OK	0.745721	0.160429	-2.2167	-2.64285	0.00825	0.294589
c3a.1	NC_007112.6:55460925-55507679	control	15	OK	49.8448	126.412	1.34262	3.78688	0.0003	0.0297548
c3a.2	NC_007112.6:55560355-55651276	control	15	OK	1.08323	2.0594	0.926877	2.38603	0.0148	0.40833
c3a.6	NC_007112.6:55360637-55411312	control	15	OK	1.97333	6.71587	1.76694	5.2665	5e-05	0.00654421
c5	NC_007116.6:62764788-62816237	control	15	OK	13.7032	21.5808	0.655235	2.13853	0.0333	0.616543
c6	NC_007132.6:20864655-20896111	control	15	OK	3.46845	6.20633	0.839452	2.11573	0.0318	0.604105
ca15a	NC_007123.6:4283518-4294458	control	15	OK	7.31362	1.36815	-2.41836	-5.20434	5e-05	0.00654421
ca15c	NC_007123.6:4301639-4309452	control	15	OK	0.84877	3.04379	1.84242	3.49552	0.0018	0.108376
ca16b	NC_007117.6:45950010-46160694	control	15	OK	5.95439	3.78992	-0.651787	-1.92063	0.0455	0.708002
ca2	NC_007135.6:32732133-32750239	control	15	OK	49.1772	28.72	-0.775934	-2.4403	0.0103	0.326499
ca4a	NC_007116.6:1971710-2014156	control	15	OK	5.96778	1.74526	-1.77375	-4.74462	5e-05	0.00654421
cab39l1	NC_007125.6:31136630-31149073	control	15	OK	13.7421	21.0964	0.618399	1.9349	0.04945	0.728363
cables1	NC_007113.6:4461709-4515175	control	15	OK	1.51524	0.82321	-0.880214	-1.88134	0.0491	0.727646
cacna1f	NC_007119.6:22830232-22905985	control	15	OK	1.00405	0.382838	-1.39102	-3.10011	0.0032	0.158021
cacna1sa,kctd20	NC_007133.6:866710-951959	control	15	OK	7.40886	2.66157	-1.47697	-3.29019	0.00055	0.0465129
cacna1sb	NC_007119.6:25748432-25791731	control	15	OK	7.63726	4.02016	-0.925803	-2.93162	0.0023	0.127013
cacna2d4b	NC_007136.6:18925750-18992490	control	15	OK	0.929142	0.160726	-2.5313	-3.71554	0.00345	0.166034
cacnb1	NC_007114.6:16003912-16077877	control	15	OK	13.8279	8.28604	-0.738825	-2.10071	0.0298	0.583688
cacng3b	NC_007114.6:35168848-35246328	control	15	OK	6.23354	3.73169	-0.740222	-2.26257	0.023	0.51504
cacng6b	NC_007127.6:12938835-12984565	control	15	OK	6.70997	2.22803	-1.59054	-3.00945	0.00115	0.0798874
cadpsb	NC_007117.6:41257739-41448029	control	15	OK	12.6641	8.0788	-0.648527	-2.07679	0.03285	0.611933
cahz	NC_007113.6:29493849-29501572	control	15	OK	87.4932	151.321	0.790367	2.48614	0.01175	0.356641
calb1	NC_007127.6:36812045-36844899	control	15	OK	8.15683	4.76843	-0.774496	-2.08517	0.0396	0.669139
calb2a	NC_007129.6:21209695-21229785	control	15	OK	32.1786	17.9681	-0.840659	-2.68479	0.00725	0.270323
calb2b	NC_007118.6:24410120-24428789	control	15	OK	48.0822	19.8881	-1.2736	-4.08761	5e-05	0.00654421
calcr	NC_007130.6:41120141-41238800	control	15	OK	1.09753	0.476355	-1.20415	-2.30401	0.02405	0.526596
cald1a	NC_007136.6:20043271-20114177	control	15	OK	1.20631	0.388678	-1.63395	-2.74903	0.0165	0.433538
camk2a	NC_007132.6:43898481-43957799	control	15	OK	4.11964	1.60182	-1.36281	-2.49599	0.00255	0.136304
camk2b1	NC_007116.6:20427261-20527227	control	15	OK	15.4756	10.0068	-0.629014	-2.01954	0.0349	0.630333
camk2d2	NC_007112.6:13475958-13547613	control	15	OK	34.8353	20.1712	-0.788252	-2.40518	0.0132	0.384006
camk2n2	NC_007135.6:25547822-25550106	control	15	OK	11.1918	6.9611	-0.685058	-1.97733	0.04105	0.680987
camkvb	NC_007122.6:35102438-35176701	control	15	OK	2.8423	1.16699	-1.28427	-2.796	0.0057	0.230979
camkvl	NC_007134.6:20637440-20711279	control	15	OK	1.93815	0.861504	-1.16975	-2.67305	0.0082	0.293703
cand2	NC_007133.6:31096348-31110475	control	15	OK	4.70089	1.66247	-1.4996	-4.08629	0.0001	0.0119493
cap2	NC_007130.6:46567459-46620413	control	15	OK	18.3319	8.07011	-1.1837	-3.60195	0.00025	0.0256683
capn1b	NC_007133.6:26278301-26308100	control	15	OK	5.789	3.52582	-0.715353	-2.03839	0.0376	0.652345
capn3a	NC_007128.6:45191670-45363385	control	15	OK	45.4298	6.14327	-2.88656	-4.33636	5e-05	0.00654421
capn3b	NC_007131.6:26037187-26102339	control	15	OK	20.663	7.4024	-1.48099	-4.49785	5e-05	0.00654421
capn9	NC_007112.6:53222100-53247304	control	15	OK	24.7455	50.5679	1.03106	3.34817	0.00135	0.0893488
capns1b	NC_007126.6:29183237-29189954	control	15	OK	107.342	175.157	0.706427	2.19522	0.0254	0.541097
carm1l	NC_007121.6:5059890-5090295	control	15	OK	0.949202	0.359724	-1.39982	-2.00369	0.044	0.701336
casp3b	NC_007125.6:4018224-4044292	control	15	OK	8.26208	30.0028	1.86052	4.65295	5e-05	0.00654421
casp6	NC_007114.6:32827714-32834150	control	15	OK	7.2038	12.734	0.82185	2.61021	0.00785	0.285252
casp8	NC_007117.6:12810942-12821872	control	15	OK	2.86272	6.00067	1.06773	2.73274	0.00565	0.229617
casp9	NC_007134.6:25047232-25058731	control	15	OK	4.18473	11.3718	1.44226	4.00996	0.0002	0.0215787
casq1a	NC_007113.6:38057528-38072154	control	15	OK	68.4805	30.2517	-1.17868	-3.73216	0.0002	0.0215787
casq1b	NC_007118.6:73495849-73530672	control	15	OK	53.2242	29.6469	-0.844202	-2.73992	0.00525	0.217527
casq2	NC_007120.6:33286546-33296408	control	15	OK	79.4358	46.9902	-0.757431	-2.38172	0.01725	0.44408
casz1	NC_007134.6:29029678-29139006	control	15	OK	6.00619	3.35493	-0.840166	-2.64165	0.0057	0.230979
cbln20	NC_007126.6:611255-615236	control	15	OK	1.83899	0.355927	-2.36926	-3.20728	0.01195	0.359748
cbr1l	NC_007132.6:21596579-21604558	control	15	OK	26.4689	124.962	2.23912	7.11501	5e-05	0.00654421
cbsb	NC_007120.6:9205231-9250904	control	15	OK	17.2268	37.4264	1.1194	3.65424	0.0002	0.0215787
cbx7a	NC_007114.6:24855596-24864069	control	15	OK	1.11014	6.32306	2.50988	5.631	0.0001	0.0119493
cc2d1b	NC_007113.6:19587435-19623745	control	15	OK	2.97282	5.60458	0.914776	2.69604	0.00625	0.245729
ccbe1	NC_007132.6:10485045-10584465	control	15	OK	2.39884	1.05775	-1.18134	-1.88109	0.04875	0.726864
ccdc141	NC_007120.6:43273018-43340857	control	15	OK	2.30238	1.25623	-0.874021	-2.39002	0.01525	0.41486
ccdc152,si:ch211-22d5.2	NC_007132.6:20684850-20706201	control	15	OK	1.90971	0.771485	-1.30764	-2.62877	0.00635	0.248406
ccdc85a	NC_007124.6:26869223-26907965	control	15	OK	2.51811	0.966876	-1.38094	-3.11462	0.00125	0.085062
ccdc88aa	NC_007117.6:6140370-6189381	control	15	OK	5.09055	2.13886	-1.25098	-3.78005	0.00025	0.0256683
ccl25b	NC_007122.6:6264423-6268462	control	15	OK	23.3395	12.2674	-0.927942	-2.59002	0.01195	0.359748
ccl34a.4	NC_007113.6:40326925-40327704	control	15	OK	2.5374	14.8527	2.5493	4.68599	0.0003	0.0297548
ccl34b.1	NC_007135.6:27318196-27320869	control	15	OK	10.1301	2.90182	-1.80361	-3.23561	0.0051	0.213715
ccl35.1	NC_007136.6:12952118-12954428	control	15	OK	0	0.837631	inf	#NAME?	0.0218	0.500821
ccm2l	NC_007134.6:9100486-9146836	control	15	OK	0.940921	0.352175	-1.41778	-2.32346	0.02905	0.578053
cd248a	NC_007118.6:18111922-18115006	control	15	OK	17.6405	7.81148	-1.17522	-3.76648	0.0002	0.0215787
cd248b,rce1b	NC_007132.6:26455425-26483949	control	15	OK	13.6986	7.82757	-0.807396	-2.56656	0.0093	0.314292
cd63	NC_007134.6:32139762-32159408	control	15	OK	105.301	169.044	0.682877	2.17164	0.03005	0.585473
cd9b	NC_007115.6:4226080-4252710	control	15	OK	60.5067	104.797	0.792428	2.58167	0.00895	0.307359
cdc123	NC_007115.6:7867582-7875063	control	15	OK	10.9292	17.8634	0.708817	2.13566	0.02935	0.579086
cdc16,dcun1d2a	NC_007120.6:35110504-35136408	control	15	OK	38.2056	24.1326	-0.6628	-2.06811	0.0307	0.592695
cdc42ep1a	NC_007123.6:19115425-19129051	control	15	OK	3.33106	1.65742	-1.00704	-2.49942	0.0098	0.32461
cdc42ep3	NC_007124.6:41997875-42017598	control	15	OK	14.3658	7.07904	-1.02101	-3.04383	0.0022	0.123537
cdh1	NC_007113.6:28906402-28951609	control	15	OK	4.03635	2.47065	-0.708162	-1.94942	0.0491	0.727646
cdh11	NC_007118.6:43420919-43501849	control	15	OK	32.5079	20.9407	-0.634481	-1.99846	0.0411	0.68117
cdh17	NC_007127.6:26900739-26929356	control	15	OK	7.29367	2.93499	-1.31329	-3.85783	0.0001	0.0119493
cdh7	NC_007113.6:27344598-27440329	control	15	OK	6.041	3.82252	-0.660262	-1.90926	0.04755	0.718804
cdhr1a	NC_007124.6:29350205-29375208	control	15	OK	0.914529	0.350409	-1.38399	-2.51978	0.0138	0.394899
cdk5r2a	NC_007117.6:13613521-13615244	control	15	OK	25.171	16.2921	-0.627587	-2.02264	0.04405	0.701336
cdkn1a	NC_007133.6:564661-570094	control	15	OK	4.2618	12.5883	1.56254	4.54466	5e-05	0.00654421
cds1	NC_007116.6:39394129-39440194	control	15	OK	9.45237	15.2128	0.68654	2.04729	0.0363	0.641392
ceacam1	NC_007127.6:11833300-11869691	control	15	OK	22.5032	9.64728	-1.22193	-3.93744	0.0002	0.0215787
cebpb	NC_007119.6:28414256-28415774	control	15	OK	25.4655	65.5568	1.3642	4.43856	5e-05	0.00654421
cebpg	NC_007118.6:37818445-37823929	control	15	OK	35.9536	10.3989	-1.78971	-5.5675	5e-05	0.00654421
cenpj	NC_007120.6:29761064-29769162	control	15	OK	1.81523	3.14846	0.794495	2.11443	0.0298	0.583688
cenpk	NC_007112.6:30776170-30783778	control	15	OK	8.83221	14.7245	0.737372	2.11736	0.0353	0.633311
cers3	NC_007118.6:9659319-9713357	control	15	OK	1.73062	0.679934	-1.34782	-2.14461	0.0248	0.534823
ces2	NC_007129.6:17419413-17426531	control	15	OK	127.35	212.87	0.74117	2.21919	0.02915	0.578071
cetp	NC_007129.6:17622409-17632755	control	15	OK	6.65698	12.3738	0.89435	2.66154	0.0069	0.262872
cfi	NW_003336537.1:14446-42415	control	15	OK	39.1694	85.0145	1.11798	3.55481	0.0007	0.0554481
cfl2	NC_007128.6:9851026-9869190	control	15	OK	49.6062	19.152	-1.37302	-4.43147	5e-05	0.00654421
chac1	NC_007131.6:28367844-28370374	control	15	OK	124.058	225.247	0.860486	2.58798	0.01115	0.343039
chadlb	NC_007123.6:18867610-18885960	control	15	OK	4.49913	2.04109	-1.14031	-2.94567	0.0052	0.21648
chd3	NC_007118.6:20418915-20518964	control	15	OK	2.79855	1.45668	-0.941998	-2.81201	0.0043	0.19081
chl1a	NC_007134.6:11350715-11516308	control	15	OK	3.71259	6.07144	0.709615	2.19293	0.0248	0.534823
chmp5b	NC_007118.6:58731502-58751831	control	15	OK	42.1953	80.9813	0.940507	2.83669	0.00345	0.166034
chrna2b	NC_007131.6:19894009-19925135	control	15	OK	0.964895	0.413964	-1.22087	-2.31174	0.0283	0.569767
chrna6	NC_007112.6:21791565-21828015	control	15	OK	2.80643	1.54061	-0.86523	-1.97007	0.0478	0.719652
chrna7	NC_007118.6:53371604-53400001	control	15	OK	1.22292	0.439576	-1.47615	-2.33769	0.03355	0.618229
chrne	NC_007116.6:37839945-37851331	control	15	OK	18.2116	8.26496	-1.13978	-3.43465	0.0007	0.0554481
ciapin1	NC_007136.6:14302244-14310326	control	15	OK	25.5595	57.1225	1.1602	3.71454	0.00025	0.0256683
cilp	NC_007118.6:31154863-31170499	control	15	OK	10.7981	3.03859	-1.82931	-3.63592	0.001	0.0721887
cilp2	NC_007133.6:18443915-18462825	control	15	OK	0.790123	0.228446	-1.79022	-3.50841	0.00215	0.121411
cipca	NC_007128.6:44642481-44649645	control	15	OK	2.60935	4.55547	0.803911	2.1161	0.0255	0.541743
ckmt2a	NC_007121.6:3061650-3079501	control	15	OK	26.3602	6.6868	-1.97897	-5.81647	5e-05	0.00654421
ckmt2b	NC_007116.6:50947617-50962170	control	15	OK	106.966	42.6257	-1.32735	-4.25917	5e-05	0.00654421
clcn1	NC_007127.6:17568834-17633880	control	15	OK	2.73735	1.03503	-1.40311	-3.48405	0.00095	0.0695108
clcn1a	NC_007130.6:9692271-9744116	control	15	OK	1.64577	0.642714	-1.35652	-2.84743	0.00505	0.213022
cldn1	NC_007113.6:45313-48488	control	15	OK	48.8305	88.2593	0.853967	2.76025	0.00715	0.268165
cldn15a	NC_007118.6:20559125-20565196	control	15	OK	7.38232	3.70212	-0.995725	-2.41063	0.0197	0.477485
cldn19	NC_007122.6:38737695-38782924	control	15	OK	11.3378	6.00827	-0.916117	-2.4964	0.01215	0.364516
cldn7a	NC_007118.6:22345108-22355696	control	15	OK	9.57393	4.87834	-0.972721	-2.66881	0.01025	0.326244
cldnb	NC_007132.6:25729106-25730235	control	15	OK	66.8909	111.547	0.737773	2.41231	0.0175	0.447717
cldnk	NC_007114.6:49088238-49092921	control	15	OK	3.39027	1.55205	-1.12723	-2.32923	0.01605	0.427489
clic5a	NC_007128.6:5409041-5426245	control	15	OK	6.13789	3.53213	-0.797204	-2.1195	0.03525	0.633063
clic5b	NC_007131.6:44028193-44074318	control	15	OK	9.52978	2.94274	-1.69528	-3.86394	0.0001	0.0119493
clica	NC_007132.6:13566926-13575461	control	15	OK	19.3273	41.5472	1.10411	3.5467	0.0003	0.0297548
clk4a	NC_007125.6:6627196-6637786	control	15	OK	52.2858	28.1062	-0.895532	-2.80275	0.00425	0.189312
clmp	NC_007121.6:40031909-40189501	control	15	OK	4.50791	2.52418	-0.836644	-2.27734	0.02615	0.548234
clstn3	NC_007127.6:12213536-12282735	control	15	OK	13.9791	8.42796	-0.730012	-2.34803	0.0148	0.40833
clvs2	NC_007131.6:40370676-40423207	control	15	OK	8.81956	5.66072	-0.63972	-1.93746	0.04655	0.712008
cmya5	NC_007116.6:51201911-51237383	control	15	OK	3.67067	1.77563	-1.04771	-3.11148	0.0019	0.11087
cnga3a	NC_007117.6:38796396-38821512	control	15	OK	1.21096	0.215938	-2.48746	-4.43029	0.0001	0.0119493
cnksr2a	NC_007135.6:25364945-25528965	control	15	OK	1.34659	0.682185	-0.98108	-2.15859	0.02395	0.525886
cnpy2	NC_007122.6:2471089-2479705	control	15	OK	11.5764	5.64849	-1.03524	-2.50227	0.0119	0.359015
cnrip1b	NC_007124.6:959534-968210	control	15	OK	7.97928	3.79649	-1.07159	-2.80045	0.00445	0.19463
cntn1b	NC_007115.6:13734988-13757862	control	15	OK	3.73702	1.95155	-0.937268	-2.70933	0.0078	0.284025
coch	NC_007128.6:28726312-28732650	control	15	OK	0.846223	0.31528	-1.42441	-2.21532	0.03	0.58515
col10a1a	NC_007128.6:15534149-15538918	control	15	OK	65.3822	21.9125	-1.57715	-5.06438	5e-05	0.00654421
col11a1b	NC_007113.6:15720539-15894576	control	15	OK	28.6617	18.3045	-0.64693	-1.9548	0.04145	0.684864
col11a2	NC_007130.6:7254945-7306456	control	15	OK	45.5853	18.6937	-1.28601	-3.65728	0.0004	0.0363284
col18a1	NC_007117.6:18618379-18682367	control	15	OK	2.55946	1.22048	-1.06839	-2.76611	0.0069	0.262872
col27a1a	NC_007127.6:51876706-52012649	control	15	OK	9.13555	3.87439	-1.23752	-3.81172	0.00015	0.0170511
col27a1a	NW_008805444.1:5527-7126	control	15	OK	9.72453	2.74317	-1.82578	-4.62979	5e-05	0.00654421
col27a1b	NC_007116.6:64489831-64637179	control	15	OK	2.08746	1.21971	-0.77521	-2.10759	0.02935	0.579086
col28a1a	NC_007120.6:48600024-48673211	control	15	OK	2.81138	5.04445	0.843418	2.53571	0.0092	0.312118
col2a1a	NC_007119.6:21163256-21187389	control	15	OK	346.518	138.946	-1.31841	-2.87028	0.00435	0.191934
col5a2b	NC_007117.6:11203452-11260611	control	15	OK	1.49022	0.458374	-1.70093	-3.7787	0.00045	0.0399878
col6a1	NC_007122.6:33733728-33809701	control	15	OK	33.38	20.3835	-0.711583	-2.19994	0.0268	0.555376
col6a2	NC_007122.6:33660083-33697534	control	15	OK	28.0776	14.5133	-0.952051	-3.05681	0.00295	0.15045
col6a3	NC_007120.6:24103256-24183626	control	15	OK	5.9235	3.57077	-0.730215	-2.36508	0.0147	0.40782
col7a1	NC_007117.6:40187361-40314626	control	15	OK	5.76544	13.406	1.21738	3.83565	0.0001	0.0119493
col7a1l,si:dkey-117n7.5	NC_007115.6:15870583-15976155	control	15	OK	5.50468	9.16082	0.734818	2.24319	0.02035	0.485509
col8a1a	NC_007120.6:30279900-30292806	control	15	OK	16.8936	5.70019	-1.5674	-4.76448	5e-05	0.00654421
col8a1b	NC_007133.6:28697008-28718360	control	15	OK	0.749014	0.307532	-1.28426	-2.16173	0.0323	0.608322
col8a2	NC_007130.6:35906574-36009331	control	15	OK	11.1382	4.49618	-1.30874	-4.14899	5e-05	0.00654421
col9a1a	NC_007122.6:11291868-11317662	control	15	OK	91.38	35.6659	-1.35733	-4.33776	5e-05	0.00654421
col9a2	NC_007130.6:38834938-38880434	control	15	OK	147.452	82.4718	-0.838269	-2.44438	0.0172	0.443771
col9a3	NC_007134.6:482717-512018	control	15	OK	120.564	68.0613	-0.824887	-2.46522	0.0148	0.40833
colgalt2	NC_007119.6:19331585-19364823	control	15	OK	8.9614	5.62693	-0.671377	-1.96269	0.0472	0.716783
colq	NC_007127.6:20393025-20430420	control	15	OK	1.60884	0.842886	-0.932608	-1.98124	0.0478	0.719652
coro2bb	NC_007136.6:1139533-1155005	control	15	OK	0.967367	0.311608	-1.63433	-2.0862	0.02435	0.530345
cox6b1	NC_007135.6:39718203-39722731	control	15	OK	109.018	65.9817	-0.724429	-2.3568	0.0195	0.475104
cox8b	NC_007136.6:10402838-10406237	control	15	OK	14.4008	7.67009	-0.908839	-2.11073	0.03865	0.661385
cp	NC_007133.6:38220826-38246610	control	15	OK	36.8787	58.2171	0.658657	2.07987	0.03725	0.648684
cpb1	NC_007135.6:4723601-4733941	control	15	OK	1.59862	0.5668	-1.49592	-2.53593	0.0168	0.438296
cpb2	NC_007112.6:28955746-28959805	control	15	OK	11.1903	6.21066	-0.84943	-2.31896	0.02235	0.507957
cplx3b	NC_007129.6:5803480-5822435	control	15	OK	5.71086	3.05605	-0.902042	-2.04482	0.03605	0.639394
cplx4a	NC_007132.6:10647409-10657920	control	15	OK	3.73988	0.637107	-2.55338	-5.62924	5e-05	0.00654421
cpm	NC_007115.6:24019678-24038262	control	15	OK	7.81399	12.1751	0.639808	1.95213	0.04665	0.712759
cpne4	NC_007127.6:41395444-41515510	control	15	OK	4.58322	2.61808	-0.80785	-2.15159	0.02815	0.568382
cps1	NC_007120.6:39217327-39327674	control	15	OK	0.880934	0.303793	-1.53594	-3.09012	0.00505	0.213022
cpt2	NC_007119.6:21105369-21110514	control	15	OK	10.982	6.64194	-0.725471	-2.26057	0.02465	0.53323
cpvl	NC_007127.6:20690998-20709101	control	15	OK	18.5253	30.737	0.730477	2.36335	0.0198	0.478748
crb1	NC_007133.6:23463669-23518780	control	15	OK	2.87842	1.68508	-0.77246	-2.14093	0.0277	0.564176
crebrf	NC_007132.6:41156585-41191184	control	15	OK	1.42074	3.11655	1.13331	3.14234	0.002	0.115075
crfb17	NC_007112.6:53182600-53203565	control	15	OK	2.95081	5.88201	0.995199	2.54307	0.01605	0.427489
crfb4	NC_007120.6:15996672-16125681	control	15	OK	1.51071	3.42444	1.18064	2.6189	0.00855	0.300701
crispld1a	NC_007135.6:14709380-14741599	control	15	OK	1.60902	0.466088	-1.78751	-3.24312	0.0037	0.172493
crmp1	NC_007112.6:13656628-13680626	control	15	OK	14.6165	6.86249	-1.09079	-3.16519	0.00115	0.0798874
crp4	NC_007135.6:38210365-38221083	control	15	OK	28.0016	43.3909	0.631881	2.06004	0.0354	0.633806
crtac1a	NC_007112.6:54256897-54269961	control	15	OK	1.62734	3.58088	1.1378	2.55935	0.00905	0.308524
crx	NC_007116.6:36332587-36336290	control	15	OK	70.9927	37.2709	-0.929622	-2.97373	0.0034	0.164874
cry1a	NC_007115.6:12014192-12027688	control	15	OK	11.6154	27.7386	1.25586	4.08837	5e-05	0.00654421
cry1b	NC_007129.6:15138005-15161184	control	15	OK	3.98049	6.60116	0.729775	2.16823	0.02905	0.578053
cry3	NC_007136.6:13749475-13774893	control	15	OK	9.60142	15.7891	0.717613	2.20487	0.0253	0.540116
cry5	NC_007121.6:39338474-39362391	control	15	OK	1.10173	8.45719	2.94041	4.43414	0.0002	0.0215787
cryaa	NC_007112.6:28293074-28297086	control	15	OK	8.31556	1.58971	-2.38705	-5.32634	5e-05	0.00654421
cryba1a	NC_007126.6:28153817-28161473	control	15	OK	1.34145	0.39671	-1.75764	-2.13111	0.0336	0.618825
cryba1b	NC_007132.6:39140708-39149628	control	15	OK	403.946	85.1152	-2.24667	-6.87501	5e-05	0.00654421
cryba1l1	NC_007125.6:47316808-47333043	control	15	OK	433.718	163.526	-1.40723	-2.4205	0.01885	0.465914
cryba1l2	NC_007112.6:43720616-43733397	control	15	OK	3.81575	1.83303	-1.05774	-2.39125	0.01875	0.465006
cryba2a	NC_007117.6:13650772-13654197	control	15	OK	223.11	61.1277	-1.86786	-5.94084	5e-05	0.00654421
cryba4	NC_007121.6:44195372-44204669	control	15	OK	572.686	146.566	-1.9662	-5.97955	5e-05	0.00654421
crybb1	NC_007121.6:44174426-44180594	control	15	OK	639.932	120.116	-2.41349	-7.19579	5e-05	0.00654421
crybb1l1	NC_007125.6:47316808-47333043	control	15	OK	302.117	61.2576	-2.30215	-4.63931	5e-05	0.00654421
crybb1l2	NC_007112.6:43738357-43745614	control	15	OK	389.014	151.865	-1.35703	-4.04121	0.0002	0.0215787
crybb1l3	NC_007126.6:28163275-28171527	control	15	OK	1.7277	0.697692	-1.30819	-2.13059	0.04525	0.707421
cry-dash	NC_007135.6:20049601-20063928	control	15	OK	4.6172	10.9719	1.24873	3.57671	0.00065	0.0528629
crygm2d10	NC_007120.6:22499108-22499938	control	15	OK	541.907	186.731	-1.53708	-4.82153	5e-05	0.00654421
crygm2d12	NC_007120.6:22393909-22394698	control	15	OK	206.59	50.7873	-2.02423	-6.47608	5e-05	0.00654421
crygm2d20	NC_007120.6:22401480-22402367	control	15	OK	312.321	79.8147	-1.9683	-6.31333	5e-05	0.00654421
crygm2d21	NC_007120.6:22487376-22488543	control	15	OK	191.688	69.0991	-1.47202	-4.71934	5e-05	0.00654421
crygm2d3	NC_007120.6:22469851-22470581	control	15	OK	374.487	91.0905	-2.03954	-6.54262	5e-05	0.00654421
crygm2d4	NC_007120.6:22433769-22434582	control	15	OK	192.756	73.4831	-1.39129	-4.51621	5e-05	0.00654421
crygm2d5,crygm2d9	NC_007120.6:22421123-22429183	control	15	OK	375.181	132.299	-1.50379	-4.56422	5e-05	0.00654421
crygm2d7	NC_007120.6:22460416-22461192	control	15	OK	402.54	212.643	-0.920695	-2.93859	0.00365	0.171648
crygm2d8	NC_007120.6:22280286-22377137	control	15	OK	457.713	126.446	-1.85593	-1.97871	0.04585	0.709986
crygm2f,crygm5	NC_007120.6:22533723-22541402	control	15	OK	8.54693	1.0321	-3.04982	-5.22162	5e-05	0.00654421
crygmx	NC_007123.6:30723264-30726741	control	15	OK	56.1858	21.1889	-1.4069	-4.35128	5e-05	0.00654421
crygmxl2	NC_007123.6:30727774-30731153	control	15	OK	285.42	72.9136	-1.96883	-6.24987	5e-05	0.00654421
crygn1	NC_007113.6:52203678-52222567	control	15	OK	0.982913	0.154695	-2.66763	-2.01652	0.04935	0.728363
crygn2	NC_007135.6:41441059-41448990	control	15	OK	279.978	61.2888	-2.19162	-6.91854	5e-05	0.00654421
csf3	NC_007123.6:10593232-10600842	control	15	OK	0.748854	2.90843	1.95748	3.49293	0.00035	0.0331638
csgalnact1	NC_007121.6:8338229-8431027	control	15	OK	5.17763	2.23863	-1.20968	-3.56564	0.00055	0.0465129
cspg4	NC_007136.6:6377462-6501916	control	15	OK	2.93414	1.61974	-0.857179	-2.64093	0.00905	0.308524
cspg5a	NC_007127.6:42406561-42486691	control	15	OK	93.807	59.633	-0.653584	-1.97382	0.04795	0.72098
cspg5b	NC_007130.6:19703044-19766399	control	15	OK	19.1656	11.4619	-0.741671	-2.276	0.0201	0.483664
csrp1b	NC_007117.6:54828451-54835809	control	15	OK	0.931995	0	#NAME?	#NAME?	5e-05	0.00654421
csrp3	NC_007118.6:16296248-16310316	control	15	OK	1.96216	3.9185	0.997861	2.13012	0.0315	0.601507
cst14b.1	NC_007116.6:4081460-4092016	control	15	OK	84.1032	200.816	1.25564	3.79958	0.0001	0.0119493
cst3	NC_007124.6:33572327-33574368	control	15	OK	81.2467	128.282	0.658935	2.11722	0.03335	0.616816
ctbp2l	NC_007123.6:48689820-48691005	control	15	OK	2.1121	0.720243	-1.55212	-2.53641	0.02195	0.502782
ctbs	NC_007122.6:15935795-15958566	control	15	OK	6.88309	12.2719	0.834227	2.38012	0.01405	0.398309
ctgfb	NC_007130.6:13939298-13946531	control	15	OK	2.78863	0.596755	-2.22435	-4.50808	0.00035	0.0331638
cthrc1a	NC_007130.6:12995969-13007561	control	15	OK	24.9659	15.9271	-0.648471	-2.03732	0.04285	0.694235
ctnnd2a	NC_007135.6:21977097-22556552	control	15	OK	3.58978	2.24265	-0.678689	-2.02339	0.04275	0.694068
ctsa	NC_007117.6:55386993-55411812	control	15	OK	34.0915	73.1921	1.10228	2.69395	0.00585	0.235287
ctsba	NC_007128.6:32670391-32704227	control	15	OK	76.2998	164.827	1.1112	3.20915	0.0012	0.0822993
ctsc	NC_007126.6:43682907-43704472	control	15	OK	8.48044	14.9294	0.815943	2.5995	0.00695	0.264059
ctsd	NC_007129.6:16144538-16157015	control	15	OK	140.85	440.173	1.64392	4.55461	5e-05	0.00654421
ctsh	NC_007129.6:26437678-26444007	control	15	OK	8.12611	14.2711	0.812459	2.34713	0.01875	0.465006
ctsl.1	NC_007128.6:27439840-27444267	control	15	OK	2.21509	4.21086	0.926746	2.00934	0.04495	0.705093
ctsl1b	NC_007123.6:16495259-16497883	control	15	OK	1.08901	12.2119	3.4872	7.12449	5e-05	0.00654421
ctsla	NC_007116.6:44204646-44210762	control	15	OK	36.0272	20.6283	-0.804463	-2.5653	0.00875	0.304675
ctsll	NC_007116.6:23801802-23805867	control	15	OK	2.64734	5.08332	0.941225	2.18072	0.02965	0.582216
ctssb.1	NC_007127.6:29574503-29578811	control	15	OK	4.22613	11.349	1.42516	3.64095	0.0008	0.0609558
cuedc1a	NC_007121.6:37193540-37223693	control	15	OK	11.1433	7.06146	-0.658132	-1.97137	0.04475	0.703212
cx28.6	NC_007128.6:14699557-14706466	control	15	OK	0.738113	1.9441	1.39719	2.22949	0.02045	0.486734
cx28.9	NC_007131.6:40847643-40853838	control	15	OK	1.4274	0.237658	-2.58643	-3.22146	0.0037	0.172493
cx32.2	NC_007131.6:40825576-40832254	control	15	OK	0.946735	2.69004	1.5066	2.89584	0.00535	0.220237
cx32.3	NC_007131.6:40856407-40858471	control	15	OK	1.97593	0.551301	-1.84162	-2.89697	0.0131	0.382687
cxcl18b	NC_007112.6:48578148-48581339	control	15	OK	3.08588	12.2322	1.98693	3.82384	0.0016	0.0998545
cxcr4a	NC_007117.6:12687258-12688869	control	15	OK	3.47863	9.32241	1.42219	3.6875	0.00035	0.0331638
cyb561a3b	NC_007132.6:16006987-16026315	control	15	OK	1.2898	5.94549	2.20465	4.94401	5e-05	0.00654421
cyp11c1	NC_007127.6:54639246-54653913	control	15	OK	2.35122	0.587536	-2.00066	-3.32551	0.00175	0.106095
cyp1c1	NW_003336436.1:103569-106641	control	15	OK	3.54266	1.00977	-1.81081	-4.32949	5e-05	0.00654421
cyp1c2	NC_007128.6:794441-796630	control	15	OK	2.48147	0.544	-2.18952	-4.11883	0.00055	0.0465129
cyp24a1	NC_007117.6:55869079-55881493	control	15	OK	1.2334	5.58425	2.17873	5.05105	5e-05	0.00654421
cyp26a1	NC_007123.6:8916917-8920512	control	15	OK	6.7649	19.9445	1.55985	4.72527	5e-05	0.00654421
cyp27a1.4	NC_007120.6:38636374-38647618	control	15	OK	0.239127	0.608297	1.347	1.47547	0.04355	0.699427
cyp2x9	NC_007136.6:17300335-17307177	control	15	OK	0.758476	0.070541	-3.42657	-2.64317	0.0444	0.701336
cyp2y3	NC_007126.6:97271-104345	control	15	OK	34.7519	58.9961	0.763526	2.40435	0.0161	0.428007
cyp4v8	NC_007112.6:17207392-17219708	control	15	OK	3.10101	1.7346	-0.838133	-2.02626	0.0464	0.711578
cyp51	NC_007130.6:598804-617395	control	15	OK	7.9837	12.3825	0.633173	2.00102	0.0429	0.694563
cyp8b1	NC_007113.6:3588790-3612518	control	15	OK	2.15215	0.376616	-2.51462	-4.02329	0.0019	0.11087
daam2	NC_007128.6:48734049-48811865	control	15	OK	1.49411	0.606209	-1.3014	-2.97399	0.00325	0.159702
dab2	NC_007116.6:31723621-31738735	control	15	OK	9.77789	4.671	-1.06579	-3.1371	0.00155	0.097868
dao.1	NC_007116.6:19684076-19691577	control	15	OK	23.9843	2.65869	-3.1733	-8.36061	5e-05	0.00654421
dapk2b	NC_007125.6:44566633-44730870	control	15	OK	2.78519	4.9268	0.822872	2.05491	0.03925	0.665473
dbnla	NC_007121.6:42529927-42544451	control	15	OK	11.4045	19.1396	0.746961	2.35159	0.0171	0.442823
dbpa	NC_007130.6:10256007-10277440	control	15	OK	5.02169	3.16175	-0.66745	-1.877	0.04635	0.711578
dbx1a	NC_007118.6:16772628-16776035	control	15	OK	11.0605	18.5122	0.743054	2.26921	0.02375	0.522806
dcbld1	NC_007131.6:42399159-42481783	control	15	OK	2.95824	4.85868	0.715827	2.22446	0.02605	0.546956
dcps	NC_007121.6:39362497-39372152	control	15	OK	7.7075	12.18	0.660175	1.97828	0.04405	0.701336
ddc	NC_007127.6:8384812-8429020	control	15	OK	1.16664	0.543724	-1.10141	-2.34024	0.024	0.526159
ddr2	NC_007113.6:7088679-7125303	control	15	OK	3.95903	1.01496	-1.96373	-4.72351	5e-05	0.00654421
ddx21	NC_007124.6:189373-199748	control	15	OK	44.6761	80.4309	0.848246	2.69433	0.00735	0.273179
ddx3	NC_007120.6:33523709-33544165	control	15	OK	26.867	41.7573	0.636193	1.95982	0.049	0.727646
ddx4	NC_007121.6:6925410-6946888	control	15	OK	0.303863	0.7569	1.31668	2.0978	0.0264	0.551001
ddx43	NC_007124.6:27202210-27223623	control	15	OK	1.88328	3.53506	0.908492	2.13305	0.03205	0.606551
desi1b	NC_007123.6:18772113-18776618	control	15	OK	6.98635	19.5567	1.48505	4.19357	5e-05	0.00654421
dhrs12	NC_007120.6:23997740-24001767	control	15	OK	9.32172	18.6259	0.998645	3.05764	0.00365	0.171648
dhrs13l1	NC_007125.6:4044399-4054787	control	15	OK	7.77761	83.0441	3.41648	10.289	5e-05	0.00654421
dhrs3b	NC_007122.6:28343558-28367434	control	15	OK	8.89485	15.6248	0.812799	2.47175	0.0148	0.40833
dhrs7cb	NC_007123.6:449610-458268	control	15	OK	52.3441	30.1497	-0.795881	-2.60135	0.00885	0.306026
dhx34	NC_007129.6:44573736-44596638	control	15	OK	1.10464	1.98865	0.848205	2.03189	0.03665	0.644001
diabloa	NC_007126.6:14918872-14922167	control	15	OK	9.53358	16.0404	0.750625	2.1661	0.0269	0.556132
diablob	NC_007132.6:21486445-21491341	control	15	OK	17.4306	30.4323	0.803981	2.51231	0.0125	0.371357
diaph3	NC_007122.6:31417526-31893451	control	15	OK	3.66699	1.52094	-1.26963	-2.64944	0.0032	0.158021
dkk2	NC_007112.6:49748081-49794421	control	15	OK	1.85014	0.754275	-1.29447	-2.41007	0.0185	0.462322
dmc1,gspt1	NC_007123.6:19234808-19262071	control	15	OK	16.6312	10.1539	-0.71186	-2.28201	0.0206	0.488312
dna2	NC_007124.6:22691213-22709310	control	15	OK	2.60278	4.45313	0.774765	2.3335	0.01945	0.474216
dnaja	NC_007136.6:33833683-33843052	control	15	OK	14.8236	22.7907	0.62055	2.01025	0.0436	0.699749
dnajb2	NC_007120.6:7643477-7676919	control	15	OK	5.18834	8.82727	0.766695	2.05652	0.03535	0.633806
dnase1l3l	NC_007119.6:25332843-25338120	control	15	OK	5.51639	1.91875	-1.52356	-3.16084	0.00435	0.191934
dock5	NC_007119.6:6606863-6782150	control	15	OK	1.40862	2.357	0.742668	2.06184	0.0366	0.643445
dpp6a	NC_007135.6:6649267-7119635	control	15	OK	3.79442	2.16376	-0.810336	-2.26441	0.01685	0.438946
dpp6b	NC_007113.6:12723925-13021361	control	15	OK	3.67747	2.24634	-0.711138	-1.97854	0.04245	0.692723
dpydb	NC_007113.6:20167149-20462256	control	15	OK	7.75303	4.76588	-0.702017	-2.16759	0.0266	0.553361
dpys	NC_007127.6:44333823-44360764	control	15	OK	1.39549	0.361943	-1.94694	-3.50009	0.00335	0.163127
dpysl2	NC_007119.6:5256303-5327246	control	15	OK	14.4099	8.04075	-0.841661	-2.47869	0.01095	0.340325
dpysl4	NC_007123.6:41086163-41124496	control	15	OK	22.0592	14.0786	-0.647876	-2.01411	0.0382	0.657432
dpysl5a	NC_007128.6:36952016-36989064	control	15	OK	31.9198	19.5998	-0.703609	-2.30626	0.02135	0.49651
dpysl5b	NC_007115.6:785251-802404	control	15	OK	14.0693	9.1539	-0.620091	-2.01279	0.0438	0.701336
drd4a	NC_007136.6:4579588-4606694	control	15	OK	0.808458	0.217659	-1.8931	-3.09118	0.0048	0.20482
drd4-rs	NC_007115.6:19961173-20038595	control	15	OK	2.02669	0.878352	-1.20626	-2.3669	0.02075	0.489079
dsc2l	NC_007131.6:7272958-7303957	control	15	OK	9.29253	16.0426	0.787763	2.55447	0.00835	0.296197
dsg2.1	NC_007131.6:7337736-7361520	control	15	OK	11.5244	25.9718	1.17225	3.79554	5e-05	0.00654421
dspa	NC_007113.6:1767569-1819938	control	15	OK	10.0013	22.9126	1.19596	3.75668	0.00025	0.0256683
dtna	NC_007135.6:35821346-35897310	control	15	OK	6.96955	4.33652	-0.684529	-1.84066	0.04835	0.724505
dtnba	NC_007131.6:47412294-47470477	control	15	OK	30.5085	18.69	-0.706943	-2.30544	0.01665	0.43617
dusp3b	NC_007114.6:34553638-34558706	control	15	OK	0.697158	0	#NAME?	#NAME?	0.00415	0.186041
dusp5	NC_007133.6:29962130-29973677	control	15	OK	5.06295	12.5238	1.30662	3.64539	0.00055	0.0465129
ebp	NC_007134.6:19221716-19226929	control	15	OK	3.93151	6.90745	0.813071	2.03716	0.04755	0.718804
ecel1	NC_007126.6:47576590-47633521	control	15	OK	2.2647	1.15846	-0.967119	-2.14326	0.035	0.631163
ef1	NC_007125.6:40378578-40483100	control	15	OK	8.31136	13.5674	0.706988	2.23647	0.0235	0.519918
efemp2a	NC_007125.6:30329352-30363805	control	15	OK	10.8447	6.45735	-0.747976	-2.14617	0.0264	0.551001
egflam	NC_007116.6:7410377-7473352	control	15	OK	1.8417	0.747583	-1.30073	-2.32962	0.01975	0.478035
egln1b	NC_007122.6:31295049-31340446	control	15	OK	18.1971	10.4405	-0.801517	-2.52994	0.01035	0.327343
egln2	NC_007126.6:8359663-8413064	control	15	OK	3.79822	1.18676	-1.6783	-4.86445	5e-05	0.00654421
ehd1a	NC_007125.6:46447387-46477266	control	15	OK	17.7652	27.6581	0.638649	2.08372	0.03435	0.625889
elfn1	NC_007114.6:46053277-46255630	control	15	OK	2.42328	1.33984	-0.854902	-2.32895	0.01725	0.44408
elna	NC_007126.6:353747-413650	control	15	OK	0.876355	0.305816	-1.51885	-3.03844	0.00025	0.0256683
elovl1a	NC_007113.6:19503567-19566050	control	15	OK	11.1114	20.0164	0.849141	2.61265	0.0085	0.299545
elovl4b	NC_007134.6:40517863-40545677	control	15	OK	15.0266	5.16326	-1.54116	-4.69158	5e-05	0.00654421
emid1	NC_007116.6:24378590-24509146	control	15	OK	18.5715	10.365	-0.841366	-2.60072	0.009	0.308019
emilin1a	NC_007131.6:34942779-34962968	control	15	OK	10.7916	5.87422	-0.877436	-2.76073	0.0055	0.224826
emilin3	NC_007134.6:4147610-4176042	control	15	OK	5.1748	2.17258	-1.25209	-3.64483	0.00035	0.0331638
enah	NC_007131.6:36517067-36714434	control	15	OK	12.054	7.39007	-0.705855	-2.26207	0.02125	0.495666
enpp1	NC_007131.6:13507238-13625034	control	15	OK	9.81113	6.20703	-0.660516	-2.05908	0.0356	0.634951
entpd5a	NC_007128.6:44916645-44926777	control	15	OK	2.42708	0.510215	-2.25005	-4.72849	0.00015	0.0170511
eomesa	NC_007130.6:861013-869697	control	15	OK	7.58276	4.67241	-0.698555	-2.04093	0.0376	0.652345
epb41b	NC_007127.6:26573847-26614837	control	15	OK	4.70822	8.96507	0.929132	2.94725	0.0027	0.141514
epb41l3a	NC_007135.6:42055973-42102857	control	15	OK	11.6673	7.4341	-0.650241	-2.05745	0.03225	0.608035
epb41l4b	NC_007127.6:26727274-26770368	control	15	OK	3.23264	5.3155	0.717492	2.03702	0.0392	0.665473
epd	NC_007116.6:37237091-37239157	control	15	OK	20.1072	2.24528	-3.16274	-6.88049	5e-05	0.00654421
epdl1	NC_007118.6:890758-902359	control	15	OK	19.9555	33.7026	0.756071	2.4758	0.0145	0.406296
epdl2	NC_007132.6:28476363-28487999	control	15	OK	32.0168	64.961	1.02075	3.31432	0.0013	0.0873607
epha2a	NC_007117.6:45872712-45903818	control	15	OK	5.73267	12.0075	1.06666	3.39973	0.00065	0.0528629
epha8	NC_007122.6:38449168-38609360	control	15	OK	1.78646	0.687412	-1.37785	-3.08256	0.00305	0.154537
epo	NC_007118.6:21623857-21652539	control	15	OK	0.49909	1.47576	1.56409	1.90781	0.0369	0.645546
eppk1	NC_007130.6:22778959-22802804	control	15	OK	0.655176	1.35938	1.05299	3.14349	0.00175	0.106095
eprs	NC_007128.6:39750035-39792409	control	15	OK	24.0834	39.4663	0.71258	2.22441	0.0255	0.541743
eps8l1	NC_007114.6:16363418-16387842	control	15	OK	7.42603	12.794	0.78481	2.38103	0.0147	0.40782
erbb3a	NC_007117.6:7308901-7374882	control	15	OK	7.10892	11.8897	0.742014	2.33455	0.01495	0.411172
erich3	NC_007119.6:17897761-17919819	control	15	OK	0.731897	0.289437	-1.33839	-2.17054	0.0286	0.573663
esamb	NC_007126.6:19417960-19508259	control	15	OK	1.42896	0.524859	-1.44497	-2.72779	0.0084	0.297669
esm1	NC_007132.6:9894579-9898869	control	15	OK	2.20957	6.91361	1.64567	3.79746	0.0003	0.0297548
esrp1	NC_007127.6:26772218-26803290	control	15	OK	15.7567	23.9697	0.605248	1.96369	0.04465	0.702906
esrp2	NC_007118.6:34523307-34550359	control	15	OK	10.8877	17.108	0.651975	2.07124	0.0326	0.609872
esrrb	NC_007128.6:52213715-52270330	control	15	OK	4.40833	1.8699	-1.23727	-1.88798	0.0496	0.729192
esrrga	NC_007128.6:29777838-30035164	control	15	OK	16.16	9.08382	-0.831057	-1.97626	0.03645	0.642583
ethe1	NC_007127.6:54443598-54462194	control	15	OK	11.0263	51.0451	2.21083	6.78284	5e-05	0.00654421
etnppl	NC_007118.6:59773931-59787077	control	15	OK	10.7296	3.08108	-1.80009	-4.79298	5e-05	0.00654421
ets2	NC_007121.6:187808-196598	control	15	OK	10.8811	20.6655	0.925399	2.9568	0.00365	0.171648
evpla	NC_007117.6:17959278-17983457	control	15	OK	13.583	30.9076	1.18616	3.74007	0.0002	0.0215787
evplb	NW_003334245.1:57263-76191	control	15	OK	21.7126	37.4411	0.786086	2.47119	0.01065	0.333965
exoc3l2b	NC_007126.6:20200791-20264285	control	15	OK	2.26026	1.31483	-0.781615	-2.04989	0.03655	0.643212
eya4	NC_007134.6:31513128-31586066	control	15	OK	14.7755	9.11613	-0.696717	-2.19013	0.02555	0.542148
ezra	NC_007128.6:45430381-45466898	control	15	OK	6.19259	3.71628	-0.736682	-2.187	0.0286	0.573663
f11r	NC_007116.6:29231252-29248433	control	15	OK	45.0937	76.8302	0.768749	2.51656	0.01315	0.383348
f2rl3,lect2l	NC_007125.6:36528984-36553970	control	15	OK	29.541	55.2485	0.903218	2.6106	0.00945	0.31737
f3a	NC_007135.6:31340123-31355709	control	15	OK	7.40729	11.9382	0.688564	1.94373	0.04205	0.689894
f7i	NC_007112.6:127257-134079	control	15	OK	1.27407	0.171503	-2.89313	-3.68732	0.01465	0.407563
fabp10a	NC_007127.6:52626281-52631180	control	15	OK	17.7345	4.20124	-2.07767	-3.94354	0.0009	0.0667592
fabp2	NC_007112.6:25157401-25160701	control	15	OK	119.246	182.265	0.612104	1.95586	0.0433	0.697813
fads2	NC_007136.6:4007829-4023060	control	15	OK	2.49326	5.45082	1.12844	2.73859	0.00845	0.298383
fah	NC_007118.6:10424672-10447782	control	15	OK	11.9394	30.6568	1.36047	4.36539	5e-05	0.00654421
fam101b	NC_007126.6:25160766-25164463	control	15	OK	3.74525	1.46839	-1.35082	-3.24593	0.00245	0.132068
fam180a	NC_007115.6:1000207-1013857	control	15	OK	1.71027	0.760725	-1.16877	-2.05093	0.04985	0.731759
fam184b	NC_007112.6:22798380-22867317	control	15	OK	7.58982	4.13512	-0.876136	-2.23303	0.024	0.526159
fam196ab	NC_007128.6:31962604-32055368	control	15	OK	0.715147	0.228635	-1.64519	-2.33807	0.0347	0.629155
fam210b	NC_007117.6:59355009-59361827	control	15	OK	7.98264	16.5074	1.04818	3.05378	0.00225	0.124942
fam213b	NC_007122.6:40358220-40383021	control	15	OK	10.3969	17.5028	0.751437	2.26287	0.0264	0.551001
fam222a	NC_007116.6:19153435-19250879	control	15	OK	7.99042	5.07498	-0.654869	-2.00899	0.037	0.646259
fam46bb	NC_007130.6:14669647-14684052	control	15	OK	5.50018	2.89762	-0.924609	-2.61459	0.01165	0.354836
fam46c	NC_007120.6:20970211-20975769	control	15	OK	7.72198	5.03106	-0.618108	-1.95742	0.04645	0.711722
fank1	NC_007123.6:44753228-44771284	control	15	OK	0.319786	1.21047	1.92039	2.86212	0.01475	0.40833
fap	NC_007120.6:51693830-51730149	control	15	OK	12.7506	7.93205	-0.684795	-2.20044	0.03185	0.604563
fat2	NC_007125.6:25806139-25879903	control	15	OK	1.53289	2.62378	0.77539	2.484	0.01165	0.354836
fbln7	NC_007124.6:47461224-47510332	control	15	OK	2.4836	1.07489	-1.20824	-2.78042	0.005	0.211678
fbp1a	NC_007116.6:44233159-44243495	control	15	OK	23.9299	48.8446	1.02939	3.36405	0.0013	0.0873607
fbp2	NC_007116.6:44213836-44229549	control	15	OK	21.4893	7.64448	-1.49113	-4.28378	5e-05	0.00654421
fbxo40.2	NC_007132.6:22694682-22700696	control	15	OK	3.68089	1.0267	-1.84204	-4.22507	0.00025	0.0256683
fech	NC_007132.6:1619927-1653643	control	15	OK	1.10058	3.69197	1.74613	3.47558	0.0013	0.0873607
fgf11b	NC_007121.6:22192421-22279749	control	15	OK	1.06639	0.296006	-1.84904	-3.93267	0.0006	0.0496031
fgf12a	NC_007113.6:5675545-5770239	control	15	OK	4.47116	2.32312	-0.944584	-2.43366	0.01225	0.365948
fgf12b	NC_007126.6:45391473-45492160	control	15	OK	12.8117	6.14613	-1.05971	-2.85828	0.00385	0.177361
fgf6a	NC_007136.6:16848830-16857765	control	15	OK	5.44025	2.97044	-0.872994	-2.31462	0.01775	0.450983
fgf6b	NC_007115.6:5172160-5174757	control	15	OK	3.75826	0.565377	-2.73278	-3.45703	0.01795	0.453432
fgfbp2b	NC_007112.6:21995210-22000443	control	15	OK	98.0714	38.3298	-1.35536	-4.39857	5e-05	0.00654421
fgfrl1b	NC_007125.6:41233087-41311602	control	15	OK	7.14565	4.56149	-0.647559	-1.99953	0.04355	0.699427
fhl2a	NC_007120.6:6600696-6624006	control	15	OK	16.8861	9.18222	-0.878922	-2.68198	0.006	0.239942
fhod3a	NC_007130.6:712090-769164	control	15	OK	5.46167	2.27575	-1.263	-3.77453	5e-05	0.00654421
fitm1	NC_007113.6:24649160-24653787	control	15	OK	11.9537	6.9298	-0.786566	-2.17665	0.028	0.567152
flna	NC_007134.6:19827580-19882682	control	15	OK	20.2123	35.4722	0.811454	2.40887	0.01365	0.39237
flnca	NC_007136.6:34515031-34536110	control	15	OK	1.83718	3.62424	0.980187	3.0166	0.00225	0.124942
fn1b	NC_007112.6:4806325-4845281	control	15	OK	14.2706	58.2055	2.02811	5.94378	5e-05	0.00654421
fndc7	NC_007113.6:45691659-45717445	control	15	OK	2.17659	0.939003	-1.21287	-2.77092	0.0055	0.224826
fos	NC_007131.6:46648590-46650704	control	15	OK	12.0563	23.8391	0.983537	3.12192	0.00175	0.106095
fosl1a	NC_007125.6:30399157-30407475	control	15	OK	1.53328	18.5548	3.5971	9.24524	5e-05	0.00654421
foxc1b	NC_007131.6:26803284-26805235	control	15	OK	18.5107	11.3036	-0.711569	-2.26756	0.0244	0.530444
foxe1	NC_007112.6:26007510-26009569	control	15	OK	0.920065	0.359898	-1.35415	-2.1239	0.0476	0.718804
foxn4	NC_007116.6:18881702-18896588	control	15	OK	12.6521	19.9192	0.654786	2.06736	0.0346	0.628318
foxq1a	NC_007113.6:848412-849804	control	15	OK	12.663	20.0092	0.660044	2.03999	0.041	0.68048
foxq1b	NC_007131.6:26784849-26786305	control	15	OK	3.13768	8.4109	1.42256	3.5573	0.0012	0.0822993
fpgs	NC_007132.6:6009200-6028982	control	15	OK	6.92243	11.5987	0.744616	2.32845	0.0229	0.514116
fras1	NC_007116.6:38237006-38486624	control	15	OK	3.48514	5.41357	0.635362	2.05087	0.03695	0.645546
frem1a	NC_007118.6:69417983-69487844	control	15	OK	3.63615	5.82006	0.678623	2.19178	0.0263	0.549733
frem1b	NC_007133.6:17091450-17165296	control	15	OK	1.72513	0.988967	-0.802712	-2.16652	0.02845	0.571965
frem2a	NC_007121.6:26020616-26153740	control	15	OK	1.82768	4.0429	1.14538	3.63711	0.00025	0.0256683
frem2b	NC_007126.6:32578409-32738153	control	15	OK	4.12013	7.11044	0.787249	2.57203	0.00835	0.296197
frk	NC_007131.6:451347-476036	control	15	OK	3.60145	5.72712	0.669233	2.01223	0.03905	0.664334
frmpd1	NC_007112.6:21189361-21241233	control	15	OK	0.963748	0.504279	-0.934432	-2.21203	0.0331	0.614139
frzb	NC_007120.6:45031016-45037738	control	15	OK	2.92634	0.68922	-2.08606	-4.41217	0.0003	0.0297548
fscn2b	NC_007123.6:34337559-34370667	control	15	OK	3.89815	1.71677	-1.18309	-2.43121	0.01645	0.433037
fth1a	NC_007118.6:12675256-12683988	control	15	OK	615.802	1328.66	1.10943	2.74424	0.00775	0.282498
ftr83	NC_007116.6:30141563-30149341	control	15	OK	15.8746	24.3732	0.618572	1.99492	0.0387	0.661756
fuca1.1	NC_007130.6:32908298-32913138	control	15	OK	46.4992	87.6337	0.91428	2.96527	0.00315	0.156879
fuca2	NC_007128.6:6280818-6307213	control	15	OK	38.419	58.9945	0.618759	1.93802	0.04745	0.718398
fxr2	NC_007118.6:22447097-22489935	control	15	OK	27.7454	17.3685	-0.675771	-2.20848	0.02445	0.530543
g6pca.2	NC_007123.6:6007977-6029727	control	15	OK	15.8936	28.0663	0.820395	2.04902	0.03585	0.637865
g6pd	NC_007134.6:14088813-14118717	control	15	OK	10.7833	27.2795	1.33903	4.11621	5e-05	0.00654421
gabpa	NC_007120.6:35205356-35216334	control	15	OK	22.0728	36.8627	0.739893	2.39152	0.0139	0.396464
gabrb2	NC_007125.6:21874761-21976605	control	15	OK	2.1054	1.07547	-0.969134	-2.24739	0.02305	0.515994
gabrb3	NC_007117.6:38367426-38515982	control	15	OK	3.13197	1.20636	-1.3764	-2.28087	0.0221	0.504567
gabrg1	NC_007124.6:12036821-12070551	control	15	OK	1.49875	0.704491	-1.08911	-2.20619	0.0352	0.632814
gabrr3a	NC_007121.6:35423588-35466847	control	15	OK	1.58119	0.548225	-1.52817	-2.47583	0.0152	0.414144
gabrz	NC_007123.6:28939923-28990629	control	15	OK	1.13093	0.554908	-1.02719	-2.00455	0.03925	0.665473
gadd45ba	NC_007122.6:6446306-6447909	control	15	OK	15.3402	29.5761	0.947118	2.98551	0.0025	0.13435
gadd45bb	NC_007113.6:36957483-36959531	control	15	OK	5.26334	9.24514	0.812716	2.0982	0.0413	0.68303
galnt13	NC_007120.6:4572907-4640038	control	15	OK	3.65663	1.99871	-0.871448	-2.20152	0.02645	0.551715
galnt6	NC_007134.6:26836352-26858177	control	15	OK	7.8191	12.0404	0.622808	1.96365	0.04515	0.706805
gata6	NC_007113.6:4366036-4377377	control	15	OK	8.01384	13.9434	0.799014	2.47049	0.01115	0.343039
gcga	NC_007133.6:11585388-11596336	control	15	OK	4.39981	10.4159	1.24328	3.08966	0.0024	0.130884
gcgb	NC_007120.6:51733859-51740173	control	15	OK	11.4664	23.2122	1.01748	2.60648	0.0133	0.385794
gcgrb	NC_007112.6:55674094-55693830	control	15	OK	1.31581	0.591902	-1.15252	-2.23255	0.02275	0.511897
gch1	NC_007128.6:15115984-15141330	control	15	OK	3.81519	7.63132	1.00018	2.42576	0.01005	0.326244
gclc	NC_007124.6:2261360-2296362	control	15	OK	9.82013	25.3827	1.37003	4.45574	5e-05	0.00654421
gclm	NC_007119.6:15231632-15239547	control	15	OK	14.7983	30.1253	1.02554	3.26868	0.00075	0.0584825
gcnt3	NC_007136.6:33793112-33794701	control	15	OK	0.252023	0.92082	1.86936	2.50412	0.03655	0.643212
gcnt4a	NC_007116.6:50379992-50383512	control	15	OK	10.4244	16.1437	0.631005	1.96939	0.04885	0.726864
gdf10b	NC_007123.6:2597070-2623211	control	15	OK	2.09051	0.665357	-1.65165	-2.69378	0.01625	0.430198
gdf5	NC_007117.6:52639094-52645767	control	15	OK	2.3782	0.63165	-1.91267	-3.81723	0.0008	0.0609558
gfap	NC_007114.6:31660726-31673097	control	15	OK	85.238	37.9857	-1.16604	-3.7071	0.00015	0.0170511
gfra4a	NC_007124.6:14059526-14356532	control	15	OK	1.10794	0.51956	-1.09252	-2.36081	0.0172	0.443771
ggctb	NC_007127.6:53902185-54096789	control	15	OK	26.9176	9.49736	-1.50295	-2.91975	0.0065	0.251742
glb1	NC_007112.6:51827331-51844005	control	15	OK	5.04713	7.9925	0.663185	1.93489	0.0495	0.72864
gldn	NC_007129.6:39668563-39682418	control	15	OK	1.18022	0.522206	-1.17636	-2.11498	0.03165	0.603384
glmnb	NC_007117.6:28979443-28990331	control	15	OK	2.9766	0.997215	-1.57769	-3.26308	0.0026	0.138133
glra3	NC_007112.6:37697211-37819055	control	15	OK	2.59443	1.36192	-0.929772	-2.21086	0.02785	0.56575
glra4a	NC_007125.6:38661800-38734378	control	15	OK	13.5228	8.43114	-0.681593	-2.15986	0.0268	0.555376
glrba	NC_007112.6:20730066-20798575	control	15	OK	1.22448	0.534547	-1.19578	-2.07144	0.02585	0.545045
glrx	NC_007132.6:11686199-11728152	control	15	OK	54.4938	129.296	1.24651	3.83402	0.0001	0.0119493
gls2a	NC_007119.6:21131886-21152812	control	15	OK	0.641665	0.227666	-1.49491	-2.53941	0.01735	0.445671
gltscr2	NC_007126.6:6655107-6669139	control	15	OK	75.5161	119.766	0.665364	2.12815	0.03515	0.632564
gmds	NC_007131.6:26809918-26923460	control	15	OK	20.8153	36.1782	0.797478	2.61784	0.00745	0.274998
gmpr	NC_007130.6:32885163-32900418	control	15	OK	26.0134	12.4537	-1.06268	-3.41086	0.0007	0.0554481
gnai2b	NC_007117.6:53051836-53145372	control	15	OK	12.5177	7.29724	-0.77855	-2.36605	0.01955	0.475991
gnao1b	NC_007118.6:28862353-28873396	control	15	OK	29.3176	16.9049	-0.794326	-2.59735	0.00965	0.321772
gnat2	NC_007119.6:25170861-25216514	control	15	OK	9.12209	0.949504	-3.26412	-2.57921	0.0378	0.653871
gnb2	NC_007116.6:37662780-37697395	control	15	OK	16.2468	9.90395	-0.714079	-2.23067	0.02275	0.511897
gnb3a	NC_007127.6:12131647-12158860	control	15	OK	49.3331	21.4622	-1.20075	-3.90951	0.0001	0.0119493
gnb3b	NC_007130.6:5189739-5209177	control	15	OK	7.76033	0.310479	-4.64355	-7.52011	5e-05	0.00654421
gnb5b	NC_007129.6:39086566-39124288	control	15	OK	8.23105	4.64928	-0.82407	-2.29044	0.0235	0.519918
gng13b	NC_007114.6:35459703-35472707	control	15	OK	56.2544	26.4364	-1.08944	-3.54762	0.0003	0.0297548
gngt2b	NC_007123.6:3420164-3423374	control	15	OK	48.2015	1.77457	-4.76353	-8.77602	5e-05	0.00654421
gnmt	NC_007128.6:48885681-48899794	control	15	OK	35.5336	65.2429	0.876636	2.83393	0.0041	0.185222
gnsb	NC_007121.6:45184723-45201436	control	15	OK	6.28796	12.8638	1.03265	3.12244	0.0014	0.0910234
gpc2	NC_007125.6:159532-169324	control	15	OK	9.38726	5.65365	-0.731522	-2.26887	0.0201	0.483664
gpd1a	NC_007119.6:6989512-7008945	control	15	OK	12.1894	7.22846	-0.753865	-2.16231	0.03215	0.60664
gpib	NC_007129.6:512819-534703	control	15	OK	34.0055	17.6489	-0.946193	-3.08494	0.0022	0.123537
gpr123	NC_007123.6:29058628-29096839	control	15	OK	3.04551	1.6844	-0.854453	-2.34551	0.01905	0.469201
gpr137bb	NC_007125.6:26141104-26152596	control	15	OK	2.7665	5.74133	1.05332	2.68751	0.00805	0.289961
gpr153	NC_007119.6:46664472-46755405	control	15	OK	2.54169	1.35938	-0.902842	-2.10754	0.0273	0.560759
gpr17	NC_007117.6:28124821-28139533	control	15	OK	3.00459	1.51397	-0.988833	-2.80296	0.0036	0.171136
gpr179	NC_007122.6:12070057-12108847	control	15	OK	0.639718	0.300704	-1.08909	-2.20616	0.0352	0.632814
gpr182	NC_007134.6:36530914-36533179	control	15	OK	4.75503	2.10798	-1.17359	-2.64112	0.0126	0.372746
gpr185a	NC_007132.6:43563970-43567657	control	15	OK	1.14353	0.359958	-1.66759	-2.32282	0.0411	0.68117
gpr34a	NW_003334505.1:3656-4293	control	15	OK	0.871132	0	#NAME?	#NAME?	0.0007	0.0554481
gpr37b	NC_007115.6:3970738-3990517	control	15	OK	7.23207	3.68693	-0.971988	-2.66146	0.0076	0.27921
gpr39	NC_007120.6:56873297-56877232	control	15	OK	2.34581	0.694185	-1.7567	-3.71454	0.00115	0.0798874
gpr64	NC_007135.6:25139738-25156588	control	15	OK	0.936991	1.97646	1.07682	2.56405	0.0126	0.372746
gpr84	NC_007117.6:39116795-39121606	control	15	OK	0.247442	1.58237	2.67693	3.74738	0.0047	0.202031
gpr85	NC_007115.6:6634943-6639035	control	15	OK	12.8787	7.98464	-0.689683	-2.20051	0.02985	0.583688
gpx1a	NC_007122.6:35780280-35894996	control	15	OK	39.6212	113.963	1.52422	2.71175	0.00915	0.311327
gpx4a	NC_007133.6:17564629-17572002	control	15	OK	277.252	642.063	1.21152	3.5273	0.00035	0.0331638
gra	NC_007127.6:16314416-16318243	control	15	OK	0.670976	1.8504	1.46351	2.70591	0.013	0.381197
grhl3	NC_007128.6:26946968-26958792	control	15	OK	2.78375	5.90441	1.08476	2.98679	0.00365	0.171648
gria1a	NC_007125.6:33786570-33936307	control	15	OK	5.44891	3.18932	-0.772717	-2.16881	0.02455	0.531889
gria1b	NC_007132.6:26112257-26214053	control	15	OK	1.75221	0.804546	-1.12293	-2.81297	0.0039	0.178373
gria2b	NC_007125.6:35408031-35473302	control	15	OK	9.06731	5.07539	-0.837156	-2.51885	0.00995	0.325992
gria3a	NC_007116.6:22848551-22925725	control	15	OK	9.36636	4.11902	-1.18519	-3.52856	0.0006	0.0496031
gria3b	NC_007125.6:12230068-12531223	control	15	OK	7.77257	3.34171	-1.2178	-3.14657	0.0018	0.108376
gria4b	NC_007132.6:21869965-22047188	control	15	OK	12.8898	7.7762	-0.729095	-2.28847	0.017	0.441212
grid2ipb	NC_007123.6:18456907-18535367	control	15	OK	1.64002	0.694612	-1.23944	-2.9018	0.0039	0.178373
grifin	NC_007114.6:41644002-41649320	control	15	OK	5.54969	2.41806	-1.19856	-2.2001	0.03695	0.645546
grik1a	NC_007121.6:25441308-25600137	control	15	OK	1.22842	0.61058	-1.00856	-2.00936	0.0348	0.629827
grin1a	NC_007132.6:11352750-11410343	control	15	OK	15.7815	9.07158	-0.798806	-2.57593	0.0083	0.295471
grin1b	NC_007116.6:28997790-29043676	control	15	OK	13.3513	6.54234	-1.0291	-3.33002	0.00055	0.0465129
grin2aa	NC_007114.6:26940852-27146833	control	15	OK	1.90244	1.00742	-0.917187	-2.62074	0.008	0.288606
grin2ab	NC_007112.6:8079545-8234043	control	15	OK	1.85124	0.799664	-1.21102	-3.26599	0.00185	0.109875
grk7a	NC_007113.6:16867905-16875571	control	15	OK	2.21124	0.403342	-2.45478	-4.84199	5e-05	0.00654421
grm1a	NC_007131.6:32144505-32209928	control	15	OK	2.29306	1.30784	-0.810085	-2.14054	0.0265	0.552429
grm6a	NC_007119.6:8471766-8595841	control	15	OK	0.764275	0.220096	-1.79596	-3.01164	0.0059	0.237026
grm6b	NC_007122.6:25396424-25441517	control	15	OK	2.41559	1.0428	-1.21191	-2.96447	0.004	0.181524
grna	NC_007114.6:29783584-29810515	control	15	OK	0.465721	1.27637	1.45451	2.65235	0.00345	0.166034
gsnb	NC_007116.6:62594709-62609559	control	15	OK	61.4563	97.853	0.671055	2.04127	0.0362	0.640433
gsr	NC_007125.6:38512654-38532816	control	15	OK	11.1347	98.7393	3.14856	9.74902	5e-05	0.00654421
gss	NC_007134.6:14987009-15013385	control	15	OK	3.62493	9.83177	1.4395	4.01124	0.00015	0.0170511
gsto2	NC_007124.6:25266501-25272311	control	15	OK	39.0744	139.843	1.83951	5.94277	5e-05	0.00654421
gstp1	NC_007125.6:3399998-3406739	control	15	OK	478.895	3196.61	2.73876	6.21313	5e-05	0.00654421
gstp2	NC_007125.6:3388235-3396243	control	15	OK	4.30422	49.2002	3.51484	8.41507	5e-05	0.00654421
gstz1	NC_007128.6:44992615-45000041	control	15	OK	11.7571	20.0325	0.768811	2.11621	0.0281	0.568191
gtpbp1	NC_007114.6:33308838-33328050	control	15	OK	18.673	33.5795	0.846629	2.76091	0.0049	0.208073
gtpbp2	NC_007124.6:729085-744087	control	15	OK	11.2941	21.9332	0.957555	1.97747	0.02885	0.577025
gtpbp4	NC_007113.6:42511954-42525815	control	15	OK	83.4968	132.04	0.661186	2.0179	0.0461	0.711328
gucy1a3	NC_007112.6:25092793-25108222	control	15	OK	2.42867	1.09393	-1.15064	-2.54413	0.01165	0.354836
guk1b	NC_007119.6:18195235-18203815	control	15	OK	8.40454	1.79391	-2.22806	-4.89673	5e-05	0.00654421
gyg1b	NC_007135.6:3225585-3310878	control	15	OK	17.47	8.2503	-1.08236	-2.05875	0.03755	0.652286
gypc	NC_007120.6:23854884-23908852	control	15	OK	8.03293	4.62195	-0.797425	-2.31951	0.01855	0.463075
gys1	NC_007114.6:16572426-16611135	control	15	OK	25.1131	8.75707	-1.51992	-4.22675	5e-05	0.00654421
h1fx	NC_007117.6:40772749-40774061	control	15	OK	43.9066	72.3625	0.720804	2.35223	0.0202	0.484572
haao	NC_007124.6:8622629-8651559	control	15	OK	9.53273	3.88907	-1.29346	-3.23068	0.00165	0.102065
habp2	NC_007123.6:31598296-31604803	control	15	OK	5.11473	2.0174	-1.34216	-3.14162	0.0033	0.161479
hagh	NC_007114.6:18624768-18642811	control	15	OK	14.7602	39.5145	1.42067	4.54563	5e-05	0.00654421
hamp	NC_007127.6:50687695-50696684	control	15	OK	3.12455	7.51875	1.26684	2.48178	0.014	0.397374
hapln1b	NC_007121.6:43444601-43506558	control	15	OK	4.11287	1.66682	-1.30305	-3.02273	0.0036	0.171136
haus7,si:dkey-93l1.9	NC_007134.6:19896079-19907062	control	15	OK	7.95449	14.3191	0.8481	2.34627	0.01755	0.448833
hbbe1.1	NC_007114.6:54859509-54860272	control	15	OK	1605.45	3727.35	1.21517	2.8917	0.00355	0.169449
hbbe3	NC_007123.6:20217594-20218669	control	15	OK	35.7444	549.333	3.94189	11.6938	5e-05	0.00654421
hbegfa	NC_007125.6:6742265-6745213	control	15	OK	10.2201	18.2225	0.834321	2.60742	0.01085	0.338117
hbl4	NC_007113.6:37897354-37900763	control	15	OK	3.49163	9.27569	1.40955	3.35375	0.002	0.115075
hbp1	NC_007136.6:3325104-3345176	control	15	OK	11.4813	20.074	0.806034	2.54399	0.00885	0.306026
hcn2b	NC_007133.6:18927016-18984780	control	15	OK	1.51769	0.871029	-0.801082	-1.973	0.04085	0.679948
hdac9b	NC_007127.6:20034573-20084933	control	15	OK	4.63856	2.56569	-0.854332	-2.36732	0.01525	0.41486
he1a,he1b	NC_007133.6:14059258-14090539	control	15	OK	32.748	373.64	3.51217	7.96833	5e-05	0.00654421
hebp2	NC_007131.6:30990442-30998122	control	15	OK	13.6313	49.0242	1.84657	5.71684	5e-05	0.00654421
heg	NC_007120.6:38875075-38897715	control	15	OK	2.92052	1.6015	-0.866799	-2.37085	0.0196	0.47638
hephl1	NC_007126.6:2457966-2509455	control	15	OK	2.41243	4.85717	1.00963	3.01673	0.0029	0.148441
her3	NC_007119.6:46651106-46652327	control	15	OK	0.214475	1.38959	2.69578	2.84539	0.04995	0.731879
hes2.1	NC_007119.6:46930650-46935986	control	15	OK	3.57874	7.34326	1.03697	2.28802	0.0234	0.518525
hexa	NC_007116.6:33978301-34016489	control	15	OK	24.8282	42.5004	0.775498	2.22103	0.02285	0.513487
hgd	NC_007135.6:23814377-23825872	control	15	OK	11.4418	21.025	0.877791	2.74529	0.0061	0.241459
hgfa	NC_007115.6:19721672-19895193	control	15	OK	8.11262	3.60999	-1.16817	-3.35079	0.0006	0.0496031
hhatla	NC_007113.6:21679750-21693997	control	15	OK	94.6749	43.179	-1.13265	-3.55754	0.0004	0.0363284
hic1	NC_007126.6:25745778-25757375	control	15	OK	3.67719	1.72744	-1.08997	-3.01473	0.00245	0.132068
hif1al2	NC_007132.6:27289328-27302665	control	15	OK	3.65283	6.0402	0.725581	1.90166	0.0479	0.720537
higd1a	NC_007113.6:1825740-1830943	control	15	OK	18.7307	63.8894	1.77017	5.69005	5e-05	0.00654421
hip1rb	NC_007116.6:65684301-65750253	control	15	OK	5.31439	8.43679	0.666791	2.03015	0.0357	0.636087
histh1l	NC_007116.6:26832825-26834198	control	15	OK	168.613	395.109	1.22854	3.56896	0.0005	0.0436552
hivep1	NC_007130.6:3445235-3547631	control	15	OK	1.56263	2.45851	0.653806	1.9636	0.03715	0.647909
hlfa	NC_007114.6:11618752-11657960	control	15	OK	15.0118	9.71925	-0.627179	-1.94306	0.04715	0.71649
hm:zewp0073	NC_007130.6:47988577-47994969	control	15	OK	49.9127	15.6488	-1.67335	-5.33874	5e-05	0.00654421
hmbsb	NC_007126.6:23576081-23587957	control	15	OK	6.21368	15.3217	1.30206	4.08496	0.0001	0.0119493
hmcn1	NC_007131.6:34254428-34389728	control	15	OK	0.971172	1.56213	0.68572	2.00486	0.03485	0.63008
hmga1b	NC_007117.6:54134237-54144875	control	15	OK	14.4759	8.25297	-0.810668	-2.63708	0.00845	0.298383
hmgcll1	NC_007124.6:1796924-1929380	control	15	OK	0.754321	0.211799	-1.83249	-0.87896	0.0418	0.688211
hmgcra	NC_007116.6:50326152-50346149	control	15	OK	2.52017	4.98328	0.983576	2.83051	0.00445	0.19463
hmox1a	NC_007114.6:25880610-25886721	control	15	OK	11.2581	31.904	1.50278	4.66544	5e-05	0.00654421
hnf4b	NW_008805355.1:1140-1511	control	15	OK	4.75679	13.8322	1.53997	2.71331	0.0152	0.414144
homer1b	NC_007116.6:51128389-51184428	control	15	OK	12.0121	7.33495	-0.711629	-2.21271	0.02715	0.559483
hoxa9a	NC_007130.6:20177149-20179188	control	15	OK	7.23057	3.51615	-1.04011	-2.74825	0.0072	0.269607
hoxb10a	NC_007114.6:23538275-23541589	control	15	OK	5.70036	2.05043	-1.47513	-3.69916	0.0009	0.0667592
hoxb9a	NC_007114.6:23546774-23551888	control	15	OK	16.8633	8.45823	-0.995459	-3.13502	0.0011	0.0774124
hpdb	NC_007119.6:34797181-34807435	control	15	OK	6.22808	11.2672	0.855276	2.46947	0.01375	0.393951
hrasls	NC_007122.6:45044043-45048322	control	15	OK	8.67719	2.88681	-1.58775	-3.27001	0.0016	0.0998545
hsc70	NC_007126.6:37934330-37949391	control	15	OK	24.9648	11.4853	-1.12011	-3.60148	0.0002	0.0215787
hsd17b12a	NC_007136.6:29753047-29787552	control	15	OK	13.6884	40.2076	1.55451	5.02136	5e-05	0.00654421
hsd17b14	NC_007114.6:29838302-29846613	control	15	OK	5.28928	10.0227	0.922128	2.73226	0.00685	0.261536
hsd3b1	NC_007131.6:1251655-1255478	control	15	OK	0.288813	0.942018	1.70562	2.16983	0.04625	0.711578
hsh2d	NC_007133.6:15544922-15552219	control	15	OK	0.427027	1.49923	1.81182	3.01123	0.00595	0.238487
hsp70	NC_007114.6:25992846-25996113	control	15	OK	13.8052	49.2589	1.83517	5.95218	5e-05	0.00654421
hsp70.2	NC_007114.6:25988736-25991541	control	15	OK	12.3497	31.8252	1.3657	4.43904	5e-05	0.00654421
hsp70l	NC_007119.6:4741890-4744644	control	15	OK	4.12475	23.8715	2.53291	7.50416	5e-05	0.00654421
hsp90aa1.1,hsp90aa1.2	NC_007131.6:54177898-54206788	control	15	OK	83.3093	165.261	0.988197	2.89678	0.00335	0.163127
hsp90b1	NC_007115.6:9835592-9842920	control	15	OK	126.387	64.2812	-0.975381	-2.95403	0.00335	0.163127
hspa5	NC_007116.6:2440678-2448587	control	15	OK	176.525	104.157	-0.761107	-2.25487	0.0247	0.533817
hspb1	NC_007116.6:3238392-3244467	control	15	OK	33.9064	84.8944	1.32411	4.30182	5e-05	0.00654421
hspb11	NC_007132.6:20347318-20348242	control	15	OK	10.2108	38.8773	1.92884	5.55585	5e-05	0.00654421
hspb6	NC_007126.6:37657939-37688029	control	15	OK	3.30841	1.5487	-1.09508	-1.98333	0.0442	0.701336
hspb9	NC_007114.6:33168823-33169482	control	15	OK	11.0266	51.8238	2.23262	6.10559	5e-05	0.00654421
hsph1	NC_007126.6:31683215-31707563	control	15	OK	0.544823	1.68429	1.62828	3.26068	0.00185	0.109875
htatip2	NC_007118.6:16844338-16851210	control	15	OK	12.2441	39.6913	1.69674	5.19932	5e-05	0.00654421
htr1d	NC_007128.6:28149915-28181141	control	15	OK	1.04555	0.406053	-1.36452	-2.24109	0.0272	0.55969
htr4	NC_007125.6:24836077-25011976	control	15	OK	0.81209	0.282885	-1.52142	-2.22932	0.02405	0.526596
htra1a	NC_007128.6:21899294-21939649	control	15	OK	8.06936	4.89627	-0.720771	-2.06708	0.0382	0.657432
hyou1	NC_007121.6:29883890-29905126	control	15	OK	20.0023	12.7791	-0.646384	-2.11004	0.03335	0.616816
iars	NC_007122.6:1308227-1365873	control	15	OK	15.2527	27.2641	0.837937	2.63428	0.00725	0.270323
idh1	NC_007120.6:28293872-28317288	control	15	OK	39.7175	68.5197	0.786747	2.51202	0.0121	0.363483
ier2	NC_007114.6:33629940-33631106	control	15	OK	21.1639	45.8187	1.11433	3.57131	0.0001	0.0119493
ier2	NC_007122.6:30791747-30792260	control	15	OK	16.4154	28.5917	0.800545	2.10516	0.04005	0.672846
igf2bp3	NC_007130.6:20616564-20661377	control	15	OK	27.189	14.4678	-0.910184	-2.81955	0.00275	0.14349
igf2r	NC_007131.6:42667936-42763474	control	15	OK	2.34247	3.95604	0.756026	2.38382	0.01455	0.40672
igfbp1a	NC_007134.6:36478992-36484198	control	15	OK	2.81434	1.01571	-1.47031	-2.90447	0.00575	0.232467
igfbp6b	NC_007131.6:6818826-6822654	control	15	OK	9.47099	41.5154	2.13206	6.66625	5e-05	0.00654421
igfn1.1,igfn1.3	NC_007117.6:46841894-46939483	control	15	OK	37.9073	6.07873	-2.64064	-7.98888	5e-05	0.00654421
igsf21a	NC_007122.6:28395736-28835044	control	15	OK	4.45243	2.63247	-0.758176	-2.05978	0.03475	0.629573
il10rb	NC_007120.6:70988-91207	control	15	OK	18.578	31.0247	0.739824	1.95354	0.04665	0.712759
il1b	NC_007121.6:45108694-45117163	control	15	OK	0.231809	3.5573	3.93978	5.57175	0.0012	0.0822993
il20ra	NC_007131.6:2572242-2592157	control	15	OK	2.27449	4.12157	0.857652	2.22964	0.027	0.557541
il21r.1	NC_007114.6:47391332-47409201	control	15	OK	0.434323	1.32694	1.61126	2.5942	0.00895	0.307359
il4r.1	NC_007114.6:43299841-43359124	control	15	OK	1.9418	5.00687	1.36652	2.21185	0.02455	0.531889
il4r.2	NC_007114.6:43299841-43359124	control	15	OK	2.25993	5.89966	1.38435	2.92221	0.0023	0.127013
il6st	NC_007121.6:5787326-5820422	control	15	OK	6.2216	11.6983	0.910944	2.6794	0.0051	0.213715
ildr1a	NC_007112.6:44838-49831	control	15	OK	10.6414	19.0261	0.838286	2.67581	0.00855	0.300701
im:7137886	NC_007125.6:7391320-7437739	control	15	OK	14.7419	69.6186	2.23955	3.80175	0.0004	0.0363284
im:7152348	NC_007117.6:27893810-27901422	control	15	OK	9.5023	15.5142	0.707244	2.13343	0.0317	0.603679
im:7154332	NC_007122.6:6893133-6960294	control	15	OK	5.98066	2.15763	-1.47086	-2.83189	0.00585	0.235287
im:7165146	NC_007123.6:3043432-3059023	control	15	OK	15.2744	7.76129	-0.976742	-2.96656	0.00315	0.156879
impg2b	NC_007133.6:28370161-28408448	control	15	OK	1.82401	0.337229	-2.43531	-6.04193	5e-05	0.00654421
inab	NC_007112.6:31131696-31138011	control	15	OK	20.7121	12.7481	-0.700187	-2.02812	0.03565	0.635681
ing5b	NC_007113.6:36623548-36626303	control	15	OK	6.3609	10.6195	0.739419	1.94049	0.0431	0.69539
ino80e	NC_007127.6:10522625-10537049	control	15	OK	31.8057	52.8532	0.732705	2.19724	0.0269	0.556132
ins	NC_007116.6:37254541-37257536	control	15	OK	27.8745	50.2473	0.850101	2.41776	0.01555	0.419437
insc	NC_007133.6:39171945-39180005	control	15	OK	1.76649	0.612609	-1.52784	-2.7491	0.0139	0.396464
insig1	NC_007118.6:40683254-40734665	control	15	OK	11.3322	25.0528	1.14455	3.09148	0.00235	0.128961
ipcef1	NC_007131.6:4505888-4515559	control	15	OK	1.44202	4.41857	1.61549	3.15132	0.0024	0.130884
iqsec2	NC_007119.6:36769731-36945588	control	15	OK	2.40846	3.81881	0.665012	2.00006	0.0401	0.673201
irak3	NC_007115.6:12783416-12792135	control	15	OK	0.516338	1.22169	1.24249	2.10824	0.03645	0.642583
irbp	NC_007123.6:2625939-2635427	control	15	OK	3.29119	1.46419	-1.16851	-2.71975	0.00795	0.287246
irf3	NC_007123.6:4516935-4563225	control	15	OK	0.711023	1.98912	1.48416	2.57205	0.0142	0.400938
irf7	NC_007136.6:25451155-25455843	control	15	OK	2.46367	5.11814	1.05481	2.47766	0.01415	0.400334
irf9	NC_007123.6:13244437-13268580	control	15	OK	3.45043	7.13296	1.04773	2.7469	0.0048	0.20482
irg1	NC_007120.6:22021311-22027176	control	15	OK	0.686935	2.84326	2.0493	3.79423	0.0014	0.0910234
irg1l	NC_007125.6:11121037-11124541	control	15	OK	6.53174	21.6225	1.727	5.27199	5e-05	0.00654421
iscub	NC_007116.6:31259884-31268694	control	15	OK	2.92831	6.73472	1.20155	2.68042	0.00785	0.285252
isg15	NC_007116.6:19608231-19609486	control	15	OK	0.209806	3.86346	4.20276	4.85489	0.01995	0.481046
isg20	NC_007136.6:18997292-19002529	control	15	OK	14.9592	30.6076	1.03286	3.30269	0.00095	0.0695108
ist1	NC_007118.6:56171118-56183387	control	15	OK	37.2068	58.2847	0.647553	2.09214	0.03105	0.596165
itga1	NC_007121.6:8897362-9008672	control	15	OK	4.11295	2.60647	-0.658076	-1.92775	0.04725	0.71692
itga10	NC_007127.6:14359425-14463707	control	15	OK	4.14622	1.30101	-1.67217	-3.53837	0.0009	0.0667592
itga2.2	NC_007121.6:9052173-9108694	control	15	OK	2.18795	3.57169	0.707026	2.04823	0.0362	0.640433
itga6b	NC_007112.6:30215224-30260783	control	15	OK	13.3533	24.4038	0.869908	2.83156	0.00415	0.186041
itga6b	NC_007123.6:5549553-5628662	control	15	OK	7.81807	3.74648	-1.06127	-2.86461	0.0032	0.158021
itga9	NC_007124.6:47567821-47767783	control	15	OK	3.65898	1.9828	-0.883902	-2.32098	0.01625	0.430198
itgb1b.2	NC_007113.6:43719747-43733981	control	15	OK	17.0178	27.2982	0.681761	2.22493	0.02765	0.563321
itgb3a	NC_007114.6:19471152-19502217	control	15	OK	14.3364	22.7181	0.664157	2.01849	0.03835	0.658666
itgb4	NC_007119.6:13064989-13122687	control	15	OK	5.24635	10.4673	0.996502	3.08849	0.0014	0.0910234
itgbl1	NC_007120.6:31941686-32022243	control	15	OK	16.0265	6.19459	-1.37138	-4.00353	0.0002	0.0215787
itih6	NC_007134.6:26112846-26135404	control	15	OK	0.845775	0.154123	-2.45619	-3.95911	0.0019	0.11087
itln1	NC_007112.6:14530145-14537045	control	15	OK	0.197642	0.790889	2.00058	2.01113	0.03965	0.669338
itm2bb	NC_007120.6:25520062-25535714	control	15	OK	79.0004	121.929	0.626116	2.00402	0.04615	0.711328
iyd	NC_007134.6:39882019-39891465	control	15	OK	1.24229	0.370678	-1.74477	-2.27781	0.04055	0.677831
jph1a	NC_007135.6:14477795-14600238	control	15	OK	6.2093	2.87078	-1.11299	-2.66525	0.0082	0.293703
jph1b	NC_007113.6:30306916-30340818	control	15	OK	35.5818	15.4182	-1.20651	-3.75728	0.0002	0.0215787
jph2	NC_007134.6:35619469-35657382	control	15	OK	36.4211	15.6189	-1.22148	-3.74187	0.0001	0.0119493
junba	NC_007112.6:51098614-51100150	control	15	OK	8.29647	18.664	1.16969	3.47513	0.00055	0.0465129
junbb	NC_007114.6:7768568-7770219	control	15	OK	16.0767	47.5414	1.56421	5.04097	5e-05	0.00654421
kal1b	NC_007133.6:38837187-38927127	control	15	OK	5.37609	3.2317	-0.734263	-2.2272	0.02395	0.525886
kazald3	NC_007119.6:42602989-42617667	control	15	OK	7.18257	2.81674	-1.35047	-3.31277	0.002	0.115075
kbtbd11	NC_007128.6:25269658-25276458	control	15	OK	3.93421	1.84513	-1.09235	-3.27257	0.0014	0.0910234
kbtbd12	NC_007117.6:40717271-40724592	control	15	OK	7.21124	3.61734	-0.995318	-2.43782	0.0153	0.415575
kbtbd7	NC_007120.6:17416002-17418661	control	15	OK	1.66422	0.630589	-1.40008	-2.80643	0.0088	0.305504
kcna6a	NC_007136.6:19849154-19853354	control	15	OK	1.38037	0.291252	-2.24472	-3.483	0.0031	0.156504
kcnc3a	NC_007114.6:31821389-31928790	control	15	OK	8.24765	4.92503	-0.74385	-2.32087	0.01595	0.426285
kcnc3b	NC_007135.6:37086320-37140381	control	15	OK	1.45776	0.629525	-1.21142	-2.1489	0.0276	0.56263
kcnc4	NC_007119.6:24908504-24946628	control	15	OK	1.55582	0.702598	-1.1469	-2.2164	0.02665	0.553578
kcnd2	NC_007115.6:10366400-10563075	control	15	OK	2.00818	1.02707	-0.967354	-2.47654	0.0107	0.334634
kcnf1b	NC_007124.6:32816260-32866046	control	15	OK	0.880484	0.360313	-1.28905	-2.12401	0.0424	0.692392
kcng3	NC_007123.6:25117483-25126161	control	15	OK	1.4134	0.40738	-1.79472	-3.19684	0.0032	0.158021
kcnj11	NC_007136.6:22755900-22758762	control	15	OK	9.75031	5.56996	-0.807782	-2.05326	0.0394	0.666886
kcnj1a.2,kcnj1a.3,kcnj1a.4,kcnj1a.5	NC_007129.6:48503647-48563723	control	15	OK	6.36672	24.7101	1.95648	5.4074	5e-05	0.00654421
kcnj1a.6	NC_007129.6:48495174-48498262	control	15	OK	1.72754	7.72135	2.16014	5.36177	5e-05	0.00654421
kcnma1a	NC_007124.6:16390906-16758108	control	15	OK	6.12081	3.80182	-0.687032	-2.19874	0.02005	0.482793
kcnn1b	NC_007119.6:13206168-13298561	control	15	OK	1.28757	0.511654	-1.33142	-2.2393	0.01865	0.464083
kcnn3	NC_007127.6:23683875-23804622	control	15	OK	3.48881	1.98183	-0.815903	-2.23369	0.02375	0.522806
kcns3a	NC_007124.6:32444120-32448782	control	15	OK	2.19157	1.19046	-0.880447	-1.96391	0.0456	0.708289
kcnv2a	NC_007121.6:15352330-15356032	control	15	OK	1.29586	0.467906	-1.46962	-2.56644	0.0184	0.460645
kcnv2b	NC_007116.6:8573735-8585516	control	15	OK	1.7848	0.710084	-1.3297	-2.3873	0.02295	0.514414
kctd16a	NC_007125.6:23514035-23557172	control	15	OK	1.52688	0.726376	-1.07179	-2.52159	0.00865	0.302245
kdr	NC_007131.6:22321314-22380156	control	15	OK	1.28757	0.511654	-1.33142	-2.2393	0.01865	0.464083
kdrl	NC_007125.6:32643454-32704676	control	15	OK	3.48881	1.98183	-0.815903	-2.23369	0.02375	0.522806
keap1a	NC_007113.6:41985606-42071214	control	15	OK	5.09923	19.1412	1.90833	5.05657	5e-05	0.00654421
kiaa0907	NC_007127.6:54911190-54926163	control	15	OK	17.9343	10.159	-0.819965	-2.56466	0.0097	0.322978
kiaa1549la	NC_007136.6:15257723-15386016	control	15	OK	4.6188	2.69114	-0.7793	-2.3889	0.01505	0.412626
kiaa1731	NC_007126.6:146765-161346	control	15	OK	4.63563	8.67186	0.903576	2.68574	0.00665	0.255853
kif16bb	NC_007124.6:34501181-34557354	control	15	OK	0.767658	0.269268	-1.51142	-2.8687	0.00965	0.321772
kif1b,pgd	NC_007134.6:29454899-29579154	control	15	OK	45.4069	104.709	1.20541	2.99374	0.00175	0.106095
kif1c	NC_007116.6:67527240-67580795	control	15	OK	3.58299	5.58294	0.639862	1.97342	0.0439	0.701336
kif21a	NC_007136.6:35178967-35261134	control	15	OK	3.04733	1.82408	-0.74038	-2.225	0.0213	0.496006
kif25	NC_007131.6:30998315-31017494	control	15	OK	3.78863	2.18998	-0.79076	-2.04125	0.0366	0.643445
kif5ab,zgc:153102	NC_007117.6:58742940-58834139	control	15	OK	7.04781	1.41907	-2.31223	-5.56262	5e-05	0.00654421
klf12b	NC_007120.6:30909131-30981035	control	15	OK	3.87247	2.0209	-0.938255	-2.13092	0.02655	0.552813
klf17	NC_007113.6:33343318-33345470	control	15	OK	2.87384	5.11786	0.832564	2.04078	0.0441	0.701336
klf2a	NC_007133.6:15871950-15874649	control	15	OK	12.2339	6.50514	-0.911232	-2.77892	0.007	0.264666
klf2b	NC_007130.6:17832523-17838270	control	15	OK	10.9729	17.6126	0.68266	2.23642	0.02265	0.51162
klhl23	NC_007120.6:48435185-48487252	control	15	OK	1.18158	0.549092	-1.1056	-2.18512	0.0237	0.522362
klhl31	NC_007124.6:2303002-2315309	control	15	OK	38.1511	19.3502	-0.979378	-3.0516	0.0018	0.108376
klhl40a	NC_007113.6:21668535-21677148	control	15	OK	10.6308	5.05373	-1.07283	-3.13778	0.002	0.115075
klhl40b	NC_007135.6:20430803-20437518	control	15	OK	6.83328	3.39259	-1.01019	-2.76921	0.0078	0.284025
klhl41b	NC_007117.6:3519733-3529389	control	15	OK	44.0549	25.8182	-0.770912	-2.52583	0.01425	0.40154
knca7	NC_007114.6:29848415-29853079	control	15	OK	2.60626	1.27087	-1.03616	-2.30083	0.0239	0.525447
kng1	NC_007133.6:36898334-36915701	control	15	OK	18.1796	32.8992	0.855733	2.68016	0.00725	0.270323
krt1-19d	NC_007130.6:5408161-5416335	control	15	OK	24.8171	12.1059	-1.03563	-3.22833	0.0012	0.0822993
krt17	NC_007130.6:5450938-5452979	control	15	OK	339.311	136.036	-1.31862	-3.91712	0.0002	0.0215787
krt94	NC_007122.6:11484958-11487857	control	15	OK	21.1554	9.64087	-1.13379	-3.47416	0.0007	0.0554481
krt96,krt97	NC_007133.6:11726169-11749875	control	15	OK	106.801	192.256	0.848105	2.56954	0.0092	0.312118
lactbl1a	NC_007134.6:22037776-22048266	control	15	OK	1.77186	0.403126	-2.13596	-3.51216	0.00185	0.109875
lactbl1b	NC_007122.6:27880112-27909857	control	15	OK	1.05455	0.162856	-2.69495	-3.74224	0.00335	0.163127
lama2	NC_007131.6:1966183-1976427	control	15	OK	10.1958	4.53264	-1.16955	-2.94557	0.0044	0.193288
lama2	NC_007131.6:2002300-2034079	control	15	OK	8.7745	4.34739	-1.01317	-2.97776	0.0037	0.172493
lamb2	NC_007134.6:20253042-20333194	control	15	OK	8.53555	17.1894	1.00997	2.91178	0.00075	0.0584825
lamb4	NC_007136.6:31219665-31292043	control	15	OK	6.50125	13.0298	1.00303	3.18946	0.00105	0.0749482
lamp1	NC_007112.6:175023-179503	control	15	OK	9.94038	18.2001	0.87257	2.62364	0.0085	0.299545
lctlb	NC_007129.6:19467572-19495650	control	15	OK	3.46108	1.17238	-1.56178	-2.56252	0.00815	0.29251
ldb3a	NC_007124.6:22350059-22423723	control	15	OK	86.6953	36.0964	-1.2641	-3.40764	0.0003	0.0297548
ldb3b	NC_007123.6:25933705-25973150	control	15	OK	156.001	72.4867	-1.10577	-3.42676	0.0007	0.0554481
ldha	NC_007136.6:25028067-25047211	control	15	OK	136.573	58.2716	-1.22881	-3.23468	0.00155	0.097868
ldlrb	NC_007117.6:84347-93814	control	15	OK	8.53555	17.1894	1.00997	2.91178	0.00375	0.17436
lect1	NC_007120.6:54185532-54204648	control	15	OK	71.0259	122.967	0.791851	2.42261	0.03215	0.60664
lect2l	NC_007127.6:12365624-12375290	control	15	OK	8.53555	17.1894	1.00997	2.91178	0.0076	0.27921
leng9	NC_007127.6:13919784-13927935	control	15	OK	1.51229	3.30462	1.12775	2.44284	0.0142	0.400938
lepa	NC_007129.6:10719497-10721647	control	15	OK	0	1.5651	inf	#NAME?	5e-05	0.00654421
lepb	NC_007115.6:19042900-19044856	control	15	OK	0	0.615784	inf	#NAME?	0.0086	0.300948
lepr	NC_007117.6:31197290-31275713	control	15	OK	4.08994	6.28082	0.618873	1.95159	0.0456	0.708289
leprel1	NC_007133.6:24362704-24454716	control	15	OK	2.62014	4.25802	0.700539	2.07475	0.0352	0.632814
lgals3bpb	NC_007114.6:57671408-57673765	control	15	OK	4.54019	1.6067	-1.49865	-3.49499	0.0008	0.0609558
lgi3	NC_007119.6:51385933-51418299	control	15	OK	1.50561	0.654989	-1.2008	-2.28904	0.0235	0.519918
lgmn	NC_007124.6:35913842-35924434	control	15	OK	39.0665	66.2184	0.761301	2.44395	0.015	0.412062
lgsn	NC_007122.6:11279829-11283257	control	15	OK	12.8119	1.84783	-2.79359	-7.28389	5e-05	0.00654421
lim2.4	NC_007130.6:10622846-10635430	control	15	OK	43.7305	27.0898	-0.690888	-2.17894	0.02815	0.568382
limk1a	NC_007126.6:256701-343698	control	15	OK	4.08836	2.23106	-0.873796	-2.25912	0.02125	0.495666
lims2	NC_007120.6:116314-122010	control	15	OK	24.0031	11.3227	-1.084	-3.31125	0.00115	0.0798874
lin37	NC_007126.6:37688172-37698093	control	15	OK	11.6453	21.2826	0.869929	2.55376	0.01185	0.358278
lin7a	NC_007115.6:22030786-22130508	control	15	OK	15.2542	9.29869	-0.71411	-2.27128	0.0192	0.471238
lingo2b	NC_007124.6:12568524-12609385	control	15	OK	5.55165	3.34848	-0.72941	-2.02847	0.03925	0.665473
lingo3a	NC_007133.6:20547300-20610913	control	15	OK	3.72278	1.90428	-0.967134	-2.39687	0.0156	0.419976
lingo4b	NC_007127.6:29519992-29546020	control	15	OK	4.40697	2.57844	-0.773286	-2.10704	0.02965	0.582216
lmna	NC_007127.6:30562888-30611657	control	15	OK	6.01691	10.59	0.815602	2.42091	0.0141	0.399242
lmo7b	NC_007112.6:33633273-33718197	control	15	OK	2.72199	1.57574	-0.788632	-2.1058	0.0288	0.576354
lmod1	NC_007119.6:28277116-28285571	control	15	OK	1.59772	0.45829	-1.80169	-3.68559	0.00125	0.085062
lnp1	NC_007117.6:36818969-36841477	control	15	OK	1.71669	0.571373	-1.58712	-3.04775	0.0047	0.202031
LOC100000241	NC_007126.6:106077-117206	control	15	OK	4.75603	1.39473	-1.76978	-4.32506	5e-05	0.00654421
LOC100000332	NC_007118.6:19987953-19989411	control	15	OK	3.20941	8.61193	1.42403	3.37242	0.00165	0.102065
LOC100000365	NC_007134.6:677709-692146	control	15	OK	2.37372	0.706326	-1.74874	-3.67659	0.00035	0.0331638
LOC100000576	NC_007118.6:41121414-41140098	control	15	OK	2.79	1.26074	-1.14599	-2.48423	0.0083	0.295471
LOC100000685	NC_007132.6:45635499-45646161	control	15	OK	1.32938	0.34907	-1.92916	-3.47049	0.00135	0.0893488
LOC100000783	NC_007118.6:6226173-6226637	control	15	OK	0	0.704816	inf	#NAME?	0.0086	0.300948
LOC100000832	NC_007118.6:19560857-19575280	control	15	OK	2.37633	6.49303	1.45016	4.12036	5e-05	0.00654421
LOC100000862	NC_007112.6:53402766-53403770	control	15	OK	95.9278	155.741	0.699131	2.29406	0.02255	0.510844
LOC100001887	NC_007122.6:11613448-11722515	control	15	OK	4.88859	2.19727	-1.1537	-2.60701	0.0032	0.158021
LOC100001960,tln2a	NC_007118.6:29579433-29674895	control	15	OK	6.52846	3.30446	-0.98233	-3.12294	0.0014	0.0910234
LOC100002026	NC_007120.6:54167055-54183246	control	15	OK	2.274	1.38101	-0.719507	-1.97375	0.0444	0.701336
LOC100002043	NC_007126.6:46093237-46100289	control	15	OK	11.4137	27.1031	1.24769	3.61281	0.0004	0.0363284
LOC100002045	NC_007112.6:44282521-44296193	control	15	OK	0.961846	0.210719	-2.19049	-3.44647	0.00285	0.146955
LOC100002059	NC_007126.6:17665557-17682773	control	15	OK	2.56364	0.974734	-1.39511	-3.48482	0.0008	0.0609558
LOC100002104	NC_007126.6:595662-608436	control	15	OK	1.2444	0.0909278	-3.77458	-3.39143	0.0101	0.326244
LOC100002181,wu:fe11b02,zgc:110434	NC_007118.6:6324684-6331711	control	15	OK	0.455409	2.06298	2.17949	2.31328	0.0213	0.496006
LOC100002182	NC_007119.6:19480783-19488270	control	15	OK	5.15656	8.46877	0.715743	2.04348	0.03985	0.671257
LOC100002392	NW_003337066.1:9166-10537	control	15	OK	0.335887	1.44318	2.10321	2.52571	0.03905	0.664334
LOC100002566	NC_007132.6:10736158-10754293	control	15	OK	4.10047	8.26304	1.01088	2.90707	0.0038	0.1761
LOC100003669	NC_007122.6:27831468-27832539	control	15	OK	8.80143	15.9522	0.857944	2.16085	0.0363	0.641392
LOC100003714	NC_007114.6:60441391-60491445	control	15	OK	93.2696	38.195	-1.28802	-4.00879	5e-05	0.00654421
LOC100004171,LOC100004336,LOC100006146,LOC101884412,LOC103908687,LOC563490	NC_007118.6:5783458-5791843	control	15	OK	0.567195	2.41153	2.08803	1.9114	0.03555	0.634868
LOC100004357	NC_007129.6:50092408-50103544	control	15	OK	6.49123	2.43819	-1.41268	-3.40535	0.00135	0.0893488
LOC100004528	NC_007126.6:46129192-46140440	control	15	OK	7.73314	14.3921	0.896156	2.47265	0.01075	0.335748
LOC100004850	NC_007114.6:51644851-51789600	control	15	OK	3.00845	1.86445	-0.690269	-2.0006	0.03925	0.665473
LOC100005101	NC_007116.6:11565434-11593412	control	15	OK	1.46112	0.487699	-1.58301	-2.47263	0.01395	0.397082
LOC100005927	NC_007120.6:535492-549687	control	15	OK	0.671305	1.37958	1.03919	2.16008	0.02575	0.543755
LOC100006305	NC_007113.6:45843539-46137464	control	15	OK	1.88665	0.87468	-1.109	-2.3799	0.0187	0.464502
LOC100006428	NC_007114.6:32003173-32004601	control	15	OK	1.20031	25.3475	4.40036	7.90325	5e-05	0.00654421
LOC100006777	NC_007121.6:21554289-21563618	control	15	OK	3.98734	2.20179	-0.856751	-2.33404	0.02235	0.507957
LOC100007086	NC_007114.6:32394565-32399040	control	15	OK	661.078	290.392	-1.18682	-2.82907	0.0039	0.178373
LOC100007087	NC_007118.6:24778387-24786988	control	15	OK	0.194844	0.773722	1.98949	2.51612	0.01265	0.372965
LOC100007493	NC_007130.6:25168288-25173877	control	15	OK	1.29146	2.96184	1.19749	2.54836	0.0105	0.330743
LOC100007608	NC_007112.6:58393743-58411685	control	15	OK	9.04772	5.83635	-0.632488	-1.97914	0.04285	0.694235
LOC100007791	NC_007115.6:37523476-37539923	control	15	OK	1.50427	2.85804	0.925959	2.08105	0.0392	0.665473
LOC100007939	NC_007118.6:57051295-57076334	control	15	OK	0.831657	0.342036	-1.28184	-1.97033	0.03655	0.643212
LOC100147988	NC_007114.6:51405478-51423758	control	15	OK	0.848087	0.121991	-2.79744	-1.48174	0.048	0.721112
LOC100148329	NC_007134.6:21528602-21530391	control	15	OK	10.796	18.3165	0.762644	2.38502	0.01935	0.473261
LOC100148591,LOC100329423,LOC100329560,LOC569982	NC_007118.6:73594838-73602690	control	15	OK	1.96041	9.65935	2.30077	4.93074	5e-05	0.00654421
LOC100148752	NC_007112.6:56010925-56028058	control	15	OK	2.36856	0.332026	-2.83464	-4.1331	0.0016	0.0998545
LOC100149066	NC_007134.6:21535469-21537237	control	15	OK	6.49314	11.3031	0.799731	2.33249	0.01985	0.479461
LOC100149227	NC_007112.6:56037143-56054303	control	15	OK	1.05307	3.10769	1.56123	2.96625	0.00555	0.226209
LOC100149931	NW_003334077.1:35558-37461	control	15	OK	0.825779	1.96117	1.24788	2.40353	0.02265	0.51162
LOC100149940	NC_007133.6:6602783-6621730	control	15	OK	7.86953	13.0701	0.731921	2.22076	0.0248	0.534823
LOC100150043	NC_007123.6:34984595-34994514	control	15	OK	3.44087	1.63182	-1.07629	-2.54484	0.009	0.308019
LOC100150811	NC_007124.6:18975492-19028487	control	15	OK	0.532296	2.19507	2.04397	3.06762	0.0126	0.372746
LOC100329262,LOC103909539	NC_007133.6:6919705-6938836	control	15	OK	1.74676	10.0443	2.52362	5.13452	5e-05	0.00654421
LOC100329304	NC_007114.6:6806528-6833462	control	15	OK	1.48176	3.68896	1.3159	2.71881	0.0086	0.300948
LOC100329483	NC_007125.6:955097-958614	control	15	OK	1.46118	0.556906	-1.39163	-2.44845	0.0241	0.526867
LOC100329520	NC_007117.6:59559335-59568802	control	15	OK	1.45061	0.802977	-0.853227	-1.887	0.04935	0.728363
LOC100329862	NC_007125.6:11916561-12001538	control	15	OK	7.08128	2.86233	-1.30682	-3.63593	0.0001	0.0119493
LOC100329887,crygm2d13	NC_007120.6:22280286-22377137	control	15	OK	861.618	235.125	-1.87362	-2.61036	0.0151	0.413349
LOC100330105	NC_007125.6:46418916-46436348	control	15	OK	2.19392	4.05796	0.887246	2.09252	0.02815	0.568382
LOC100330305	NC_007125.6:51607531-51637763	control	15	OK	2.30297	0.937602	-1.29645	-2.90795	0.00535	0.220237
LOC100330405	NC_007127.6:46551392-46558329	control	15	OK	5.47833	13.0334	1.2504	3.63359	0.00045	0.0399878
LOC100330435	NC_007131.6:53601944-53669497	control	15	OK	10.076	17.1258	0.765252	2.35089	0.0202	0.484572
LOC100330565	NC_007128.6:15749274-15769978	control	15	OK	1.05715	0.393279	-1.42655	-2.40037	0.02385	0.524678
LOC100330598	NC_007116.6:1732439-1734123	control	15	OK	80.8273	127.059	0.652582	2.1384	0.03465	0.6289
LOC100330638	NC_007112.6:58648716-58695471	control	15	OK	3.27791	5.70152	0.798569	2.58457	0.0102	0.326244
LOC100330690	NC_007124.6:19029296-19034252	control	15	OK	0.639483	2.46293	1.9454	3.29447	0.00345	0.166034
LOC100330754	NC_007134.6:5529836-5562281	control	15	OK	5.10891	2.07204	-1.30196	-3.1945	0.00205	0.117277
LOC100330861	NC_007129.6:50947770-50953013	control	15	OK	1.32888	0.0513022	-4.69504	-3.70111	0.04435	0.701336
LOC100330886	NC_007130.6:5562092-5682868	control	15	OK	2.23131	1.30914	-0.769268	-2.05324	0.0326	0.609872
LOC100330916	NC_007112.6:58699797-58805059	control	15	OK	0.261264	0.89065	1.76935	5.25189	5e-05	0.00654421
LOC100330952	NC_007120.6:54369525-54481671	control	15	OK	3.89128	1.57122	-1.30836	-3.06342	0.0016	0.0998545
LOC100331199	NC_007117.6:54753032-54788060	control	15	OK	0.723542	0.185045	-1.9672	-1.39757	0.0455	0.708002
LOC100331349	NC_007121.6:45542221-45569500	control	15	OK	4.0686	2.17896	-0.900893	-2.20347	0.0312	0.597734
LOC100331378,zgc:174938	NC_007127.6:46601637-46621441	control	15	OK	28.6821	55.8588	0.961635	3.09154	0.00155	0.097868
LOC100331439	NC_007122.6:43126166-43165145	control	15	OK	4.70302	7.71551	0.714174	2.10395	0.0318	0.604105
LOC100331557	NC_007124.6:9691417-9706993	control	15	OK	83.3731	13.304	-2.64772	-8.09051	5e-05	0.00654421
LOC100331761	NC_007125.6:45542986-45547037	control	15	OK	0.609986	1.82752	1.58304	2.4883	0.01715	0.443298
LOC100331776	NC_007133.6:20696293-20722188	control	15	OK	44.3205	22.311	-0.990216	-2.76516	0.0052	0.21648
LOC100331800	NC_007128.6:39924421-39939531	control	15	OK	1.53083	0.308359	-2.31163	-4.20351	0.00035	0.0331638
LOC100331956,LOC100333837	NC_007124.6:1665191-1738232	control	15	OK	2.74922	1.10544	-1.31441	-3.05306	0.0014	0.0910234
LOC100331980	NC_007135.6:38668821-38710009	control	15	OK	1.09154	0.498223	-1.1315	-2.1251	0.03465	0.6289
LOC100331984	NC_007120.6:50077530-50096283	control	15	OK	1.14516	2.27257	0.988774	2.2205	0.0255	0.541743
LOC100331996	NC_007113.6:14340943-14343695	control	15	OK	1.36847	0.265521	-2.36567	-3.78746	0.0053	0.218951
LOC100332066	NC_007114.6:59560803-59571562	control	15	OK	15.9491	6.4208	-1.31265	-3.46697	0.00035	0.0331638
LOC100332207	NW_003334256.1:4789-25901	control	15	OK	5.60882	2.28905	-1.29295	-3.20342	0.0017	0.104146
LOC100332215	NC_007117.6:25157910-25166615	control	15	OK	3.12349	5.89873	0.917244	2.37515	0.01575	0.422229
LOC100332327,LOC101886855	NC_007118.6:2310798-2355232	control	15	OK	1.98768	7.24038	1.86498	5.25389	5e-05	0.00654421
LOC100332351	NC_007129.6:189933-199026	control	15	OK	8.63529	14.8751	0.784585	2.2558	0.0227	0.511897
LOC100332446	NC_007123.6:44968081-44979129	control	15	OK	3.63549	1.46863	-1.30768	-2.53323	0.01455	0.40672
LOC100332876	NC_007128.6:51272389-51425891	control	15	OK	11.0814	4.02467	-1.46119	-1.42164	0.03295	0.61298
LOC100332943	NC_007134.6:45928379-45954330	control	15	OK	3.64375	1.70453	-1.09605	-2.99465	0.0043	0.19081
LOC100333037,LOC100534674	NC_007118.6:11162367-11343064	control	15	OK	4.03115	1.89342	-1.0902	-2.335	0.01125	0.345357
LOC100333117	NC_007118.6:1313998-1320014	control	15	OK	4.98307	9.1362	0.874559	2.11019	0.03745	0.650872
LOC100333177,keap1b	NC_007117.6:107244-120564	control	15	OK	10.1585	25.2198	1.31187	3.98739	5e-05	0.00654421
LOC100333266	NC_007114.6:6172911-6186042	control	15	OK	1.40759	0.384692	-1.87146	-2.95533	0.00645	0.250498
LOC100333421	NC_007129.6:49416655-49454742	control	15	OK	1.6794	0.750017	-1.16295	-2.74705	0.00745	0.274998
LOC100333605	NC_007131.6:35109754-35149987	control	15	OK	1.50039	0.872906	-0.781435	-2.08791	0.0318	0.604105
LOC100333879,LOC101885715,LOC101885858	NC_007118.6:69489047-69576534	control	15	OK	4.85062	9.55303	0.97779	2.26566	0.01475	0.40833
LOC100333916	NC_007113.6:58765800-58785277	control	15	OK	28.6247	13.9477	-1.03724	-3.2921	0.0005	0.0436552
LOC100334082	NC_007112.6:55990199-55995108	control	15	OK	12.345	0.817716	-3.91619	-8.8144	5e-05	0.00654421
LOC100334085	NC_007130.6:1381880-1397067	control	15	OK	3.7556	1.9454	-0.948974	-2.3436	0.0223	0.507479
LOC100334171	NC_007130.6:684687-704132	control	15	OK	0.79478	0.183603	-2.11397	-2.82047	0.02095	0.492111
LOC100334344	NC_007125.6:38445833-38453627	control	15	OK	384.42	855.108	1.15342	3.08214	0.0028	0.145341
LOC100334705	NC_007125.6:20924940-20932906	control	15	OK	1.09051	2.82183	1.37163	2.26794	0.0198	0.478748
LOC100334869,LOC100334934,LOC562770,zgc:163061	NC_007118.6:73622106-73631352	control	15	OK	1.50801	5.07601	1.75105	2.75593	0.0048	0.20482
LOC100334881	NC_007112.6:13778523-13798585	control	15	OK	1.45547	0.799792	-0.863788	-2.13214	0.03445	0.627058
LOC100334937	NC_007128.6:50887006-50891833	control	15	OK	12.9188	7.88976	-0.711415	-2.23983	0.02185	0.501147
LOC100335008	NW_003337130.1:39193-63648	control	15	OK	1.84853	0.330205	-2.48494	-3.87922	0.0022	0.123537
LOC100534741	NC_007125.6:40507152-40536969	control	15	OK	2.27599	0.472698	-2.26751	-4.61561	0.00015	0.0170511
LOC100534809	NC_007128.6:26524753-26534794	control	15	OK	1.22397	0.435519	-1.49075	-1.92606	0.039	0.664129
LOC100534875	NW_003334203.1:12813-18469	control	15	OK	0.596157	0.226535	-1.39596	-2.19819	0.04305	0.695224
LOC100535050	NW_003337184.1:63-8444	control	15	OK	5.62865	3.50933	-0.681594	-2.18051	0.0313	0.598831
LOC100535167	NC_007129.6:7625546-7628355	control	15	OK	0.911493	3.86283	2.08336	2.83322	0.0242	0.528228
LOC100535198	NC_007122.6:44199948-44210587	control	15	OK	1.37658	0.65873	-1.06333	-2.05896	0.048	0.721112
LOC100535237	NW_003337006.1:3219-5673	control	15	OK	1.60384	0.47855	-1.74479	-2.27784	0.04055	0.677831
LOC100535278	NC_007124.6:45572701-45638265	control	15	OK	1.06792	0.0682848	-3.9671	-5.68188	0.002	0.115075
LOC100535301,LOC103909295	NC_007112.6:51737505-51748508	control	15	OK	1.41409	7.53969	2.41463	6.34197	5e-05	0.00654421
LOC100535312	NC_007120.6:21391493-21394732	control	15	OK	2.80635	1.54023	-0.865548	-1.95514	0.04225	0.691717
LOC100535324,tmem237a	NC_007120.6:13711096-13757734	control	15	OK	3.44014	1.03404	-1.73418	-3.24137	0.00135	0.0893488
LOC100535442	NC_007116.6:56693875-56702503	control	15	OK	0.393765	1.72337	2.12983	2.56928	0.02365	0.521589
LOC100535472	NC_007114.6:51162571-51192333	control	15	OK	8.16505	16.7557	1.03712	3.27417	0.00155	0.097868
LOC100535571	NC_007130.6:25398170-25404387	control	15	OK	1.17854	0.283695	-2.05459	-2.80426	0.011	0.341273
LOC100535586	NC_007133.6:38028950-38044150	control	15	OK	12.8753	2.48593	-2.37275	-5.55064	5e-05	0.00654421
LOC100535588	NC_007115.6:16061929-16070689	control	15	OK	0	0.773901	inf	#NAME?	0.00515	0.215295
LOC100535622	NW_003336678.1:28625-32061	control	15	OK	6.53335	23.5651	1.85076	4.91545	5e-05	0.00654421
LOC100535657	NC_007125.6:12729957-12742771	control	15	OK	18.2062	75.5198	2.05243	4.15674	5e-05	0.00654421
LOC100535713	NC_007117.6:65810-83639	control	15	OK	3.8301	1.63476	-1.2283	-2.55671	0.00835	0.296197
LOC100535731	NC_007124.6:51565529-51573017	control	15	OK	2.81298	0.288118	-3.28736	-3.60885	0.0152	0.414144
LOC100535760	NC_007121.6:1954921-1962828	control	15	OK	13.6457	2.49434	-2.45171	-6.9668	5e-05	0.00654421
LOC100535812	NC_007113.6:5822329-5864109	control	15	OK	4.43342	2.63412	-0.751098	-2.26901	0.0214	0.496518
LOC100535848	NC_007114.6:58324564-58363734	control	15	OK	4.24793	2.16089	-0.975135	-2.34506	0.01795	0.453432
LOC100535946	NC_007136.6:10905743-10917295	control	15	OK	0.574718	1.50643	1.39021	1.74061	0.03385	0.621794
LOC100536033	NC_007131.6:12559249-12561754	control	15	OK	2.47271	38.5539	3.96271	9.81283	5e-05	0.00654421
LOC100536055	NC_007128.6:6232185-6270790	control	15	OK	1.24336	0.686579	-0.856741	-2.22959	0.02165	0.499505
LOC100536295	NC_007127.6:16713264-16741796	control	15	OK	3.66884	0.1936	-4.24418	-9.05336	5e-05	0.00654421
LOC100536415	NC_007113.6:56814406-56845348	control	15	OK	17.0275	42.6353	1.32418	3.85488	0.00025	0.0256683
LOC100536600	NC_007127.6:50355421-50363604	control	15	OK	1.32732	4.57492	1.78523	4.28194	5e-05	0.00654421
LOC100536666	NC_007126.6:12479736-12484691	control	15	OK	5.03818	14.5079	1.52586	3.88913	0.0004	0.0363284
LOC100536698	NW_003336894.1:18962-40386	control	15	OK	1.58698	4.29448	1.4362	2.87248	0.00795	0.287246
LOC100536813,wu:fb18f06	NC_007126.6:46141942-46199252	control	15	OK	223.516	598.727	1.42152	4.30889	5e-05	0.00654421
LOC100536887	NW_003336908.1:1195-7931	control	15	OK	4.22505	40.9411	3.27651	8.94367	5e-05	0.00654421
LOC100536895	NC_007126.6:42787945-42804281	control	15	OK	0.571028	1.23794	1.11631	2.37749	0.0233	0.517619
LOC100536977	NC_007135.6:33373811-33377359	control	15	OK	10.727	17.3003	0.689551	2.09177	0.0365	0.643212
LOC100537037	NC_007127.6:22211868-22218318	control	15	OK	0	0.646461	inf	#NAME?	0.0007	0.0554481
LOC100537109	NC_007125.6:33519773-33531963	control	15	OK	2.26759	0.952147	-1.2519	-2.34023	0.0251	0.537321
LOC100537138	NC_007117.6:156252-162063	control	15	OK	3.30893	7.01866	1.08483	3.0573	0.0039	0.178373
LOC100537178	NC_007126.6:3964196-4329868	control	15	OK	1.93508	8.44734	2.1261	2.33159	0.0359	0.637865
LOC100537181,si:dkey-30j22.4	NC_007131.6:35642068-35655420	control	15	OK	0.740523	2.02608	1.45208	2.39869	0.0103	0.326499
LOC100537244	NW_003334319.1:126257-146779	control	15	OK	17.8931	8.97622	-0.995223	-2.59813	0.0111	0.342705
LOC100537272	NC_007132.6:48834-65146	control	15	OK	0.235345	0.764195	1.69916	3.1853	0.00545	0.223565
LOC100537292	NC_007123.6:24909010-24924525	control	15	OK	0.410206	0.795161	0.954899	2.16664	0.0327	0.610438
LOC100537295	NC_007113.6:329763-331721	control	15	OK	179.897	85.1935	-1.07835	-3.5005	0.0005	0.0436552
LOC100537437	NC_007114.6:561964-566673	control	15	OK	2.06219	0.620484	-1.73271	-2.59475	0.02485	0.535407
LOC100537515	NC_007118.6:2212873-2239688	control	15	OK	25.4374	51.3398	1.01312	3.24234	0.0008	0.0609558
LOC100537594	NC_007133.6:298856-322083	control	15	OK	1.53074	0.486453	-1.65386	-3.30568	0.00315	0.156879
LOC100537679	NC_007123.6:49165604-49168605	control	15	OK	8.28804	3.03672	-1.44852	-3.10018	0.00345	0.166034
LOC100537703,LOC101886960	NC_007131.6:44892689-45417321	control	15	OK	5.6927	3.22831	-0.818333	-2.23201	0.01725	0.44408
LOC100537733	NC_007114.6:58806371-58817730	control	15	OK	0.799959	2.25058	1.4923	2.79987	0.01105	0.341764
LOC100537765	NW_008805526.1:25640-36636	control	15	OK	0.85261	2.85652	1.7443	3.43702	0.0012	0.0822993
LOC100537793	NC_007128.6:47001543-47006925	control	15	OK	0.945515	0.416485	-1.18284	-2.33792	0.0272	0.55969
LOC100537796	NC_007113.6:44512478-44519376	control	15	OK	0.254175	0.914127	1.84657	1.97745	0.03635	0.641466
LOC100538016	NC_007127.6:24903372-24917189	control	15	OK	2.39946	8.24981	1.78165	4.21461	0.0001	0.0119493
LOC100538072	NC_007113.6:53253661-53311372	control	15	OK	1.30078	3.83266	1.55897	3.37122	0.00185	0.109875
LOC100538125	NC_007119.6:53464347-53484950	control	15	OK	0.790081	0.312891	-1.33634	-2.50601	0.0194	0.474152
LOC100538174	NC_007116.6:47458640-47527541	control	15	OK	23.2846	37.499	0.687472	1.94602	0.04945	0.728363
LOC100538182	NC_007118.6:23696177-23725247	control	15	OK	3.24178	1.84729	-0.811371	-2.03164	0.0411	0.68117
LOC100538256	NC_007117.6:1310437-1315249	control	15	OK	0.405174	1.06589	1.39544	2.06533	0.048	0.721112
LOC100538267	NC_007118.6:6427436-6468785	control	15	OK	2.11243	0.480254	-2.13704	-4.36991	0.0005	0.0436552
LOC100538287	NC_007118.6:10346712-10366268	control	15	OK	13.9771	35.3312	1.33788	3.60337	0.0006	0.0496031
LOC100538303	NC_007112.6:44414891-44435473	control	15	OK	2.87561	5.74384	0.998144	3.15521	0.00135	0.0893488
LOC101882012	NW_003336647.1:21444-37852	control	15	OK	1.04477	3.15792	1.59578	2.9422	0.0083	0.295471
LOC101882069	NC_007132.6:25597491-25611154	control	15	OK	3.07445	1.81238	-0.762442	-2.13801	0.03655	0.643212
LOC101882119	NC_007127.6:17255424-17280285	control	15	OK	0.717617	0.268162	-1.42011	-1.95261	0.0486	0.726076
LOC101882290	NC_007118.6:1841304-1842267	control	15	OK	3.53699	22.4997	2.66931	6.52999	5e-05	0.00654421
LOC101882318	NC_007128.6:48395033-48401752	control	15	OK	0.581093	0	#NAME?	#NAME?	0.00315	0.156879
LOC101882328,myh7bb	NC_007134.6:18795382-18831025	control	15	OK	6.73766	3.85552	-0.805323	-2.48617	0.01115	0.343039
LOC101882443	NC_007113.6:15289675-15302364	control	15	OK	0.888575	1.72003	0.952866	2.06831	0.0409	0.679948
LOC101882445	NC_007121.6:6039351-6049593	control	15	OK	0.4949	1.11	1.16535	2.59579	0.0113	0.346588
LOC101882446	NC_007115.6:7537153-7541187	control	15	OK	1.6725	4.44835	1.41127	2.30005	0.0321	0.60664
LOC101882481	NC_007131.6:23295407-23303270	control	15	OK	0.549972	0.180339	-1.60864	-3.08156	0.00625	0.245729
LOC101882555	NC_007135.6:37023112-37033375	control	15	OK	1.71202	0.814597	-1.07154	-2.13691	0.0287	0.575175
LOC101882582	NC_007114.6:8281019-8281991	control	15	OK	1.69218	0.144259	-3.55215	-2.74684	0.0444	0.701336
LOC101882711	NW_003337109.1:29917-36936	control	15	OK	0	1.582	inf	#NAME?	0.0086	0.300948
LOC101882797	NC_007121.6:43671440-43711708	control	15	OK	5.83886	13.0458	1.15983	2.37759	0.0204	0.486039
LOC101882918	NC_007112.6:7426433-7480574	control	15	OK	6.18853	10.8246	0.806646	2.54642	0.0101	0.326244
LOC101882994	NC_007124.6:15444719-15446565	control	15	OK	0	0.682094	inf	#NAME?	0.0172	0.443771
LOC101883130	NC_007127.6:13734915-13772644	control	15	OK	2.41242	1.1492	-1.06986	-3.00235	0.00405	0.183318
LOC101883187,LOC571321	NC_007115.6:71560966-71577596	control	15	OK	0.815536	0.190593	-2.09725	-1.99699	0.00235	0.128961
LOC101883293	NC_007126.6:44202621-44232652	control	15	OK	0.988715	3.04804	1.62425	3.07683	0.0037	0.172493
LOC101883393,slc6a11	NC_007122.6:1064112-1106528	control	15	OK	26.2835	13.0131	-1.01419	-2.07137	0.0231	0.516783
LOC101883456	NC_007114.6:59820109-59831723	control	15	OK	0.752155	1.47773	0.974284	2.00901	0.0431	0.69539
LOC101883516	NC_007122.6:14947908-14949562	control	15	OK	0.845322	0	#NAME?	#NAME?	0.04735	0.717194
LOC101883538	NC_007136.6:1355591-1379906	control	15	OK	1.90252	0.751993	-1.33912	-2.2924	0.0308	0.593481
LOC101883586	NW_003336449.1:81-13868	control	15	OK	0.696852	0	#NAME?	#NAME?	0.02325	0.517001
LOC101883588	NW_003336858.1:5549-5983	control	15	OK	0.831774	0	#NAME?	#NAME?	0.02325	0.517001
LOC101883648	NC_007133.6:5323881-5328882	control	15	OK	0.777465	0.159257	-2.28742	-2.1429	0.02355	0.520202
LOC101883708,phf20l1	NC_007127.6:31640995-31670259	control	15	OK	18.9094	32.0067	0.759265	2.11957	0.0307	0.592695
LOC101883751	NC_007129.6:29984243-29989681	control	15	OK	4.11433	2.36531	-0.798629	-2.23202	0.0227	0.511897
LOC101883852	NC_007121.6:384586-400395	control	15	OK	1.57553	0.773474	-1.02641	-2.14085	0.0291	0.578071
LOC101883856	NC_007129.6:5986159-6003023	control	15	OK	1.00823	2.14311	1.08787	2.44548	0.01575	0.422229
LOC101883905	NC_007121.6:35594113-35598075	control	15	OK	12.3047	7.60554	-0.694088	-2.24998	0.02735	0.560963
LOC101884022	NC_007132.6:1485767-1493651	control	15	OK	9.75996	16.8272	0.785852	2.43188	0.01275	0.375439
LOC101884025	NW_003337033.1:5986-42745	control	15	OK	2.13669	4.67379	1.12921	2.58545	0.00945	0.31737
LOC101884053	NC_007115.6:45934047-46048197	control	15	OK	1.2476	2.33181	0.902294	1.98436	0.047	0.714986
LOC101884058	NC_007126.6:32849735-32851470	control	15	OK	0.553881	0	#NAME?	#NAME?	0.00415	0.186041
LOC101884241	NC_007122.6:43706647-43795007	control	15	OK	1.70772	1.02903	-0.730785	-1.99647	0.0409	0.679948
LOC101884267	NC_007126.6:42188671-42193037	control	15	OK	6.47195	0	#NAME?	#NAME?	0.00045	0.0399878
LOC101884282	NW_003337125.1:39185-40736	control	15	OK	0.356051	2.31189	2.69892	2.81074	0.0155	0.418733
LOC101884293	NC_007122.6:44264949-44281050	control	15	OK	4.49715	2.74718	-0.711058	-2.10312	0.03525	0.633063
LOC101884333	NC_007115.6:49739778-49748671	control	15	OK	0.757631	10.1995	3.75086	2.79422	0.00675	0.258564
LOC101884355	NC_007115.6:403243-563075	control	15	OK	0	0.570516	inf	#NAME?	0.00605	0.240841
LOC101884375	NC_007115.6:60902611-60904555	control	15	OK	1.36785	0	#NAME?	#NAME?	0.04305	0.695224
LOC101884382	NC_007133.6:2173076-2195010	control	15	OK	0.539299	0.000304836	-10.7888	-0.102047	0.0162	0.429849
LOC101884384	NC_007113.6:40694141-40695725	control	15	OK	19.5267	70.5171	1.85252	2.28651	0.04675	0.713042
LOC101884387	NC_007123.6:13699984-13701472	control	15	OK	0	1.38081	inf	#NAME?	0.01325	0.384981
LOC101884463	NC_007115.6:47018875-47020470	control	15	OK	0.25178	1.97478	2.97145	3.87978	0.0101	0.326244
LOC101884521	NC_007115.6:69127196-69131725	control	15	OK	6.04026	28.5765	2.24215	2.2685	0.0494	0.728363
LOC101884570	NC_007116.6:31529083-31533293	control	15	OK	1.40587	2.71845	0.951323	1.96701	0.04765	0.719094
LOC101884623	NC_007136.6:12823092-12826985	control	15	OK	3.23237	7.78027	1.26723	2.11945	0.0423	0.691727
LOC101884625	NC_007118.6:17530607-17551354	control	15	OK	4.13571	2.39676	-0.787052	-2.26083	0.01895	0.467396
LOC101884694	NC_007135.6:35221839-35246975	control	15	OK	12.3563	6.92432	-0.835499	-2.40712	0.01675	0.437644
LOC101884706	NC_007114.6:24352251-24374666	control	15	OK	5.79863	3.08451	-0.910668	-2.74589	0.00445	0.19463
LOC101884755	NC_007131.6:1980831-1995717	control	15	OK	0.274072	1.70635	2.63828	2.91599	0.02595	0.545675
LOC101884857,zgc:112965	NC_007114.6:10762426-10784949	control	15	OK	1.61105	0.468684	-1.78131	-3.59848	0.0008	0.0609558
LOC101884884	NC_007115.6:45868814-45882851	control	15	OK	0.415262	1.29241	1.63797	2.78622	0.01075	0.335748
LOC101884954	NC_007129.6:7610465-7613482	control	15	OK	3.85501	70.3472	4.18969	11.1429	5e-05	0.00654421
LOC101884960	NC_007113.6:58898506-58916391	control	15	OK	6.13563	2.53727	-1.27393	-2.22376	0.0347	0.629155
LOC101885014	NC_007124.6:42146454-42180335	control	15	OK	1.96724	0.70571	-1.47902	-2.87332	0.0077	0.281261
LOC101885039	NC_007132.6:3812961-3868028	control	15	OK	3.9338	1.85551	-1.08411	-2.59861	0.0088	0.305504
LOC101885045	NC_007125.6:6814214-6822486	control	15	OK	6.2342	2.04817	-1.60587	-5.0378	5e-05	0.00654421
LOC101885051	NC_007115.6:42267509-42269841	control	15	OK	3.91769	0.47127	-3.05538	-1.25799	0.04835	0.724505
LOC101885157,LOC103909139	NC_007129.6:24750854-24754075	control	15	OK	0.111479	0.644464	2.53133	0.539976	0.01515	0.413909
LOC101885172,vwa5b1	NC_007134.6:37015695-37119060	control	15	OK	1.00319	0.387708	-1.37155	-2.14005	0.03385	0.621794
LOC101885206	NW_003335359.2:76302-79537	control	15	OK	0.187001	0.554807	1.56894	2.28701	0.0383	0.65813
LOC101885231	NC_007131.6:52636697-52646932	control	15	OK	4.17917	2.18787	-0.933688	-2.00458	0.0319	0.604856
LOC101885256	NC_007113.6:58996785-59019581	control	15	OK	10.0496	28.0857	1.4827	3.86747	0.0005	0.0436552
LOC101885337	NW_001878118.4:55114-56577	control	15	OK	0	0.643255	inf	#NAME?	0.0218	0.500821
LOC101885345	NC_007114.6:5536970-5549714	control	15	OK	0.0794285	0.519679	2.70989	1.65292	0.02325	0.517001
LOC101885450	NC_007113.6:1055729-1061469	control	15	OK	1.78695	0.592897	-1.59165	-2.46757	0.02325	0.517001
LOC101885490	NC_007133.6:28957194-28974442	control	15	OK	0	1.42228	inf	#NAME?	0.0188	0.465006
LOC101885496	NC_007115.6:31983535-31986918	control	15	OK	0	0.74878	inf	#NAME?	0.00055	0.0465129
LOC101885510	NC_007136.6:8441589-8442545	control	15	OK	5.76365	17.538	1.60543	2.58195	0.01675	0.437644
LOC101885512	NC_007115.6:4592909-4603253	control	15	OK	3.42232	18.9444	2.46873	6.36877	5e-05	0.00654421
LOC101885514	NC_007123.6:315445-328914	control	15	OK	0.992156	0.141632	-2.80842	-3.7118	0.00895	0.307359
LOC101885646	NC_007129.6:17792186-17796622	control	15	OK	0.935402	0.396197	-1.23937	-2.38766	0.0182	0.456945
LOC101885776	NW_003334027.1:1764-5984	control	15	OK	3.39651	6.75534	0.991974	2.24931	0.0264	0.551001
LOC101885790	NC_007134.6:6397109-6466254	control	15	OK	1.2314	0.368719	-1.73971	-1.97229	0.0152	0.414144
LOC101885813	NC_007115.6:5912534-5960899	control	15	OK	0.882353	7.8766	3.15814	3.19855	0.02275	0.511897
LOC101885994	NC_007123.6:15960173-15966633	control	15	OK	1.61104	0.291349	-2.46717	-5.41839	5e-05	0.00654421
LOC101886033	NC_007131.6:54675788-54680758	control	15	OK	4.12047	1.02896	-2.00162	-4.1563	0.00045	0.0399878
LOC101886088	NC_007115.6:29973427-29979644	control	15	OK	1.95678	0.77623	-1.33393	-2.33612	0.0288	0.576354
LOC101886109	NC_007130.6:9748070-9764091	control	15	OK	2.48431	5.86455	1.23917	3.13122	0.002	0.115075
LOC101886120	NC_007122.6:17003948-17007127	control	15	OK	0	0.541081	inf	#NAME?	5e-05	0.00654421
LOC101886133,LOC798445	NC_007121.6:42328845-42351028	control	15	OK	4.29058	8.21962	0.9379	1.96547	0.04645	0.711722
LOC101886142,LOC103911298	NC_007118.6:786397-816012	control	15	OK	0.821767	5.49512	2.74135	2.89251	0.001	0.0721887
LOC101886194	NC_007119.6:7798917-7812803	control	15	OK	2.8218	0.923143	-1.61199	-2.30009	0.02485	0.535407
LOC101886267	NC_007128.6:49136849-49197333	control	15	OK	2.08975	1.17577	-0.829721	-1.94046	0.0442	0.701336
LOC101886327	NC_007135.6:29574771-29607178	control	15	OK	5.04395	2.07143	-1.28392	-2.97446	0.0037	0.172493
LOC101886340	NC_007112.6:58224772-58242961	control	15	OK	9.06213	2.8443	-1.67178	-2.41154	0.02495	0.535748
LOC101886347	NC_007112.6:18249869-18253914	control	15	OK	0.307015	1.25588	2.03231	3.07808	0.00595	0.238487
LOC101886389	NC_007126.6:45650351-45659290	control	15	OK	2.21741	0.322904	-2.7797	-5.44513	0.0001	0.0119493
LOC101886435	NC_007134.6:33851135-33975673	control	15	OK	1.87648	0.919054	-1.02981	-2.18427	0.023	0.51504
LOC101886442	NC_007123.6:2345054-2356319	control	15	OK	2.15711	0.874065	-1.30329	-3.46031	0.00065	0.0528629
LOC101886485	NC_007118.6:8754807-8757412	control	15	OK	1.88632	4.39555	1.22047	2.5071	0.0172	0.443771
LOC101886492	NC_007119.6:39004419-39011824	control	15	OK	0.996922	0	#NAME?	#NAME?	0.02325	0.517001
LOC101886550	NC_007122.6:17771833-17774077	control	15	OK	0.978695	0	#NAME?	#NAME?	0.0155	0.418733
LOC101886560	NC_007118.6:71795148-71842575	control	15	OK	0.753945	0.271406	-1.47401	-2.30855	0.0291	0.578071
LOC101886597	NW_001884413.3:135290-148088	control	15	OK	0.527563	0	#NAME?	#NAME?	0.04305	0.695224
LOC101886642	NC_007121.6:17108113-17118391	control	15	OK	0.778282	0.163758	-2.24873	-4.01497	0.00055	0.0465129
LOC101886647	NC_007116.6:42464791-42470882	control	15	OK	3.04976	1.15909	-1.3957	-2.78431	0.0055	0.224826
LOC101886654	NW_003336976.1:286-43244	control	15	OK	3.95047	2.08767	-0.920127	-2.24417	0.0296	0.581887
LOC101886684	NC_007135.6:29877179-29900540	control	15	OK	6.59768	0.904985	-2.86599	-5.82984	5e-05	0.00654421
LOC101886726	NC_007133.6:15412267-15477565	control	15	OK	4.58563	2.58722	-0.82572	-2.32362	0.0173	0.444876
LOC101886739	NC_007129.6:8886507-8903024	control	15	OK	0.735088	0.341837	-1.10461	-2.05158	0.04685	0.713634
LOC101886765	NC_007135.6:17134909-17188591	control	15	OK	0.114191	1.1577	3.34174	1.8716	0.0053	0.218951
LOC101886780	NC_007136.6:30746455-30818998	control	15	OK	31.363	13.4631	-1.22005	-2.68642	0.0093	0.314292
LOC101886883	NC_007135.6:5361-9703	control	15	OK	1.05401	0.35591	-1.56631	-1.93975	0.02155	0.498512
LOC101886884	NC_007136.6:36888871-36897985	control	15	OK	10.139	4.29889	-1.23788	-3.32883	0.00155	0.097868
LOC101886887	NC_007115.6:74657457-74667102	control	15	OK	0.228878	2.03714	3.1539	4.96587	0.0015	0.095747
LOC101886901	NC_007116.6:7779780-7827684	control	15	OK	0.255868	1.46589	2.5183	3.86544	0.0047	0.202031
LOC101886946	NW_001884386.4:47272-50016	control	15	OK	0.915151	4.09596	2.16212	3.70315	0.0021	0.119067
LOC101886948	NC_007123.6:20948157-20976617	control	15	OK	0.281272	0.655188	1.21994	0.852819	0.044	0.701336
LOC101886994	NW_008805496.1:297-2909	control	15	OK	7.52169	2.83719	-1.40659	-2.16851	0.03685	0.645248
LOC101887003,cdh1	NC_007118.6:52789080-52847598	control	15	OK	37.038	63.0607	0.767735	2.26272	0.0181	0.455905
LOC101887029,duox	NC_007136.6:31533554-31608344	control	15	OK	2.66611	4.87538	0.870779	2.25712	0.01285	0.377907
LOC101887042	NC_007125.6:13411325-13421305	control	15	OK	2.28938	13.4083	2.5501	7.58155	5e-05	0.00654421
LOC101887080	NC_007135.6:36785932-36832798	control	15	OK	2.83847	1.53283	-0.888911	-1.93344	0.036	0.638831
LOC101887114	NW_003335889.1:433-3185	control	15	OK	5.63166	2.92748	-0.943899	-2.56048	0.01025	0.326244
LOC101887132	NC_007126.6:46073989-46086455	control	15	OK	6.99174	24.7066	1.82117	3.43812	0.00095	0.0695108
LOC103908655	NC_007128.6:50209811-50213039	control	15	OK	1.13768	2.99285	1.39543	2.71808	0.01115	0.343039
LOC103908668,ogg1	NC_007119.6:46378243-46432108	control	15	OK	3.60545	6.32737	0.811426	2.05772	0.03075	0.593481
LOC103908673	NW_003335149.2:30377-32746	control	15	OK	0	0.942469	inf	#NAME?	0.02135	0.49651
LOC103908677	NW_008805497.1:7031-15075	control	15	OK	4.89589	2.28969	-1.09642	-2.59192	0.0126	0.372746
LOC103908826	NC_007126.6:18854270-18855289	control	15	OK	0.626098	0	#NAME?	#NAME?	0.02325	0.517001
LOC103908997	NC_007127.6:54308635-54311037	control	15	OK	8.44085	13.2463	0.650126	2.03192	0.03885	0.662864
LOC103909005	NC_007128.6:4312177-4320617	control	15	OK	0.547415	0	#NAME?	#NAME?	0.00245	0.132068
LOC103909080,LOC565594	NC_007112.6:40871759-40892282	control	15	OK	0.56178	1.61202	1.5208	2.38769	0.0135	0.389658
LOC103909185	NC_007130.6:890330-910726	control	15	OK	10.9984	6.9822	-0.655539	-2.15156	0.03145	0.601043
LOC103909189	NC_007130.6:2635092-2636331	control	15	OK	4.64404	0	#NAME?	#NAME?	0.02025	0.485106
LOC103909204	NC_007130.6:9376332-9421211	control	15	OK	0	0.634424	inf	#NAME?	0.0096	0.320716
LOC103909240	NC_007130.6:29059341-29062947	control	15	OK	0.288436	0.766289	1.40964	1.9246	0.0391	0.6647
LOC103909285	NC_007112.6:51721517-51732259	control	15	OK	0.0545384	2.2738	5.38169	2.86787	0.007	0.264666
LOC103909375	NC_007131.6:54682579-54687339	control	15	OK	2.72937	0.465237	-2.55253	-2.63344	0.0237	0.522362
LOC103909376	NC_007131.6:54880259-54884511	control	15	OK	9.02327	4.87026	-0.88965	-2.22523	0.02575	0.543755
LOC103909417	NC_007132.6:6046440-6053084	control	15	OK	0	0.880893	inf	#NAME?	0.0009	0.0667592
LOC103909489	NC_007132.6:42030990-42035614	control	15	OK	4.70485	2.75059	-0.774408	-2.29328	0.01875	0.465006
LOC103909521	NC_007133.6:5179298-5181226	control	15	OK	2.02716	0.650623	-1.63957	-2.79343	0.0122	0.365546
LOC103909671	NC_007134.6:16352418-16355772	control	15	OK	30.9186	130.553	2.07809	6.6023	5e-05	0.00654421
LOC103909748,LOC569952	NC_007135.6:18545105-18587979	control	15	OK	1.71476	0.688601	-1.31626	-2.55194	0.00935	0.315373
LOC103909761	NC_007135.6:27296290-27300991	control	15	OK	0.350521	4.06386	3.53528	2.92759	0.01615	0.42901
LOC103909767	NC_007135.6:30194930-30216443	control	15	OK	0.701542	0.208119	-1.75312	-2.49328	0.006	0.239942
LOC103909970	NW_008805454.1:14989-40199	control	15	OK	2.87658	1.35142	-1.08988	-2.69894	0.00765	0.280165
LOC103909985	NW_008805483.1:2386-39371	control	15	OK	0.185444	0.569158	1.61785	2.36777	0.03005	0.585473
LOC103909987	NW_008805493.1:2869-5946	control	15	OK	0.439874	1.15204	1.38903	2.56786	0.01545	0.418028
LOC103909999	NW_008805536.1:25-342	control	15	OK	40.9816	111.911	1.44931	3.49703	0.0015	0.095747
LOC103910026	NW_008805569.1:438-37993	control	15	OK	208.947	104.547	-0.998987	-3.13377	0.0016	0.0998545
LOC103910027	NW_008805573.1:31589-38072	control	15	OK	0.145341	0.82114	2.49819	3.0041	0.0174	0.4463
LOC103910109	NC_007113.6:43831060-43834757	control	15	OK	2.33809	4.93728	1.07838	2.64784	0.01085	0.338117
LOC103910189	NC_007114.6:3868851-3892134	control	15	OK	0.454334	0.82892	0.86748	1.96415	0.0486	0.726076
LOC103910207	NC_007114.6:10012290-10013743	control	15	OK	1.29001	4.39866	1.76969	2.53145	0.0279	0.566273
LOC103910232	NC_007114.6:16082708-16084831	control	15	OK	10.4019	16.0769	0.62814	1.98988	0.046	0.71058
LOC103910489	NC_007115.6:33187537-33191555	control	15	OK	7.07206	21.9313	1.63279	2.04493	0.0397	0.669859
LOC103910519	NC_007115.6:34731401-34738665	control	15	OK	0.571736	0	#NAME?	#NAME?	0.0102	0.326244
LOC103910580	NW_003334875.1:3463-12492	control	15	OK	0.651963	0	#NAME?	#NAME?	0.00245	0.132068
LOC103910689	NC_007115.6:46159004-46159705	control	15	OK	4.66571	0	#NAME?	#NAME?	0.00235	0.128961
LOC103910955	NC_007115.6:68211725-68211995	control	15	OK	23.6037	0	#NAME?	#NAME?	0.04735	0.717194
LOC103910964	NC_007115.6:68932768-68942577	control	15	OK	0	1.03491	inf	#NAME?	0.00125	0.085062
LOC103911029	NC_007116.6:439341-440818	control	15	OK	0.941715	0.175165	-2.42658	-2.69515	0.0346	0.628318
LOC103911044	NC_007116.6:7410377-7473352	control	15	OK	2.4255	0.958614	-1.33926	-2.68703	0.00205	0.117277
LOC103911048	NC_007116.6:10462659-10464450	control	15	OK	0	0.552575	inf	#NAME?	0.0218	0.500821
LOC103911051	NW_003335764.1:126500-127745	control	15	OK	0	1.35831	inf	#NAME?	0.0019	0.11087
LOC103911059,lama2	NC_007131.6:1883458-1959818	control	15	OK	4.93672	2.42423	-1.02603	-2.27675	0.0177	0.45053
LOC103911065	NC_007116.6:22526841-22540277	control	15	OK	0.70926	2.14231	1.59478	2.75397	0.0075	0.276552
LOC103911088	NC_007132.6:1466969-1480101	control	15	OK	5.18578	9.4209	0.861303	2.45327	0.0152	0.414144
LOC103911096	NC_007116.6:39293663-39299714	control	15	OK	1.67988	0.708813	-1.24488	-3.06033	0.00335	0.163127
LOC103911179,xirp2a	NC_007117.6:9935707-9998158	control	15	OK	8.63296	3.27133	-1.39998	-3.27633	0.0009	0.0667592
LOC103911241	NC_007117.6:25207487-25227874	control	15	OK	0.0981422	1.33872	3.76983	4.14288	0.0443	0.701336
LOC103911313	NC_007118.6:2199984-2200780	control	15	OK	0	1.05722	inf	#NAME?	0.00155	0.097868
LOC103911343	NC_007118.6:6296357-6297124	control	15	OK	0	0.698153	inf	#NAME?	0.0007	0.0554481
LOC103911422	NC_007118.6:51550477-51551168	control	15	OK	0	1.29972	inf	#NAME?	0.0047	0.202031
LOC103911446,LOC570526	NC_007118.6:69626723-69659599	control	15	OK	10.7777	3.56212	-1.59724	-4.4628	5e-05	0.00654421
LOC103911450	NC_007119.6:235027-239675	control	15	OK	1.48879	0.351476	-2.08265	-2.65457	0.02995	0.584827
LOC103911469	NC_007119.6:10524150-10668290	control	15	OK	0.70043	1.45746	1.05714	1.95094	0.0497	0.730355
LOC103911521	NC_007119.6:31992950-31995579	control	15	OK	0.630486	0	#NAME?	#NAME?	0.04735	0.717194
LOC103911530	NW_003336980.1:8092-9958	control	15	OK	1.51655	0.135212	-3.48749	-3.15572	0.0131	0.382687
LOC103911635	NC_007120.6:20046483-20053440	control	15	OK	0	0.784116	inf	#NAME?	5e-05	0.00654421
LOC103911736	NC_007112.6:180259-181526	control	15	OK	15.9702	27.5841	0.788454	2.44101	0.0148	0.40833
LOC103911773	NC_007121.6:37845390-37926694	control	15	OK	0	0.651143	inf	#NAME?	0.0218	0.500821
LOC103911796	NC_007122.6:222893-232353	control	15	OK	13.4375	20.8882	0.636423	2.07213	0.0378	0.653871
LOC103911810	NC_007122.6:12274966-12616124	control	15	OK	0.268621	1.77847	2.72699	1.85041	0.0448	0.703212
LOC103911834	NC_007122.6:19952713-19962176	control	15	OK	29.881	117.534	1.97578	5.29713	5e-05	0.00654421
LOC103911854	NC_007122.6:34378240-34381406	control	15	OK	0.61215	0	#NAME?	#NAME?	0.00415	0.186041
LOC103911924	NC_007123.6:25332437-25341198	control	15	OK	0.475414	2.18856	2.20273	2.77756	0.027	0.557541
LOC402880	NC_007135.6:28152441-28166708	control	15	OK	8.12595	3.42795	-1.24519	-2.63213	0.0123	0.366503
LOC405768	NC_007117.6:6767391-6807632	control	15	OK	7.56967	2.74776	-1.46197	-3.70346	0.0003	0.0297548
LOC553228	NC_007119.6:52492496-52504188	control	15	OK	1.16071	2.58692	1.15624	2.21475	0.03105	0.596165
LOC553343	NC_007128.6:15440813-15490453	control	15	OK	6.41313	2.76085	-1.21592	-3.59769	0.0003	0.0297548
LOC555438	NC_007115.6:75702774-75710175	control	15	OK	0.604561	1.30044	1.10504	2.29974	0.0282	0.568571
LOC555478	NC_007118.6:15093053-15164803	control	15	OK	4.95602	2.22602	-1.15471	-3.02357	0.0037	0.172493
LOC555713	NC_007114.6:32801977-32820329	control	15	OK	7.66349	11.9215	0.637487	2.05452	0.0364	0.642024
LOC555795	NC_007118.6:45731072-45737495	control	15	OK	28.6411	45.1542	0.656773	2.13505	0.0348	0.629827
LOC555911	NC_007127.6:28969135-29056235	control	15	OK	1.94509	0.773073	-1.33116	-3.06542	0.00365	0.171648
LOC555918,LOC569920	NC_007121.6:424222-453668	control	15	OK	5.85498	3.28159	-0.835269	-2.36192	0.0139	0.396464
LOC556054	NC_007129.6:11537874-11581962	control	15	OK	1.6986	0.641315	-1.40524	-2.81447	0.0089	0.306997
LOC556439	NC_007131.6:20375380-20413154	control	15	OK	6.55323	4.20996	-0.638398	-1.94443	0.04555	0.708002
LOC556551	NC_007122.6:43879001-43912923	control	15	OK	1.66317	0.848313	-0.971269	-2.31262	0.0189	0.466491
LOC556578	NC_007118.6:66613283-66644800	control	15	OK	2.64505	0.697633	-1.92275	-3.91189	0.00025	0.0256683
LOC556668	NC_007135.6:19836616-19872398	control	15	OK	3.16614	1.64069	-0.948424	-2.22676	0.01255	0.372053
LOC557008	NC_007116.6:18973614-18984821	control	15	OK	2.0022	1.01087	-0.985984	-2.03436	0.0495	0.72864
LOC557301	NC_007118.6:52691504-52692436	control	15	OK	1.35198	3.85277	1.51082	2.41668	0.0245	0.531299
LOC557447	NC_007116.6:55355261-55357907	control	15	OK	0.598957	0.147909	-2.01774	-2.68036	0.02185	0.501147
LOC557518	NC_007122.6:36722190-36764941	control	15	OK	10.613	3.20377	-1.72799	-4.91214	5e-05	0.00654421
LOC557642	NC_007120.6:51750032-51963031	control	15	OK	1.73176	0.828813	-1.06312	-2.3639	0.0176	0.449291
LOC558202	NC_007125.6:31525032-31553711	control	15	OK	12.8995	21.6477	0.746902	2.27077	0.02185	0.501147
LOC558797	NC_007128.6:36679465-36734341	control	15	OK	1.3596	0.724038	-0.90905	-1.96477	0.03985	0.671257
LOC558816	NC_007114.6:31997762-31999329	control	15	OK	4.95608	111.624	4.4933	11.3839	5e-05	0.00654421
LOC559232	NC_007129.6:5163275-5167795	control	15	OK	4.72475	1.76902	-1.41729	-3.77047	0.0002	0.0215787
LOC559490	NC_007116.6:36456663-36465991	control	15	OK	9.96391	4.81948	-1.04783	-2.80028	0.0062	0.244312
LOC559976	NC_007112.6:44681050-44864736	control	15	OK	2.59122	1.56594	-0.726609	-2.18083	0.02765	0.563321
LOC560010	NC_007118.6:39139150-39170099	control	15	OK	2.60132	0.454927	-2.51553	-2.78971	0.02005	0.482793
LOC560440	NC_007118.6:49423134-49441112	control	15	OK	0.358501	1.79767	2.32608	4.47342	0.00105	0.0749482
LOC560773	NC_007125.6:33727753-33752431	control	15	OK	5.26008	15.0525	1.51684	4.91579	5e-05	0.00654421
LOC560805	NC_007119.6:41525572-41606833	control	15	OK	6.81245	4.20165	-0.697217	-2.23524	0.02335	0.517908
LOC560919	NC_007122.6:25512535-25539735	control	15	OK	1.05938	0.34171	-1.63238	-3.48009	0.00165	0.102065
LOC561083	NC_007135.6:25113231-25139689	control	15	OK	0.818251	0.222169	-1.88089	-2.50578	0.01705	0.442019
LOC561540	NC_007126.6:42642575-42724748	control	15	OK	2.09577	0.970738	-1.11033	-2.61415	0.0092	0.312118
LOC561541	NC_007127.6:7393612-7445454	control	15	OK	1.41571	0.830893	-0.768793	-1.96825	0.04355	0.699427
LOC562466	NC_007135.6:31491693-31520632	control	15	OK	1.49912	0.26131	-2.52028	-2.537	0.00205	0.117277
LOC562630	NC_007136.6:34650688-34677378	control	15	OK	2.3508	4.063	0.789393	2.10177	0.0345	0.627805
LOC562793	NC_007127.6:3090061-3134708	control	15	OK	7.81807	3.74648	-1.06127	-2.86461	0.0032	0.158021
LOC562831	NC_007124.6:50833544-50940584	control	15	OK	2.13828	0.839425	-1.34898	-2.55131	0.01605	0.427489
LOC563265	NC_007125.6:29428990-29433797	control	15	OK	24.0239	94.2722	1.97236	6.24934	5e-05	0.00654421
LOC563874	NC_007126.6:19862209-19869659	control	15	OK	12.1394	3.72581	-1.70407	-4.57455	5e-05	0.00654421
LOC563949	NC_007131.6:36477690-36482560	control	15	OK	2.11084	0.768625	-1.45746	-2.64377	0.01455	0.40672
LOC564033	NC_007116.6:38143195-38150454	control	15	OK	0.274123	0.749396	1.45091	1.85193	0.0493	0.728363
LOC564158	NC_007122.6:25039123-25054338	control	15	OK	3.87497	0.865305	-2.1629	-4.95185	5e-05	0.00654421
LOC564307	NC_007114.6:16147384-16218527	control	15	OK	1.67252	0.919863	-0.862536	-2.10231	0.0308	0.593481
LOC564739	NC_007122.6:2421913-2437468	control	15	OK	1.05525	0.260582	-2.01778	-2.54749	0.0162	0.429849
LOC564761	NC_007122.6:3611242-3627398	control	15	OK	0.7564	0.0552743	-3.77447	-3.66579	0.04435	0.701336
LOC565078	NC_007122.6:3556480-3565316	control	15	OK	3.80663	1.52415	-1.32051	-2.60404	0.0117	0.355431
LOC565454	NC_007125.6:11124606-11132045	control	15	OK	0.884999	4.6749	2.40119	5.75628	5e-05	0.00654421
LOC565641	NC_007121.6:20491254-20497272	control	15	OK	3.40731	1.68193	-1.01852	-2.05941	0.0398	0.671222
LOC565781	NC_007126.6:36258375-36262300	control	15	OK	11.3016	28.3178	1.32518	3.38393	0.00125	0.085062
LOC566281	NC_007114.6:52351910-52365427	control	15	OK	2.16649	0.655088	-1.7256	-3.28088	0.0032	0.158021
LOC566907	NC_007132.6:22598799-22601368	control	15	OK	0.466127	1.31014	1.49093	2.22764	0.02795	0.566631
LOC566993	NC_007116.6:37460188-37464067	control	15	OK	0.338253	1.68826	2.31936	2.5456	0.00705	0.266269
LOC566996	NC_007118.6:24095707-24103892	control	15	OK	0.101421	4.93925	5.60586	7.06986	0.00265	0.13973
LOC567192	NC_007118.6:38424465-38427390	control	15	OK	3.35865	1.1638	-1.52904	-2.78152	0.0109	0.339223
LOC567375	NC_007122.6:1383060-1385717	control	15	OK	2.17761	0.917342	-1.24721	-2.17642	0.02975	0.583688
LOC567640	NC_007113.6:1073932-1115056	control	15	OK	2.37136	6.94021	1.54926	4.66125	5e-05	0.00654421
LOC567649	NC_007134.6:21610751-21708283	control	15	OK	7.27106	4.67122	-0.638367	-1.93382	0.044	0.701336
LOC567665	NC_007119.6:20950287-21012986	control	15	OK	0.551569	1.45936	1.40372	2.72392	0.00835	0.296197
LOC567816	NC_007126.6:21925100-21942266	control	15	OK	8.34629	3.44796	-1.27539	-2.5789	0.0134	0.387571
LOC567822	NC_007113.6:38249339-38288904	control	15	OK	0.0751983	1.42607	4.2452	2.53766	0.01395	0.397082
LOC568198	NC_007112.6:14451387-14516705	control	15	OK	5.06253	3.26719	-0.63181	-2.00603	0.0384	0.659202
LOC568460	NC_007124.6:9709399-9737698	control	15	OK	85.4302	15.4973	-2.46273	-7.7983	5e-05	0.00654421
LOC568656	NC_007127.6:45937630-45943336	control	15	OK	161.542	251.919	0.641051	2.06974	0.0404	0.676454
LOC568664	NW_008805582.1:8605-72675	control	15	OK	1.08919	2.38164	1.12871	2.84815	0.0034	0.164874
LOC568697	NC_007125.6:20935338-20940802	control	15	OK	2.39818	4.80701	1.0032	2.16339	0.0298	0.583688
LOC569381	NC_007128.6:52495270-52501348	control	15	OK	0.977745	2.84928	1.54307	3.16	0.00505	0.213022
LOC569505	NC_007126.6:41944052-41959321	control	15	OK	1.01087	3.07219	1.60367	4.07007	0.0004	0.0363284
LOC569583	NC_007127.6:45121253-45131284	control	15	OK	18.3573	35.7823	0.962894	2.87738	0.0037	0.172493
LOC569661	NC_007118.6:13549665-13561574	control	15	OK	0.983652	0.182965	-2.42658	-2.69515	0.0346	0.628318
LOC569792	NC_007124.6:28773488-28783987	control	15	OK	10.7323	5.74328	-0.902016	-2.85343	0.0045	0.196082
LOC570404	NC_007127.6:12716747-12726267	control	15	OK	0.133261	0.651374	2.28923	3.36787	0.0099	0.325992
LOC570492	NC_007130.6:44191612-44223747	control	15	OK	13.1354	4.86797	-1.43207	-4.61185	5e-05	0.00654421
LOC570839	NC_007117.6:197545-202224	control	15	OK	2.15938	0.584755	-1.88472	-2.75858	0.0188	0.465006
LOC570903	NC_007129.6:26472056-26694606	control	15	OK	9.10566	5.19724	-0.809018	-2.57645	0.00835	0.296197
LOC571499	NC_007123.6:44368488-44459487	control	15	OK	0.119894	1.25399	3.38669	2.85299	0.00575	0.232467
LOC571722	NC_007135.6:30043507-30085909	control	15	OK	2.35134	1.14678	-1.0359	-2.64718	0.00835	0.296197
LOC571757	NC_007127.6:49173032-49377703	control	15	OK	5.45268	2.62787	-1.05307	-2.94793	0.00295	0.15045
LOC571944	NC_007118.6:73466241-73475849	control	15	OK	3.73083	1.47515	-1.33864	-3.12749	0.00285	0.146955
LOC572412	NC_007135.6:36045833-36127387	control	15	OK	1.80806	1.06366	-0.765407	-2.35582	0.0145	0.406296
LOC573378	NC_007118.6:61506629-61515964	control	15	OK	2.16605	0.805803	-1.42657	-2.69025	0.01365	0.39237
LOC573741	NC_007127.6:13614943-13661186	control	15	OK	5.8002	3.32975	-0.800685	-2.36852	0.01635	0.432029
LOC792371	NC_007115.6:3465509-3728170	control	15	OK	2.81305	1.49569	-0.911328	-2.33255	0.01945	0.474216
LOC792628	NC_007121.6:33617003-33628984	control	15	OK	0.256638	0.892681	1.79841	2.66117	0.0209	0.491266
LOC792676	NC_007120.6:56868166-56872856	control	15	OK	2.49357	4.6237	0.890838	2.05765	0.0422	0.691383
LOC792773	NC_007125.6:17295892-17353260	control	15	OK	1.79506	0.521718	-1.78269	-4.39597	5e-05	0.00654421
LOC792958	NC_007127.6:55351743-55368175	control	15	OK	4.97046	10.1348	1.02787	2.78105	0.0031	0.156504
LOC793188	NC_007130.6:10566859-10577674	control	15	OK	0.22413	0.786153	1.81047	2.4229	0.0373	0.64907
LOC793236	NC_007121.6:22990167-23001193	control	15	OK	1.01649	2.48835	1.29159	2.81608	0.0053	0.218951
LOC793342	NC_007114.6:3700863-3729157	control	15	OK	2.67789	5.17004	0.94908	2.74181	0.0056	0.227849
LOC793599	NC_007125.6:46657740-46687920	control	15	OK	1.09732	0.171248	-2.67982	-3.92227	0.00245	0.132068
LOC793708	NC_007119.6:44809225-44876459	control	15	OK	0.886426	0.154832	-2.5173	-4.83126	0.00025	0.0256683
LOC794425	NC_007126.6:46053860-46070508	control	15	OK	5.40857	10.5534	0.964384	2.15472	0.0381	0.656789
LOC794549	NC_007118.6:73634355-73634977	control	15	OK	0	1.49581	inf	#NAME?	5e-05	0.00654421
LOC794675	NC_007128.6:20596307-20601116	control	15	OK	3.21618	0.68287	-2.23567	-2.64618	0.0123	0.366503
LOC794939	NC_007116.6:65189882-65199015	control	15	OK	1.4902	0.370081	-2.00959	-3.04237	0.0052	0.21648
LOC795531	NW_003334026.1:3193-21049	control	15	OK	8.08882	2.8867	-1.48651	-3.87237	0.0007	0.0554481
LOC796299	NC_007118.6:20179053-20201822	control	15	OK	4.26422	1.64694	-1.37249	-3.82462	0.0002	0.0215787
LOC796453	NC_007114.6:56882507-56890050	control	15	OK	12.7034	25.4832	1.00433	3.16082	0.0019	0.11087
LOC796869	NC_007128.6:39818721-39838710	control	15	OK	0.560308	0.0842007	-2.73432	-1.26427	0.01775	0.450983
LOC797436	NC_007135.6:26807628-26814507	control	15	OK	0.444879	1.23699	1.47536	2.96035	0.00375	0.17436
LOC797571	NC_007136.6:13086974-13105721	control	15	OK	4.44109	10.4317	1.23198	3.24298	0.00135	0.0893488
LOC798483	NC_007114.6:15539245-15557000	control	15	OK	5.29587	3.17739	-0.737026	-2.12509	0.03165	0.603384
LOC798606	NC_007135.6:28567018-28576780	control	15	OK	1.67281	0.433183	-1.94922	-2.46787	0.00745	0.274998
LOC798614	NC_007118.6:20215675-20250805	control	15	OK	2.55683	0.925254	-1.46644	-3.30731	0.0022	0.123537
LOC798783	NC_007122.6:41440791-41453617	control	15	OK	13.5118	26.4547	0.969307	2.43332	0.01365	0.39237
LOC798983	NC_007122.6:10685771-10814182	control	15	OK	9.83377	6.08768	-0.691854	-2.11994	0.0304	0.589831
LOC799067	NC_007128.6:15289422-15295431	control	15	OK	4.3093	0.958317	-2.16888	-2.66532	0.03795	0.655332
LOC799098	NC_007128.6:33549977-33599861	control	15	OK	2.13335	1.13491	-0.910534	-2.00857	0.04615	0.711328
LOC799225	NC_007112.6:11194739-11213625	control	15	OK	1.02908	0.350869	-1.55235	-2.49862	0.0175	0.447717
LOC799479	NC_007118.6:64707604-64729406	control	15	OK	0.143253	0.615528	2.10326	2.52577	0.03905	0.664334
LOC799656	NC_007127.6:55112858-55119030	control	15	OK	1.53902	5.68165	1.8843	3.5709	0.0023	0.127013
LOC799882	NC_007122.6:28199097-28269603	control	15	OK	1.57162	0.681615	-1.20522	-2.43229	0.006	0.239942
lonp1	NC_007133.6:3143890-3165564	control	15	OK	8.36852	15.6032	0.898796	2.89824	0.00435	0.191934
lonrf1l	NC_007119.6:13731808-13750606	control	15	OK	8.60227	34.4955	2.00362	6.45267	5e-05	0.00654421
loxl1	NC_007129.6:50127739-50156127	control	15	OK	6.70399	2.66256	-1.33221	-4.0015	5e-05	0.00654421
loxl2	NC_007124.6:15103406-15273592	control	15	OK	5.37742	3.07513	-0.806267	-2.3358	0.01805	0.454973
loxl4	NC_007124.6:40056606-40112856	control	15	OK	1.8098	0.866737	-1.06217	-2.62946	0.009	0.308019
lppr5b	NC_007135.6:30087383-30194065	control	15	OK	2.10266	0.787409	-1.41703	-2.58346	0.0071	0.267148
lrfn5a	NC_007128.6:13654371-13775051	control	15	OK	2.07331	0.932393	-1.15292	-2.8677	0.00365	0.171648
lrit1b	NC_007123.6:48952070-48955235	control	15	OK	3.10828	0.861232	-1.85164	-4.05767	0.0004	0.0363284
lrp10	NC_007118.6:23881880-23891707	control	15	OK	10.3216	15.7625	0.610826	1.99303	0.0476	0.718804
lrrc1	NC_007124.6:2345673-2365359	control	15	OK	8.28166	15.8843	0.939609	2.1107	0.0377	0.653271
lrrc24	NC_007113.6:51411842-51471372	control	15	OK	3.68725	2.23392	-0.722969	-1.99048	0.03655	0.643212
lrrc58a	NC_007112.6:46794871-46801729	control	15	OK	0.332428	2.72067	3.03285	4.31276	0.0051	0.213715
lrrc8da	NC_007113.6:22839215-22846880	control	15	OK	3.1311	4.97315	0.66749	1.97772	0.0409	0.679948
lrrtm4l2	NC_007119.6:6354096-6427717	control	15	OK	0.929491	0.268709	-1.7904	-3.09795	0.00265	0.13973
lsamp	NW_003337230.1:18564-31658	control	15	OK	18.6671	9.69461	-0.945242	-2.08254	0.0369	0.645546
lsr	NC_007126.6:34081085-34106957	control	15	OK	8.74357	14.8445	0.763639	2.42444	0.0151	0.413349
lye	NC_007130.6:17461611-17463685	control	15	OK	94.1623	190.144	1.01387	3.29316	0.0011	0.0774124
lyve1b	NC_007129.6:16755240-16759610	control	15	OK	4.22566	1.98757	-1.08817	-2.28432	0.0257	0.543519
maf	NC_007129.6:29424465-29427318	control	15	OK	8.53983	4.15384	-1.03976	-3.10706	0.0019	0.11087
mafa	NC_007117.6:32714672-32718627	control	15	OK	10.2594	4.10711	-1.32074	-4.13729	5e-05	0.00654421
maff	NC_007123.6:19198761-19224773	control	15	OK	24.6964	51.8941	1.07127	2.10696	0.02935	0.579086
mafk	NC_007114.6:42251661-42275777	control	15	OK	3.23433	5.44129	0.750484	2.0043	0.02395	0.525886
mag	NC_007126.6:34030795-34075800	control	15	OK	4.23069	0.784631	-2.43081	-5.4271	5e-05	0.00654421
mamdc2a	NC_007116.6:51862094-51922492	control	15	OK	1.52644	0.73253	-1.05921	-1.99849	0.03555	0.634868
man2b1	NC_007122.6:30972938-31013018	control	15	OK	12.5131	19.7572	0.658943	2.00931	0.04	0.67249
map2	NC_007120.6:38975490-39183581	control	15	OK	13.9307	8.73459	-0.673453	-2.08136	0.03215	0.60664
map3k14	NC_007135.6:36478935-36504318	control	15	OK	3.92565	1.86614	-1.07288	-2.73745	0.00655	0.252979
map3k9	NC_007124.6:36030280-36058980	control	15	OK	2.26481	1.36254	-0.733089	-2.09344	0.0305	0.590625
map7d2a	NC_007116.6:23453771-23496416	control	15	OK	7.35674	4.39417	-0.743474	-2.31116	0.0156	0.419976
mapk1	NC_007116.6:12601376-12666914	control	15	OK	1.72285	0.462015	-1.89879	-3.12675	0.0478	0.719652
mapre3a	NC_007128.6:36918550-36949012	control	15	OK	12.0965	6.3054	-0.939936	-2.82235	0.00355	0.169449
marco	NC_007120.6:796044-813950	control	15	OK	1.72285	0.462015	-1.89879	-3.12675	0.0049	0.208073
marveld2a	NC_007121.6:2919874-2944313	control	15	OK	4.65759	7.51002	0.689232	2.01059	0.0402	0.674233
mat1a	NC_007124.6:18497914-18506159	control	15	OK	71.0259	122.967	0.791851	2.42261	0.01715	0.443298
mat2ab	NC_007116.6:68424615-68439815	control	15	OK	5.61719	14.0719	1.3249	4.15966	5e-05	0.00654421
matn1	NC_007130.6:43719072-43742685	control	15	OK	5.72929	11.4778	1.00242	2.94868	5e-05	0.00654421
matn4	NC_007117.6:52759111-52847817	control	15	OK	131.096	65.3486	-1.00439	-2.86944	0.00405	0.183318
mb	NC_007112.6:54460252-54467434	control	15	OK	75.8144	35.0867	-1.11155	-3.57739	0.0003	0.0297548
mboat1	NC_007127.6:6454524-6484157	control	15	OK	5.72929	11.4778	1.00242	2.94868	0.0024	0.130884
mbpa	NC_007130.6:22229723-22248302	control	15	OK	3.94497	1.08736	-1.85918	-3.90391	0.0001	0.0119493
mchr1b	NC_007114.6:25370832-25379590	control	15	OK	0.735625	0.250861	-1.55208	-2.2996	0.042	0.689882
mcoln1a	NC_007112.6:44979891-45008840	control	15	OK	6.22165	9.72539	0.64446	2.01255	0.03345	0.618013
mdh1b	NC_007128.6:24312606-24425944	control	15	OK	52.6672	23.3019	-1.17646	-3.68813	0.0001	0.0119493
mdm2	NC_007115.6:23404712-23415152	control	15	OK	17.0731	35.7783	1.06736	3.36045	0.001	0.0721887
mef2ca	NC_007121.6:43716441-43827016	control	15	OK	14.3826	7.98383	-0.849171	-2.5769	0.00935	0.315373
mef2cb	NC_007116.6:47529492-47656277	control	15	OK	12.8545	6.95906	-0.885312	-2.4607	0.0119	0.359015
megf11	NC_007129.6:19152661-19416515	control	15	OK	1.87775	1.11434	-0.752809	-1.93883	0.04835	0.724505
meox1	NC_007123.6:27370856-27377378	control	15	OK	7.25101	3.39475	-1.09488	-3.04017	0.0029	0.148441
meox2	NC_007126.6:34566965-34610479	control	15	OK	1.12779	0.315451	-1.83801	-3.74368	0.0008	0.0609558
mettl11b	NC_007131.6:34552686-34565517	control	15	OK	8.19911	2.77974	-1.56052	-3.42201	0.0007	0.0554481
mfsd6b	NC_007120.6:41681043-41705922	control	15	OK	3.18823	5.6069	0.814448	2.34649	0.01735	0.445671
MGC174152	NC_007123.6:16752756-16755251	control	15	OK	1.5667	20.0348	3.6767	8.25391	5e-05	0.00654421
MGC174857	NC_007123.6:16797536-16801288	control	15	OK	0.456685	9.2506	4.34028	7.08908	0.00025	0.0256683
mgea5	NC_007124.6:11856257-11873578	control	15	OK	25.9016	57.7092	1.15576	3.51156	0.00025	0.0256683
mgst1.2	NC_007115.6:12720115-12726664	control	15	OK	8.08544	36.0471	2.15648	6.79695	5e-05	0.00654421
mgst2	NC_007125.6:47229512-47232788	control	15	OK	24.318	41.6315	0.775655	2.44698	0.0148	0.40833
mhc1zba	NC_007112.6:46461957-46470764	control	15	OK	9.97397	21.4524	1.1049	3.49062	0.00045	0.0399878
mia2	NC_007128.6:13065094-13070542	control	15	OK	1.31185	3.03163	1.20849	2.00388	0.0362	0.640433
mibp	NC_007133.6:4733937-4738182	control	15	OK	23.6094	48.5027	1.0387	3.12832	0.0318	0.604105
micall2a	NC_007114.6:42395994-42429478	control	15	OK	1.51319	2.60297	0.782559	1.95008	0.0407	0.678879
minpp1a	NC_007128.6:23690357-23707943	control	15	OK	9.36705	14.9695	0.676358	2.13479	0.03165	0.603384
mipa	NC_007134.6:27141683-27146233	control	15	OK	12.5085	4.20694	-1.57207	-4.7604	5e-05	0.00654421
mipb	NC_007134.6:6703638-6727412	control	15	OK	19.089	5.80807	-1.71661	-5.19383	5e-05	0.00654421
mir133a-2	NC_007134.6:7237284-7238231	control	15	OK	3.96008	1.42541	-1.47415	-1.69011	0.03305	0.613537
mir21-1	NC_007121.6:28311626-28312801	control	15	OK	1.67597	3.94867	1.23637	2.06918	0.0215	0.497849
mknk1	NC_007122.6:13118896-13132092	control	15	OK	7.99694	16.8278	1.07333	3.38739	0.0006	0.0496031
mknk2b	NC_007119.6:20406765-20420076	control	15	OK	23.6094	48.5027	1.0387	3.12832	0.00115	0.0798874
mkxa	NC_007123.6:22840674-22888093	control	15	OK	5.63579	3.14666	-0.840797	-2.40641	0.01725	0.44408
mkxb	NC_007113.6:4144744-4168137	control	15	OK	1.30769	0.346838	-1.91469	-2.52661	0.0289	0.577036
mlip	NC_007124.6:2019271-2083922	control	15	OK	4.60822	2.40841	-0.93613	-2.13588	0.02905	0.578053
mmp11b	NC_007132.6:15538486-15578975	control	15	OK	9.37	5.67184	-0.724233	-2.22384	0.02285	0.513487
mmp13a	NC_007121.6:38649899-38676124	control	15	OK	1.32563	0.614123	-1.11008	-2.03641	5e-05	0.00654421
mmp17b	NC_007125.6:49824784-49855454	control	15	OK	1.32563	0.614123	-1.11008	-2.03641	0.04845	0.725538
mmp9	NC_007119.6:24260285-24274708	control	15	OK	3.67544	17.1923	2.22577	6.65098	5e-05	0.00654421
mnx2a	NC_007120.6:7745590-7751291	control	15	OK	3.60403	1.32763	-1.44076	-2.89238	0.0039	0.178373
morn4	NC_007124.6:40620388-40628595	control	15	OK	7.25407	4.19195	-0.791169	-2.15245	0.02785	0.56575
mpeg1.1	NC_007119.6:29700888-29704389	control	15	OK	3.12706	1.55692	-1.00611	-2.43073	0.0184	0.460645
mpeg1.2	NC_007119.6:19325654-19329417	control	15	OK	1.09819	2.54379	1.21185	2.74135	0.00905	0.308524
mpp1	NC_007132.6:36278311-36338832	control	15	OK	14.4987	24.5502	0.759805	2.38038	0.01665	0.43617
mpp4	NC_007117.6:9631790-9651328	control	15	OK	1.86399	0.46023	-2.01797	-3.49888	0.0011	0.0774124
mpp6b	NC_007130.6:20475911-20522163	control	15	OK	23.2834	15.025	-0.631937	-2.05534	0.03435	0.625889
mpped1	NC_007115.6:8850090-8902284	control	15	OK	3.95082	2.02095	-0.96712	-2.42896	0.01515	0.413909
mpz	NC_007113.6:44406501-44429948	control	15	OK	1.8208	0.584387	-1.63958	-3.30558	0.00155	0.097868
mrc1a	NC_007118.6:58589405-58649989	control	15	OK	4.5497	2.02147	-1.17037	-3.47998	0.0004	0.0363284
msmo1	NC_007112.6:20223613-20235800	control	15	OK	5.13433	12.081	1.23449	3.46166	0.0007	0.0554481
mst1ra	NC_007117.6:42478221-42508561	control	15	OK	1.91992	4.13507	1.10687	3.13345	0.0016	0.0998545
mtbp	NC_007127.6:15207610-15257112	control	15	OK	1.50536	2.69511	0.840241	2.05059	0.04535	0.707555
mthfd1a	NC_007131.6:27747724-27783742	control	15	OK	16.0615	8.62468	-0.89706	-2.89601	0.00355	0.169449
mthfd2	NC_007116.6:68943955-68960194	control	15	OK	19.5938	32.0679	0.710733	2.33187	0.02005	0.482793
mtnr1aa	NC_007112.6:17558400-17643941	control	15	OK	1.00143	0.320157	-1.6452	-2.44505	0.0299	0.584502
muc13b	NC_007123.6:16057653-16073704	control	15	OK	0.88622	0.207218	-2.09652	-2.50647	0.00715	0.268165
murca	NC_007113.6:42342173-42349182	control	15	OK	78.4284	36.2335	-1.11405	-3.63558	0.0002	0.0215787
murcb	NC_007135.6:33811655-33817205	control	15	OK	53.1666	19.9676	-1.41286	-4.55515	5e-05	0.00654421
mutyh	NC_007119.6:18168404-18176295	control	15	OK	2.35885	4.47081	0.922453	2.34967	0.0241	0.526867
mvp	NC_007114.6:15558569-15597195	control	15	OK	29.3194	62.5026	1.09206	2.1945	0.02925	0.578416
mxd1	NC_007116.6:13199243-13267095	control	15	OK	7.32791	4.8543	-0.594137	-1.91925	0.0477	0.719383
myadml2	NC_007114.6:57919768-57921711	control	15	OK	2.07561	0.88477	-1.23016	-2.43399	0.02065	0.48834
mybpc1	NC_007115.6:17737774-17834421	control	15	OK	2.54508	0.851224	-1.5801	-3.10706	0.0008	0.0609558
mybpc2b	NC_007135.6:38414423-38460934	control	15	OK	33.9529	10.8773	-1.64221	-5.30593	5e-05	0.00654421
mybpha	NC_007134.6:6143535-6192041	control	15	OK	7.47043	2.13244	-1.80869	-4.66265	0.0001	0.0119493
mybphb	NC_007117.6:55022673-55190198	control	15	OK	555.91	142.038	-1.96858	-5.26557	5e-05	0.00654421
myef2	NC_007129.6:5552069-5567119	control	15	OK	68.5397	44.6773	-0.617395	-1.98886	0.04285	0.694235
myh11a	NC_007117.6:8264315-8345334	control	15	OK	1.27046	0.213819	-2.57088	-5.22807	5e-05	0.00654421
myh6	NC_007131.6:53772080-53778701	control	15	OK	1.34021	0.526558	-1.34779	-3.1833	0.0028	0.145341
myh9a	NC_007117.6:7578636-7619460	control	15	OK	37.6133	76.0734	1.01615	2.87911	0.0042	0.187442
myha	NC_007116.6:31646562-31657200	control	15	OK	2.5918	0.701095	-1.88627	-4.86036	5e-05	0.00654421
myhb	NC_007117.6:40748130-40758624	control	15	OK	8.30206	2.4702	-1.74884	-5.43766	5e-05	0.00654421
myhc4,myhz2	NC_007116.6:31606135-31633711	control	15	OK	404.092	96.6054	-2.06451	-4.60454	5e-05	0.00654421
myhz1.1,myhz1.2,ns:zf-e68	NC_007116.6:31662343-31708978	control	15	OK	1346.6	186.042	-2.85563	-4.46008	0.00035	0.0331638
myl1	NC_007120.6:39184436-39195505	control	15	OK	1733.31	637.192	-1.44373	-3.42121	0.00145	0.0933211
myl2b	NC_007119.6:4277224-4302769	control	15	OK	1.33749	0.286391	-2.22347	-3.31556	0.00865	0.302245
myl4	NC_007114.6:22092122-22111894	control	15	OK	41.0258	18.1948	-1.173	-3.64921	0.0003	0.0297548
myl9a	NC_007134.6:42920813-42930752	control	15	OK	18.9306	10.4725	-0.854108	-2.31603	0.02375	0.522806
mylipb	NC_007127.6:25621086-25633706	control	15	OK	4.00631	7.47399	0.899604	2.4641	0.0164	0.432371
mylk4b	NC_007131.6:26924672-26981672	control	15	OK	3.01716	1.61626	-0.900531	-2.20757	0.0202	0.484572
mylka	NC_007120.6:4055592-4177096	control	15	OK	2.07811	0.694028	-1.58221	-3.96858	0.0002	0.0215787
mylkb	NC_007117.6:13224234-13265148	control	15	OK	1.20476	0.210092	-2.51965	-4.37126	0.00095	0.0695108
mylz3	NC_007112.6:6862280-6870925	control	15	OK	5232.61	2416.32	-1.11472	-2.00574	0.04425	0.701336
myo10l1	NC_007117.6:10865471-10991761	control	15	OK	1.89381	1.0014	-0.919269	-2.54575	0.0104	0.32848
myo7ab	NC_007132.6:22188875-22273700	control	15	OK	1.07301	0.479817	-1.16111	-2.78475	0.0054	0.221774
myo9b	NC_007113.6:37702424-37762576	control	15	OK	4.25545	6.8906	0.69532	2.25547	0.02295	0.514414
myoc	NC_007131.6:15119576-15125748	control	15	OK	20.4141	12.297	-0.731257	-2.36958	0.0202	0.484572
myom1a	NC_007113.6:30932628-30976510	control	15	OK	53.0285	15.1289	-1.80946	-5.48338	5e-05	0.00654421
myom1b	NC_007118.6:71497642-71566515	control	15	OK	29.9655	11.0708	-1.43654	-4.43813	5e-05	0.00654421
myom2	NC_007124.6:6832371-6859680	control	15	OK	81.6767	15.748	-2.37475	-7.57862	5e-05	0.00654421
myoz1a	NC_007124.6:22134619-22147965	control	15	OK	36.7943	12.799	-1.52345	-4.88967	5e-05	0.00654421
myoz1b	NC_007123.6:26293885-26317801	control	15	OK	182.282	76.4418	-1.25374	-3.95325	0.00025	0.0256683
myoz2a	NC_007118.6:69588476-69616463	control	15	OK	18.9498	7.6646	-1.3059	-3.83798	5e-05	0.00654421
mypn	NC_007124.6:49941335-50008659	control	15	OK	1.48413	0.656802	-1.17609	-3.04321	0.00325	0.159702
myrfl	NC_007115.6:71140270-71193475	control	15	OK	0.762071	0.227502	-1.74405	-2.88353	0.01015	0.326244
myrip	NC_007135.6:10973772-11185806	control	15	OK	4.19142	2.27003	-0.884725	-2.52393	0.0094	0.316602
myt1la	NC_007131.6:30527811-30673680	control	15	OK	10.4056	6.42498	-0.695597	-2.20565	0.0261	0.547514
nabp1a	NC_007120.6:24403892-24407878	control	15	OK	12.7926	7.60806	-0.749709	-2.26723	0.0197	0.477485
nadkb	NC_007113.6:37284783-37312560	control	15	OK	9.52025	14.7688	0.633479	2.01158	0.03955	0.668455
nadl1.2	NC_007134.6:28656230-28766040	control	15	OK	9.20739	5.57017	-0.725069	-2.00353	0.0412	0.682364
naga	NC_007115.6:972511-978700	control	15	OK	15.869	34.962	1.13957	3.68435	0.00015	0.0170511
napepld	NC_007115.6:20759418-20765010	control	15	OK	3.84242	7.19986	0.905953	2.30113	0.0197	0.477485
naprt	NC_007131.6:52461539-52502443	control	15	OK	17.5995	26.7305	0.60295	1.96027	0.0424	0.692392
nbeal2	NC_007127.6:16449095-16614455	control	15	OK	0.61409	1.27059	1.04898	2.81704	0.00395	0.179955
ncaldb	NC_007130.6:12375954-12405074	control	15	OK	4.00352	2.03271	-0.977864	-2.48914	0.01035	0.327343
ndnf	NC_007134.6:2042645-2084638	control	15	OK	20.3978	12.2517	-0.73543	-2.39378	0.01725	0.44408
ndrg1a	NC_007130.6:35372846-35392717	control	15	OK	39.5963	25.171	-0.653602	-2.11799	0.0289	0.577036
ndufa4	NC_007123.6:9842970-9846483	control	15	OK	117.825	74.9782	-0.652105	-2.13028	0.03425	0.625205
neb	NC_007120.6:22994265-23082353	control	15	OK	13.6513	4.60311	-1.56835	-4.78008	5e-05	0.00654421
neflb	NC_007119.6:6831203-6833833	control	15	OK	10.8658	5.14831	-1.07762	-3.20246	0.00185	0.109875
nek6	NC_007132.6:8263318-8304816	control	15	OK	5.2521	8.51373	0.696897	2.08159	0.0354	0.633806
nenf	NC_007128.6:45412553-45419711	control	15	OK	11.2168	22.025	0.973482	2.9716	0.00285	0.146955
nexn	NC_007119.6:18481860-18502206	control	15	OK	22.4883	9.52342	-1.23962	-4.00805	5e-05	0.00654421
nfatc1	NC_007130.6:22632426-22720142	control	15	OK	3.10841	1.30368	-1.25359	-3.1639	0.00115	0.0798874
nfe2l2b	NC_007117.6:10649327-10667495	control	15	OK	2.08006	5.38086	1.37121	3.31154	0.0011	0.0774124
nfil3-3	NC_007117.6:7916309-7920049	control	15	OK	0.139811	0.700054	2.32399	2.27694	0.0281	0.568191
nfil3-6	NC_007114.6:13947693-13953685	control	15	OK	1.75131	3.12368	0.834817	2.32553	0.0221	0.504567
nfybb	NC_007136.6:28380757-28403421	control	15	OK	16.5599	29.4305	0.829613	2.54513	0.011	0.341273
ngfr	NC_007114.6:19980533-20251880	control	15	OK	4.59816	2.7897	-0.720945	-2.04738	0.03735	0.649779
nhsl1a	NC_007128.6:30506525-30574050	control	15	OK	4.62288	2.62395	-0.817053	-2.50535	0.00825	0.294589
nipal3	NC_007128.6:26909944-26916939	control	15	OK	9.93564	16.3127	0.715312	2.3081	0.0223	0.507479
nkx2.4b	NC_007131.6:48971817-48977831	control	15	OK	2.67169	5.112	0.936134	2.1964	0.0244	0.530444
nkx3.2	NC_007125.6:6195-8737	control	15	OK	10.4587	5.93427	-0.817561	-2.19164	0.0266	0.553361
nlgn2a	NC_007121.6:22357222-22510374	control	15	OK	4.26041	2.36238	-0.850754	-2.50996	0.01105	0.341764
nlgn3b	NC_007116.6:22779834-22847475	control	15	OK	8.71027	5.62382	-0.631166	-1.98189	0.04735	0.717194
nlgn4a	NC_007112.6:31788975-31960257	control	15	OK	3.99083	2.4594	-0.698382	-1.94964	0.0454	0.707555
nmba	NC_007129.6:26802586-26803617	control	15	OK	0.694148	2.79212	2.00804	2.92578	0.0165	0.433538
nmrk2	NC_007113.6:55859082-55866489	control	15	OK	32.4235	14.227	-1.18841	-3.52287	0.00055	0.0465129
nmt1b	NC_007123.6:15624641-15633989	control	15	OK	6.19187	13.7317	1.14906	3.2003	0.0016	0.0998545
nog3	NC_007123.6:32273983-32275586	control	15	OK	10.7507	5.64916	-0.928329	-2.2422	0.021	0.492459
nol4lb	NC_007134.6:17219803-17425470	control	15	OK	7.45842	4.41688	-0.755844	-2.03636	0.03545	0.634214
nos2b	NC_007126.6:30442749-30468499	control	15	OK	0.871284	1.69519	0.960237	2.04043	0.03845	0.659786
notum2	NC_007117.6:10707833-10728616	control	15	OK	6.30311	3.50253	-0.847666	-2.37068	0.0153	0.415575
noxo1a	NC_007114.6:61921203-61932275	control	15	OK	1.93649	3.60834	0.897893	2.21636	0.0244	0.530444
npc1	NC_007113.6:3992873-4036082	control	15	OK	19.7294	33.2063	0.751115	2.39523	0.0159	0.425436
npy8br	NC_007119.6:51646883-51675414	control	15	OK	1.62701	0.513334	-1.66425	-2.66041	0.00995	0.325992
nqo1	NC_007118.6:56401842-56420909	control	15	OK	58.3836	103.299	0.823186	2.643	0.0077	0.281261
nr0b2a	NC_007127.6:55167506-55172525	control	15	OK	4.40535	8.47086	0.94325	2.86518	0.00525	0.217527
nr1d2a	NC_007127.6:49879774-49906712	control	15	OK	13.0454	7.01893	-0.894216	-2.83675	0.0049	0.208073
nrap	NC_007123.6:30471650-30503790	control	15	OK	6.20764	2.22472	-1.48042	-4.59503	5e-05	0.00654421
nrgna	NC_007116.6:57702147-57712653	control	15	OK	8.87645	4.46464	-0.991439	-2.27429	0.0276	0.56263
nrip2	NC_007115.6:17582784-17640547	control	15	OK	4.15954	1.23613	-1.7506	-3.68574	0.0003	0.0297548
nrn1lb	NC_007118.6:28746347-28750774	control	15	OK	3.40409	0.592821	-2.5216	-3.19066	0.01595	0.426285
nrxn1b	NC_007124.6:598968-681239	control	15	OK	0.952342	0.44663	-1.0924	-2.49165	0.01015	0.326244
nrxn3a	NC_007128.6:16897628-16957883	control	15	OK	6.25677	3.41258	-0.874557	-2.53686	0.0099	0.325992
nt5c3a	NC_007127.6:7299458-7321956	control	15	OK	60.1001	102.131	0.764987	2.42302	0.01355	0.390618
ntf7	NC_007134.6:4993704-5039938	control	15	OK	1.06368	2.38989	1.16788	2.05061	0.029	0.577879
ntn2	NC_007135.6:38837188-38899803	control	15	OK	2.64877	1.45886	-0.86048	-2.21025	0.02545	0.541503
ntng2a	NC_007119.6:11953358-12074951	control	15	OK	3.03395	1.7299	-0.810507	-2.1105	0.0338	0.621365
nub1	NC_007135.6:41409638-41440084	control	15	OK	0.346533	0.930619	1.4252	2.35411	0.0256	0.542715
nubp1	NC_007114.6:26800838-26847981	control	15	OK	7.1704	12.355	0.784972	2.25011	0.0221	0.504567
nucb1	NC_007114.6:30009748-30022416	control	15	OK	31.1076	48.4921	0.640484	2.0648	0.0377	0.653271
nupr1	NC_007114.6:15355472-15356358	control	15	OK	46.1484	86.3115	0.90327	2.9075	0.0042	0.187442
obsl1b	NC_007120.6:41943077-42000121	control	15	OK	3.42962	1.46655	-1.22562	-3.68938	5e-05	0.00654421
oclna	NC_007121.6:2897603-2915755	control	15	OK	22.9367	35.4166	0.626766	2.05016	0.04125	0.682364
oclnb	NC_007116.6:25612424-25620718	control	15	OK	11.7148	20.3701	0.798123	2.56298	0.0084	0.297669
odc1	NC_007128.6:51654885-51668513	control	15	OK	43.0366	66.8859	0.636139	2.05122	0.0391	0.6647
ogt.1,ogt.2	NC_007125.6:14382157-14440512	control	15	OK	84.7617	50.6536	-0.742749	-2.01468	0.036	0.638831
olfm3a	NC_007135.6:28607145-28632017	control	15	OK	2.83719	1.59547	-0.83048	-2.03716	0.04515	0.706805
onecut3a	NC_007133.6:20436333-20454051	control	15	OK	4.0978	6.7231	0.714279	2.31895	0.02065	0.48834
onecutl	NC_007127.6:29585413-29593657	control	15	OK	10.8203	7.02532	-0.623108	-1.93478	0.04275	0.694068
opn1lw2	NC_007122.6:25243484-25245575	control	15	OK	46.5324	2.53493	-4.19822	-10.8508	5e-05	0.00654421
opn1mw2	NC_007117.6:41188801-41191928	control	15	OK	1.72963	0.0707793	-4.61099	-3.63252	0.04435	0.701336
opn1sw1	NC_007115.6:13578815-13581469	control	15	OK	27.6402	1.49176	-4.21168	-10.1436	5e-05	0.00654421
opn1sw2	NC_007122.6:25232154-25242421	control	15	OK	15.2293	0.939071	-4.01947	-8.14953	5e-05	0.00654421
opn4.1,pxdc1a	NC_007113.6:32851991-32863106	control	15	OK	2.08534	1.01329	-1.04124	-1.96296	0.03715	0.647909
optn	NC_007115.6:8007821-8018689	control	15	OK	10.3597	20.3728	0.975655	3.11356	0.00155	0.097868
osbpl7	NC_007123.6:28658665-28680173	control	15	OK	7.56417	14.2185	0.910518	2.93968	0.0029	0.148441
oser1	NC_007117.6:52717378-52725483	control	15	OK	14.3903	22.6434	0.653996	2.08606	0.03765	0.652889
osgn1	NC_007117.6:50695104-50705470	control	15	OK	15.5194	35.4562	1.19196	3.77907	0.0002	0.0215787
ostm1	NC_007131.6:32575235-32588256	control	15	OK	6.61011	12.2021	0.884381	2.27516	0.0191	0.469771
ostn	NC_007126.6:36371506-36390345	control	15	OK	0.692979	0	#NAME?	#NAME?	0.0014	0.0910234
otc	NC_007120.6:30457292-30463666	control	15	OK	2.67181	0.780954	-1.77451	-3.04884	0.00775	0.282498
otop1	NC_007125.6:195916-205477	control	15	OK	4.98792	9.1165	0.870041	2.36644	0.01785	0.452211
otos	NC_007135.6:26157736-26159618	control	15	OK	7.18679	2.10924	-1.76863	-3.74827	0.001	0.0721887
p4ha2	NC_007132.6:43102683-43136945	control	15	OK	13.4902	8.3396	-0.693859	-2.12514	0.0275	0.562557
paics	NC_007131.6:25719025-25726972	control	15	OK	236.101	482.78	1.03196	2.83263	0.0046	0.19957
pak6b	NC_007131.6:53715784-53765917	control	15	OK	3.02745	5.6165	0.891568	2.20936	0.02135	0.49651
pak7	NW_003335880.2:21-27826	control	15	OK	6.58201	3.44089	-0.935746	-2.33178	0.02065	0.48834
pald1b	NC_007124.6:30038985-30069218	control	15	OK	2.30344	0.850101	-1.43808	-3.2389	0.00135	0.0893488
panx3	NC_007121.6:31113328-31130248	control	15	OK	1.23769	0.463249	-1.41779	-2.32348	0.02905	0.578053
pappa2	NC_007113.6:35003748-35120583	control	15	OK	0.988834	0.32911	-1.58716	-3.45198	0.00145	0.0933211
papss1	NC_007112.6:49842183-49884149	control	15	OK	12.5751	8.20386	-0.61619	-1.92836	0.04535	0.707555
papss2a	NC_007128.6:23661062-23689239	control	15	OK	5.38954	10.803	1.00319	3.09096	0.00215	0.121411
paqr3a	NC_007116.6:38554466-38570819	control	15	OK	6.26983	9.86238	0.65351	1.98124	0.04955	0.729069
paqr8	NC_007131.6:34862641-34865422	control	15	OK	1.68268	0.728804	-1.20716	-2.13443	0.0339	0.622386
parp4	NC_007120.6:20629161-20690844	control	15	OK	1.69018	2.90841	0.783054	2.43533	0.0162	0.429849
parvb	NC_007136.6:4907286-4937097	control	15	OK	30.7434	18.3021	-0.748269	-2.36128	0.01745	0.447092
pbld1,pbld2	NC_007124.6:22713421-22731823	control	15	OK	29.3625	16.0269	-0.873474	-2.58237	0.00795	0.287246
pbx1a	NC_007113.6:19053577-19181725	control	15	OK	22.8515	12.1034	-0.916878	-2.35561	0.01445	0.405544
pcbd1	NC_007124.6:25511550-25596078	control	15	OK	55.6269	85.532	0.620683	1.97951	0.042	0.689882
pcbp3	NC_007120.6:42194036-42331301	control	15	OK	13.4913	6.79333	-0.989838	-2.74928	0.0014	0.0910234
pcdh10a	NC_007112.6:12076615-12110752	control	15	OK	0.77026	3.69927	2.26382	4.45848	5e-05	0.00654421
pcdh15b	NC_007123.6:6509287-6872271	control	15	OK	11.0646	57.7583	2.38408	7.38684	5e-05	0.00654421
pcdh20	NC_007122.6:42622690-42626858	control	15	OK	5.04831	9.98788	0.984377	2.7665	0.0058	0.234218
pcdh2ab7	NW_008805468.1:13775-16174	control	15	OK	10.7648	26.5391	1.3018	3.89488	0.0001	0.0119493
pcdh9	NC_007117.6:4712794-5241097	control	15	OK	27.5204	49.716	0.853209	2.67829	0.0062	0.244312
pck1	NC_007117.6:60055665-60109705	control	15	OK	7.9908	26.039	1.70426	3.64909	0.0004	0.0363284
pcolceb	NC_007118.6:50574134-50598435	control	15	OK	1.84113	0.0657177	-4.80816	-3.33328	0.0307	0.592695
pcp2	NC_007114.6:53022469-53053381	control	15	OK	1.01722	0.323763	-1.65162	-2.71178	0.01605	0.427489
pcsk5a	NC_007116.6:54642489-54727152	control	15	OK	0.858968	0.452391	-0.925035	-2.06074	0.0386	0.660853
pdca	NC_007113.6:21224891-21234607	control	15	OK	0.602561	0.18679	-1.68969	-2.44836	0.0206	0.488312
pdcb	NC_007131.6:34181451-34187946	control	15	OK	2.22707	0.697473	-1.67494	-3.39531	0.0029	0.148441
pde6c	NC_007123.6:5094287-5119142	control	15	OK	1.28007	0.360437	-1.8284	-3.75852	0.0012	0.0822993
pde6h	NC_007117.6:326189-328150	control	15	OK	3.15475	0.956202	-1.72214	-2.41093	0.03435	0.625889
pdgfrb	NW_003335281.1:51260-117389	control	15	OK	4.52453	2.38194	-0.925633	-2.42561	0.01505	0.412626
pdgfrl	NC_007125.6:30018816-30025905	control	15	OK	25.0453	12.2668	-1.02978	-3.21366	0.00155	0.097868
pdia4	NC_007135.6:17190345-17197039	control	15	OK	43.4566	26.2509	-0.727209	-2.38352	0.01775	0.450983
pdpk1a	NC_007114.6:47331063-47356110	control	15	OK	1.69484	3.31429	0.967547	2.48541	0.0098	0.32461
pdzk1	NC_007120.6:5884091-5914092	control	15	OK	2.59588	0.517168	-2.32752	-4.13918	0.00085	0.0639308
per2	NC_007113.6:48455435-48521207	control	15	OK	3.2772	14.5519	2.15067	6.65833	5e-05	0.00654421
per3	NC_007122.6:39694906-39756931	control	15	OK	6.22417	10.6889	0.780156	1.94939	0.03525	0.633063
pfklb	NC_007122.6:44869647-44895862	control	15	OK	14.2639	6.92569	-1.04234	-3.17918	0.00095	0.0695108
pfkma	NC_007134.6:27627244-27645126	control	15	OK	26.3785	10.6311	-1.31107	-4.25583	5e-05	0.00654421
pfkmb	NC_007117.6:39742176-39774702	control	15	OK	22.971	9.53877	-1.26794	-4.0689	5e-05	0.00654421
pfkpa	NC_007135.6:3503607-3973307	control	15	OK	18.8927	11.2471	-0.748285	-2.16164	0.02545	0.541503
pgam2	NC_007132.6:18965040-18969995	control	15	OK	125.574	57.9625	-1.11535	-3.62636	0.00045	0.0399878
pgr	NC_007129.6:41829600-41849528	control	15	OK	0.218809	0.551027	1.33245	2.08562	0.0456	0.708289
phex	NC_007135.6:25259411-25297391	control	15	OK	12.089	6.76536	-0.837452	-2.63598	0.00605	0.240841
phgdh	NC_007120.6:48489032-48516779	control	15	OK	48.352	110.892	1.19751	3.80665	0.00035	0.0331638
phka1	NC_007118.6:51438442-51474769	control	15	OK	7.58571	4.42393	-0.777956	-2.44789	0.0141	0.399242
phkb	NC_007118.6:41871443-42010682	control	15	OK	16.2383	10.4636	-0.634024	-2.03205	0.03695	0.645546
phkg1b	NC_007132.6:25633339-25649168	control	15	OK	5.97052	3.11848	-0.937012	-2.11049	0.0325	0.608977
phlda1	NC_007115.6:1466005-1467049	control	15	OK	8.98912	4.5383	-0.986029	-2.40443	0.01935	0.473261
phlda2	NC_007136.6:23427248-23428532	control	15	OK	24.6338	45.2767	0.878131	2.78528	0.0044	0.193288
phlda3	NC_007134.6:5822469-5825170	control	15	OK	6.54628	11.1188	0.764259	2.1406	0.03355	0.618229
phyhipla	NC_007128.6:20940847-20959366	control	15	OK	3.66682	1.85497	-0.983133	-2.75918	0.00435	0.191934
pi15a	NC_007135.6:14657406-14667564	control	15	OK	1.81701	0.6256	-1.53825	-2.86885	0.00645	0.250498
pi4k2a	NC_007112.6:54059688-54087652	control	15	OK	7.85852	15.3118	0.96231	2.28664	0.0182	0.456945
piezo1	NC_007118.6:55024309-55214560	control	15	OK	4.00444	6.48564	0.695648	2.26664	0.0205	0.487592
pigt	NC_007134.6:12426923-12479659	control	15	OK	0.637016	1.4866	1.22262	2.37525	0.0142	0.400938
pik3ip1	NC_007116.6:20362771-20375704	control	15	OK	8.47041	13.3423	0.655507	2.03688	0.044	0.701336
pim1	NC_007119.6:8889311-8895484	control	15	OK	8.39931	17.7801	1.08192	3.44504	0.00055	0.0465129
pip4k2ab	NC_007113.6:21431535-21504030	control	15	OK	3.77468	2.23031	-0.759113	-2.23193	0.01895	0.467396
pip5kl1	NC_007116.6:31090925-31112333	control	15	OK	0.77026	3.69927	2.26382	4.45848	5e-05	0.00654421
pir,zgc:113276	NC_007122.6:29670438-29699816	control	15	OK	11.0646	57.7583	2.38408	7.38684	5e-05	0.00654421
pitpnaa	NC_007126.6:28477746-28492135	control	15	OK	24.6784	47.7932	0.953556	3.09628	0.0018	0.108376
pkd2l1	NC_007124.6:25324764-25340933	control	15	OK	1.48101	0.413226	-1.84158	-3.40532	0.00295	0.15045
pkhd1l1	NC_007130.6:23264534-23335441	control	15	OK	0.831242	1.46596	0.818507	2.40442	0.01535	0.416448
pkmb	NC_007136.6:28716978-28752871	control	15	OK	180.97	72.2832	-1.32402	-4.01986	5e-05	0.00654421
pkp3a	NC_007136.6:22053722-22094180	control	15	OK	27.5204	49.716	0.853209	2.67829	0.0062	0.244312
pla2g12b	NC_007124.6:4542974-4555204	control	15	OK	162.44	287.351	0.822907	2.33926	0.0176	0.449291
pla2g7	NC_007131.6:35559397-35578705	control	15	OK	9.31661	15.7108	0.75388	2.32994	0.0187	0.464502
plat	NC_007119.6:2200978-2248055	control	15	OK	2.06138	3.77083	0.871274	2.30065	0.0198	0.478748
plbd1	NC_007114.6:3955276-3983944	control	15	OK	5.04831	9.98788	0.984377	2.7665	0.0058	0.234218
plcd1a	NC_007135.6:20228024-20305541	control	15	OK	10.7648	26.5391	1.3018	3.89488	0.0001	0.0119493
plcxd3	NC_007119.6:31812036-31856061	control	15	OK	5.27448	2.57563	-1.0341	-2.71826	0.0067	0.25693
pld1b	NC_007135.6:26519605-26594106	control	15	OK	2.52597	4.42457	0.808699	2.39825	0.01465	0.407563
plek2	NC_007124.6:32993033-33004161	control	15	OK	0.796622	4.90846	2.6233	6.10103	5e-05	0.00654421
plekhf1	NC_007118.6:45703180-45704590	control	15	OK	2.39359	6.54655	1.45156	3.26873	0.00255	0.136304
plin2	NC_007126.6:17094611-17113982	control	15	OK	1.68562	7.62486	2.17743	5.18715	5e-05	0.00654421
plod2	NC_007135.6:5205894-5283760	control	15	OK	8.71875	5.443	-0.67972	-2.14088	0.0263	0.549733
plp1b	NC_007116.6:22764319-22776374	control	15	OK	1.52384	0.58297	-1.38622	-2.34027	0.0132	0.384006
pls1	NC_007113.6:8262769-8313955	control	15	OK	1.24645	0.371125	-1.74784	-3.13511	0.00305	0.154537
pltp	NC_007117.6:55347327-55383508	control	15	OK	8.01344	4.63358	-0.790296	-2.16964	0.0265	0.552429
plxdc1	NC_007123.6:15321161-15419155	control	15	OK	0.719414	0.245958	-1.54841	-2.06272	0.04445	0.701493
pmepa1	NC_007117.6:60055665-60109705	control	15	OK	5.28671	10.4744	0.986429	1.78805	0.0283	0.569767
pmp22b	NC_007123.6:37100590-37124929	control	15	OK	66.4063	37.4207	-0.827484	-2.61018	0.01035	0.327343
pmt	NC_007125.6:1422192-1432756	control	15	OK	3.56214	8.06921	1.17968	2.84757	0.00715	0.268165
pnp4b	NC_007127.6:36854039-36880633	control	15	OK	2.23003	0.694333	-1.68336	-2.76968	0.01375	0.393951
poc1bl	NC_007130.6:34581900-34634231	control	15	OK	5.77482	9.45409	0.711163	2.18397	0.0246	0.532807
ponzr3	NC_007118.6:22398117-22425830	control	15	OK	57.969	15.1426	-1.93667	-4.66475	5e-05	0.00654421
ponzr4	NC_007118.6:22398117-22425830	control	15	OK	30.8192	3.17403	-3.27944	-5.0968	5e-05	0.00654421
popdc3	NC_007127.6:7736512-7741358	control	15	OK	5.39123	2.44689	-1.13966	-2.11944	0.02115	0.494651
postna	NC_007121.6:25800485-25854951	control	15	OK	10.3796	6.33279	-0.712832	-2.27661	0.0251	0.537321
pou2f1a	NC_007126.6:45544-61490	control	15	OK	9.26181	15.2119	0.715834	1.93433	0.0486	0.726076
ppap2cb	NC_007133.6:21524440-21559692	control	15	OK	5.78972	9.30337	0.684259	1.98476	0.0464	0.711578
ppfia3	NC_007114.6:29891601-29992394	control	15	OK	10.4204	6.30539	-0.724751	-2.08994	0.0321	0.60664
ppfibp2a	NC_007129.6:29166917-29213795	control	15	OK	7.73391	4.12288	-0.907543	-2.69071	0.0044	0.193288
ppl	NC_007114.6:36317930-36340138	control	15	OK	41.0344	78.3665	0.933402	2.71142	0.0074	0.274455
ppm1e	NC_007121.6:32739150-32846817	control	15	OK	4.33946	2.2398	-0.954142	-2.61391	0.0073	0.271753
ppox	NC_007127.6:42337921-42402829	control	15	OK	2.38875	6.28539	1.39575	2.91093	0.00315	0.156879
ppp1r13ba	NC_007128.6:14606202-14683699	control	15	OK	6.48149	4.08137	-0.667271	-2.05099	0.03515	0.632564
ppp1r14c	NC_007134.6:39914944-39956291	control	15	OK	77.1652	47.578	-0.697655	-1.8625	0.04825	0.723936
ppp1r15a	NC_007118.6:71262953-71268297	control	15	OK	22.6441	45.2457	0.998647	3.26467	0.00135	0.0893488
ppp1r3a	NC_007136.6:21689689-21698525	control	15	OK	2.3011	1.42549	-0.690871	-1.92034	0.04915	0.728079
ppp2r2ca	NC_007112.6:13570205-13621133	control	15	OK	10.3063	5.42959	-0.924608	-2.73798	0.0056	0.227849
ppp2r3a	NC_007113.6:25517886-25637405	control	15	OK	12.2347	6.86159	-0.83436	-2.66749	0.00635	0.248406
ppp2r5b	NC_007118.6:24787288-24830472	control	15	OK	7.00541	4.32237	-0.696646	-2.17965	0.02475	0.534238
ppp6r2	NC_007129.6:6852989-6897212	control	15	OK	2.54503	4.21322	0.727244	2.22477	0.0233	0.517619
pqlc2	NC_007119.6:10899822-10915187	control	15	OK	7.82665	13.3627	0.771749	2.32173	0.01945	0.474216
prdm15	NC_007121.6:33325388-33357790	control	15	OK	3.09736	1.74208	-0.830227	-2.19186	0.0279	0.566273
prdm5	NC_007134.6:1916200-2027217	control	15	OK	3.41738	1.9289	-0.825112	-2.08236	0.03345	0.618013
prdx1	NC_007113.6:6194608-6203807	control	15	OK	46.0163	282.802	2.61958	8.09944	5e-05	0.00654421
prdx5	NC_007132.6:26620777-26641199	control	15	OK	124.563	241.681	0.956228	2.13499	0.0329	0.612375
prdx6	NC_007131.6:15264980-15285249	control	15	OK	55.0083	101.101	0.878079	2.86963	0.00505	0.213022
prelp	NC_007122.6:20916066-20925096	control	15	OK	3.20787	0.656359	-2.28906	-4.27513	0.0004	0.0363284
prkar2b	NC_007136.6:3345762-3377711	control	15	OK	10.9075	6.82617	-0.676172	-1.92937	0.04535	0.707555
prkcbp1l	NC_007134.6:9874657-9928661	control	15	OK	22.1883	12.8659	-0.786245	-2.55498	0.00855	0.300701
prkcq	NC_007115.6:25402031-25454177	control	15	OK	1.94976	0.930082	-1.06787	-2.46461	0.01425	0.40154
prob1	NC_007132.6:30047935-30074439	control	15	OK	0.731807	0.343149	-1.09263	-2.07488	0.0368	0.645248
proca	NC_007113.6:5544664-5564096	control	15	OK	10.2698	17.8059	0.793949	2.4537	0.0102	0.326244
prom1b	NC_007112.6:22022185-22066471	control	15	OK	8.3024	3.87716	-1.09853	-3.32411	0.00075	0.0584825
proser2	NC_007115.6:1390563-1400027	control	15	OK	9.13079	15.4919	0.762707	2.44917	0.01355	0.390618
prox1a	NC_007128.6:32866771-32914844	control	15	OK	21.4727	12.1331	-0.823558	-2.44445	0.01015	0.326244
prp	NW_003336732.1:30253-156054	control	15	OK	4.62017	1.84687	-1.32287	-3.94378	5e-05	0.00654421
prph2a	NC_007123.6:34795943-34800811	control	15	OK	1.96575	0.0462315	-5.41006	-4.29844	0.04435	0.701336
prph2b	NC_007124.6:3119599-3125423	control	15	OK	1.83276	0.16827	-3.44517	-4.85601	0.00315	0.156879
prph2l	NC_007131.6:27485047-27492022	control	15	OK	1.83368	0.719268	-1.35014	-2.62833	0.0108	0.337159
prss12	NC_007112.6:19375970-19446354	control	15	OK	2.64437	1.26539	-1.06334	-2.58023	0.0119	0.359015
prss16	NC_007126.6:43406172-43447221	control	15	OK	12.1283	21.209	0.8063	2.55879	0.0117	0.355431
prtga	NC_007129.6:730400-733832	control	15	OK	0	0.627736	inf	#NAME?	0.0218	0.500821
psap	NC_007124.6:4876325-4938259	control	15	OK	166.395	508.305	1.61108	3.99755	0.0001	0.0119493
psat1	NC_007116.6:68713692-68727226	control	15	OK	44.9263	99.5571	1.14796	3.69491	0.00025	0.0256683
psme1	NC_007135.6:12801449-12810063	control	15	OK	2.64979	7.20955	1.44403	3.22041	0.0021	0.119067
ptgdsb,zgc:153154	NC_007135.6:16877093-16884916	control	15	OK	111.739	187.787	0.748971	2.36534	0.01585	0.42426
ptger1b	NC_007114.6:13677866-13688169	control	15	OK	0.900305	0.266911	-1.75405	-2.47781	0.0199	0.480337
ptgir	NC_007126.6:9141264-9209432	control	15	OK	1.14915	0.42921	-1.42082	-2.59153	0.01225	0.365948
ptgs1	NC_007116.6:64226203-64265272	control	15	OK	4.74213	8.60649	0.85989	2.48343	0.0138	0.394899
ptgs2b	NC_007131.6:34218943-34224518	control	15	OK	6.12081	3.80182	-0.687032	-2.19874	0.02005	0.482793
ptplad2	NC_007118.6:18736973-18751240	control	15	OK	3.47232	7.16083	1.04423	2.1338	0.02985	0.583688
ptpn23b	NC_007130.6:19668405-19698317	control	15	OK	2.48408	4.1221	0.730667	2.1075	0.03375	0.620934
ptrfa	NC_007114.6:16826271-16867224	control	15	OK	6.38556	3.0614	-1.06062	-2.53584	0.01015	0.326244
ptrh1	NC_007116.6:64397693-64404659	control	15	OK	3.2275	6.33178	0.972193	2.30705	0.02145	0.49702
pvalb3	NC_007123.6:17583343-17585643	control	15	OK	26.4689	13.9222	-0.926909	-2.56177	0.00975	0.323873
pvalb6	NC_007114.6:24222038-24304359	control	15	OK	15.7735	6.4982	-1.27939	-3.32827	0.0013	0.0873607
pvalb8	NC_007114.6:60921630-60930162	control	15	OK	45.1784	20.5411	-1.13712	-3.51327	0.00015	0.0170511
pvrl1a	NC_007132.6:22542025-22598637	control	15	OK	2.81567	1.07033	-1.39542	-2.9308	0.00345	0.166034
pxmp2	NC_007116.6:19610373-19619288	control	15	OK	2.64908	5.95013	1.16743	2.75697	0.00645	0.250498
pygma	NC_007132.6:28408347-28437454	control	15	OK	29.6978	15.6861	-0.920869	-2.87984	0.00385	0.177361
pygmb	NC_007118.6:22552731-22581017	control	15	OK	17.1246	10.2326	-0.742895	-2.34159	0.0157	0.421696
pyroxd2	NC_007124.6:40158845-40190477	control	15	OK	5.78024	3.34722	-0.788165	-2.38485	0.0147	0.40782
qdpra	NC_007125.6:47886141-47910067	control	15	OK	7.3696	20.0313	1.4426	2.1885	0.02985	0.583688
qdpra	NC_007125.6:47886141-47910067	control	15	OK	24.3395	54.17	1.1542	2.80715	0.00365	0.171648
rab6b	NC_007117.6:27676684-27885945	control	15	OK	8.33831	5.19947	-0.681391	-2.10666	0.0341	0.624421
rabgap1l2	NC_007113.6:36916236-36922939	control	15	OK	11.244	20.2193	0.84658	2.70413	0.0077	0.281261
rad23ab	NC_007133.6:4360760-4375868	control	15	OK	3.64961	6.04904	0.728963	1.99332	0.0376	0.652345
rapsn	NC_007129.6:20504662-20523552	control	15	OK	14.2041	7.14526	-0.991245	-2.63679	0.0064	0.250082
rasd1	NC_007123.6:1370085-1371688	control	15	OK	13.7176	31.3233	1.1912	3.72673	5e-05	0.00654421
rasl12	NC_007118.6:13503471-13529481	control	15	OK	1.12363	0.310216	-1.85682	-1.96435	0.031	0.595532
rassf10b	NC_007118.6:65715128-65717724	control	15	OK	6.67507	3.89797	-0.776058	-2.1037	0.03245	0.608977
rassf5	NC_007122.6:21119421-21203217	control	15	OK	3.88901	2.38688	-0.704274	-2.01859	0.03695	0.645546
rbfox1	NC_007114.6:27853315-28297351	control	15	OK	43.6138	25.9582	-0.748598	-2.06194	0.0321	0.60664
rbfox1l	NC_007127.6:31944342-31964047	control	15	OK	42.7952	22.8673	-0.904166	-2.7534	0.005	0.211678
rbm4.2	NC_007118.6:22524964-22530092	control	15	OK	42.5879	26.6198	-0.677942	-2.20077	0.02435	0.530345
rbp2a	NC_007126.6:5815658-5827065	control	15	OK	109.022	39.9853	-1.44708	-4.5006	5e-05	0.00654421
rbpms2a	NC_007136.6:5963925-6022621	control	15	OK	28.6511	16.879	-0.763365	-2.39971	0.01395	0.397082
rcbtb2	NC_007126.6:3136834-3174093	control	15	OK	3.09859	4.93734	0.67212	2.01666	0.039	0.664129
rce1a	NC_007118.6:17923916-17942648	control	15	OK	2.99214	1.84386	-0.698443	-1.83605	0.04665	0.712759
rcn3	NC_007114.6:32400848-32410049	control	15	OK	54.026	21.9944	-1.29652	-3.37694	0.0009	0.0667592
rcv1	NC_007127.6:14021571-14031295	control	15	OK	30.8739	10.0305	-1.62199	-5.12927	5e-05	0.00654421
rcvrna	NC_007114.6:49405367-49408466	control	15	OK	18.7612	3.95742	-2.24512	-5.47011	5e-05	0.00654421
rdh10b	NC_007113.6:30199135-30202774	control	15	OK	6.15841	10.5511	0.776762	2.20501	0.02925	0.578416
rdh12l	NC_007135.6:32659263-32668193	control	15	OK	3.04291	8.98036	1.56132	3.83368	5e-05	0.00654421
reep3b	NC_007123.6:8784894-8844343	control	15	OK	29.6872	53.8576	0.859309	2.79908	0.00625	0.245729
reep6	NC_007122.6:7252114-7264530	control	15	OK	1.69623	0.612174	-1.47032	-2.14332	0.04225	0.691717
relb	NC_007126.6:17164227-17189208	control	15	OK	3.49981	7.07687	1.01584	3.00751	0.00255	0.136304
renbp	NC_007119.6:36998539-37011466	control	15	OK	5.47066	9.33803	0.771403	2.22977	0.02665	0.553578
rfesd	NC_007132.6:11737207-11741824	control	15	OK	0.342171	1.82023	2.41133	2.94559	0.0257	0.543519
rfwd3	NC_007136.6:36679403-36691735	control	15	OK	4.095	6.7179	0.714148	2.02733	0.0464	0.711578
rgs11	NC_007112.6:9202838-9230524	control	15	OK	1.71825	0.882257	-0.961672	-1.70051	0.04755	0.718804
rgs17	NC_007124.6:23593519-23626281	control	15	OK	10.2647	5.89848	-0.799274	-1.98804	0.03355	0.618229
rgs5a	NC_007117.6:35403978-35417894	control	15	OK	6.44846	3.65137	-0.820518	-2.38305	0.01545	0.418028
rgs8	NC_007117.6:35478315-35504016	control	15	OK	7.14548	4.04203	-0.821949	-2.07587	0.044	0.701336
rgs9a	NC_007114.6:36236947-36260149	control	15	OK	1.1921	0.317594	-1.90825	-2.45648	0.03055	0.590777
rhbdd1	NC_007126.6:36075096-36086933	control	15	OK	2.11874	4.12191	0.960103	2.15645	0.0323	0.608322
rhbdl3	NC_007117.6:22152170-22227150	control	15	OK	7.91567	4.78475	-0.726267	-1.92749	0.04895	0.727116
rhbg	NC_007127.6:29331177-29342563	control	15	OK	43.4467	23.8998	-0.862248	-2.7549	0.0061	0.241459
rho	NC_007119.6:53668766-53670315	control	15	OK	54.6417	20.579	-1.40883	-4.5767	5e-05	0.00654421
rhoua	NC_007124.6:24203479-24248819	control	15	OK	5.02964	8.57434	0.76957	2.36848	0.01435	0.403222
rhpn2	NC_007118.6:38078355-38122159	control	15	OK	7.8942	13.9689	0.823353	2.53672	0.008	0.288606
rimbp2	NC_007119.6:43941174-44210135	control	15	OK	2.33869	1.2637	-0.888054	-2.07068	0.02165	0.499505
riok3	NC_007135.6:36351576-36365138	control	15	OK	26.756	55.6856	1.05744	3.45709	0.00075	0.0584825
rlbp1a	NC_007118.6:13620943-13638474	control	15	OK	19.8523	12.0803	-0.716642	-2.2233	0.02925	0.578416
rnasel3	NC_007125.6:38313954-38316087	control	15	OK	48.7903	20.2797	-1.26656	-3.9483	0.0001	0.0119493
rnaset2	NC_007124.6:9737729-9752594	control	15	OK	14.6074	23.4314	0.681746	2.0464	0.03505	0.631902
rnf114	NC_007134.6:3558674-3568727	control	15	OK	7.31765	13.4526	0.878428	2.67339	0.0057	0.230979
rnf128a	NC_007116.6:23173629-23193074	control	15	OK	17.9428	31.3612	0.805575	2.62388	0.00945	0.31737
rnf151	NC_007123.6:18336791-18344381	control	15	OK	1.19009	0.167349	-2.83014	-3.53465	0.00585	0.235287
rnf183	NC_007126.6:35023249-35035199	control	15	OK	8.52027	17.2188	1.01502	2.93764	0.00405	0.183318
rnf213a	NC_007114.6:56631731-56746415	control	15	OK	1.02346	1.97997	0.952031	2.95556	0.0033	0.161479
rnf31	NC_007113.6:28156564-28199165	control	15	OK	3.34438	5.78042	0.789434	2.32603	0.01715	0.443298
rom1a	NC_007116.6:66448400-66467146	control	15	OK	0.981488	0.315905	-1.63548	-3.24049	0.0035	0.167863
rp1l1	NC_007128.6:5599448-5665025	control	15	OK	0.823561	0.36778	-1.16303	-2.55473	0.0104	0.32848
rpe65a	NC_007113.6:2316198-2330993	control	15	OK	21.3295	13.0858	-0.704849	-2.24602	0.0258	0.544483
rpgrip1	NC_007135.6:7719197-7748123	control	15	OK	2.28144	0.884182	-1.36753	-3.39363	0.00145	0.0933211
rph3a	NC_007121.6:3461469-3511074	control	15	OK	2.46027	0.863614	-1.51036	-3.06541	0.0042	0.187442
rreb1b	NC_007113.6:21342171-21404153	control	15	OK	5.50017	3.60265	-0.61042	-1.97055	0.04345	0.699265
rrh	NC_007124.6:12395642-12408064	control	15	OK	1.87575	0.795663	-1.23724	-2.10026	0.04475	0.703212
rrm2	NC_007131.6:29589589-29596552	control	15	OK	10.2935	15.7723	0.615665	1.93763	0.04375	0.701192
rrm2b	NC_007130.6:33329266-33341352	control	15	OK	26.9536	43.1308	0.678241	2.16035	0.02505	0.537321
rs1a	NC_007122.6:29997217-30004914	control	15	OK	40.1912	11.7746	-1.77121	-5.47846	5e-05	0.00654421
rsl24d1	NC_007136.6:446957-452320	control	15	OK	231.826	380.584	0.715168	2.15162	0.03305	0.613537
rsrp1	NC_007124.6:45331503-45338399	control	15	OK	82.3641	52.2293	-0.657157	-1.94317	0.04615	0.711328
rtn2a	NC_007126.6:9031743-9067087	control	15	OK	34.8607	9.30629	-1.90532	-4.92839	5e-05	0.00654421
rtn2b	NC_007132.6:21337653-21349484	control	15	OK	24.512	11.9377	-1.03796	-3.26097	0.00115	0.0798874
rtn4rl2a	NC_007112.6:43789773-43793478	control	15	OK	1.28448	0.537554	-1.2567	-2.31636	0.02235	0.507957
runx1t1	NC_007130.6:34114401-34199484	control	15	OK	18.642	11.2447	-0.729307	-2.29358	0.0181	0.455905
rwdd3	NC_007113.6:19982813-19991192	control	15	OK	1.61246	3.38169	1.06848	2.23117	0.0306	0.591254
rx1	NC_007133.6:4614880-4634995	control	15	OK	6.43341	4.0503	-0.667557	-1.96185	0.04895	0.727116
rx2	NC_007113.6:55707830-55839424	control	15	OK	5.96041	2.99955	-0.990664	-2.0874	0.0289	0.577036
ryr1b	NC_007129.6:35514638-35757337	control	15	OK	4.73307	2.34201	-1.01503	-3.22382	0.0009	0.0667592
ryr3	NC_007131.6:29328632-29517828	control	15	OK	5.8617	2.60325	-1.17101	-3.27654	0.00055	0.0465129
s100a10a	NC_007130.6:8687957-8689348	control	15	OK	17.9573	7.0385	-1.35123	-3.56688	0.0015	0.095747
s100a10b	NC_007127.6:23482752-23484253	control	15	OK	291.604	451.677	0.631279	1.96762	0.04815	0.7229
s100t	NC_007127.6:22766427-22767996	control	15	OK	79.731	46.6887	-0.772067	-2.49651	0.0124	0.369169
s100v1	NC_007127.6:28819823-28825386	control	15	OK	52.1653	90.4954	0.794753	2.60517	0.01025	0.326244
s100z	NC_007132.6:7258021-7305746	control	15	OK	3.13639	14.3309	2.19195	4.95713	5e-05	0.00654421
s1pr3	NC_007132.6:2973356-2980132	control	15	OK	1.6382	0.787768	-1.05627	-2.11518	0.0374	0.650325
s1pr3a	NC_007133.6:21449377-21453045	control	15	OK	1.70361	0.662226	-1.3632	-2.28096	0.0221	0.504567
safb	NC_007133.6:15669475-15678434	control	15	OK	51.0376	28.6984	-0.830591	-2.64367	0.0066	0.254349
sagb	NC_007126.6:45625522-45647702	control	15	OK	32.25	9.07706	-1.829	-5.19544	5e-05	0.00654421
samd11	NC_007134.6:23093679-23197351	control	15	OK	13.0257	6.61401	-0.977761	-3.07072	0.00145	0.0933211
sar1ab	NC_007124.6:30014480-30020145	control	15	OK	30.7287	19.7432	-0.638232	-2.07408	0.03455	0.628225
sardh	NC_007121.6:10428320-10603584	control	15	OK	29.2383	60.0423	1.03812	3.24977	0.00085	0.0639308
sat1a.2	NC_007116.6:4033410-4041340	control	15	OK	41.006	92.4607	1.173	3.79947	0.0002	0.0215787
satb2	NC_007120.6:32745523-32805206	control	15	OK	3.55032	1.42437	-1.31763	-3.85455	5e-05	0.00654421
sb:cb252	NC_007125.6:11151473-11154986	control	15	OK	65.1682	144.279	1.14662	3.71935	0.0001	0.0119493
sc:d0413	NC_007119.6:8763234-8811446	control	15	OK	3.50981	1.88087	-0.89999	-2.5377	0.0123	0.366503
scamp2	NC_007136.6:2889820-2908806	control	15	OK	16.606	25.389	0.612502	1.97721	0.0465	0.711865
scamp2l	NC_007118.6:56787508-56805311	control	15	OK	3.41331	5.89427	0.788143	2.15116	0.0293	0.579078
scara3	NC_007131.6:39380987-39397856	control	15	OK	2.30159	0.820857	-1.48743	-3.30515	0.00245	0.132068
scara5	NC_007131.6:1334265-1362980	control	15	OK	2.37621	1.05981	-1.16486	-2.40586	0.0165	0.433538
sccpdha	NC_007128.6:12005500-12021706	control	15	OK	2.46204	4.68234	0.927375	2.25448	0.0285	0.572477
scd	NC_007123.6:48407390-48422876	control	15	OK	0.583036	1.26526	1.11778	2.23679	0.0332	0.615342
scel	NC_007120.6:17298420-17327977	control	15	OK	26.5391	45.073	0.764145	2.43924	0.01345	0.388535
scn4ab	NC_007114.6:22111974-22186270	control	15	OK	1.83771	0.734004	-1.32405	-3.48747	0.00075	0.0584825
scn4ba	NC_007126.6:12533437-12569521	control	15	OK	3.46172	1.04943	-1.72188	-4.24732	5e-05	0.00654421
scn4bb	NC_007116.6:37318366-37335479	control	15	OK	1.54815	0.633902	-1.28821	-2.24594	0.028	0.567152
scpp5	NC_007112.6:43208768-43214402	control	15	OK	3.05505	0.555615	-2.45904	-3.58981	0.00895	0.307359
scxb	NC_007127.6:31434394-31449759	control	15	OK	1.41107	0.44418	-1.66758	-2.58536	0.01805	0.454973
sdr16c5a	NC_007113.6:11698743-11720750	control	15	OK	19.2734	29.6375	0.620812	1.97364	0.0428	0.694068
sdsl	NC_007128.6:14597937-14605774	control	15	OK	0.914223	0.288432	-1.66431	-2.16524	0.04295	0.694891
selt2	NC_007125.6:17274917-17282721	control	15	OK	71.2766	116.185	0.704927	2.2416	0.0257	0.543519
sema3fa	NC_007117.6:42821503-42918238	control	15	OK	8.60518	5.56081	-0.62991	-1.93939	0.04925	0.728363
sept5b	NC_007121.6:44089451-44117231	control	15	OK	16.5831	7.43806	-1.15671	-3.26986	0.0016	0.0998545
sept8b	NC_007125.6:50052437-50075406	control	15	OK	9.85733	4.55316	-1.11433	-3.02033	0.00245	0.132068
sepw2b	NC_007114.6:19954004-19956471	control	15	OK	39.6397	128.546	1.69727	5.48099	5e-05	0.00654421
serinc2	NC_007130.6:15504000-15516356	control	15	OK	21.6083	33.2761	0.622901	2.03988	0.04125	0.682364
serpinb1	NC_007131.6:26981785-26987759	control	15	OK	18.1992	29.2089	0.682536	2.1695	0.02995	0.584827
serpinb14	NC_007127.6:51377959-51390717	control	15	OK	27.0922	56.528	1.06109	3.11679	0.0013	0.0873607
serpine1	NC_007118.6:25994394-25998816	control	15	OK	5.3007	18.9637	1.83899	5.40927	5e-05	0.00654421
serpinf1	NC_007132.6:40082912-40096616	control	15	OK	2.58452	4.82152	0.899592	2.12325	0.03925	0.665473
serpinf2a	NC_007132.6:40068743-40081363	control	15	OK	0.966586	0.318987	-1.5994	-2.37314	0.0312	0.597734
serpinh1b	NC_007126.6:29426867-29454581	control	15	OK	149.374	67.086	-1.15485	-3.42747	0.0004	0.0363284
sesn2	NC_007130.6:43745583-43761860	control	15	OK	4.10402	11.2856	1.45937	4.1321	5e-05	0.00654421
sfrp2	NC_007112.6:24798546-24805304	control	15	OK	39.6579	15.2912	-1.37491	-4.45666	5e-05	0.00654421
sgcg	NC_007126.6:9351180-9381866	control	15	OK	14.9355	8.64859	-0.788207	-2.12131	0.0296	0.581887
sgk1	NC_007134.6:31713707-31766795	control	15	OK	16.6204	28.7559	0.790902	2.53435	0.00895	0.307359
sgpp2	NC_007126.6:42279362-42299711	control	15	OK	2.58452	4.82152	0.899592	2.12325	0.03925	0.665473
sh2d3cb	NC_007116.6:64435170-64482709	control	15	OK	1.39289	0.44279	-1.65338	-2.52489	0.01645	0.433037
sh3bgr	NC_007126.6:5935971-5982873	control	15	OK	82.7616	36.4342	-1.18367	-2.94344	0.0032	0.158021
sh3pxd2ab	NC_007128.6:20500621-20538988	control	15	OK	3.65738	1.79563	-1.02632	-2.9284	0.0047	0.202031
sh3yl1	NC_007128.6:30587855-30635756	control	15	OK	3.21413	7.2457	1.1727	3.14554	0.0019	0.11087
shank1	NC_007114.6:30566143-30733921	control	15	OK	4.48953	2.79218	-0.685172	-2.14963	0.0244	0.530444
shank2	NC_007129.6:50974681-51006609	control	15	OK	0.986092	0.294113	-1.74535	-3.27201	0.00185	0.109875
shisa2	NC_007116.6:21563769-21566429	control	15	OK	3.80814	1.28005	-1.57289	-2.96215	0.0074	0.274455
shisa7b	NC_007130.6:10298665-10326135	control	15	OK	8.88267	4.51935	-0.974877	-3.12622	0.0017	0.104146
shisa9a	NC_007123.6:19670431-19743764	control	15	OK	2.17874	1.02351	-1.08997	-2.3157	0.0197	0.477485
si:ch1073-155h21.2	NC_007131.6:117842-124687	control	15	OK	1.96587	0.779113	-1.33526	-2.92062	0.007	0.264666
si:ch1073-174d20.2	NC_007136.6:36571692-36589609	control	15	OK	8.57669	14.5377	0.761305	2.45984	0.01185	0.358278
si:ch1073-184j22.2	NC_007113.6:5485225-5493012	control	15	OK	4.5197	2.2397	-1.01292	-2.58953	0.0117	0.355431
si:ch1073-340i21.3	NC_007126.6:46114786-46121453	control	15	OK	22.4535	38.2296	0.767747	2.48925	0.01475	0.40833
si:ch1073-385f13.3	NC_007136.6:455806-461134	control	15	OK	0.917038	2.24774	1.29342	2.82271	0.0067	0.25693
si:ch1073-396h14.1	NC_007133.6:15619541-15666907	control	15	OK	6.68494	10.4205	0.640436	2.00877	0.0418	0.688211
si:ch1073-459j12.1	NC_007119.6:44765648-44806787	control	15	OK	14.0821	6.42116	-1.13296	-3.63911	0.00035	0.0331638
si:ch1073-76a20.1	NC_007134.6:44137596-44190215	control	15	OK	1.90186	0.925429	-1.03922	-2.63495	0.00925	0.313359
si:ch211-105f12.2	NC_007126.6:15439308-15447039	control	15	OK	1.68733	0.489986	-1.78393	-3.21093	0.0032	0.158021
si:ch211-105j21.7	NC_007117.6:48978666-49050384	control	15	OK	3.1501	1.38733	-1.18308	-2.57514	0.00935	0.315373
si:ch211-106h11.3	NC_007114.6:5665308-5706191	control	15	OK	3.00959	1.8351	-0.713706	-1.90539	0.04815	0.7229
si:ch211-106h4.12	NC_007113.6:31682612-31685893	control	15	OK	3.2689	0.978752	-1.73979	-2.6534	0.0137	0.393001
si:ch211-106h4.9	NC_007113.6:31643563-31681006	control	15	OK	2.82381	1.59891	-0.82055	-2.20424	0.024	0.526159
si:ch211-106n13.3	NC_007113.6:50252857-50325896	control	15	OK	0.934071	0.369915	-1.33634	-2.72751	0.0071	0.267148
si:ch211-107o23.1	NC_007129.6:27095418-27104960	control	15	OK	2.54734	6.97582	1.45337	3.87766	0.0003	0.0297548
si:ch211-117l17.6	NC_007133.6:24261206-24270998	control	15	OK	0.323168	1.5869	2.29586	2.79319	0.03405	0.623831
si:ch211-117m20.5	NC_007116.6:30014378-30015598	control	15	OK	346.062	748.427	1.11283	3.31786	0.0011	0.0774124
si:ch211-117n7.6	NC_007124.6:9543730-9671942	control	15	OK	2.70093	0.861212	-1.64901	-2.14769	0.04265	0.693724
si:ch211-119o8.7	NC_007113.6:39055621-39062430	control	15	OK	1.4435	0	#NAME?	#NAME?	0.00045	0.0399878
si:ch211-120m16.6	NC_007114.6:61057146-61104236	control	15	OK	2.06889	0.907971	-1.18814	-3.13631	0.00185	0.109875
si:ch211-125o16.4	NC_007128.6:22524809-22532910	control	15	OK	25.6423	42.2716	0.721159	2.23115	0.0225	0.510041
si:ch211-126g16.11	NC_007119.6:13481046-13562644	control	15	OK	5.06327	10.5766	1.06273	1.99168	0.03815	0.657327
si:ch211-12d10.5	NC_007124.6:32866563-32891934	control	15	OK	4.02656	2.18936	-0.879042	-2.31395	0.02155	0.498512
si:ch211-133j6.3	NC_007134.6:10417950-10421158	control	15	OK	0.925125	0.162248	-2.51145	-3.27987	0.01635	0.432029
si:ch211-142k18.1	NC_007131.6:19879786-19892371	control	15	OK	17.196	7.06323	-1.28367	-2.89146	0.00285	0.146955
si:ch211-149l1.2	NC_007112.6:49031518-49054663	control	15	OK	1.51749	2.64033	0.799028	2.00688	0.0416	0.686856
si:ch211-14c7.2	NC_007129.6:46212167-46243811	control	15	OK	6.1055	3.63714	-0.747303	-2.33039	0.0155	0.418733
si:ch211-150f22.3	NC_007136.6:1469196-1478459	control	15	OK	2.63856	1.19133	-1.14718	-2.18364	0.0276	0.56263
si:ch211-150o23.2	NC_007119.6:17751594-17755223	control	15	OK	7.44046	12.2555	0.719963	2.01516	0.0427	0.694053
si:ch211-153l6.6	NC_007113.6:20772474-20785272	control	15	OK	1.30976	0.371505	-1.81785	-3.1854	0.0017	0.104146
si:ch211-155d24.7	NC_007117.6:8940139-8952420	control	15	OK	1.05661	0.393077	-1.42656	-2.18757	0.04275	0.694068
si:ch211-156j16.1	NC_007119.6:26694174-26846933	control	15	OK	56.3366	28.5269	-0.981752	-2.44855	0.01475	0.40833
si:ch211-157c3.4	NC_007114.6:27511538-27532313	control	15	OK	36.7607	83.4188	1.18221	3.78106	5e-05	0.00654421
si:ch211-158d24.4	NC_007119.6:41639777-41643876	control	15	OK	2.54966	5.32116	1.06143	2.54543	0.01025	0.326244
si:ch211-160j14.2	NC_007132.6:32018823-32027748	control	15	OK	2.04144	5.80108	1.50674	2.91551	0.00795	0.287246
si:ch211-161h7.8	NC_007135.6:20815793-20821194	control	15	OK	2.27217	8.05213	1.8253	4.80346	5e-05	0.00654421
si:ch211-173a9.7	NC_007128.6:52503659-52509667	control	15	OK	1.30223	4.41541	1.76156	3.71667	0.00165	0.102065
si:ch211-180a12.2	NC_007123.6:3962133-3991328	control	15	OK	0.842891	0.0733894	-3.5217	-4.07797	0.01765	0.450075
si:ch211-180j19.1	NC_007119.6:23895102-24062490	control	15	OK	1.7737	0.804085	-1.14134	-2.60147	0.00745	0.274998
si:ch211-181d7.1	NC_007126.6:42737392-42786105	control	15	OK	1.04332	2.00048	0.939167	2.25542	0.02315	0.517001
si:ch211-191a24.4	NC_007131.6:6543312-6550989	control	15	OK	4.09821	7.27358	0.827672	2.07951	0.0336	0.618825
si:ch211-191d15.2	NC_007116.6:19940084-19942250	control	15	OK	42.764	69.0247	0.690717	2.25301	0.02605	0.546956
si:ch211-199o1.2	NC_007119.6:24948450-24951954	control	15	OK	1.51274	4.9938	1.72297	4.10854	0.00035	0.0331638
si:ch211-202h22.7	NC_007112.6:53972319-53982327	control	15	OK	0.139472	9.23041	6.04834	4.20697	0.0223	0.507479
si:ch211-202h22.8	NC_007112.6:53961141-53971115	control	15	OK	1.07165	3.25365	1.60223	3.23555	0.0038	0.1761
si:ch211-207d6.2	NC_007113.6:29811746-29912575	control	15	OK	2.57788	4.05633	0.653991	2.05713	0.03545	0.634214
si:ch211-209j10.6	NC_007134.6:18978330-18986816	control	15	OK	1.57066	3.44757	1.13421	2.25181	0.0227	0.511897
si:ch211-212c13.10	NC_007126.6:21055653-21078613	control	15	OK	2.70456	4.52573	0.742755	2.0357	0.0371	0.647682
si:ch211-213d14.2	NC_007126.6:17819182-17821011	control	15	OK	17.7195	4.54136	-1.96414	-4.76274	5e-05	0.00654421
si:ch211-214j24.9	NC_007115.6:5251684-5294315	control	15	OK	26.8263	15.508	-0.79064	-2.55315	0.00975	0.323873
si:ch211-216l23.2	NC_007129.6:17765408-17786844	control	15	OK	19.4905	11.3543	-0.779528	-2.4796	0.0132	0.384006
si:ch211-217k17.9	NC_007112.6:51757609-51765929	control	15	OK	8.33253	17.2555	1.05023	3.42025	0.0008	0.0609558
si:ch211-219a4.3	NC_007120.6:23954717-23968628	control	15	OK	0.700404	1.26341	0.851061	2.0382	0.04385	0.701336
si:ch211-222g5.3	NC_007134.6:19638050-19657471	control	15	OK	7.39604	4.29583	-0.783814	-2.26152	0.0251	0.537321
si:ch211-225b10.3	NC_007123.6:30245598-30251229	control	15	OK	2.57905	4.80437	0.897506	2.10911	0.04	0.67249
si:ch211-225b11.1	NC_007116.6:20282970-20310917	control	15	OK	2.40573	14.9751	2.63802	7.75618	5e-05	0.00654421
si:ch211-229n2.7	NC_007119.6:14045396-14054214	control	15	OK	6.32557	15.1207	1.25726	2.83077	0.004	0.181524
si:ch211-232m10.6	NC_007130.6:10437428-10454859	control	15	OK	0.908215	0.153143	-2.56815	-2.37622	0.0269	0.556132
si:ch211-234p18.3	NC_007129.6:26353343-26436025	control	15	OK	2.0121	1.17562	-0.775276	-2.04844	0.03715	0.647909
si:ch211-234p6.5	NC_007135.6:38249491-38304106	control	15	OK	1.86056	0.643054	-1.53272	-3.13954	0.00255	0.136304
si:ch211-239f4.1	NC_007112.6:44516275-44589642	control	15	OK	3.07252	1.69798	-0.855604	-2.42885	0.01195	0.359748
si:ch211-23l10.2	NC_007114.6:16296741-16310315	control	15	OK	2.37443	1.0797	-1.13695	-2.73921	0.0073	0.271753
si:ch211-250g4.3	NC_007130.6:37922500-37980379	control	15	OK	0.36044	1.19033	1.72353	5.35563	5e-05	0.00654421
si:ch211-250i3.4	NC_007114.6:36759037-36803147	control	15	OK	1.05073	0.565331	-0.894222	-2.05091	0.04345	0.699265
si:ch211-255g12.6	NC_007119.6:6911416-6914625	control	15	OK	115.861	15.3792	-2.91334	-8.15643	5e-05	0.00654421
si:ch211-256m1.8	NC_007114.6:25023559-25034579	control	15	OK	8.25985	5.39428	-0.614684	-1.99261	0.0444	0.701336
si:ch211-264f5.6	NC_007130.6:5808583-5851476	control	15	OK	16.2476	28.3372	0.802468	2.37928	0.01465	0.407563
si:ch211-273l18.3	NC_007117.6:37482568-37491870	control	15	OK	1.66378	0.726245	-1.19594	-2.39636	0.02285	0.513487
si:ch211-274f20.2	NC_007125.6:8703581-8723080	control	15	OK	1.52235	0.737733	-1.04513	-1.97814	0.0496	0.729192
si:ch211-276c2.2	NC_007126.6:41598209-41706897	control	15	OK	0.85713	0.353832	-1.27645	-2.19743	0.0204	0.486039
si:ch211-40k21.5	NC_007135.6:36373232-36383305	control	15	OK	5.88548	9.92248	0.753539	1.9558	0.048	0.721112
si:ch211-48m9.1	NC_007116.6:27441809-27519893	control	15	OK	0.631554	0.143582	-2.13703	-2.46159	0.03415	0.624455
si:ch211-57h10.1	NC_007116.6:38963146-39063582	control	15	OK	1.56106	0.465785	-1.74479	-2.27784	0.04055	0.677831
si:ch211-67e16.11	NC_007120.6:14180970-14227313	control	15	OK	4.0792	2.09476	-0.961499	-2.63956	0.0076	0.27921
si:ch211-76l23.4	NC_007114.6:28692566-28697416	control	15	OK	6.48291	3.48668	-0.894789	-2.26782	0.02565	0.543118
si:ch211-79k12.1	NC_007127.6:24607791-24634757	control	15	OK	21.6148	33.151	0.617029	2.00275	0.04595	0.710277
si:ch211-81a5.1	NC_007130.6:9085380-9101770	control	15	OK	4.5878	2.31341	-0.987785	-2.40006	0.00915	0.311327
si:ch211-87l8.3	NC_007131.6:50433983-50437851	control	15	OK	1.17674	0.335605	-1.80996	-2.79611	0.00245	0.132068
si:ch211-91p5.3	NC_007136.6:27185803-27222802	control	15	OK	0.563311	1.27267	1.17585	2.59605	0.01105	0.341764
si:ch211-93g23.2	NC_007112.6:5907572-5948369	control	15	OK	0.281935	2.31917	3.04018	2.65574	0.022	0.503433
si:ch73-103b2.3	NC_007127.6:26143923-26145240	control	15	OK	1.99145	0.150908	-3.72208	-2.88902	0.04435	0.701336
si:ch73-111m19.2	NC_007123.6:45515706-45527077	control	15	OK	7.26006	2.90036	-1.32375	-2.50686	0.01225	0.365948
si:ch73-160h15.3	NC_007112.6:46139075-46141640	control	15	OK	2.2547	4.74836	1.07449	2.18485	0.02915	0.578071
si:ch73-185c24.2	NC_007117.6:34043832-34052046	control	15	OK	1.86727	0.52099	-1.8416	-3.0973	0.00825	0.294589
si:ch73-290k24.5	NC_007134.6:45825128-45872044	control	15	OK	1.64832	0.705364	-1.22456	-2.31471	0.0256	0.542715
si:ch73-31d8.2	NC_007127.6:48811529-48814685	control	15	OK	2.97538	0.852232	-1.80376	-2.36372	0.03885	0.662864
si:ch73-337l15.2	NC_007116.6:43672170-43686657	control	15	OK	0.841524	1.81247	1.10688	2.29701	0.02775	0.564374
si:ch73-34j14.3	NC_007128.6:26551085-26568458	control	15	OK	5.90268	2.60875	-1.17801	-3.18347	0.00175	0.106095
[truncated: 592 more rows]

## Sheet: S7
Category	Term	Count	%	PValue	Genes	List Total	Pop Hits	Pop Total	Fold Enrichment	Bonferroni	Benjamini	FDR
[truncated: 13 more rows]

[truncated: 4 more sheets: S8, S9, S10, S11]
